# Supplementary material for: Optical and radar Earth observation data for upscaling methane emissions linked to permafrost degradation in sub-Arctic peatlands in northern Sweden
Source: Copernicus journal article supplement (doi:10.5194/bg-20-4221-2023), 2023-10-16
Supplement: Supplementary file 1 [file bg-20-4221-2023-supplement.zip]

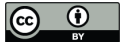

*Supplement of*

## **Optical and radar Earth observation data for upscaling methane emissions linked to permafrost degradation in sub-Arctic peatlands in northern Sweden**

**Sofie Sjögersten et al.**

*Correspondence to:* Sofie Sjögersten ([sofie.sjogersten@nottingham.ac.uk](mailto:sofie.sjogersten@nottingham.ac.uk))

- [bg-20-4221-2023-supplement-title-page.pdf](#)
- [Supplement 1.pdf](#)
- [Supplement 2\\_confusion\\_matrices.xlsx](#)
- [Supplement 3.zip](#)

The copyright of individual parts of the supplement might differ from the article licence.
