# Supplementary material for: Optical and radar Earth observation data for upscaling methane emissions linked to permafrost degradation in sub-Arctic peatlands in northern Sweden
Source: Copernicus journal article supplement (doi:10.5194/bg-20-4221-2023), 2023-10-16
Supplement: Supplementary file 2 [file bg-20-4221-2023-supplement.zip]

Archive with 4 entries (4 files):
- bg-20-4221-2023-supplement-title-page.pdf
- Supplement 1.pdf
- Supplement 2_confusion_matrices.xlsx
- Supplement 3.zip
