# Supplementary material for: Optical and radar Earth observation data for upscaling methane emissions linked to permafrost degradation in sub-Arctic peatlands in northern Sweden
Source: Copernicus journal article supplement (doi:10.5194/bg-20-4221-2023), 2023-10-16
Supplement: Supplementary file 2 [file bg-20-4221-2023-supplement.zip › Supplement 1.pdf]

**Table S1. Sentinel-2 data specification. Wavebands listed with a spatial resolution of 10 m were resampled to 20 m to match other wavebands.**

| Sentinel-2 waveband | Wavelength (nm) | Spatial resolution (m) |
|---------------------|-----------------|------------------------|
| B2                  | 490             | 10                     |
| B3                  | 560             | 10                     |
| B4                  | 665             | 10                     |
| B5                  | 705             | 20                     |
| B6                  | 740             | 20                     |
| B7                  | 783             | 20                     |
| B8a                 | 865             | 20                     |
| B11                 | 1610            | 20                     |
| B12                 | 2190            | 20                     |
