# Supplementary material for: Optical and radar Earth observation data for upscaling methane emissions linked to permafrost degradation in sub-Arctic peatlands in northern Sweden
Source: Copernicus journal article supplement (doi:10.5194/bg-20-4221-2023), 2023-10-16
Supplement: Supplementary file 2 [file bg-20-4221-2023-supplement.zip › Supplement 2_confusion_matrices.xlsx]

## Sheet: Instructions
CONFUSION MATRICES
The confusion matrices included in this document are for the optimal models produced. Optimal models are those with the highest overall accuracy achieved.
Sheet name:	Overall accuracy (%):	Sheet description:
Turisten21_50cm	71.0145	Vegetation classification from UAV imagery by Support Vector Machine. Validated by ground measurements. Where NAs exist for classes in confusion matrix, this was because there was no ground validation data for these classes.
Storflaket20_50cm	70.7071	Vegetation classification from UAV imagery by Support Vector Machine. Validated by ground measurements. Where NAs exist for classes in confusion matrix, this was because there was no ground validation data for these classes.
Stordalen20_50cm	69.7531	Vegetation classification from UAV imagery by Support Vector Machine. Validated by ground measurements. Where NAs exist for classes in confusion matrix, this was because there was no ground validation data for these classes.
Mixedpixel_NN_10neurons	74.3806	Vegetation classification from S2 imagery by mixed pixel NN model. Train and test data derived from UAV vegetation classifications of all three sites. Stratified random pixel selection for test and train data by vegetation class. 10 neurons. DEM, ROUGH and SLOPE from Swedish Gov included as variables in model alongside S2 bands.
Mixedpixel_NN_10neurons_classif	92.5972	Vegetation classification from S2 imagery by mixed pixel NN model. Train and test data derived from UAV vegetation classifications of all three sites. Random pixel selection from classified data by vegetation class. 10 neurons. DEM, ROUGH and SLOPE from Swedish Gov included as variables in model alongside S2 bands.
Majority_NN_3neurons	39.9577	Vegetation classification from S2 imagery by majority NN model. Train and test data derived from UAV vegetation classifications of all three sites. Stratified random pixel selection for test and train data by vegetation class. 7 neurons. DEM, ROUGH and SLOPE from Swedish Gov included as variables in model alongside S2 bands.
Majority_NN_3neurons_classif	#NAME?	Vegetation classification from S2 imagery by majority NN model. Train and test data derived from UAV vegetation classifications of all three sites. Random pixel selection from classified data by vegetation class. 3 neurons. DEM, ROUGH and SLOPE from Swedish Gov included as variables in model alongside S2 bands.
Fuzzy confusion matrix formatting outlined below:
Concept is the same as a hard classification - the difference is that the confusion matrix is calculated using AREA, rather than pixel counts. Used method outlined by Olofsson et al (2014)
1) Sum the total proportions for each class - for both reference and classified data. These are the "total grades of membership"
2) For each class, the min proportion between classified vs reference data.
3) Calculate user, producer and overall accuracy as usual

## Sheet: Turisten21_50cm
69	validation															Total	User accuracy	Mapped area (m^2)	Mapped area (ha)	Mapped area proportion
predicted	Anthropogenic	Water bodies	Exposed rock	Shadows	Sparse birch forest	Forested wetland	Dry lichen	Dry lichen subsiding	Willow wetland	Sphagnum wetland	Sedge/Eriophorum	Moist moss	Moist moss subsiding	Dwarf shrub	Dwarf shrub subsiding
Anthropogenic	NA	NA	NA	NA	NA	NA	NA	NA	NA	NA	NA	NA	NA	NA	NA	0	#VALUE!	18036	1.8036	0.153643
Water bodies	NA	NA	NA	NA	NA	NA	NA	NA	NA	NA	NA	NA	NA	NA	NA	0	#VALUE!	441.5	0.04415	0.00376101
Exposed rock	NA	NA	NA	NA	NA	NA	NA	NA	NA	NA	NA	NA	NA	NA	NA	0	#VALUE!	NA	NA	NA
Shadows	NA	NA	NA	NA	NA	NA	NA	NA	NA	NA	NA	NA	NA	NA	NA	0	#VALUE!	NA	NA	NA
Sparse birch forest	NA	NA	NA	NA	NA	NA	NA	NA	NA	NA	NA	NA	NA	NA	NA	0	#VALUE!	28347.2	2.83473	0.241482
Forested wetland	NA	NA	NA	NA	NA	NA	NA	NA	NA	NA	NA	NA	NA	NA	NA	0	#VALUE!	37581.5	3.75815	0.320146
Dry lichen	NA	NA	NA	NA	NA	NA	NA	NA	NA	NA	NA	NA	NA	NA	NA	0	#VALUE!	22	0.0022	0.000187411
Dry lichen subsiding	NA	NA	NA	NA	NA	NA	NA	NA	NA	NA	NA	NA	NA	NA	NA	0	#DIV/0!	36.75	0.003675	0.000313062
Willow wetland	NA	NA	NA	NA	NA	NA	NA	0	4	0	0	0	0	1	1	6	66.6667	3922	0.3922	0.0334104
Sphagnum wetland	NA	NA	NA	NA	NA	NA	NA	0	0	11	1	0	0	0	2	14	78.5714	8272	0.8272	0.0704667
Sedge/Eriophorum	NA	NA	NA	NA	NA	NA	NA	0	0	0	9	0	1	0	0	10	90	3506	0.3506	0.0298666
Moist moss	NA	NA	NA	NA	NA	NA	NA	0	0	0	0	2	2	0	0	4	50	1444	0.1444	0.012301
Moist moss subsiding	NA	NA	NA	NA	NA	NA	NA	1	0	0	0	5	9	1	1	17	52.9412	4029	0.4029	0.0343219
Dwarf shrub	NA	NA	NA	NA	NA	NA	NA	0	0	0	0	0	0	5	0	5	100	4944.75	0.494475	0.0421229
Dwarf shrub subsiding	NA	NA	NA	NA	NA	NA	NA	0	1	1	0	0	0	2	9	13	69.2308	6806	0.6806	0.0579783
Total	0	0	0	0	0	0	0	1	5	12	10	7	12	9	13	69		117389	11.7389	1
Producer accuracy	#VALUE!	#VALUE!	#VALUE!	#VALUE!	#VALUE!	#VALUE!	#VALUE!	#VALUE!	80	91.6667	90	28.5714	75	55.5556	69.2308
Overall accuracy:	71.0145
* simply changed classes without CH4 measurements to NA for both predicted and validation.
AREA PROPORTIONS
0.280468	validation															Total	User accuracy	Mapped area (m^2)	Mapped area (ha)	Mapped area proportion
predicted	Anthropogenic	Water bodies	Exposed rock	Shadows	Sparse birch forest	Forested wetland	Dry lichen	Dry lichen subsiding	Willow wetland	Sphagnum wetland	Sedge/Eriophorum	Moist moss	Moist moss subsiding	Dwarf shrub	Dwarf shrub subsiding
Anthropogenic	NA	NA	NA	NA	NA	NA	NA	NA	NA	NA	NA	NA	NA	NA	NA	0	#VALUE!	18036	1.8036	0.153643
Water bodies	NA	NA	NA	NA	NA	NA	NA	NA	NA	NA	NA	NA	NA	NA	NA	0	#VALUE!	441.5	0.04415	0.00376101
Exposed rock	NA	NA	NA	NA	NA	NA	NA	NA	NA	NA	NA	NA	NA	NA	NA	0	#VALUE!	NA	NA	NA
Shadows	NA	NA	NA	NA	NA	NA	NA	NA	NA	NA	NA	NA	NA	NA	NA	0	#VALUE!	NA	NA	NA
Sparse birch forest	NA	NA	NA	NA	NA	NA	NA	NA	NA	NA	NA	NA	NA	NA	NA	0	#VALUE!	28347.2	2.83473	0.241482
Forested wetland	NA	NA	NA	NA	NA	NA	NA	NA	NA	NA	NA	NA	NA	NA	NA	0	#VALUE!	37581.5	3.75815	0.320146
Dry lichen	NA	NA	NA	NA	NA	NA	NA	NA	NA	NA	NA	NA	NA	NA	NA	0	#VALUE!	22	0.0022	0.000187411
Dry lichen subsiding	NA	NA	NA	NA	NA	NA	NA	NA	NA	NA	NA	NA	NA	NA	NA	0	#DIV/0!	36.75	0.003675	0.000313062
Willow wetland	NA	NA	NA	NA	NA	NA	NA	0	0.0222736	0	0	0	0	0.00556839	0.00556839	0.0334104	66.6667	3922	0.3922	0.0334104
Sphagnum wetland	NA	NA	NA	NA	NA	NA	NA	0	0	0.0553667	0.00503334	0	0	0	0.0100667	0.0704667	78.5714	8272	0.8272	0.0704667
Sedge/Eriophorum	NA	NA	NA	NA	NA	NA	NA	0	0	0	0.0268799	0	0.00298666	0	0	0.0298666	90	3506	0.3506	0.0298666
Moist moss	NA	NA	NA	NA	NA	NA	NA	0	0	0	0	0.0061505	0.0061505	0	0	0.012301	50	1444	0.1444	0.012301
Moist moss subsiding	NA	NA	NA	NA	NA	NA	NA	0.00201893	0	0	0	0.0100947	0.0181704	0.00201893	0.00201893	0.0343219	52.9412	4029	0.4029	0.0343219
Dwarf shrub	NA	NA	NA	NA	NA	NA	NA	0	0	0	0	0	0	0.0421229	0	0.0421229	100	4944.75	0.494475	0.0421229
Dwarf shrub subsiding	NA	NA	NA	NA	NA	NA	NA	0	0.00445987	0.00445987	0	0	0	0.00891974	0.0401388	0.0579783	69.2308	6806	0.6806	0.0579783
Total	0	0	0	0	0	0	0	0.00201893	0.0267334	0.0598266	0.0319133	0.0162452	0.0273076	0.0586299	0.0577928			117389	11.7389	1
Producer accuracy	#VALUE!	#VALUE!	#VALUE!	#VALUE!	#VALUE!	#VALUE!	#VALUE!	#VALUE!	83.3173	92.5453	84.2281	37.8605	66.5398	71.8453	69.453

## Sheet: Storflaket20_50cm
99	validation															Total	User accuracy	Mapped area (m^2)	Mapped area (ha)	Mapped area proportion
predicted	Anthropogenic	Water bodies	Exposed rock	Shadows	Sparse birch forest	Forested wetland	Dry lichen	Dry lichen subsiding	Willow wetland	Sphagnum wetland	Sedge / Eriophorum	Moist moss	Moist moss subsiding	Dwarf shrub	Dwarf shrub subsiding
Anthropogenic	NA	NA	NA	NA	NA	NA	NA	NA	NA	NA	NA	NA	NA	NA	NA	0	#VALUE!	21268.8	2.12688	0.0726302
Water bodies	NA	NA	NA	NA	NA	NA	NA	NA	NA	NA	NA	NA	NA	NA	NA	0	#VALUE!	3428	0.3428	0.0117062
Exposed rock	NA	NA	NA	NA	NA	NA	NA	NA	NA	NA	NA	NA	NA	NA	NA	0	#VALUE!	15362.8	1.53628	0.0524619
Shadows	NA	NA	NA	NA	NA	NA	NA	NA	NA	NA	NA	NA	NA	NA	NA	0	#VALUE!	17047.5	1.70475	0.0582151
Sparse birch forest	NA	NA	NA	NA	NA	NA	NA	NA	NA	NA	NA	NA	NA	NA	NA	0	#VALUE!	18188.8	1.81888	0.0621124
Forested wetland	NA	NA	NA	NA	NA	NA	NA	NA	NA	NA	NA	NA	NA	NA	NA	0	#VALUE!	39773	3.9773	0.13582
Dry lichen	NA	NA	NA	NA	NA	NA	5	0	0	0	0	0	0	0	0	5	100	1771.5	0.17715	0.00604946
Dry lichen subsiding	NA	NA	NA	NA	NA	NA	0	8	0	1	1	1	3	0	0	14	57.1429	14829	1.4829	0.0506392
Willow wetland	NA	NA	NA	NA	NA	NA	0	0	6	0	0	0	0	2	0	8	75	26810.5	2.68105	0.0915546
Sphagnum wetland	NA	NA	NA	NA	NA	NA	1	0	0	9	3	0	0	0	0	13	69.2308	22496.2	2.24962	0.0768219
Sedge / Eriophorum	NA	NA	NA	NA	NA	NA	0	0	0	2	9	0	1	0	0	12	75	48349.5	4.83495	0.165108
Moist moss	NA	NA	NA	NA	NA	NA	5	1	0	0	0	13	2	3	1	25	52	48609.5	4.86095	0.165996
Moist moss subsiding	NA	NA	NA	NA	NA	NA	0	0	0	0	0	0	3	0	0	3	100	1433.5	0.14335	0.00489523
Dwarf shrub	NA	NA	NA	NA	NA	NA	0	0	0	0	0	0	0	6	0	6	100	8965	0.8965	0.0306144
Dwarf shrub subsiding	NA	NA	NA	NA	NA	NA	0	0	1	0	1	0	0	0	11	13	84.6154	4502.75	0.450275	0.0153763
Total	0	0	0	0	0	0	11	9	7	12	14	14	9	11	12			292836	29.2836	1
Producer accuracy	#VALUE!	#VALUE!	#VALUE!	#VALUE!	#VALUE!	#VALUE!	45.4545	88.8889	85.7143	75	64.2857	92.8571	33.3333	54.5455	91.6667
Overall accuracy:	70.7071
AREA PROPORTIONS
0.607054	validation															Total	User accuracy	Mapped area (m^2)	Mapped area (ha)	Mapped area proportion
predicted	Anthropogenic	Water bodies	Exposed rock	Shadows	Sparse birch forest	Forested wetland	Dry lichen	Dry lichen subsiding	Willow wetland	Sphagnum wetland	Sedge / Eriophorum	Moist moss	Moist moss subsiding	Dwarf shrub	Dwarf shrub subsiding
Anthropogenic	NA	NA	NA	NA	NA	NA	NA	NA	NA	NA	NA	NA	NA	NA	NA	0	#VALUE!	21268.8	2.12688	0.0726302
Water bodies	NA	NA	NA	NA	NA	NA	NA	NA	NA	NA	NA	NA	NA	NA	NA	0	#VALUE!	3428	0.3428	0.0117062
Exposed rock	NA	NA	NA	NA	NA	NA	NA	NA	NA	NA	NA	NA	NA	NA	NA	0	#VALUE!	15362.8	1.53628	0.0524619
Shadows	NA	NA	NA	NA	NA	NA	NA	NA	NA	NA	NA	NA	NA	NA	NA	0	#VALUE!	17047.5	1.70475	0.0582151
Sparse birch forest	NA	NA	NA	NA	NA	NA	NA	NA	NA	NA	NA	NA	NA	NA	NA	0	#VALUE!	18188.8	1.81888	0.0621124
Forested wetland	NA	NA	NA	NA	NA	NA	NA	NA	NA	NA	NA	NA	NA	NA	NA	0	#VALUE!	39773	3.9773	0.13582
Dry lichen	NA	NA	NA	NA	NA	NA	0.00604946	0	0	0	0	0	0	0	0	0.00604946	100	1771.5	0.17715	0.00604946
Dry lichen subsiding	NA	NA	NA	NA	NA	NA	0	0.0289367	0	0.00361709	0.00361709	0.00361709	0.0108513	0	0	0.0506392	57.1429	14829	1.4829	0.0506392
Willow wetland	NA	NA	NA	NA	NA	NA	0	0	0.0686659	0	0	0	0	0.0228886	0	0.0915546	75	26810.5	2.68105	0.0915546
Sphagnum wetland	NA	NA	NA	NA	NA	NA	0.00590938	0	0	0.0531844	0.0177281	0	0	0	0	0.0768219	69.2308	22496.2	2.24962	0.0768219
Sedge / Eriophorum	NA	NA	NA	NA	NA	NA	0	0	0	0.0275179	0.123831	0	0.013759	0	0	0.165108	75	48349.5	4.83495	0.165108
Moist moss	NA	NA	NA	NA	NA	NA	0.0331991	0.00663982	0	0	0	0.0863177	0.0132796	0.0199195	0.00663982	0.165996	52	48609.5	4.86095	0.165996
Moist moss subsiding	NA	NA	NA	NA	NA	NA	0	0	0	0	0	0	0.00489523	0	0	0.00489523	100	1433.5	0.14335	0.00489523
Dwarf shrub	NA	NA	NA	NA	NA	NA	0	0	0	0	0	0	0	0.0306144	0	0.0306144	100	8965	0.8965	0.0306144
Dwarf shrub subsiding	NA	NA	NA	NA	NA	NA	0	0	0.0011828	0	0.0011828	0	0	0	0.0130107	0.0153763	84.6154	4502.75	0.450275	0.0153763
Total	0	0	0	0	0	0	0.0451579	0.0355765	0.0698487	0.0843194	0.146359	0.0899347	0.0427851	0.0734225	0.0196506			292836	29.2836	1
Producer accuracy	#VALUE!	#VALUE!	#VALUE!	#VALUE!	#VALUE!	#VALUE!	13.3962	81.3365	98.3066	63.0749	84.6077	95.9781	11.4414	41.6962	66.2105

## Sheet: Stordalen20_50cm
162	validation															Total	User accuracy	Mapped area (m^2)	Mapped area (ha)	Mapped area proportion
predicted	Anthropogenic	Water bodies	Exposed rock	Shadows	Sparse birch forest	Forested wetland	Dry lichen	Dry lichen subsiding	Willow wetland	Sphagnum wetland	Sedge / Eriophorum	Moist moss	Moist moss subsiding	Dwarf shrub	Dwarf shrub subsiding
Anthropogenic	NA	NA	NA	NA	NA	NA	NA	NA	NA	NA	NA	NA	NA	NA	NA	0	#VALUE!	5010	0.501	0.0113415
Water bodies	NA	NA	NA	NA	NA	NA	NA	NA	NA	NA	NA	NA	NA	NA	NA	0	#VALUE!	34637.8	3.46378	0.0784122
Exposed rock	NA	NA	NA	NA	NA	NA	NA	NA	NA	NA	NA	NA	NA	NA	NA	0	#VALUE!	6957.75	0.695775	0.0157508
Shadows	NA	NA	NA	NA	NA	NA	NA	NA	NA	NA	NA	NA	NA	NA	NA	0	#VALUE!	4132.5	0.41325	0.00935507
Sparse birch forest	NA	NA	NA	NA	NA	NA	NA	NA	NA	NA	NA	NA	NA	NA	NA	0	#VALUE!	28560	2.856	0.0646535
Forested wetland	NA	NA	NA	NA	NA	NA	NA	NA	NA	NA	NA	NA	NA	NA	NA	0	#VALUE!	71460.2	7.14603	0.16177
Dry lichen	NA	NA	NA	NA	NA	NA	3	0	0	0	0	0	0	0	0	3	100	2453.5	0.24535	0.00555418
Dry lichen subsiding	NA	NA	NA	NA	NA	NA	0	1	0	0	0	0	0	0	0	1	100	117	0.0117	0.000264862
Willow wetland	NA	NA	NA	NA	NA	NA	0	0	10	1	3	0	0	0	4	18	55.5556	65232.2	6.52323	0.147671
Sphagnum wetland	NA	NA	NA	NA	NA	NA	0	0	0	43	1	0	3	1	3	51	84.3137	70721.2	7.07213	0.160097
Sedge / Eriophorum	NA	NA	NA	NA	NA	NA	0	0	4	2	16	1	0	0	0	23	69.5652	59868	5.9868	0.135528
Moist moss	NA	NA	NA	NA	NA	NA	4	2	0	0	0	12	10	1	0	29	41.3793	56123.8	5.61238	0.127052
Moist moss subsiding	NA	NA	NA	NA	NA	NA	0	0	0	0	0	0	7	0	0	7	100	5706.5	0.57065	0.0129183
Dwarf shrub	NA	NA	NA	NA	NA	NA	0	0	0	1	0	0	1	7	1	10	70	17848.2	1.78483	0.0404045
Dwarf shrub subsiding	NA	NA	NA	NA	NA	NA	0	0	0	1	1	0	1	3	14	20	70	12910.5	1.29105	0.0292265
Total	0	0	0	0	0	0	7	3	14	48	21	13	22	12	22			441739	44.1739	1
Producer accuracy	#VALUE!	#VALUE!	#VALUE!	#VALUE!	#VALUE!	#VALUE!	42.8571	33.3333	71.4286	89.5833	76.1905	92.3077	31.8182	58.3333	63.6364
Overall accuracy:	69.7531
AREA PROPORTIONS
0.658717	validation															Total	User accuracy	Mapped area (m^2)	Mapped area (ha)	Mapped area proportion
predicted	Anthropogenic	Water bodies	Exposed rock	Shadows	Sparse birch forest	Forested wetland	Dry lichen	Dry lichen subsiding	Willow wetland	Sphagnum wetland	Sedge / Eriophorum	Moist moss	Moist moss subsiding	Dwarf shrub	Dwarf shrub subsiding
Anthropogenic	NA	NA	NA	NA	NA	NA	NA	NA	NA	NA	NA	NA	NA	NA	NA	0	#VALUE!	5010	0.501	0.0113415
Water bodies	NA	NA	NA	NA	NA	NA	NA	NA	NA	NA	NA	NA	NA	NA	NA	0	#VALUE!	34637.8	3.46378	0.0784122
Exposed rock	NA	NA	NA	NA	NA	NA	NA	NA	NA	NA	NA	NA	NA	NA	NA	0	#VALUE!	6957.75	0.695775	0.0157508
Shadows	NA	NA	NA	NA	NA	NA	NA	NA	NA	NA	NA	NA	NA	NA	NA	0	#VALUE!	4132.5	0.41325	0.00935507
Sparse birch forest	NA	NA	NA	NA	NA	NA	NA	NA	NA	NA	NA	NA	NA	NA	NA	0	#VALUE!	28560	2.856	0.0646535
Forested wetland	NA	NA	NA	NA	NA	NA	NA	NA	NA	NA	NA	NA	NA	NA	NA	0	#VALUE!	71460.2	7.14603	0.16177
Dry lichen	NA	NA	NA	NA	NA	NA	0.00555418	0	0	0	0	0	0	0	0	0.00555418	100	2453.5	0.24535	0.00555418
Dry lichen subsiding	NA	NA	NA	NA	NA	NA	0	0.000264862	0	0	0	0	0	0	0	0.000264862	100	117	0.0117	0.000264862
Willow wetland	NA	NA	NA	NA	NA	NA	0	0	0.0820397	0.00820397	0.0246119	0	0	0	0.0328159	0.147671	55.5556	65232.2	6.52323	0.147671
Sphagnum wetland	NA	NA	NA	NA	NA	NA	0	0	0	0.134984	0.00313916	0	0.00941749	0.00313916	0.00941749	0.160097	84.3137	70721.2	7.07213	0.160097
Sedge / Eriophorum	NA	NA	NA	NA	NA	NA	0	0	0.0235701	0.011785	0.0942803	0.00589252	0	0	0	0.135528	69.5652	59868	5.9868	0.135528
Moist moss	NA	NA	NA	NA	NA	NA	0.0175244	0.00876219	0	0	0	0.0525731	0.043811	0.0043811	0	0.127052	41.3793	56123.8	5.61238	0.127052
Moist moss subsiding	NA	NA	NA	NA	NA	NA	0	0	0	0	0	0	0.0129183	0	0	0.0129183	100	5706.5	0.57065	0.0129183
Dwarf shrub	NA	NA	NA	NA	NA	NA	0	0	0	0.00404045	0	0	0.00404045	0.0282831	0.00404045	0.0404045	70	17848.2	1.78483	0.0404045
Dwarf shrub subsiding	NA	NA	NA	NA	NA	NA	0	0	0	0.00146133	0.00146133	0	0.00146133	0.00438398	0.0204586	0.0292265	70	12910.5	1.29105	0.0292265
Total	0	0	0	0	0	0	0.0230786	0.00902705	0.10561	0.160475	0.123493	0.0584657	0.0716485	0.0401874	0.0667324			441739	44.1739	1
Producer accuracy	#VALUE!	#VALUE!	#VALUE!	#VALUE!	#VALUE!	#VALUE!	24.0664	2.93409	77.6819	84.1154	76.3448	89.9214	18.03	70.3782	30.6576

## Sheet: Mixedpixel_NN_10neurons
	Predicted															Reference																		Reference data	Anthropogenic	Water bodies	Exposed rock	Shadows	Sparse birch forest	Forested wetland	Dry lichen	Dry lichen subsiding	Willow wetland	Sphagnum wetland	Sedge / Eriophorum	Moist moss	Moist moss subsiding	Dwarf shrub	Dwarf shrub subsiding
	1	2	3	4	5	6	7	8	9	10	11	12	13	14	15	X0	X1	X2	X3	X4	X5	X6	X7	X8	X9	X10	X11	X12	X13	X14			Classified data	CLASS	X0	X1	X2	X3	X4	X5	X6	X7	X8	X9	X10	X11	X12	X13	X14
1	7.48078e-06	0.0002118	0.00187507	4.60251e-37	0.273101	0.161952	0.00066313	2.74265e-06	0.0826921	0.00714848	0.00178717	0.00146245	0.0110748	0.0225675	4.69175e-05	0.0061	0	0	0	0.2835	0	0.0152	0.1402	0.2043	0.0427	0.0061	0.0274	0.2104	0.0244	0.0396			Anthropogenic	X0	8.33574	8.33574	8.33574	8.33574	8.33574	8.33574	2.5176	8.33574	8.33574	8.33574	8.33574	8.33574	7.1289	8.33574	8.33574
2	2.6057e-09	9.01997e-05	0.00090589	9.68546e-46	0.254719	0.0260928	0.000974116	4.91371e-05	0.468518	0.0226591	0.00914812	0.00524218	0.00856064	0.0146759	4.6171e-07	0	0	0	0	0.2972	0	0.0089	0.1281	0.1352	0.032	0.0018	0.0125	0.1406	0.0516	0.1922			Water bodies	X1	11.2147	11.2147	11.2147	10.9031	11.2147	11.2147	2.5176	11.2147	11.2147	11.2147	11.2147	11.2147	7.1289	11.2147	11.2147
3	0.0010174	0.000139201	0.0147562	8.49086e-23	0.250831	0.0242603	0.000894633	2.97876e-05	0.152647	0.0229487	0.0147139	0.0200127	0.0208048	0.0547617	0.000501073	0.0479	0.0009	0	0	0.5368	0	0	0.0083	0	0.0009	0.0046	0.0184	0.1372	0	0.2449			Exposed rock	X2	7.23558	7.23558	7.23558	7.23558	7.23558	7.23558	2.5176	7.23558	7.23558	7.23558	7.23558	7.23558	7.1289	7.23558	7.23558
4	0.000365446	0.00137538	0.00502563	5.25746e-18	0.0968589	0.155942	0.000983568	4.39923e-05	0.0228008	0.00937161	0.462838	0.00418087	0.0161654	0.0524172	0.00410147	0.0069	0.0006	0	0	0.3231	0	0	0	0	0.0006	0	0	0.0144	0	0.6544			Shadows	X3	0.0144075	0.0144075	0.0144075	0.0144075	0.0144075	0.0144075	0.0144075	0.0144075	0.0144075	0.0144075	0.0144075	0.0144075	0.0144075	0.0144075	0.0144075
5	0.000361668	0.000441633	0.00732397	1.61084e-16	0.250808	0.112561	0.000711483	9.55431e-06	0.0620295	0.00757451	0.0388684	0.00571954	0.0186869	0.0572484	0.0107473	0.0088	0	0	0	0.3081	0	0.0006	0.005	0.0069	0.0038	0.0006	0.0012	0.0462	0.0069	0.6119			Sparse birch forest	X4	29.4454	24.4741	13.0315	10.9031	32.2054	32.2054	2.5176	11.4994	32.2054	32.2054	32.2054	32.2054	7.1289	22	22.3063
6	0.00108109	0.000643906	0.0135484	9.41451e-17	0.172945	0.167109	0.00115258	6.43474e-05	0.0650636	0.0122487	0.228361	0.00640003	0.0138133	0.0396037	0.00436557	0.0025	0.0069	0	0	0.595	0	0	0	0	0	0	0.0012	0.0194	0	0.375			Forested wetland	X5	29.4454	24.4741	13.0315	10.9031	48.4984	56.2085	2.5176	11.4994	54.8354	49.9239	52.3748	56.2085	7.1289	22	22.3063
7	0.0107866	0.00105195	0.070898	1.13274e-11	0.220338	0.18035	0.00110497	0.000192468	0.0202715	0.00503753	0.0633377	0.00705248	0.0101697	0.0224732	0.00412745	0	0	0	0	0.4762	0	0	0.0159	0.1587	0.0635	0	0	0	0.0635	0.2222			Dry lichen	X6	1.79593	1.79593	1.79593	1.79593	1.79593	1.79593	1.79593	1.79593	1.79593	1.79593	1.79593	1.79593	1.79593	1.79593	1.79593
8	0.000404934	0.000496364	0.0111373	3.23248e-18	0.128197	0.167317	0.00146306	7.97677e-05	0.0599525	0.0173398	0.412588	0.00818482	0.0139311	0.047693	0.00205958	0	0	0	0	0.425	0	0	0.0056	0	0	0	0.0012	0.1363	0.0006	0.4312			Dry lichen subsiding	X7	3.05694	3.05694	3.05694	3.05694	3.05694	3.05694	2.5176	3.05694	3.05694	3.05694	3.05694	3.05694	3.05694	3.05694	3.05694
9	2.23884e-05	0.000569912	0.00636262	2.57822e-19	0.115152	0.172145	0.00150846	5.63393e-05	0.119695	0.0285448	0.322248	0.0065383	0.0101224	0.0416819	0.000626583	0	0	0	0	0.4406	0	0	0.0006	0	0	0	0	0.0569	0	0.5019			Willow wetland	X8	29.4454	24.4741	13.0315	10.9031	48.4984	64.1947	2.5176	11.4994	54.8354	49.9239	52.3748	59.8645	7.1289	22	22.3063
10	0.00698111	0.000439121	0.0315903	1.13323e-16	0.264893	0.0934465	0.000610503	1.73518e-05	0.0174508	0.00322777	0.0108522	0.00559869	0.0144296	0.0324618	0.00252153	0.0017	0	0	0	0.308	0	0	0.0643	0.1777	0.154	0.0034	0.0085	0.0186	0.132	0.132			Sphagnum wetland	X9	29.4454	24.4741	13.0315	10.9031	48.4984	64.1947	2.5176	11.4994	54.8354	49.9239	52.3748	59.8645	7.1289	22	22.3063
11	3.78251e-05	0.000398819	0.010961	3.07059e-24	0.265367	0.0159652	0.000966057	7.67178e-05	0.203409	0.0324593	0.00149409	0.0195779	0.0148613	0.0343246	9.73648e-05	0.0013	0.0006	0	0	0.467	0	0	0.0496	0.0144	0.0163	0.0031	0.0176	0.1017	0.005	0.3233			Sedge / Eriophorum	X10	29.4454	24.4741	13.0315	10.9031	48.4984	64.1947	2.5176	11.4994	54.8354	49.9239	52.3748	59.8645	7.1289	22	22.3063
12	0.000115888	0.000107816	0.00104318	9.19901e-39	0.261646	0.0306169	0.000299806	9.61808e-07	0.0601302	0.00350732	0.0084201	0.0022249	0.026822	0.0442877	0.000155822	0.015	0.0006	0	0	0.5387	0	0	0.025	0.0369	0.0719	0	0.0062	0.0025	0.1212	0.1819			Moist moss	X11	27.9715	24.4741	13.0315	10.9031	27.9715	27.9715	2.5176	11.4994	27.9715	27.9715	27.9715	27.9715	7.1289	22	22.3063
13	0.000329825	6.95296e-05	0.00109577	3.17496e-39	0.210641	0.00961565	0.00031853	2.15482e-06	0.111632	0.00792501	0.038	0.00520596	0.0372224	0.0643412	0.000105268	0	0	0	0	0.4019	0	0	0.0931	0.0838	0.2138	0.0056	0.0325	0.0169	0.1256	0.0269			Moist moss subsiding	X12	4.09357	4.09357	4.09357	4.09357	4.09357	4.09357	2.5176	4.09357	4.09357	4.09357	4.09357	4.09357	4.09357	4.09357	4.09357
14	0.000314183	0.000130838	0.0010634	6.05938e-41	0.246801	0.0273743	0.000338456	2.32736e-06	0.078955	0.00445763	0.0153953	0.00244941	0.0282583	0.0379821	0.000126943	0	0.0006	0	0	0.4794	0	0	0.1475	0.0106	0.0575	0.0006	0.0081	0.0144	0.2406	0.0406			Dwarf shrub	X13	18.9166	18.9166	13.0315	10.9031	18.9166	18.9166	2.5176	11.4994	18.9166	18.9166	18.9166	18.9166	7.1289	18.9166	18.9166
15	0.00275644	0.000128427	0.0123519	6.35562e-16	0.259918	0.0634629	0.000481754	1.88395e-06	0.0599906	0.00855133	0.0272748	0.00590721	0.0204182	0.0806057	0.0051902	0.0012	0	0	0	0.2494	0	0	0	0	0	0	0.0006	0.0106	0	0.7381			Dwarf shrub subsiding	X14	0.253086	0.253086	0.253086	0.253086	0.253086	0.253086	0.253086	0.253086	0.253086	0.253086	0.253086	0.253086	0.253086	0.253086	0.253086
16	0.00036121	0.000110687	0.00210138	1.36019e-26	0.107798	0.0317551	0.000912795	4.86564e-06	0.0674069	0.0230479	0.197748	0.0177108	0.0376106	0.147221	0.00136314	0	0	0	0	0.32	0.0012	0	0.0225	0.1838	0.0106	0.0606	0.0725	0.0606	0.2331	0.035				Grade of membership (reference)	29.4454	24.4741	13.0315	10.9031	48.4984	64.1947	2.5176	11.4994	54.8354	49.9239	52.3748	59.8645	7.1289	22	22.3063
17	0.000129408	0.00105139	0.00382598	2.06832e-24	0.315367	0.0454481	0.000326706	5.34655e-06	0.0768039	0.00630098	0.0014543	0.00159313	0.0139003	0.0261392	0.00062958	0	0	0	0	0.434	0	0	0.0404	0.1638	0.0099	0.0043	0.0043	0.0312	0.0624	0.2496				Producer accuracy	28.3091	45.8227	55.5237	0.132142	66.4052	87.5594	71.3351	26.5834	100	100	100	46.7247	57.4222	85.9845	1.1346
18	1.71898e-05	0.000217134	0.000759998	7.65309e-54	0.00608931	0.00452359	0.00435114	0.000324836	0.050147	0.352764	0.278019	0.091726	0.0218836	0.081361	1.00025e-08	0	0.0075	0	0	0	0	0	0.0219	0.0981	0.0412	0.125	0.6088	0.0106	0.0869	0
19	0.000166643	0.000119452	0.00144918	2.45432e-46	0.0210012	0.0275992	0.00358636	7.32682e-05	0.17797	0.230102	0.270498	0.0417182	0.0184144	0.0651481	5.99667e-07	0	0.0288	0	0	0.0019	0	0	0.005	0.3412	0.0219	0.0419	0.3731	0.0219	0.1625	0.0019
20	0.000284171	0.00953747	0.00595719	1.08242e-13	0.0746786	0.496445	0.00171877	8.39595e-05	0.117485	0.0210532	0.232181	0.00298951	0.00554079	0.0171855	0.00478383	0	0.0012	0	0	0.4569	0	0	0.0044	0	0	0	0.0006	0.0106	0	0.5262				AREA PROPORTIONS
21	5.2158e-05	0.000262867	0.00368778	5.25115e-29	0.280126	0.14781	0.000591809	2.64217e-06	0.0549134	0.00571125	0.00295114	0.00201884	0.0129432	0.0311224	0.000336867	0	0.0386	0	0	0.2948	0	0	0.0138	0.2011	0.0028	0	0	0.0771	0.157	0.2149				9.23219	validation
22	0.123325	0.000127899	0.00518364	3.04772e-72	0.416898	0.000402768	7.00796e-05	1.00198e-05	0.083253	0.00309588	2.31632e-06	0.000600657	0.0141284	0.00219143	6.21044e-10	0.7825	0	0	0	0.1988	0	0	0	0	0	0	0	0	0	0.0188				predicted	Anthropogenic	Water bodies	Exposed rock	Shadows	Sparse birch forest	Forested wetland	Dry lichen	Dry lichen subsiding	Willow wetland	Sphagnum wetland	Sedge / Eriophorum	Moist moss	Moist moss subsiding	Dwarf shrub	Dwarf shrub subsiding
23	0.000391886	6.77353e-05	0.00384382	6.31668e-35	0.278037	0.0692861	0.000361393	1.19891e-06	0.0502334	0.00358675	0.012194	0.0017143	0.0165552	0.0329259	9.1753e-05	0.0406	0.0562	0	0	0.7275	0	0.0006	0.0012	0	0	0.0012	0.0006	0.0138	0.0006	0.1575				Anthropogenic	0.0724329	0.0724329	0.0724329	0.0724329	0.0724329	0.0724329	0.0218765	0.0724329	0.0724329	0.0724329	0.0724329	0.0724329	0.0619462	0.0724329	0.0724329
24	7.27522e-05	0.000187191	0.00365044	4.5932e-37	0.0299654	0.0175056	0.00325828	0.000402039	0.081515	0.14941	0.468166	0.0545868	0.0211525	0.0771557	2.88843e-06	0	0.0112	0	0	0.0019	0	0	0.0106	0.0556	0.0388	0.1244	0.41	0.2712	0.0762	0				Water bodies	0.0551767	0.0551767	0.0551767	0.0536437	0.0551767	0.0551767	0.0123867	0.0551767	0.0551767	0.0551767	0.0551767	0.0551767	0.0350745	0.0551767	0.0551767
25	0.000562124	8.56454e-05	0.00737983	5.52875e-29	0.256436	0.163516	0.000830206	8.12711e-06	0.0498286	0.00397312	0.0816022	0.00488472	0.0175956	0.0373093	0.000879559	0	0	0	0	0.5581	0	0	0.0525	0	0.0019	0.0044	0.0212	0.0544	0.04	0.2675				Exposed rock	0.033286	0.033286	0.033286	0.033286	0.033286	0.033286	0.0115818	0.033286	0.033286	0.033286	0.033286	0.033286	0.0327952	0.033286	0.033286
26	0.000478046	2.46193e-05	0.00798363	2.83846e-32	0.254247	0.0515489	0.00113727	8.8071e-06	0.117611	0.0119121	0.0319325	0.0218303	0.0255479	0.0630565	0.000251968	0	0	0	0	0.4594	0	0.0006	0.0088	0	0	0	0.0006	0.17	0.0088	0.3519				Shadows	0.00345916	0.00345916	0.00345916	0.00345916	0.00345916	0.00345916	0.00345916	0.00345916	0.00345916	0.00345916	0.00345916	0.00345916	0.00345916	0.00345916	0.00345916
27	0.000226474	0.00010569	0.00261452	1.04849e-20	0.265052	0.0451136	0.000389805	6.79854e-07	0.0385429	0.00339325	0.0312104	0.00733344	0.0361818	0.120435	0.0151112	0.0006	0	0	0	0.2481	0	0.0012	0.0462	0.0006	0.0019	0	0.0069	0.1688	0.1075	0.4181				Sparse birch forest	0.12207	0.101461	0.0540238	0.0452002	0.133512	0.133512	0.010437	0.0476723	0.133512	0.133512	0.133512	0.133512	0.0295538	0.0912039	0.0924737
28	6.5015e-05	9.37102e-05	0.0025108	5.84421e-38	0.374941	0.0877395	0.000276035	5.39242e-07	0.0851872	0.00365551	0.00116808	0.000671505	0.0117164	0.0205191	3.31578e-05	0.3888	0.0025	0	0	0.5006	0	0	0.0006	0	0	0	0	0	0	0.1075				Forested wetland	0.0854382	0.0710136	0.0378119	0.0316362	0.140722	0.163093	0.00730502	0.0333664	0.159109	0.144858	0.15197	0.163093	0.0206851	0.0638348	0.0647235
29	0.00236414	0.000252766	0.00652328	1.90981e-20	0.245322	0.0602538	0.000341428	1.47619e-06	0.036657	0.00530148	0.0170858	0.00250852	0.0198984	0.0600138	0.00257049	0.0862	0.0344	0	0	0.6556	0	0	0.0025	0	0	0.0006	0	0.0312	0.0025	0.1869				Dry lichen	0.00425267	0.00425267	0.00425267	0.00425267	0.00425267	0.00425267	0.00425267	0.00425267	0.00425267	0.00425267	0.00425267	0.00425267	0.00425267	0.00425267	0.00425267
30	0.000103943	1.13631e-05	0.000942483	2.88236e-50	0.0989421	0.00205256	0.000455397	1.13559e-06	0.0866947	0.0302815	0.0119996	0.0176213	0.0424421	0.110336	5.46073e-07	0.01	0	0	0	0.4225	0	0	0.0569	0.0969	0.0219	0.0012	0.0156	0.0544	0.0388	0.2819				Dry lichen subsiding	0.0132412	0.0132412	0.0132412	0.0132412	0.0132412	0.0132412	0.0109051	0.0132412	0.0132412	0.0132412	0.0132412	0.0132412	0.0132412	0.0132412	0.0132412
31	7.103e-07	0.000229145	0.00616502	3.794e-52	0.0172128	0.0078504	0.0136498	0.0346088	0.030574	0.14275	0.0501665	0.395236	0.0153127	0.0276044	7.91594e-09	0	0	0	0	0	0.0025	0	0.0194	0.0731	0.0219	0.3169	0.4069	0.1212	0.0381	0				Willow wetland	0.0560439	0.0465819	0.0248031	0.020752	0.0923078	0.122183	0.00479179	0.021887	0.104369	0.0950209	0.0996858	0.113941	0.0135685	0.0418729	0.0424559
32	5.52059e-05	0.000223274	0.00487893	9.88807e-32	0.069758	0.102676	0.00257284	0.000170897	0.139725	0.0605831	0.497426	0.0149449	0.0129947	0.0422495	3.36736e-05	0	0	0	0	0.0625	0	0	0.165	0.0006	0.03	0.0469	0.1612	0.19	0.3438	0				Sphagnum wetland	0.0416302	0.0346017	0.0184241	0.0154149	0.0685675	0.0907591	0.00355941	0.016258	0.0775269	0.0705829	0.074048	0.0846371	0.0100789	0.0311038	0.0315369
33	0.184015	0.00022135	0.0366899	1.34607e-56	0.272615	0.00197297	0.000259062	0.000176607	0.0838985	0.0122966	5.30953e-05	0.00177862	0.00794514	0.00266887	2.78483e-09	0.9812	0	0	0	0.0188	0	0	0	0	0	0	0	0	0	0				Sedge / Eriophorum	0.0324306	0.0269553	0.0143526	0.0120085	0.0534152	0.0707028	0.00277283	0.0126652	0.0603946	0.0549852	0.0576846	0.0659336	0.00785163	0.0242304	0.0245677
34	0.638457	0.00299149	0.0529896	1.42777e-74	0.0772899	0.00136918	0.000217069	0.00230247	0.00390092	0.00744147	6.91449e-06	0.000242782	0.00276346	0.000359075	5.92782e-13	0.9835	0	0	0	0.0165	0	0	0	0	0	0	0	0	0	0				Moist moss	0.0823056	0.0720146	0.038345	0.0320822	0.0823056	0.0823056	0.007408	0.0338368	0.0823056	0.0823056	0.0823056	0.0823056	0.0209767	0.0647346	0.0656359
35	0.65942	0.00978917	0.0288098	1.25241e-84	0.0190465	0.00064985	0.000123711	0.00216217	0.000946498	0.0140943	1.379e-05	3.31445e-05	0.00143941	0.000198014	1.38235e-15	0.8894	0	0	0	0.0925	0	0	0	0	0	0	0	0	0	0.0181				Moist moss subsiding	0.0121412	0.0121412	0.0121412	0.0121412	0.0121412	0.0121412	0.00746697	0.0121412	0.0121412	0.0121412	0.0121412	0.0121412	0.0121412	0.0121412	0.0121412
36	0.000385292	0.000244538	0.00267279	1.76393e-30	0.061503	0.0669244	0.00135385	2.28212e-05	0.105632	0.0452615	0.475888	0.00936735	0.0179731	0.0648413	0.000106405	0	0	0	0	0.0531	0	0.0019	0.1462	0.0081	0.0525	0.0381	0.1512	0.0256	0.5106	0.0125				Dwarf shrub	0.0319884	0.0319884	0.0220366	0.0184374	0.0319884	0.0319884	0.00425733	0.0194458	0.0319884	0.0319884	0.0319884	0.0319884	0.0120552	0.0319884	0.0319884
37	0.000589237	0.00025847	0.00977973	1.61444e-17	0.218096	0.142763	0.000900711	8.99284e-06	0.0742708	0.0113303	0.0593832	0.00665883	0.0163935	0.0584691	0.00496822	0	0.0031	0	0	0.2675	0	0.0006	0.0019	0	0	0	0.005	0.0744	0	0.6475				Dwarf shrub subsiding	0.0230639	0.0230639	0.0230639	0.0230639	0.0230639	0.0230639	0.0230639	0.0230639	0.0230639	0.0230639	0.0230639	0.0230639	0.0230639	0.0230639	0.0230639
38	0.00302272	0.000940246	0.0225429	4.50729e-14	0.195407	0.384346	0.00119091	2.24799e-05	0.105686	0.013054	0.045358	0.00358403	0.00732831	0.0226359	0.00426153	0.0256	0.0012	0	0	0.1938	0	0	0.0006	0	0	0	0.0012	0.03	0	0.7475				Total	0.66896	0.60167	0.426851	0.391052	0.819872	0.911598	0.135524	0.402185	0.866259	0.830307	0.848248	0.892465	0.300744	0.566023	0.570436
39	0.00123064	0.00498667	0.00212944	3.68031e-47	0.00192377	0.00939266	0.0041936	0.00118073	0.0463363	0.606608	0.292735	0.0240505	0.00666109	0.0256891	1.83101e-09	0	0	0	0	0	0	0	0.1425	0.2031	0.44	0.015	0.1556	0.0169	0.0269	0				Producer accuracy	10.8277	9.17059	7.79804	0.884577	16.2845	14.6459	3.13794	3.29232	12.0482	8.50082	6.80044	9.22228	4.03704	5.65144	4.0432
40	0.00552231	0.000449386	0.00283051	9.68243e-35	0.0472768	0.0437683	0.00138877	6.00544e-05	0.140267	0.06632	0.486577	0.00970363	0.0182461	0.0455256	4.22846e-05	0	0.0056	0	0	0.005	0	0	0.19	0.1006	0.3312	0.01	0.0444	0.0019	0.3113	0
41	0.000164861	0.000241935	0.00485441	3.0421e-17	0.219693	0.135185	0.00076509	3.57342e-06	0.0526245	0.00795934	0.0578649	0.0064063	0.0214695	0.0852279	0.0125767	0	0	0	0	0.22	0	0.0012	0.0744	0.135	0.0144	0.0012	0.0325	0.125	0.0981	0.2981
42	0.00176155	0.000173207	0.00590862	1.04279e-25	0.13373	0.0114173	0.000432331	4.75936e-06	0.0477541	0.0185437	0.029425	0.00752386	0.0242143	0.0803695	0.000124994	0.005	0	0	0	0.7488	0	0	0.1088	0	0.0219	0.015	0.0031	0.015	0.0231	0.0594
43	0.000184577	0.000500749	0.0105674	1.2799e-22	0.11384	0.0464648	0.00132388	9.45591e-05	0.0815749	0.0415648	0.0638118	0.0117142	0.0135095	0.0463545	0.000119789	0.0056	0.0062	0	0	0.5594	0	0	0.0125	0	0	0.0125	0.0038	0.095	0.0425	0.2625
44	0.00522642	0.000206457	0.00241925	8.75746e-38	0.0676762	0.0432693	0.00105849	1.7266e-05	0.145409	0.0364305	0.266386	0.00837013	0.0195727	0.0431015	3.82818e-05	0	0.0038	0	0	0.0206	0	0	0.0612	0.1806	0.2412	0.0044	0.0344	0.0006	0.4512	0.0019
45	0.00463438	0.00024268	0.00879659	1.26532e-14	0.301476	0.090453	0.000298022	5.89876e-07	0.0374595	0.00419466	0.0118264	0.00220397	0.0195835	0.0709152	0.0143488	0	0	0	0	0.1386	0	0	0.0413	0.4602	0	0	0.0029	0.0973	0.1563	0.1032
46	0.272858	0.00901486	0.0176334	9.31214e-85	0.00271983	0.0413976	0.00143847	0.00337529	0.00119094	0.0405018	0.000939959	0.000173232	0.000716394	0.000228999	3.52275e-15	0.6514	0	0	0	0.3486	0	0	0	0	0	0	0	0	0	0
47	0.0619738	0.000274456	0.0191443	1.2774e-20	0.318602	0.0102859	0.000151021	1.93337e-06	0.0344487	0.00394247	0.00309883	0.00213596	0.0192764	0.0378806	0.000478844	0.6169	0	0	0	0.3831	0	0	0	0	0	0	0	0	0	0
48	0.00281629	0.00079812	0.00556838	1.06587e-19	0.326879	0.0961657	0.000230639	1.24056e-06	0.0292989	0.00247716	0.00462847	0.000838241	0.0158802	0.0340636	0.00563356	0.2788	0.0044	0	0	0.4456	0	0	0	0	0	0	0	0.0006	0	0.2706
49	0.000183608	0.00018843	0.00226652	6.00528e-18	0.304772	0.0988603	0.000321147	3.89711e-07	0.0236228	0.00156384	0.0283491	0.00344239	0.0318716	0.102299	0.0583359	0	0	0	0	0.2725	0	0.0025	0.0138	0.3075	0.0081	0.005	0.0031	0.0288	0.1194	0.2394
50	0.248662	0.00129865	0.0970052	3.3724e-10	0.361862	0.0351093	0.000352817	5.4067e-05	0.0564306	0.00660159	0.00479521	0.00356408	0.0113828	0.0190914	0.00324033	0.7747	0	0	0	0.2253	0	0	0	0	0	0	0	0	0	0
51	0.075496	0.000602887	0.0580451	6.36774e-17	0.162973	0.0270936	0.000346407	1.78759e-05	0.0161714	0.00913131	0.0144419	0.00246533	0.0101269	0.0275134	9.1421e-05	0.5256	0.0081	0	0	0.3781	0	0	0	0	0	0	0	0	0	0.0881
52	1.71651e-07	0.00413636	0.00179293	3.33053e-22	0.343611	0.0616363	0.000380823	2.1054e-05	0.126235	0.00573324	0.00109314	0.00112259	0.0081301	0.0146631	0.000405498	0.2812	0.0012	0	0	0.3875	0	0	0	0	0	0	0	0	0	0.33
53	3.1819e-12	0.00034533	4.83088e-05	8.60761e-56	0.330937	0.0152072	0.000392496	2.3233e-06	0.443613	0.0121595	3.18837e-05	0.00105278	0.00837671	0.0117843	9.47238e-08	0.0675	0	0	0	0.3962	0	0	0.0044	0	0	0	0	0.0212	0.0006	0.51
54	2.78119e-05	0.00036587	0.000981013	1.00769e-27	0.15509	0.211467	0.000678674	1.15293e-06	0.0246579	0.00369085	0.0387123	0.0027633	0.0213199	0.0660336	0.00357214	0	0	0	0	0.05	0	0	0	0.3638	0.0006	0	0	0.0006	0.0331	0.5519
55	0.00575736	3.68587e-05	0.005617	5.01268e-54	0.394678	0.00355804	0.00014142	2.39886e-06	0.16571	0.00616812	0.00021023	0.00103744	0.0139324	0.00906343	9.24871e-08	0.5606	0	0	0	0.4394	0	0	0	0	0	0	0	0	0	0
56	0.11742	0.000371152	0.0230154	6.88359e-69	0.178145	0.000792673	0.000289851	0.000606446	0.0459689	0.0138211	1.41908e-05	0.00193585	0.00749057	0.00152997	5.81213e-11	0.4369	0	0	0	0.5031	0	0	0	0	0	0	0	0.0006	0	0.0594
57	3.62701e-20	7.16217e-05	1.11297e-07	8.55358e-86	0.255763	0.0298603	0.000417363	2.60546e-09	0.500532	0.0186789	2.19921e-08	0.000280323	0.0072859	0.0239521	1.25059e-10	0.0062	0	0	0	0.3244	0	0	0.015	0.0669	0.0012	0	0.0012	0.025	0.0088	0.5512
58	0.000112011	0.000544043	0.00213097	4.53343e-24	0.276464	0.123354	0.000325067	9.91861e-07	0.0335094	0.00296158	0.00695056	0.0011137	0.0170849	0.0426639	0.00314145	0	0	0	0	0.0431	0	0	0.0019	0.573	0	0	0	0.0025	0.1148	0.2646
59	0.00701848	0.000289674	0.0128754	2.03289e-21	0.102788	0.0191347	0.000158917	9.83382e-07	0.00474467	0.00360106	0.0539587	0.000884564	0.0124967	0.0479709	3.40523e-05	0.9412	0	0	0	0.0588	0	0	0	0	0	0	0	0	0	0
60	0.0141485	0.000290752	0.0185182	8.70679e-26	0.352442	0.0309596	0.000197242	5.34971e-06	0.0716177	0.00439905	0.00726751	0.000872786	0.0108509	0.0163352	0.000106964	0.5059	0	0	0	0.4941	0	0	0	0	0	0	0	0	0	0
61	0.0624523	0.00051439	0.0122853	4.11977e-32	0.395115	0.00628283	0.000135911	9.38304e-06	0.0801702	0.00378727	0.000957759	0.00128874	0.0167914	0.0133979	5.19483e-05	0.4425	0	0	0	0.5575	0	0	0	0	0	0	0	0	0	0
62	0.0536685	0.000703075	0.0835568	1.27458e-18	0.0954807	0.0430617	0.00095459	0.00016066	0.0147965	0.0188583	0.0424004	0.00773976	0.00911509	0.025704	3.72927e-05	0.6506	0	0	0	0.3494	0	0	0	0	0	0	0	0	0	0
63	0.0375557	0.000771055	0.0673299	4.81282e-12	0.207849	0.102561	0.000679392	7.60875e-05	0.0559261	0.0121781	0.0986875	0.00350578	0.0088401	0.023333	0.00127159	0.5625	0	0	0	0.4375	0	0	0	0	0	0	0	0	0	0
64	0.0255965	0.00105582	0.0394734	4.9378e-11	0.195288	0.104211	0.000628213	3.92973e-05	0.0396683	0.00986818	0.0749954	0.00360724	0.0111552	0.0319311	0.00383689	0.545	0	0	0	0.455	0	0	0	0	0	0	0	0	0	0
65	0.000252058	0.0017671	0.00431832	8.27696e-21	0.405781	0.0389389	0.000250756	3.70743e-06	0.0891216	0.00542059	0.000323488	0.00137591	0.0145541	0.0253278	0.00210993	0.4381	0.0012	0	0	0.5044	0	0	0	0	0	0	0	0	0	0.0562
66	0.0357679	0.000276341	0.00902826	1.65351e-24	0.342345	0.0108761	0.000123051	1.81983e-06	0.0643176	0.00359373	0.0100653	0.00119315	0.0204599	0.0322395	0.000531698	0.3425	0	0	0	0.6575	0	0	0	0	0	0	0	0	0	0
67	0.00840956	0.0053211	0.031294	1.28043e-09	0.258245	0.0831716	0.000496894	0.000367764	0.081851	0.00762254	0.179994	0.00192298	0.0094743	0.0150716	0.00833859	0.2744	0	0	0	0.7256	0	0	0	0	0	0	0	0	0	0
68	1.41426e-05	0.00200412	0.00141207	7.86576e-25	0.39793	0.0513789	0.000258253	2.51807e-06	0.106607	0.00471366	0.000352764	0.00101763	0.0149327	0.0251969	0.00184001	0.3249	0	0	0	0.5361	0	0	0	0	0	0	0	0	0	0.139
69	0.178628	0.00270424	0.109046	4.75653e-60	0.0132468	0.323515	0.00481978	0.0071393	0.00228287	0.0138496	0.00247826	0.00250169	0.00117108	0.000607365	5.21223e-11	0.0682	0	0.2159	0	0.5682	0.1477	0	0	0	0	0	0	0	0	0
70	0.126155	0.00557011	0.174615	1.07339e-12	0.0820767	0.0278071	0.00194981	0.00587379	0.0130019	0.0259673	0.0169568	0.0354782	0.00958207	0.0179901	0.000135222	0.4467	0	0.0984	0	0.2541	0.2008	0	0	0	0	0	0	0	0	0
71	0.0196082	0.000128001	0.0122192	2.45001e-34	0.111245	0.0167052	0.000194161	1.31736e-06	0.0147603	0.00623457	0.0170742	0.00086315	0.0100547	0.024054	1.35412e-06	0.0042	0	0.0333	0.025	0.0083	0.1667	0	0	0.7125	0	0.0208	0	0	0.0208	0.0083
72	0.0257175	0.00934865	0.256217	0.0143354	0.171224	0.149479	0.00105076	0.00736082	0.052293	0.0158776	0.398702	0.00272719	0.00367385	0.00711694	0.000884439	1	0	0	0	0	0	0	0	0	0	0	0	0	0	0
73	0.177147	0.00633039	0.185605	2.72685e-12	0.0906951	0.0285502	0.0014646	0.00398258	0.0105646	0.018703	0.0140538	0.0214154	0.00868819	0.0153281	0.000126597	0.8425	0	0.0137	0	0.1301	0.0137	0	0	0	0	0	0	0	0	0
74	0.0427008	0.000286999	0.0789466	9.6857e-11	0.212626	0.0820454	0.000721941	2.32539e-05	0.0427392	0.0152437	0.0422506	0.00631427	0.0113702	0.0436412	0.00146344	0.0606	0	0.3875	0.025	0.1131	0.0394	0.0206	0.0019	0.2338	0	0.0288	0.0656	0.0038	0.0019	0.0181
75	0.00533395	0.000680372	0.0358579	1.48727e-14	0.126439	0.0966837	0.0011989	0.000128721	0.0571949	0.0270811	0.204049	0.00768667	0.0106734	0.0374287	0.000686495	0.0006	0.0006	0.0056	0.0019	0.0056	0.0275	0.0062	0.005	0.3331	0.0075	0.5244	0.0094	0.0031	0.0062	0.0631
76	0.0237295	0.00624669	0.151083	3.92886e-26	0.0248227	0.351175	0.00545433	0.00535422	0.00607011	0.016851	0.0247712	0.0161922	0.00239178	0.00395566	1.07657e-06	0.983	0	0.0038	0	0.0095	0	0.0019	0	0	0	0	0.0019	0	0	0
77	0.342648	0.0270962	0.123313	9.51367e-34	0.0266874	0.156225	0.00410516	0.0165185	0.00545357	0.0137515	0.00182245	0.014797	0.00291075	0.00194271	4.10951e-07	0.985	0	0.006	0	0.003	0.005	0	0	0	0	0	0.001	0	0	0
78	0.255795	0.0150868	0.15127	1.05917e-28	0.0145014	0.0840846	0.00710506	0.0406654	0.0264898	0.13033	0.020988	0.0429334	0.00308133	0.00439595	2.46687e-07	0.0619	0	0.3906	0.12	0.3306	0.0969	0	0	0	0	0	0	0	0	0
79	0.000182701	0.0023105	0.0345004	5.95607e-11	0.1548	0.0677716	0.00141894	0.00102343	0.0796314	0.0240799	0.14474	0.0119333	0.00912106	0.0252651	0.00100672	0.0012	0	0.2038	0.6375	0.035	0.1225	0	0	0	0	0	0	0	0	0
80	5.45217e-06	0.00319758	0.0255348	4.17817e-11	0.0505506	0.05208	0.00321123	0.00517412	0.124217	0.0959278	0.583022	0.0352346	0.00633555	0.0286623	8.34661e-05	0.0125	0	0.3775	0.0706	0.3956	0.1437	0	0	0	0	0	0	0	0	0
81	0.753859	0.0034804	0.105088	1.61177e-61	0.0198094	0.124148	0.00233769	0.00451494	0.0100186	0.0263098	0.000869472	0.00131067	0.00121861	0.000464426	3.2097e-11	0.9816	0	0.0046	0.0046	0.0074	0.0018	0	0	0	0	0	0	0	0	0
82	0.00100131	0.00201354	0.0997268	9.47073e-18	0.0426379	0.0496985	0.00484235	0.0134173	0.0516588	0.108019	0.187257	0.0609091	0.00620301	0.0193254	8.99139e-06	0.1	0	0.6506	0.0494	0.1719	0.0281	0	0	0	0	0	0	0	0	0
83	0.00103798	0.00067341	0.058205	3.53142e-16	0.0585077	0.0402877	0.00310183	0.00108534	0.0282424	0.0748389	0.110635	0.0541317	0.0115304	0.0521685	5.42641e-05	0.0006	0	0.3531	0.605	0.0081	0.0331	0	0	0	0	0	0	0	0	0
84	0.00167823	0.000635812	0.087835	2.43418e-10	0.135948	0.129793	0.00250774	0.000566791	0.0550432	0.03821	0.100657	0.0247635	0.00915367	0.0373844	0.000773876	0.0156	0	0.1775	0.1275	0.4612	0.1806	0	0	0.0294	0	0	0.0075	0.0006	0	0
85	1.29085e-05	0.00256196	0.0552971	1.45321e-07	0.0810701	0.0865339	0.00289983	0.00435436	0.0873387	0.0677166	0.402551	0.0228551	0.00556921	0.0258873	0.000167301	0.0662	0	0.0844	0.0462	0.3131	0.1625	0.01	0.0088	0.1712	0	0	0.1119	0.015	0.0056	0.005
86	1.34375e-06	0.0174953	0.0169413	2.91547e-08	0.0284598	0.0234911	0.00283952	0.0215192	0.088446	0.12369	0.756092	0.0322843	0.0058826	0.0261972	5.27736e-05	0	0.0025	0.0019	0	0	0.0038	0	0.0006	0.0019	0.0812	0.8988	0.0025	0.0025	0.0019	0.0025
87	0.00325784	0.00374885	0.135139	1.25684e-10	0.0542701	0.132964	0.00208827	0.0088146	0.0389165	0.0584725	0.854854	0.00501472	0.0038441	0.0130158	3.33483e-05	0	0.2125	0	0	0	0.0144	0.0006	0.0869	0.2219	0.0081	0.3412	0.0044	0.0131	0.0212	0.0756
88	4.49053e-06	0.0028561	0.0615901	8.01809e-10	0.0444523	0.0470875	0.00370805	0.0250825	0.0706004	0.100629	0.838522	0.0336451	0.00502543	0.0234895	2.10107e-05	0.0006	0.0069	0.0244	0.0412	0	0.025	0.0075	0.0894	0.5606	0.0256	0.0944	0.0056	0.0069	0.03	0.0819
89	2.91557e-05	0.00242841	0.0801075	1.92201e-07	0.0891763	0.0703176	0.00324983	0.0096712	0.0832363	0.0581046	0.422068	0.0361995	0.00616238	0.0237922	0.00020711	0.015	0	0.7262	0.0262	0.0825	0.0756	0	0	0.0625	0	0	0.0112	0.0006	0	0
90	5.68233e-06	0.00145139	0.0476394	6.87963e-09	0.0821608	0.0913283	0.00313368	0.00303815	0.0935953	0.0697958	0.452028	0.0264293	0.00590604	0.0305441	0.000134886	0	0	0.0012	0.0306	0.0588	0.1906	0.0131	0.0488	0.2556	0.0088	0	0.3438	0.0181	0.0294	0.0012
91	2.94222e-07	0.0230093	0.00766847	1.18193e-09	0.0147251	0.0194891	0.00359278	0.0171072	0.0655726	0.154394	0.823997	0.0538566	0.00672225	0.0372573	3.71954e-05	0	0	0.0019	0	0	0.0031	0	0.0019	0.0012	0.1956	0.7888	0.0038	0.0025	0.0012	0
92	0.0418842	0.000195546	0.0674714	6.2777e-29	0.0695693	0.0445363	0.000872822	0.000124979	0.0455195	0.0513771	0.264297	0.00261981	0.00571996	0.0171731	6.24125e-07	0	0	0.0369	0.0062	0.0025	0.0362	0.0006	0.01	0.2525	0.0019	0.6206	0.0012	0.0006	0.0019	0.0288
93	3.24918e-06	0.00171839	0.0368394	2.94837e-09	0.0732534	0.0660209	0.0027648	0.00262369	0.0811563	0.0767722	0.417679	0.0241166	0.0062352	0.0342307	9.32061e-05	0.0062	0.0169	0.0081	0.0025	0.0525	0.0325	0.0075	0.1281	0.0062	0.2256	0.3381	0.1569	0.0056	0.0062	0.0069
94	2.22639e-05	0.00100426	0.019524	3.42168e-19	0.0466158	0.0951258	0.00125232	0.000640258	0.100138	0.0756097	0.94354	0.00203004	0.00393582	0.0191525	4.38668e-06	0	0	0	0	0	0.0231	0	0	0.47	0.0006	0.4212	0	0	0.0488	0.0362
95	3.26341e-15	0.00761465	0.00114636	7.40704e-14	0.0166255	0.00132367	0.000926764	0.0099213	0.186267	0.109986	0.955537	0.0121743	0.00207469	0.0204747	1.32849e-08	0	0	0.0012	0	0	0	0	0.0038	0.0619	0.0038	0.9019	0	0	0.0012	0.0262
96	6.55277e-12	0.00751522	0.00316138	1.72628e-19	0.00876917	0.00212243	0.00259723	0.0322274	0.084445	0.184997	0.879655	0.0577813	0.00331124	0.0237659	1.68946e-08	0	0.0012	0.0019	0	0	0	0	0.0012	0.0019	0	0.9925	0	0	0	0.0012
97	3.87631e-09	0.00139478	0.00959678	1.13219e-13	0.0525183	0.0297512	0.00119075	0.00167513	0.280909	0.0982267	0.954213	0.00427054	0.00285081	0.0189743	1.71119e-06	0	0.0081	0	0	0	0.0088	0	0	0.0244	0	0.9525	0.0006	0	0	0.0056
98	4.58418e-09	0.00167703	0.0126274	2.91537e-34	0.0122786	0.00221515	0.00535448	0.102093	0.0486932	0.224011	0.289087	0.144531	0.00493351	0.0168818	1.65226e-09	0	0	0	0	0	0	0.0712	0.4238	0.0631	0	0.0012	0.2131	0.1275	0.0294	0.0706
99	8.45642e-07	0.00604914	0.0228104	3.48394e-12	0.0258519	0.0200208	0.0048725	0.0229038	0.0647081	0.149114	0.470233	0.101423	0.00697073	0.0344911	1.57717e-05	0	0.0006	0	0.0025	0.0012	0	0.08	0.0762	0.3869	0.0031	0.0044	0.36	0.0244	0.0469	0.0138
100	5.86023e-06	0.00169703	0.0337537	4.64717e-10	0.0871788	0.0845972	0.00352996	0.0068232	0.105143	0.0554801	0.699666	0.037488	0.00806887	0.0324579	0.000426087	0.0062	0.0019	0.0012	0.0012	0.0156	0.0825	0.0012	0.0869	0.4469	0.03	0.0031	0.0756	0.0025	0.1706	0.0744
101	2.00427e-19	0.0159384	7.41255e-05	4.40453e-19	0.00211569	8.69782e-05	0.00079216	0.00390842	0.134523	0.224213	0.977323	0.0390913	0.0019214	0.0408234	8.30554e-11	0	0.0494	0.03	0	0	0	0	0.0044	0	0.0194	0.8969	0	0	0	0
102	9.17183e-08	0.00523126	0.0193656	3.38702e-08	0.0735184	0.0515125	0.00193832	0.0110277	0.161076	0.05658	0.885619	0.0105055	0.00427272	0.0178511	6.63499e-05	0	0.0025	0.0038	0.0575	0.01	0.3462	0.0025	0.0669	0.2331	0.0544	0.015	0.0412	0.0031	0.1169	0.0469
103	1.654e-05	0.00274971	0.0167853	9.65835e-14	0.0726322	0.116929	0.00149478	0.000931541	0.112201	0.0491108	0.751467	0.00411219	0.00518506	0.0206361	0.000102781	0	0.0562	0	0.0012	0	0.2288	0.0006	0.0044	0.0706	0.0175	0.5888	0.0038	0.0006	0.0175	0.01
104	6.54589e-05	0.00242317	0.00228442	4.89851e-20	0.104967	0.446562	0.000676273	3.83553e-06	0.0087502	0.00398912	0.0863885	0.00070206	0.0102751	0.0379045	0.00307346	0.0006	0.0012	0.0119	0.0825	0.2988	0.52	0	0.0006	0.0131	0.0169	0.0438	0.0031	0.0006	0.0025	0.0044
105	0.449269	0.00347192	0.0362917	1.90363e-30	0.0385011	0.0804134	0.00128942	0.000197628	0.0693574	0.0510791	0.0212329	0.00413438	0.00439293	0.00703721	1.99949e-06	0.9228	0	0	0.0016	0.0312	0.0443	0	0	0	0	0	0	0	0	0
106	0.854785	0.005234	0.0589956	1.05928e-59	0.0141139	0.0857239	0.000905289	0.00061019	0.00636052	0.0243809	0.00203826	0.000263787	0.00111236	0.000573967	2.12595e-11	0.8027	0	0.0128	0.0332	0.0476	0.0757	0.0009	0	0.017	0	0	0.0102	0	0	0
107	0.0807259	0.000486307	0.0179466	2.27017e-35	0.0380919	0.0731504	0.000505446	7.57442e-06	0.0153257	0.0164782	0.0689891	0.000866824	0.00481279	0.0121603	3.15644e-07	0.0181	0	0.1694	0.1925	0.04	0.2494	0.0038	0.0006	0.2756	0	0	0.0456	0.005	0	0
108	0.000481288	0.00103747	0.00699461	8.06582e-20	0.085803	0.32075	0.000779019	1.44949e-05	0.0104822	0.00653222	0.457052	0.00108389	0.00945613	0.0360316	0.000726287	0.0012	0	0.1912	0.1594	0.2719	0.1619	0	0.0019	0.1638	0.0038	0	0.0044	0	0.0088	0.0319
109	1.3882e-06	0.00048607	0.019496	1.29322e-32	0.0247002	0.0138765	0.0115128	0.0376582	0.0363727	0.139336	0.1737	0.371777	0.0128142	0.0392682	4.74602e-07	0	0	0	0	0	0.0006	0.0088	0.0019	0.0444	0	0	0.9375	0.0069	0	0
110	2.11206e-05	0.000955817	0.0215528	3.0388e-25	0.0352971	0.0260045	0.0084653	0.016247	0.0427804	0.108698	0.185856	0.250719	0.0148399	0.046086	1.40548e-05	0	0	0.0012	0	0	0	0.0081	0.1756	0.0281	0.0112	0	0.755	0.0125	0.0081	0
111	1.11563e-05	0.00160443	0.0245639	5.25433e-21	0.0236861	0.0213631	0.00796275	0.0230656	0.0274404	0.13679	0.382511	0.219875	0.0129121	0.0531048	1.04035e-05	0.0006	0	0.0088	0	0	0	0.0025	0.2781	0.005	0.0525	0.0356	0.5662	0.0225	0.0212	0.0069
112	9.10627e-09	0.0107249	0.00762688	2.77462e-09	0.0214233	0.0193739	0.00309106	0.0247483	0.0512417	0.106537	0.947059	0.0350262	0.00639711	0.0399705	2.23126e-05	0	0.0006	0.0019	0	0	0.0488	0.0012	0.0881	0.2706	0.045	0.0094	0.3669	0.0156	0.1475	0.0044
113	0.549329	0.0135933	0.0723783	7.75617e-54	0.00626689	0.142694	0.00218077	0.00337167	0.00209842	0.0341615	0.00605742	0.000796552	0.0010798	0.000824254	4.44768e-11	0.2531	0	0.1112	0.5731	0.0181	0.0238	0	0	0.0156	0	0	0.005	0	0	0
114	0.000110191	0.00112961	0.00254979	1.60857e-19	0.122773	0.353184	0.000523258	2.70682e-06	0.00558058	0.00176078	0.222695	0.000916357	0.0141422	0.0481335	0.0069599	0.0006	0	0.1562	0.31	0.0681	0.2238	0.0006	0	0.2356	0	0	0.0038	0.0012	0	0
115	0.000146747	0.00861319	0.0109317	1.17471e-13	0.0704148	0.225143	0.000939155	0.000260666	0.0352243	0.0206267	0.534316	0.00107001	0.00525064	0.0176088	0.000373646	0.0012	0.0069	0.0069	0.1756	0.0788	0.4062	0.0056	0.0238	0.17	0.0169	0	0.0844	0.0031	0.015	0.0056
116	2.11491e-12	0.0236484	0.000785181	1.04137e-17	0.00831928	0.00922799	0.00268846	0.00389667	0.192334	0.202056	0.624455	0.0299096	0.00262297	0.0221382	1.5956e-07	0	0.36	0	0	0	0.0025	0	0.0488	0.0644	0.2044	0.0562	0.01	0	0.0644	0.1894
117	4.73336e-10	0.00934438	0.0022472	8.32327e-28	0.00447126	0.00272792	0.00417834	0.013825	0.128778	0.353672	0.480748	0.106558	0.00352525	0.0211743	5.9309e-09	0	0.0175	0.0144	0	0	0.0012	0	0.3031	0.0025	0.3881	0.0512	0.0169	0	0.0281	0.1769
118	1.55191e-13	0.0021231	0.000676909	2.41671e-33	0.00450692	0.00179641	0.00290719	0.00345295	0.221025	0.310436	0.726994	0.0602014	0.00228038	0.0203149	2.05226e-10	0	0.0075	0.0019	0	0	0	0	0.2775	0.0356	0.1806	0.1031	0.0275	0.0062	0.0162	0.3438
119	6.32212e-23	0.0974109	7.23437e-06	5.10579e-16	0.00177254	9.13371e-05	0.00044342	0.000833345	0.147305	0.156428	0.938333	0.0116473	0.00135387	0.0390768	1.20816e-10	0	0.0944	0	0	0	0.0044	0	0	0.0381	0.0219	0.8238	0	0.0006	0.0131	0.0038
120	7.50369e-09	0.00269412	0.0111402	3.31567e-28	0.00966601	0.00419123	0.00733227	0.103484	0.018528	0.186061	0.490433	0.212422	0.00720463	0.0323575	2.76843e-08	0	0.0012	0	0	0	0.0019	0.0012	0.3094	0.0606	0.0675	0.2244	0.0906	0.0231	0.0825	0.1375
121	1.82979e-05	0.00267114	0.00207341	2.16353e-25	0.0516314	0.378735	0.00124286	4.42212e-05	0.014537	0.0110749	0.582207	0.00114654	0.00845575	0.0295326	0.000242981	0	0.01	0.0006	0	0.0019	0.0681	0	0	0	0.0444	0.8719	0.0019	0.0006	0.0006	0
122	0.385837	0.010179	0.0494034	2.36507e-20	0.0458403	0.108602	0.00156925	0.000974798	0.0600647	0.0364637	0.0926385	0.00641245	0.00520866	0.00823467	5.95592e-05	0.9323	0	0.0203	0.0457	0.0017	0	0	0	0	0	0	0	0	0	0
123	0.0177069	0.00233966	0.0444673	4.76493e-14	0.0791579	0.0997172	0.000661728	0.000179938	0.0452272	0.0316027	0.538779	0.00120673	0.00532042	0.0178266	8.01772e-05	0.0881	0	0.385	0.0912	0.2156	0.1644	0	0	0.0444	0	0	0.0112	0	0	0
124	0.00182255	0.000570939	0.0187291	2.09543e-16	0.10918	0.146139	0.000837425	3.19877e-05	0.0296591	0.0154672	0.368529	0.00275676	0.00994049	0.0404815	0.000520813	0.1025	0	0.2569	0.0756	0.2319	0.075	0.0331	0.0012	0.1425	0	0	0.0544	0.0269	0	0
125	0.00343685	0.00434681	0.0364966	4.35828e-13	0.0511684	0.070267	0.0012615	0.00112377	0.0910626	0.062572	0.726291	0.00471311	0.00542902	0.0179727	8.01138e-05	0.0006	0.0394	0.0069	0.005	0.0175	0.13	0	0.0238	0.515	0.0531	0.0656	0.0031	0.0006	0.0788	0.0606
126	2.15536e-11	0.0091313	0.0041427	1.06473e-13	0.00637748	0.00355957	0.00351632	0.0174898	0.0489778	0.230627	0.837457	0.0911682	0.00365273	0.0398305	7.43961e-08	0	0.0188	0.0131	0	0	0.0025	0.0019	0.0562	0.0406	0.1019	0.5319	0.135	0.0075	0.03	0.0606
127	6.75283e-19	0.00193468	0.000125519	4.98104e-26	0.0107958	0.000489357	0.00110885	0.00202151	0.112984	0.107443	0.827325	0.0272483	0.00296772	0.043051	4.81391e-10	0	0.0094	0.005	0	0	0.0081	0	0.1275	0.0231	0.0881	0.5462	0.0206	0.0069	0.0462	0.1188
128	2.19773e-08	0.00235452	0.0103254	6.77451e-23	0.0177202	0.0135894	0.00926451	0.0645984	0.0240581	0.1129	0.557108	0.274705	0.0106732	0.0462347	2.07968e-06	0	0.0025	0.0012	0	0	0.005	0	0.0688	0.0131	0.5269	0.1038	0.0381	0.0031	0.2056	0.0319
129	1.65195e-11	0.00275193	0.00401475	1.32139e-19	0.0172379	0.00577155	0.00343285	0.0153826	0.0779247	0.143486	0.728565	0.0685251	0.00452176	0.033045	1.19139e-07	0	0	0	0	0	0.0062	0	0.02	0.0238	0.1456	0.655	0.0719	0.0006	0.0612	0.0156
130	7.87858e-08	0.000764302	0.00529856	3.72721e-39	0.012503	0.00546479	0.0105684	0.0299397	0.0313199	0.165726	0.140209	0.410963	0.0134929	0.0413566	5.34152e-08	0	0.0069	0.0012	0	0	0.0056	0	0.1988	0.0312	0.1281	0.0144	0.5044	0.0081	0.0788	0.0225
131	3.12622e-06	0.00575077	0.00212014	2.56539e-19	0.0601639	0.291542	0.00101177	7.16603e-05	0.0263187	0.0126497	0.590478	0.00107131	0.00698763	0.0262041	0.000461668	0	0.0206	0	0	0	0.0681	0	0	0.0012	0.0475	0.8606	0.0012	0	0.0006	0
132	1.68174e-05	0.00370955	0.00814783	1.78902e-17	0.0592198	0.194904	0.00125263	0.000530941	0.047426	0.0250057	0.878836	0.00171529	0.00562474	0.0198795	0.000126091	0	0.0088	0	0	0	0.0594	0	0.0025	0	0.0175	0.9106	0.0012	0	0	0
133	0.0144932	0.00517108	0.0365615	5.02398e-11	0.0800736	0.124882	0.000662126	0.000253206	0.030138	0.0222592	0.578262	0.00111502	0.00591409	0.0186836	0.000359964	0.0612	0	0.0444	0.1062	0.2388	0.5494	0	0	0	0	0	0	0	0	0
134	0.00109645	0.00198757	0.0153828	3.50849e-17	0.0930927	0.191807	0.000966067	0.000166378	0.0378165	0.0161255	0.610861	0.00183929	0.00766066	0.0227692	0.000453851	0.0944	0	0.3306	0.0138	0.1794	0.3294	0	0	0.0431	0	0	0.0094	0	0	0
135	1.30723e-07	0.00470306	0.018954	9.95186e-08	0.0886121	0.0515935	0.00181117	0.00445274	0.188201	0.0544789	0.609084	0.0121416	0.00441157	0.0189295	9.90768e-05	0.1488	0	0.2294	0.0081	0.5362	0.0731	0	0	0.0044	0	0	0	0	0	0
136	1.55321e-07	0.00396973	0.0205465	2.21339e-07	0.0643479	0.0409964	0.00192113	0.00558177	0.140634	0.0672945	0.819515	0.0142401	0.00470102	0.0238835	6.11484e-05	0.1231	0	0.2419	0.0056	0.6169	0.0119	0	0	0.0006	0	0	0	0	0	0
137	2.53181e-06	0.00112186	0.007009	1.68181e-20	0.0715152	0.167677	0.00189282	0.000309322	0.123741	0.0439289	0.645789	0.00510268	0.00603313	0.0251285	6.05533e-05	0	0.0044	0.005	0.0575	0.1044	0.2231	0.0462	0.0975	0.2344	0.0275	0.005	0.1631	0.0162	0.0131	0.0025
138	1.33118e-06	0.0721771	0.0141374	1.12427e-08	0.00549446	0.0248808	0.00496869	0.0208053	0.0454613	0.28577	0.545032	0.0573522	0.00329504	0.0226083	3.15316e-06	0	0.1412	0.0381	0.0006	0	0.0006	0	0.2275	0.0169	0.3244	0.1162	0.0044	0	0.0275	0.1025
139	5.8574e-06	0.000573411	0.0269814	1.8778e-40	0.01079	0.0227366	0.016219	0.0505135	0.0364666	0.259432	0.141552	0.274232	0.00633633	0.0187023	8.70801e-09	0	0	0.0006	0	0	0.0044	0.0112	0.1094	0.0169	0.0106	0.0006	0.8219	0.0044	0.0181	0.0019
140	2.89732e-10	0.00907107	0.00948523	1.54634e-14	0.0131905	0.00523597	0.00434595	0.101094	0.0302201	0.137608	0.831019	0.100943	0.00518042	0.0320381	3.87924e-07	0	0	0	0	0	0.0006	0.0006	0.2412	0.0375	0.0306	0.0031	0.4819	0.0206	0.1512	0.0325
141	1.35589e-10	0.00394709	0.004128	3.06567e-20	0.0153782	0.00424852	0.00447418	0.0328717	0.0449716	0.128238	0.647842	0.152122	0.00744178	0.0431033	4.17713e-07	0	0.005	0	0	0	0.0438	0	0.0269	0.0612	0.3113	0.2106	0.1256	0.0006	0.1781	0.0369
142	1.56041e-05	0.00257546	0.0360249	5.83412e-12	0.0452977	0.0320589	0.0041867	0.0096369	0.0737775	0.115636	0.417792	0.0782336	0.00866246	0.0389808	6.72358e-05	0	0.0056	0	0	0	0.0075	0	0.0619	0.025	0.1731	0.4969	0.1994	0	0.0275	0.0031
143	1.82235e-05	0.00458583	0.0651086	2.2386e-08	0.0504681	0.0327064	0.00373222	0.0362595	0.086417	0.109703	0.704605	0.0511528	0.00635583	0.024983	6.27571e-05	0	0.0006	0	0	0	0.0688	0	0.0206	0.0025	0.0744	0.8225	0.0094	0	0.0012	0
144	3.01913e-06	0.000320774	0.00993997	5.35974e-29	0.0240706	0.0143881	0.00714016	0.00459868	0.0381937	0.136723	0.408921	0.256841	0.018099	0.080468	3.42955e-06	0	0.0025	0	0	0	0.0481	0	0.0888	0.0031	0.2281	0.5156	0.1106	0.0012	0.0019	0
145	0.0247997	0.00104146	0.195132	8.49348e-10	0.152987	0.069391	0.00152552	0.00072748	0.0173956	0.0146715	0.0255346	0.0193852	0.00850961	0.0234863	0.000377746	0.0106	0	0.675	0.1106	0.1631	0.0406	0	0	0	0	0	0	0	0	0
146	5.19436e-07	0.0050723	0.049938	4.68066e-09	0.0546371	0.0362443	0.00313582	0.030972	0.0908824	0.0784132	0.646495	0.0303542	0.00414243	0.0168027	1.6256e-05	0.0262	0.0012	0.0131	0.0288	0.0856	0.0312	0.0956	0.0169	0.4212	0.0031	0	0.2388	0.0288	0.0094	0
147	7.20888e-08	0.00713256	0.0190471	2.68157e-16	0.0145972	0.0159411	0.00438067	0.0716795	0.0329231	0.155773	0.903576	0.0446207	0.0048019	0.0248247	7.44888e-07	0	0.0256	0.0144	0	0	0.1031	0.0069	0.1519	0.1181	0.1688	0.0206	0.2719	0	0.0969	0.0219
148	6.28933e-09	0.00195491	0.00623951	2.88355e-29	0.0120066	0.0059528	0.00737982	0.0343963	0.03765	0.172228	0.358056	0.237304	0.00822427	0.0364228	9.06212e-08	0	0.0006	0.0044	0	0	0.0112	0.0112	0.1575	0.0481	0.0631	0.0044	0.6369	0.0006	0.0519	0.01
149	8.06926e-08	0.00146205	0.00480936	2.27559e-33	0.00963172	0.0168794	0.00993704	0.0125369	0.0572118	0.215682	0.351731	0.219767	0.00802964	0.0347472	1.32446e-07	0	0.0006	0.0019	0	0	0.0112	0.0225	0.1406	0.0544	0.0062	0	0.7112	0.0019	0.0444	0.005
150	1.79737e-07	0.000379006	0.00519552	6.49221e-38	0.0200988	0.00917558	0.00841803	0.00948924	0.0644186	0.151651	0.199517	0.296365	0.0138507	0.0447114	1.95638e-07	0	0	0	0	0	0.0125	0.0106	0.0325	0.0575	0.0006	0	0.8725	0.0006	0.0131	0
151	2.27903e-06	0.00171215	0.00629276	6.79886e-42	0.00970511	0.00578514	0.0139916	0.058907	0.0216545	0.190204	0.0478095	0.508475	0.0159563	0.0353704	6.73823e-08	0	0.0006	0.0025	0	0	0.0012	0.0019	0.0819	0.0088	0.02	0	0.8406	0.0088	0.0325	0.0012
152	9.2023e-08	0.00160702	0.0313166	9.73313e-12	0.0963485	0.0583656	0.00221063	0.00696126	0.234717	0.0663325	0.73533	0.0124285	0.00356051	0.0150683	1.52889e-05	0	0.0019	0.0006	0	0	0.0706	0	0	0.0019	0.0619	0.8562	0	0	0.0056	0.0012
153	3.07045e-08	0.00256375	0.0213045	1.43134e-18	0.0170883	0.00757231	0.00582607	0.0577994	0.036188	0.167683	0.621638	0.163262	0.00665035	0.03578	4.57614e-07	0	0.0025	0	0	0	0.0281	0	0.0888	0.045	0.1412	0.0888	0.5106	0.0025	0.0725	0.02
154	4.04435e-05	0.00105905	0.0236166	5.46973e-32	0.0187382	0.0103389	0.0117794	0.0484948	0.0186831	0.160293	0.086508	0.431161	0.0170372	0.0464426	9.5475e-07	0	0.0019	0.0006	0	0	0.0025	0.0019	0.1125	0.0031	0.0762	0	0.7931	0.0006	0.0075	0
155	4.69884e-05	0.00346155	0.0189618	1.27364e-15	0.0571859	0.497361	0.00168816	0.0004819	0.0246001	0.023539	0.853094	0.000955791	0.00356856	0.0151899	9.21086e-05	0.0006	0.0044	0.0006	0.0206	0.03	0.5988	0	0.0012	0.035	0.0044	0.2888	0.0125	0	0.0031	0
156	1.21e-08	0.000606954	0.000634084	1.35425e-39	0.104013	0.364359	0.000860795	6.17805e-06	0.0374748	0.00859124	0.0354325	0.000369864	0.00463154	0.0145008	1.95422e-06	0	0.0081	0.0012	0	0	0.1894	0	0.0012	0	0.0338	0.7644	0.0012	0	0.0006	0
157	4.74091e-07	0.00722635	0.0260894	4.32316e-06	0.0586936	0.0326014	0.00245542	0.0109161	0.152156	0.0825328	0.608861	0.0290941	0.0050187	0.0224995	9.39213e-05	0.0012	0	0.0562	0.8288	0	0.1138	0	0	0	0	0	0	0	0	0
158	2.76456e-05	0.00118253	0.0479323	5.35009e-09	0.120002	0.15807	0.00264566	0.00159129	0.104457	0.0424015	0.471011	0.0164602	0.00648399	0.0278844	0.000585804	0.0562	0	0.0412	0.0094	0.3262	0.0612	0.0256	0.0081	0.2162	0.0006	0	0.245	0.0081	0.0019	0
159	1.66729e-05	0.00419697	0.0439493	4.27067e-11	0.0413225	0.0703239	0.00392745	0.0263252	0.0617914	0.0906685	0.89841	0.027265	0.00602269	0.0243264	6.12717e-05	0	0.0225	0.0094	0.0006	0	0.1038	0.015	0.1912	0.1581	0.0862	0.0012	0.2112	0.005	0.1431	0.0525
160	3.1385e-08	0.00105323	0.00269725	1.60329e-44	0.0101317	0.00322326	0.0103411	0.0437541	0.0181032	0.142199	0.102201	0.43012	0.0170811	0.0423615	2.22355e-08	0.0006	0	0.0038	0.0019	0	0.005	0.0169	0.0825	0.0356	0.0375	0	0.7875	0.0019	0.025	0.0019
161	3.89692e-07	0.00107945	0.00657814	1.06787e-45	0.00932922	0.00353667	0.0124423	0.0790351	0.0173434	0.195945	0.0502981	0.444258	0.0135803	0.0302084	6.66516e-09	0	0.0238	0	0.025	0	0.0038	0.0069	0.2081	0.0131	0.0325	0	0.6512	0.0019	0.0294	0.0044
162	2.30357e-10	0.00219429	0.00166875	3.05577e-37	0.0063559	0.00147871	0.00638909	0.0295536	0.0378593	0.19679	0.299105	0.321528	0.00916753	0.0382545	5.85418e-09	0	0.0031	0	0.0112	0	0.0075	0.0275	0.1744	0.0438	0.1275	0	0.5275	0.0025	0.0688	0.0062
163	7.15164e-10	0.00628792	0.0028267	2.16986e-31	0.00585332	0.00147659	0.0055716	0.0603036	0.032633	0.227468	0.353285	0.239233	0.00738657	0.0318997	9.96736e-09	0	0.0244	0.0006	0.0312	0	0.0038	0.0038	0.2319	0.0075	0.365	0	0.2894	0.0012	0.0069	0.0344
164	4.68414e-06	0.00154382	0.0203963	2.10025e-35	0.0124396	0.00787488	0.0103287	0.0731138	0.0371807	0.239558	0.130152	0.28114	0.0085316	0.0231678	3.68129e-08	0	0.0075	0.0288	0.0031	0	0.0012	0.0069	0.1744	0.0275	0.0675	0.0006	0.6481	0.0019	0.0231	0.0094
165	8.1965e-07	0.00144463	0.0247635	2.18112e-15	0.0386671	0.0211359	0.00514622	0.0146949	0.0723896	0.121285	0.545845	0.128332	0.00920191	0.044465	1.77924e-05	0	0.0069	0	0	0	0.0581	0.0019	0.0281	0.0544	0.0825	0.2544	0.4275	0.0012	0.0631	0.0219
166	3.87297e-06	0.000428642	0.00831546	1.16948e-43	0.0152175	0.00599909	0.0125821	0.0295044	0.0194127	0.159645	0.0530296	0.491052	0.0202203	0.0476083	7.40067e-08	0	0.0006	0	0	0	0.0081	0.0006	0.0212	0.0062	0.0781	0.0056	0.8562	0.0044	0.0144	0.0044
167	0.000183984	0.00224336	0.0164974	6.69727e-15	0.0269335	0.0241727	0.00325007	0.00240928	0.0363554	0.143282	0.625928	0.0575716	0.0146867	0.0785821	0.000103704	0	0.0106	0	0	0	0.015	0.0006	0.0162	0.0581	0.1331	0.6512	0.0769	0.0006	0.0344	0.0031
168	0.00279785	0.0107158	0.0142918	4.46886e-13	0.0952244	0.473444	0.000556375	0.000100417	0.0062934	0.0029186	0.668302	0.000289046	0.00556657	0.0129046	0.00252899	0.0035	0	0.0017	0	0.0155	0.5458	0	0.0017	0.0052	0.0225	0.3903	0	0	0.0104	0.0035
169	1.23965e-05	0.00356161	0.0346193	2.91329e-09	0.0722358	0.122687	0.00215541	0.00278521	0.0732294	0.0534178	0.65468	0.00808889	0.00492793	0.0218643	0.000143877	0.0012	0.0019	0.0025	0.1125	0.0738	0.4069	0.0194	0.0269	0.1594	0.02	0	0.1475	0.005	0.0231	0
170	0.000355014	0.001406	0.0395852	1.654e-13	0.0646977	0.123999	0.00219409	0.00121573	0.0647908	0.0622152	0.710964	0.00914056	0.00663033	0.0288135	0.000121846	0	0.0194	0.0131	0.07	0.1106	0.4244	0.0025	0.0169	0.2162	0.0312	0.0012	0.0275	0.0025	0.0512	0.0131
171	1.20231e-08	0.000439236	0.0106048	5.468e-45	0.0079064	0.00389968	0.0100256	0.0540515	0.0361596	0.27914	0.177327	0.244192	0.0053576	0.0186812	1.99998e-10	0	0	0.0562	0.0019	0	0.0344	0.0106	0.2131	0.0469	0.0994	0.0031	0.49	0.0094	0.0331	0.0019
172	1.65354e-09	0.000261731	0.000691795	9.961e-58	0.00624018	0.00230051	0.011466	0.0109792	0.0133382	0.14538	0.0861063	0.472447	0.0205682	0.0561213	1.02846e-09	0	0	0	0	0	0.0131	0.0156	0.0119	0.08	0.0044	0	0.8662	0.0012	0.0075	0
173	5.58748e-13	0.00710036	0.000762369	2.164e-27	0.00479532	0.000553418	0.00301324	0.0215565	0.0593508	0.210787	0.667625	0.172121	0.00563943	0.0396036	3.99016e-09	0	0.0038	0.0006	0.0056	0	0.0031	0.0062	0.1575	0.0306	0.2081	0	0.5069	0.0044	0.0612	0.0119
174	0.00015826	0.00386061	0.0211898	3.21694e-14	0.209696	0.562247	0.00072445	7.75599e-05	0.0380744	0.00513205	0.131077	0.000372322	0.00359744	0.00851874	0.000920414	0.0006	0.0038	0	0.01	0.0175	0.61	0	0	0.0025	0.005	0.35	0.0006	0	0	0
175	8.05968e-07	0.000769254	0.00109778	6.4046e-38	0.103687	0.519715	0.00101291	8.6226e-06	0.0156087	0.00447629	0.0615146	0.000469345	0.00637525	0.0155774	1.77986e-05	0	0.0088	0.0044	0.0056	0.0744	0.2838	0	0.0006	0.0006	0.0469	0.565	0.0075	0	0.0025	0
176	0.0031809	0.000880508	0.0925538	6.82729e-08	0.130455	0.228312	0.00207897	0.00044571	0.0533896	0.0335818	0.296603	0.00995535	0.00720938	0.0315821	0.00133274	0.0069	0	0.2262	0.0619	0.5638	0.1412	0	0	0	0	0	0	0	0	0
177	4.59797e-05	0.00133236	0.0166761	1.19789e-15	0.0583843	0.0907508	0.00226696	0.00104646	0.0796222	0.0660641	0.778707	0.0124308	0.00853997	0.0382641	0.000146312	0	0.0194	0.0006	0.0219	0.0062	0.3362	0.01	0.0906	0.0844	0.1106	0.005	0.2225	0.0031	0.0806	0.0088
178	2.36402e-07	0.0013079	0.0270406	1.51064e-32	0.0116531	0.00373841	0.00855226	0.110513	0.0267775	0.260015	0.174387	0.267552	0.00683728	0.0247155	7.28409e-09	0	0.0031	0.005	0	0	0.0125	0.0012	0.1638	0.0375	0.2856	0.0006	0.3438	0	0.135	0.0119
179	1.19134e-08	0.00110063	0.00627897	1.24251e-42	0.0105897	0.00187514	0.00829762	0.0849126	0.0302258	0.198004	0.0872621	0.3397	0.00925511	0.0242165	1.97232e-09	0	0.0006	0	0	0	0.0106	0.0056	0.1919	0.035	0.3019	0.0125	0.2712	0.0031	0.1538	0.0138
180	2.91051e-07	0.00302458	0.00504292	1.43853e-37	0.00687894	0.00405397	0.0104954	0.0579868	0.0178588	0.218413	0.134623	0.384789	0.0127479	0.038735	4.04231e-08	0	0.0012	0.0019	0.0006	0	0.0006	0.0012	0.2862	0.01	0.1694	0	0.5	0	0.0188	0.01
181	6.59089e-16	0.00132199	0.000966943	7.81521e-25	0.00871206	0.00065076	0.00164496	0.00863012	0.0708235	0.158644	0.917018	0.0409989	0.00276766	0.0348425	3.1093e-10	0	0.0344	0.0469	0	0	0.0131	0	0.0731	0.0044	0.2956	0.4438	0.0481	0.0006	0.03	0.01
182	2.03453e-11	0.00262827	0.00691299	3.74722e-14	0.033178	0.0094619	0.00228862	0.0109963	0.141802	0.101378	0.798381	0.0294531	0.00329077	0.0232166	3.92261e-07	0	0.0031	0.005	0	0	0.0731	0.0006	0.1094	0.0662	0.2506	0.1488	0.1662	0.0006	0.1675	0.0088
183	6.49245e-18	0.00495257	0.000226174	2.91913e-20	0.00864251	0.00120836	0.00121864	0.00240892	0.138741	0.134874	0.891869	0.0174813	0.00194052	0.0308536	1.24624e-09	0	0	0.0038	0	0	0.0181	0	0.1788	0.0119	0.2819	0.3119	0.0931	0.0006	0.08	0.02
184	7.18857e-07	0.00228593	0.014877	9.49724e-31	0.0106973	0.00559545	0.00871465	0.0604353	0.037723	0.246381	0.21096	0.286745	0.008447	0.0296137	6.45163e-08	0	0.0012	0.0012	0	0	0.0038	0	0.0331	0.0025	0.6838	0.0162	0.2469	0.0012	0.01	0
185	0.000132008	0.00394263	0.0867241	5.73927e-05	0.0886426	0.100278	0.00276677	0.00639592	0.0584675	0.049036	0.404693	0.0220376	0.00607278	0.0239131	0.000540934	0	0	0.0093	0.9442	0	0.0465	0	0	0	0	0	0	0	0	0
186	1.10198e-06	0.00132208	0.019393	1.07764e-11	0.0773876	0.0254045	0.00218992	0.00126926	0.105316	0.0883449	0.197427	0.034573	0.00853841	0.0472289	6.54786e-05	0.1425	0	0.05	0.0088	0.3562	0.0631	0.0044	0	0.0831	0	0	0.2875	0.0044	0	0
187	1.65903e-07	0.0048751	0.0100609	4.59803e-11	0.0343404	0.035658	0.00295828	0.00446015	0.129523	0.112465	0.737485	0.033165	0.0060216	0.034168	4.39755e-05	0.0156	0	0.0188	0.0012	0.0681	0.0625	0.0231	0.0012	0.2788	0.0019	0	0.5181	0.0106	0	0
188	4.5279e-11	0.00154847	0.00417723	1.43898e-30	0.0133639	0.00309541	0.00381146	0.0267816	0.0875258	0.181059	0.603157	0.0802003	0.00417797	0.0210698	4.22388e-09	0	0.0031	0.0119	0.0125	0	0.0138	0.0238	0.2562	0.0425	0.1038	0	0.5056	0.0062	0.0181	0.0025
189	8.91e-08	0.000747339	0.00291453	1.09139e-41	0.0155951	0.00348538	0.00914766	0.0269012	0.028391	0.120501	0.110908	0.464006	0.0216993	0.0522743	1.49686e-07	0.0006	0.0012	0	0	0.0094	0.0356	0.0044	0	0.0088	0.0056	0	0.9344	0	0	0
190	9.55857e-08	0.000785872	0.0116938	6.92822e-43	0.0116632	0.00288394	0.0091892	0.0817546	0.0399502	0.238037	0.0788343	0.309194	0.00780305	0.0198672	1.53906e-09	0	0.0006	0.0275	0	0	0	0	0.4719	0.0031	0.1512	0	0.3231	0	0.0194	0.0031
191	2.91614e-07	0.00161785	0.0152522	1.95242e-33	0.0147313	0.00438352	0.00901105	0.102186	0.0267083	0.183328	0.144426	0.326449	0.010266	0.029516	5.08932e-08	0	0.0081	0	0.0012	0	0	0.0012	0.3469	0.0062	0.1225	0.0019	0.4375	0	0.065	0.0094
192	4.55572e-10	0.0029606	0.0109588	1.49521e-13	0.0398803	0.0231787	0.0028467	0.012896	0.128742	0.0964599	0.781245	0.025268	0.00353752	0.0214202	1.68268e-06	0	0.0025	0.0006	0	0	0.0994	0.0019	0.0638	0.0644	0.1469	0.3988	0.055	0.0006	0.1212	0.045
193	9.53781e-15	0.000811277	0.000473259	1.25733e-24	0.0379888	0.0109919	0.00194501	0.000652398	0.356365	0.0846893	0.642735	0.021486	0.00353603	0.0306734	1.21571e-07	0	0.0019	0.0012	0.005	0	0.1244	0.0025	0.1138	0.1494	0.2044	0.11	0.09	0.0038	0.1488	0.045
194	3.05612e-06	0.000884753	0.0165442	2.00936e-28	0.0272794	0.0109322	0.00695866	0.0250985	0.0538741	0.137116	0.306122	0.227363	0.0125788	0.0388712	1.44445e-06	0	0.0106	0	0	0	0.0269	0.0012	0.0319	0.0312	0.2281	0.06	0.5681	0.0044	0.0325	0.005
195	9.40635e-06	0.00497533	0.0561356	9.35538e-06	0.0668814	0.0585329	0.00277475	0.00701441	0.071895	0.0670355	0.351107	0.0276302	0.00531157	0.024072	0.000142444	0.0012	0	0.0419	0.78	0	0.1769	0	0	0	0	0	0	0	0	0
196	3.94285e-09	0.0078158	0.00724687	1.17589e-07	0.0694186	0.0368123	0.00174531	0.00407076	0.216757	0.061688	0.653992	0.0128921	0.00437828	0.0219264	7.66536e-05	0.0006	0.0006	0.0094	0.005	0.1119	0.1219	0.045	0.0112	0.2438	0.0025	0	0.4425	0.0056	0	0
197	2.15901e-06	0.00375445	0.0218843	1.24558e-09	0.0582012	0.0614469	0.00272153	0.00401212	0.113842	0.0770914	0.596621	0.023422	0.00600562	0.0282722	0.000126592	0	0.0075	0.0031	0.0362	0.0456	0.2112	0.0331	0.035	0.3088	0.0444	0.0019	0.2331	0.0144	0.0244	0.0012
198	8.35198e-10	0.0028695	0.00604673	4.02637e-29	0.00930854	0.00256965	0.0055841	0.0536627	0.0482214	0.21517	0.418859	0.191189	0.00573802	0.026902	1.09497e-08	0	0.0006	0.0838	0.0025	0.0006	0.0244	0.0106	0.0988	0.0181	0.0931	0	0.6506	0.0138	0.0012	0.0019
199	8.01736e-06	0.000608363	0.0133819	1.05291e-44	0.015441	0.0069968	0.0120178	0.060289	0.0264692	0.184269	0.0563338	0.357534	0.0134629	0.0264562	2.07367e-08	0	0.0006	0.0075	0.0344	0.0019	0.0988	0.0144	0.0238	0.0181	0.0744	0	0.7231	0.0006	0.0025	0
200	3.67147e-09	0.000837368	0.00402627	2.94316e-44	0.0089058	0.00188793	0.00777188	0.0541058	0.0255718	0.190599	0.157195	0.296903	0.00954163	0.0284944	1.27464e-09	0	0.0538	0	0.0312	0	0.0769	0.0312	0.0831	0.1188	0.1069	0	0.4162	0.0069	0.0681	0.0069
201	1.04019e-08	0.00359129	0.0183384	1.98181e-09	0.0556193	0.0345941	0.00192093	0.0125153	0.161273	0.0741754	0.939025	0.0105362	0.00344554	0.017903	9.51077e-06	0	0.0012	0.0075	0	0	0.3113	0.0006	0.0038	0.0956	0.0725	0.4375	0.0088	0	0.0431	0.0181
202	2.31523e-07	0.00375994	0.0220356	1.49024e-09	0.059586	0.0539159	0.00282412	0.0129285	0.115857	0.0696249	0.863313	0.0212657	0.00533916	0.0240677	6.834e-05	0	0.0131	0.015	0.0031	0	0.2694	0.0006	0.0069	0.2288	0.0369	0.3575	0.0212	0.0006	0.0294	0.0175
203	2.8916e-05	0.00189708	0.0505237	8.1856e-12	0.0597485	0.218909	0.00309524	0.00498737	0.0641351	0.0574045	0.908806	0.00804718	0.00435875	0.019492	7.39488e-05	0	0.0106	0	0.0281	0.0031	0.4725	0	0.0056	0.1781	0.0544	0.1444	0.0144	0	0.0712	0.0175
204	0.000216837	0.00263686	0.0061404	1.67789e-20	0.145944	0.382479	0.000605392	1.6891e-05	0.0156465	0.00437806	0.0890519	0.000504637	0.00719351	0.0184418	0.000868505	0	0	0	0.035	0.0331	0.8462	0	0	0.0569	0.0006	0.0231	0	0	0	0.005
205	0.0143331	0.000412445	0.0527436	3.02165e-10	0.236484	0.160221	0.000969287	3.22913e-05	0.0406544	0.009982	0.0515573	0.00762699	0.0127367	0.0434871	0.0078348	0.0089	0	0.1419	0.5605	0.0024	0.2863	0	0	0	0	0	0	0	0	0
206	6.51562e-09	0.000203599	0.00532278	2.48605e-45	0.0101581	0.00751156	0.0105177	0.013572	0.0593784	0.222696	0.262593	0.267725	0.0069722	0.0271654	1.33249e-09	0	0.0006	0	0	0	0.0169	0.0019	0.1212	0.0562	0.4225	0.0225	0.1194	0.0012	0.1881	0.0494
207	2.645e-08	0.00181928	0.0113014	3.39927e-18	0.0445629	0.0157028	0.00412415	0.0180464	0.133798	0.0990539	0.618423	0.0921516	0.00774388	0.0314072	7.81986e-06	0	0.0012	0.0006	0	0	0.005	0.0006	0.0881	0.0412	0.485	0.1919	0.0519	0.0006	0.0912	0.0425
208	0.0454573	0.0011412	0.0641942	3.42289e-13	0.192417	0.169513	0.000608706	9.00424e-05	0.0592575	0.0123264	0.214399	0.0013225	0.00639056	0.0157238	0.000705397	0.0175	0.0144	0.0638	0.0275	0.0094	0.3063	0	0.0062	0.1175	0.0519	0.3525	0.0044	0.0006	0.0262	0.0019
209	0.00600695	0.0025087	0.0117823	6.95451e-21	0.0545681	0.343704	0.00102887	3.40705e-05	0.0827075	0.0232263	0.430073	0.00125514	0.00429574	0.0131585	0.000112452	0.288	0.0006	0.0304	0.0101	0.0038	0.5025	0.0006	0.0019	0.1108	0.0266	0.0013	0.019	0.0019	0.0006	0.0019
210	0.00318846	0.000684876	0.0883645	1.50409e-08	0.201156	0.181062	0.00163909	0.000139762	0.0500309	0.0208785	0.0262389	0.0120219	0.00847193	0.0328626	0.00208824	0.1244	0	0.1619	0.0088	0.6431	0.0606	0	0	0	0	0	0.0012	0	0	0
211	4.13206e-05	0.00126458	0.061495	3.39499e-08	0.108704	0.114654	0.00307679	0.0014874	0.0814161	0.0571706	0.15552	0.0294375	0.00694096	0.0334605	0.000403032	0.0831	0	0.0044	0.0038	0.3444	0.0906	0.0338	0.0062	0.1525	0.0006	0	0.2731	0.0075	0	0
212	3.48617e-08	0.000679692	0.0104574	2.55871e-25	0.0338978	0.0119582	0.005245	0.0128604	0.109401	0.130066	0.493683	0.140896	0.00869362	0.0364574	1.03851e-06	0	0.0006	0	0	0	0.0081	0.0056	0.0869	0.1806	0.2331	0.0138	0.1388	0.0031	0.2731	0.0562
213	3.15675e-07	0.00135142	0.010926	1.62952e-20	0.0380816	0.0252028	0.00504852	0.00867796	0.104204	0.111309	0.52196	0.105547	0.00954545	0.0398155	1.31924e-05	0	0.005	0	0	0	0.1638	0.0019	0.0231	0.2769	0.1019	0.1788	0.1031	0	0.1188	0.0269
214	2.45457e-06	0.00355302	0.0128836	6.48512e-10	0.0840335	0.115156	0.00161702	0.000741616	0.116812	0.0474426	0.561345	0.00613457	0.00576872	0.0272086	0.000342635	0.0025	0	0.1819	0.3212	0.0794	0.415	0	0	0	0	0	0	0	0	0
215	0.00624286	0.000721027	0.0961942	1.28158e-08	0.203878	0.148732	0.0017676	0.000361878	0.0700966	0.0216052	0.0795156	0.0162439	0.00958876	0.0308252	0.00324763	0.0538	0	0.1638	0.0406	0.6131	0.1288	0	0	0	0	0	0	0	0	0
216	1.52352e-08	0.00455316	0.00789183	4.50992e-23	0.0191011	0.006732	0.00632879	0.0918801	0.0352748	0.108563	0.548462	0.210688	0.0102266	0.0354642	1.51111e-06	0	0	0	0	0.0344	0.1675	0.01	0.0019	0.2388	0.0006	0	0.5462	0.0006	0	0
217	3.66967e-09	0.000589589	0.0101879	1.51962e-34	0.0155676	0.00695872	0.00599626	0.024922	0.10639	0.213473	0.465094	0.116369	0.00437798	0.018235	4.35936e-09	0	0.0069	0.0006	0.0025	0	0.035	0	0.0094	0.0338	0.7	0.0631	0.0344	0	0.1088	0.0056
218	0.00175335	0.00143335	0.0523869	8.51306e-10	0.0959445	0.142145	0.00172711	0.000526302	0.0551294	0.0413813	0.446974	0.00813542	0.00767792	0.0325829	0.000675585	0.0075	0.0038	0.0131	0.1138	0.0656	0.5094	0.0106	0.0219	0.1194	0.0175	0	0.1169	0	0.0006	0
219	4.73696e-06	0.000672102	0.0133136	3.03355e-20	0.0322363	0.059605	0.00307329	0.0012121	0.0787634	0.141293	0.851832	0.0183254	0.0073491	0.0461747	7.65931e-06	0	0.0062	0.0038	0.0212	0.0031	0.4712	0.0069	0.0175	0.2431	0.01	0	0.1919	0.0038	0.0188	0.0025
220	9.27739e-06	0.000261419	0.0254478	9.88818e-32	0.0332623	0.019132	0.00728943	0.00960647	0.0785395	0.168437	0.244113	0.170833	0.0101882	0.0349951	4.62668e-07	0	0.0012	0	0.0006	0.0194	0.3494	0.0031	0.0075	0.1	0.0119	0	0.5019	0	0.005	0
221	0.109119	0.0150521	0.0960456	3.78837e-17	0.0150746	0.160368	0.00383755	0.00370416	0.0165072	0.0796835	0.149875	0.0151022	0.00339681	0.00999737	7.16019e-06	0.447	0	0.0501	0.0092	0.0127	0.1829	0.0056	0.0141	0.1794	0.0268	0	0.0424	0.0042	0.0177	0.0078
222	0.380639	0.0345501	0.0600597	2.56751e-25	0.0113025	0.0907231	0.00247325	0.00302953	0.00748038	0.0539563	0.0361805	0.00737133	0.00341192	0.00614884	9.69967e-07	0.6207	0	0.0427	0.0149	0.0169	0.1778	0.003	0.004	0.0199	0.0457	0	0.0536	0	0	0.001
223	0.0116339	0.00634248	0.121779	1.18799e-16	0.013049	0.21546	0.00802654	0.00771863	0.0175583	0.124462	0.234132	0.0435118	0.00338107	0.0140564	4.73801e-06	0.355	0.0006	0.0169	0.0419	0.0519	0.3162	0.0031	0.0225	0.1388	0.0206	0	0.02	0.0031	0.0088	0.0006
224	0.000568303	0.0085161	0.0146841	2.06438e-10	0.134861	0.270895	0.000779923	0.000227981	0.0361325	0.00845149	0.398246	0.00115578	0.00673624	0.0166657	0.0047377	0.0019	0	0.0331	0.0288	0.4106	0.4662	0.0012	0.0006	0.0406	0.0006	0	0.0162	0	0	0
225	0.00536755	0.00235696	0.0641681	1.51683e-19	0.0153567	0.0648237	0.00432822	0.00358128	0.0539031	0.238148	0.555715	0.0275121	0.00464414	0.0225776	1.80203e-06	0.0019	0.0644	0.0062	0.0025	0.0081	0.27	0.0031	0.06	0.0281	0.0969	0	0.4412	0	0.0175	0
226	0.443706	0.0206329	0.0374914	2.59447e-19	0.0258635	0.0677903	0.00110968	0.000532476	0.0378417	0.0502655	0.0966556	0.00372649	0.00453597	0.00907307	1.9571e-05	0.5857	0	0.0286	0	0.1143	0.2429	0	0	0	0	0	0.0286	0	0	0
227	0.00283456	0.000516439	0.0593746	8.36497e-12	0.20678	0.171645	0.00130639	0.000123425	0.0670076	0.0177818	0.0940983	0.00740419	0.00892548	0.0300445	0.00161605	0.0023	0	0.1318	0.4205	0.0068	0.4386	0	0	0	0	0	0	0	0	0
228	0.173643	0.0081192	0.0261087	8.2273e-27	0.0183705	0.0417773	0.000740556	0.000128298	0.00518244	0.0246309	0.0530722	0.00198546	0.0050454	0.0118907	1.0372e-06	0.8594	0	0.026	0	0.0781	0.0365	0	0	0	0	0	0	0	0	0
229	6.53177e-05	0.000317966	0.00203346	8.42882e-30	0.0590713	0.13462	0.00123198	1.18237e-05	0.0467926	0.0265105	0.441739	0.00424464	0.0144931	0.0610119	0.000102444	0	0.019	0	0.0451	0.2078	0.0724	0	0	0.0618	0.1057	0.0998	0.0083	0	0.2043	0.1758
230	4.90306e-23	0.405355	5.63554e-08	2.97499e-35	0.0139772	0.00102558	0.000171443	2.83849e-08	0.153796	0.094932	1.13046e-07	0.000618488	0.00313499	0.0600124	6.38002e-09	0	0	0	0.0033	0.3079	0.1821	0	0	0.2417	0.1026	0	0	0.0033	0.1457	0.0132
231	2.22043e-20	0.375332	2.61108e-07	7.66046e-31	0.0223907	0.0015945	0.000139547	4.57108e-08	0.1371	0.0539318	2.5984e-07	0.000475387	0.00326482	0.0435469	4.51117e-08	0	0.0058	0	0	0.1272	0.052	0	0	0.3468	0.1445	0	0	0	0.3064	0.0173
232	1.09146e-07	0.00665166	8.5886e-05	8.1581e-35	0.0869699	0.528264	0.000803719	7.4623e-08	0.151995	0.0263326	4.16572e-05	0.000458645	0.00559283	0.0243714	0.000108184	0.0013	0	0	0.0053	0.2426	0.263	0	0	0.0138	0.1795	0.0145	0.0138	0	0.1026	0.1637
233	1.82086e-06	0.000950308	0.000823953	5.99732e-31	0.0469781	0.597863	0.00155237	2.39173e-06	0.060055	0.025076	0.124951	0.00101051	0.00548345	0.0296439	4.76964e-05	0	0.0053	0	0.0099	0.2689	0.1078	0	0	0.1368	0.1295	0.0072	0.0296	0	0.2498	0.0552
234	4.56763e-07	0.000580393	0.00145735	8.92828e-32	0.0470584	0.477822	0.00337912	2.73841e-05	0.138575	0.0605247	0.21626	0.00464396	0.00575015	0.0295988	1.98833e-05	0	0.002	0	0.0131	0.5437	0.0171	0	0	0.142	0.1473	0	0	0	0.1328	0.002
235	2.00679e-07	0.00710337	0.000860081	3.4901e-21	0.0146554	0.111269	0.00130312	2.43792e-05	0.225876	0.187597	0.525805	0.00201911	0.00345655	0.0298276	5.04181e-06	0	1	0	0	0	0	0	0	0	0	0	0	0	0	0
236	1.45076e-31	0.0331407	5.04259e-13	2.46264e-106	0.305603	0.971398	0.00171681	1.75028e-17	0.255449	0.0987885	7.99721e-24	3.30602e-05	0.00674189	0.19049	6.33952e-09	0	0	0	0	0.8639	0.096	0	0	0.027	0.0026	0.0013	0	0	0.0039	0.0053
237	1.31902e-14	0.00645752	0.000127163	1.5617e-25	0.00760185	0.00795288	0.00170121	0.000184326	0.31983	0.235796	0.545364	0.0124235	0.00239365	0.0314942	1.69958e-08	0.0007	0.0046	0	0	0	0.0039	0	0	0.1111	0.6667	0.2097	0.0026	0.0007	0	0
238	1.2406e-11	0.00339684	0.000359168	1.5348e-31	0.00646687	0.00975421	0.00235129	0.000337447	0.267593	0.310419	0.584021	0.017115	0.00304641	0.0279949	9.83992e-09	0.0066	0.0085	0	0	0	0.0105	0	0	0.119	0.2275	0.6252	0.0026	0	0	0
239	4.39063e-08	0.00655229	0.000362709	1.64523e-25	0.01902	0.116142	0.000968473	7.64274e-06	0.279493	0.146858	0.259522	0.00111863	0.00350948	0.0268814	3.76784e-06	0	0.0033	0	0	0	0.2472	0	0	0.1801	0.0033	0.5661	0	0	0	0
240	5.66954e-06	0.00490758	0.00112586	4.19854e-26	0.0183684	0.381251	0.00201687	3.24326e-05	0.112465	0.0754795	0.656087	0.00191441	0.00434959	0.0233435	2.69955e-05	0	0.0151	0.002	0	0	0.3899	0	0	0.023	0	0.568	0.0007	0	0.0013	0
241	1.32866e-10	0.000680159	0.000691353	5.38392e-38	0.00938513	0.0125237	0.00374005	0.000523593	0.336781	0.268413	0.592043	0.0433638	0.00400008	0.0260115	8.08357e-09	0	0.0112	0.0112	0	0	0.4045	0	0	0	0	0	0	0	0.573	0
242	4.61145e-14	0.0223026	3.61055e-05	2.59071e-24	0.011616	0.0226391	0.000795904	7.07414e-06	0.359596	0.232714	0.053592	0.00146152	0.00230131	0.03373	1.45804e-07	0.0007	0.0585	0	0.002	0	0.2696	0	0	0.4629	0.0079	0.1972	0	0	0.0013	0
243	5.01687e-05	0.00513181	0.00260899	8.63402e-21	0.0339392	0.456531	0.00137317	1.51242e-05	0.0992518	0.0410839	0.334236	0.00120395	0.00390256	0.0190842	0.000116009	0	0.0204	0.0046	0.0066	0.0079	0.7659	0	0	0.0677	0.0007	0.1249	0	0	0.0007	0.0007
244	1.61383e-08	0.00113599	0.00100423	7.63395e-32	0.0125424	0.063968	0.00350508	0.000189371	0.303742	0.242203	0.704968	0.0160937	0.00437766	0.0302288	3.25154e-07	0.0133	0.0113	0.0625	0.0007	0	0.5824	0.01	0.0013	0.2793	0	0.0146	0.0027	0	0.0219	0
245	1.53095e-07	0.00155265	0.000229001	6.97472e-40	0.0113873	0.00643974	0.00100294	1.17952e-05	0.392315	0.36549	0.0927281	0.00690459	0.0074234	0.0439771	5.61455e-08	0.0222	0.0056	0.0056	0	0	0.0056	0	0	0.6167	0	0	0.0111	0	0.3333	0
246	1.40696e-05	0.000430886	0.000936017	3.39218e-25	0.18385	0.103519	0.000439259	5.31547e-07	0.0397708	0.00784297	0.00759613	0.00178627	0.0201155	0.0800503	0.00175796	0	0.002	0	0.0026	0.2479	0.1788	0	0	0.1098	0.0664	0.0434	0.0263	0	0.2321	0.0907
247	9.39981e-14	0.017364	4.96472e-05	1.28939e-23	0.0120271	0.0121923	0.000663826	1.01474e-05	0.424811	0.244327	0.108346	0.0016813	0.00239184	0.0330674	1.04629e-07	0	0	0	0	0.0953	0.025	0.0007	0	0.3899	0.3182	0.0684	0.0066	0	0.0901	0.0059
248	4.02608e-18	0.0384657	1.27472e-06	2.5789e-32	0.0175951	0.00196327	0.000285738	1.62546e-07	0.509824	0.255977	4.45317e-05	0.00126567	0.00356486	0.0623833	2.05324e-08	0.002	0.0706	0.0053	0.0007	0	0.2112	0.0007	0	0.6802	0	0.0193	0.0013	0	0.006	0.0027
249	1.76473e-23	0.168713	9.62943e-08	3.88034e-31	0.014925	0.000430913	0.000358251	1.7218e-07	0.286302	0.134313	7.88083e-07	0.00782418	0.00552717	0.114513	2.99174e-08	0	0.3526	0	0.0274	0	0.3916	0	0	0.1705	0	0.0074	0.0011	0	0.0137	0.0358
250	4.58719e-15	0.0786871	2.7815e-05	2.3837e-17	0.00651536	7.72622e-05	0.000347803	4.82392e-05	0.259411	0.315957	0.0105647	0.024426	0.00623354	0.0847896	4.22245e-08	0	0.4224	0	0.0086	0	0.1466	0	0	0.069	0	0	0.0086	0	0.3448	0
251	7.43466e-43	0.207224	2.81275e-16	5.58836e-126	0.164408	0.864814	0.00145329	1.01487e-19	0.0567234	0.0570164	1.45307e-28	4.26709e-05	0.00890604	0.418291	3.97584e-11	0	0	0	0	0	0	0	0	0	0	0	0	0	1	0
252	6.1143e-11	0.00314727	1.99232e-05	1.34236e-33	0.337005	0.00132963	6.11906e-05	2.99179e-08	0.528259	0.0433386	1.50854e-06	0.000369123	0.0162711	0.0648366	1.0196e-05	0	0.1486	0	0	0.4504	0.1506	0	0	0.0888	0.0263	0.0454	0.0007	0	0.0237	0.0657
253	2.26297e-25	0.550213	1.78796e-09	1.30022e-46	0.0948465	0.010839	0.000227564	6.71272e-11	0.0188272	0.00322536	9.25993e-14	0.00139797	0.0114902	0.109794	4.11813e-06	0	0.3509	0	0	0.4432	0.1395	0	0	0.0663	0	0	0	0	0	0
254	1.81121e-06	0.00680563	0.000993559	3.50001e-23	0.0178	0.214903	0.00155754	1.48396e-05	0.157925	0.138795	0.228561	0.00197013	0.00393179	0.0284373	1.3048e-05	0.0072	0.002	0.0151	0	0.0197	0.3682	0.0007	0	0.3932	0.0671	0.119	0.0007	0	0.0039	0.0033
255	1.73283e-18	0.0167885	7.19088e-06	4.73132e-27	0.0108432	0.00423828	0.000577365	5.71314e-06	0.495362	0.208488	0.036932	0.00225971	0.00196514	0.0376181	8.41302e-09	0.0013	0.0112	0	0	0.0007	0.0907	0	0	0.7442	0.1078	0.0362	0	0.0013	0.0066	0
256	6.86527e-16	0.00133496	0.000153216	9.08479e-35	0.00483817	0.00144627	0.00207675	0.00058581	0.29391	0.266176	0.710126	0.0428345	0.00234071	0.0291112	1.53579e-10	0.0335	0.0513	0	0	0	0.0099	0.0007	0	0.0237	0.4878	0.3406	0.0506	0.002	0	0
257	1.25504e-19	0.00288986	1.72161e-05	3.87146e-30	0.00461472	0.000283068	0.000741652	0.000105209	0.419882	0.225305	0.745475	0.0217697	0.00233709	0.0465246	1.29791e-10	0.046	0.0506	0	0	0	0.0184	0	0	0.1828	0.4188	0.2696	0.0138	0	0	0
258	1.67722e-09	0.00388064	0.00311621	3.81328e-23	0.011752	0.0644202	0.00461265	0.00135573	0.208011	0.233008	0.522678	0.0233079	0.00240042	0.0184937	1.89855e-07	0.0092	0.0493	0.0039	0.0072	0	0.092	0.0007	0	0.3853	0.1506	0.2742	0.0224	0.0033	0	0.002
259	2.65363e-13	0.00119632	0.000683208	7.71836e-26	0.00839478	0.016019	0.00312366	0.000483274	0.236515	0.240101	0.835058	0.025758	0.00234871	0.0326933	1.10086e-08	0.0454	0.0855	0.0401	0.0138	0	0.0914	0.0026	0.0007	0.0697	0.1815	0.3412	0.1236	0.0039	0	0.0007
260	2.86402e-16	0.000171098	1.79878e-05	4.94322e-51	0.0105366	0.00944769	0.00311957	1.51063e-05	0.448395	0.176098	0.117551	0.0392299	0.00468467	0.047222	7.63483e-10	0.0079	0.025	0.2584	0	0	0.2032	0.0099	0.0066	0.4878	0	0	0.0007	0	0	0.0007
261	1.50565e-25	0.292489	4.09729e-09	7.54789e-50	0.0269607	0.0171284	0.000460652	3.71995e-10	0.0936253	0.0686398	1.65069e-11	0.000669344	0.00405028	0.090505	1.42992e-08	0.0011	0.0785	0.0885	0.0011	0.0055	0.594	0.0022	0	0.0885	0	0.0011	0.0664	0	0.0675	0.0055
262	4.08667e-24	0.160002	6.53738e-09	1.75454e-46	0.371956	0.000906295	7.38917e-05	1.18011e-10	0.0845932	0.00759707	4.75847e-14	0.000694615	0.0202157	0.142194	2.19918e-06	0	0.6685	0	0	0	0.2965	0	0	0.0271	0.0011	0.0068	0	0	0	0
263	1.95197e-07	0.00069573	0.00152242	5.47199e-30	0.0464989	0.407709	0.00210663	2.42334e-05	0.153242	0.049002	0.441389	0.00211551	0.00425408	0.0224687	9.29499e-06	0.0007	0.0013	0.0178	0.0112	0.0756	0.8001	0	0	0.0861	0	0.0053	0	0	0	0.002
264	3.54723e-12	0.000825522	0.000247676	2.31345e-37	0.00659707	0.01921	0.00333518	9.46999e-05	0.261315	0.313529	0.457551	0.0220352	0.00326395	0.0366507	4.45974e-09	0.0085	0.027	0.1012	0	0	0.0184	0.142	0.0039	0.3905	0.0007	0.0013	0.3051	0	0	0.0013
265	1.38751e-08	0.00246984	0.000273745	6.58827e-34	0.0275194	0.0110636	0.00112088	1.09924e-05	0.520101	0.266943	0.00647165	0.00927752	0.00656606	0.0365156	4.67136e-07	0	0.0046	0.0013	0	0	0.0763	0.002	0	0.5819	0	0.0046	0.2682	0	0.0506	0.0105
266	1.45804e-28	0.434014	9.28967e-10	1.50332e-43	0.0280863	0.000498349	0.000140934	4.00944e-10	0.0851174	0.0220815	4.33358e-11	0.00181574	0.00761118	0.157389	2.5777e-08	0	0.7027	0	0.0541	0	0.0054	0	0	0.1081	0	0	0	0	0.1297	0
267	9.35912e-07	0.0408592	0.000483645	1.30905e-18	0.0694358	0.0571276	0.000332971	3.43678e-06	0.322211	0.0527535	0.00248668	0.000531327	0.00429514	0.0162547	0.000102339	0	0.0894	0	0.0184	0.1085	0.0316	0	0	0.0355	0.2071	0.0335	0.0112	0	0.2078	0.2571
268	9.34595e-20	0.392979	8.5047e-08	1.17082e-40	0.0663565	0.0357734	0.000337175	1.73923e-09	0.0658129	0.0227603	4.41028e-11	0.000512481	0.0051884	0.0476293	1.51527e-06	0	0.6413	0	0.0013	0.1218	0.0424	0	0	0.1144	0.0047	0.0081	0.0007	0	0.0155	0.0498
269	2.43482e-13	0.000941494	0.000472368	7.48838e-38	0.00552184	0.00556505	0.00346206	0.00119379	0.244969	0.282322	0.742502	0.0395119	0.00240437	0.0214826	3.17237e-10	0.0112	0.0033	0	0	0	0	0.0007	0	0.0007	0.7015	0.2137	0.023	0.0289	0.0072	0.0099
270	1.0429e-13	0.000920147	0.000236455	2.91021e-39	0.00575048	0.00417221	0.00290749	0.000286047	0.276691	0.324193	0.314138	0.0390123	0.00277898	0.0286316	3.10352e-10	0	0.0256	0.0007	0.0013	0	0.0855	0	0	0.6884	0	0.1709	0.0092	0	0	0.0184
271	2.02453e-17	0.00152576	5.01407e-05	1.79191e-37	0.00456864	0.000652182	0.00157413	0.000306063	0.320125	0.249362	0.54155	0.042583	0.00263233	0.0342276	6.97319e-11	0	0.0164	0	0	0	0.0053	0.0131	0	0.5773	0.0007	0.2051	0.1368	0	0	0.0454
272	4.40124e-15	0.000477199	7.09882e-05	2.06338e-45	0.00753695	0.00232166	0.00230351	0.000131297	0.413703	0.252538	0.26343	0.0425573	0.00359716	0.0315741	1.94277e-10	0.0013	0.0118	0	0.0072	0	0.0053	0.0033	0	0.1729	0	0.1414	0.497	0.002	0.0039	0.1538
273	9.28206e-20	0.000765849	2.68411e-05	9.14978e-41	0.00404897	0.000609624	0.00153596	0.000167819	0.329278	0.233229	0.555999	0.0342482	0.00183518	0.0318799	6.24844e-12	0	0.0112	0	0	0	0.0007	0.0033	0	0.2341	0	0.0138	0.5168	0	0.0039	0.2163
274	6.09105e-20	0.000194137	1.06443e-05	1.68948e-50	0.00740539	0.00311382	0.00281719	4.19932e-05	0.383595	0.143025	0.212197	0.0488709	0.002823	0.0378798	2.8792e-11	0.0007	0.0053	0.0013	0.0039	0	0.0125	0.025	0.0007	0.4661	0	0.002	0.4458	0	0.0131	0.0237
275	9.6879e-16	0.00290259	1.78928e-05	2.94068e-37	0.0157832	0.00569073	0.00126643	3.44615e-06	0.466468	0.27132	0.00110759	0.0113427	0.00377281	0.0491532	7.95068e-09	0.0013	0.215	0	0	0	0.0414	0.0125	0	0.3544	0.0059	0.0657	0.2847	0	0.0026	0.0164
276	6.90233e-32	0.500408	2.02912e-10	5.04525e-51	0.0111842	0.00123662	0.000337607	5.29822e-10	0.0964235	0.0763269	3.73785e-11	0.00158271	0.00427834	0.157092	6.72659e-10	0	0.595	0	0	0	0.3212	0	0	0.0056	0	0.0698	0	0	0.0084	0
277	8.62191e-20	0.930977	3.01414e-08	3.17913e-46	0.0542045	0.204272	0.000548827	1.34576e-09	0.00124056	0.00194271	9.17648e-14	0.000413227	0.00637591	0.0290353	1.07064e-05	0	1	0	0	0	0	0	0	0	0	0	0	0	0	0
278	4.4361e-09	0.000597666	0.00203622	2.28419e-40	0.0042451	0.0169312	0.00641193	0.000972352	0.138016	0.437814	0.521613	0.0595847	0.00329349	0.0261349	8.63212e-10	0.0013	0.0007	0	0.0026	0	0	0.021	0	0.073	0.0013	0.3583	0.4997	0	0.0033	0.0388
279	1.20107e-16	0.000196072	7.156e-05	8.30032e-47	0.00854974	0.00691488	0.00408886	0.000165726	0.35646	0.172614	0.366358	0.0622638	0.0029238	0.029634	1.48052e-10	0.0013	0.027	0.0007	0.0013	0	0.1026	0.0066	0	0.5266	0	0.1677	0.0473	0	0.0013	0.1177
280	0.00034031	0.00223527	0.00417057	1.06472e-19	0.0316466	0.3392	0.00200841	1.23588e-05	0.106193	0.0731258	0.177252	0.00484248	0.00595006	0.0360076	0.000199106	0.0099	0.1381	0	0.0592	0.2577	0.0644	0	0	0.0309	0.1637	0.0079	0.0059	0.0072	0.1677	0.0874
281	6.81817e-09	9.6251e-05	0.000406943	9.81257e-49	0.00999891	0.0459751	0.00474588	5.76782e-05	0.26848	0.286866	0.68696	0.0271958	0.00695308	0.0468175	1.29015e-08	0.0184	0.0309	0.0026	0.0066	0	0.0112	0.023	0	0.0355	0.0585	0.5201	0.2341	0.0013	0.0033	0.0546
282	0.000599477	7.43497e-05	0.000816596	2.72829e-60	0.00760094	0.0109241	0.00486987	7.41103e-05	0.201652	0.428106	0.190312	0.0789454	0.0185044	0.0556561	8.02273e-09	0.0085	0.0191	0.0118	0.0033	0	0.0007	0.0342	0.0072	0.0611	0.1907	0.0487	0.5319	0.0099	0.0059	0.0671
283	1.51488e-15	0.0289155	1.00744e-05	5.87168e-28	0.0245591	0.0111819	0.000541301	5.79661e-07	0.406237	0.196476	8.13399e-05	0.00165578	0.00299252	0.0418003	1.47306e-07	0	0.4806	0.0007	0.0112	0.0874	0.0283	0	0	0.384	0	0.0013	0	0	0.0066	0
284	1.59384e-08	0.00114752	0.000393069	2.52319e-30	0.0172129	0.0229714	0.00146506	1.89112e-05	0.488553	0.272158	0.390537	0.00926298	0.0059747	0.0470665	8.1829e-07	0	0.0256	0	0.0026	0.0026	0.0342	0.0007	0	0.9224	0.0039	0.0079	0	0	0	0
285	0.00309152	8.39176e-05	0.0324027	1.06433e-36	0.0258732	0.035369	0.004494	0.00043647	0.0646808	0.232719	0.18331	0.048522	0.00926336	0.0406411	1.36917e-07	0.0506	0.0539	0.0611	0.0033	0.002	0.1723	0.0039	0.0013	0.1986	0.215	0.142	0.0224	0.0671	0.0033	0.0033
286	0.000155063	0.00186507	0.00257962	1.43319e-27	0.0266223	0.312235	0.00158689	2.23712e-05	0.136039	0.0659471	0.605707	0.00190134	0.00478065	0.0212223	2.09735e-05	0	0.0026	0	0.0013	0.4898	0.0467	0	0	0.2636	0.1118	0.0007	0	0.0026	0.0796	0.0013
287	3.39671e-05	0.00540132	0.000954177	1.21325e-28	0.0230238	0.142028	0.00121833	1.91084e-05	0.209583	0.106385	0.25744	0.00189352	0.00539629	0.0227591	1.46985e-05	0	0.0059	0	0.0033	0.5838	0.0368	0	0	0.1736	0.0671	0.0013	0.0007	0.0026	0.098	0.027
288	6.90336e-11	0.0445562	5.92016e-05	1.04113e-23	0.0357986	0.0233801	0.000415826	8.39064e-07	0.324001	0.143257	0.000152139	0.000858397	0.00375279	0.0305852	3.08827e-06	0	0.1584	0	0.0131	0.4188	0.1341	0	0	0.0217	0.0565	0.0072	0.0013	0	0.0625	0.1262
289	9.72696e-05	6.48949e-05	0.0050062	7.27434e-34	0.0536451	0.0451028	0.00338713	5.09466e-05	0.114994	0.110515	0.141842	0.0605641	0.0201822	0.0933942	1.46711e-05	0.0329	0.0112	0	0.0217	0.0099	0.0066	0.0026	0	0.0085	0.3846	0.0256	0.2288	0.069	0.1282	0.0703
290	5.35772e-10	0.000219488	0.000541683	4.87049e-43	0.0137255	0.0103274	0.00621844	0.000714169	0.0778271	0.14642	0.3398	0.16946	0.0146301	0.0754934	8.62818e-08	0	0.0053	0	0.002	0	0	0.0059	0	0.0026	0.0131	0.0013	0.8685	0.0447	0.0289	0.0276
291	1.32721e-28	0.425386	2.69698e-09	1.27821e-37	0.0127441	0.000173541	0.000174606	7.36262e-09	0.114367	0.0502321	6.81516e-09	0.00371522	0.00597299	0.15736	5.86585e-09	0	0.894	0	0	0	0.015	0	0	0.044	0	0.011	0.028	0	0.002	0.006
292	5.91415e-05	0.000163751	0.00158717	4.67595e-44	0.0224217	0.0603397	0.00314923	5.51163e-05	0.486805	0.253411	0.480183	0.0183996	0.00843974	0.0303481	3.74491e-07	0	0	0	0	0.002	0.0033	0	0	0.9901	0.0007	0	0	0.0039	0	0
293	0.00021615	0.000284069	0.00897151	5.72047e-27	0.075491	0.0127184	0.000869003	4.48469e-05	0.154719	0.136824	0.0682946	0.00740052	0.0113488	0.0515696	3.69385e-06	0.0145	0.0092	0.0224	0.0059	0.073	0.0138	0.0046	0.0007	0.3951	0.2321	0.0164	0.0066	0.0079	0.1723	0.0256
294	1.69729e-11	0.000121725	0.00101308	2.6744e-56	0.00797383	0.00786846	0.0115897	0.00618765	0.103495	0.186834	0.210118	0.245421	0.0053424	0.0193743	8.19439e-11	0.0007	0.0224	0	0.0184	0	0.0007	0.0289	0.0007	0.0059	0.075	0.0066	0.67	0.0085	0.069	0.0934
295	4.56143e-09	0.000179859	0.000570845	3.15339e-58	0.0071153	0.0107469	0.0182998	0.00391136	0.0420244	0.153802	0.0766368	0.536234	0.0174682	0.0476812	5.46495e-09	0.0007	0.0309	0.0007	0.021	0	0.0013	0.0033	0.0039	0.0237	0.0046	0	0.8297	0.0296	0.0394	0.0112
296	2.67674e-18	0.010298	1.77421e-06	8.55799e-37	0.0405694	0.0249146	0.000568603	6.33823e-08	0.613511	0.161927	9.31445e-06	0.0009916	0.00263636	0.0414896	5.13593e-08	0.0013	0.4444	0	0.0059	0.0039	0.1657	0	0	0.3636	0.0053	0.0099	0	0	0	0
297	1.31219e-06	0.000186565	0.000569684	2.00977e-55	0.00651631	0.0154056	0.00478358	0.000121401	0.24706	0.411239	0.26926	0.046399	0.00874537	0.0355595	2.65105e-09	0.0007	0.0039	0	0.002	0.0066	0.0013	0	0	0.9658	0.0112	0	0	0.0039	0.0046	0
298	1.6295e-05	0.00320701	0.000296667	2.22968e-46	0.00317383	0.00104603	0.0014987	0.000109959	0.152001	0.587512	0.147072	0.029646	0.0134705	0.0606983	6.39364e-09	0	0.0796	0	0.0066	0	0	0.002	0	0	0.5161	0.0171	0.1775	0.0237	0.1236	0.0539
299	6.65936e-15	0.158797	1.26932e-05	9.27675e-21	0.0192569	0.000885937	0.000257984	2.78174e-06	0.21365	0.122395	7.58257e-05	0.00328161	0.0047087	0.0463269	3.62628e-07	0.0059	0.3978	0	0.0033	0.0026	0.1598	0.0007	0	0.144	0.0158	0.1223	0.0309	0.0007	0.0092	0.1072
300	4.30863e-08	0.000921198	0.000716804	2.3394e-32	0.0362459	0.440431	0.00241217	9.69353e-06	0.335767	0.089197	0.185634	0.0023329	0.00329388	0.0197143	4.06412e-06	0.0039	0.0283	0.0007	0.0072	0.0105	0.4431	0	0	0.4536	0.0013	0.0506	0	0	0.0007	0
301	4.01923e-05	0.000183541	0.00172414	2.80804e-37	0.029178	0.0623285	0.00240463	5.21628e-05	0.139983	0.146007	0.667464	0.012347	0.0141376	0.0659061	4.19482e-06	0	0.0184	0	0.0033	0.0204	0.0855	0	0	0.7962	0.0572	0.0079	0.0033	0.0039	0.0039	0
302	0.000282472	1.51874e-05	0.00132162	1.77202e-57	0.0153295	0.0117525	0.00373905	2.31203e-05	0.193561	0.341829	0.200932	0.0668392	0.0213786	0.0837793	1.58978e-08	0	0.0099	0	0.0204	0.0487	0.0033	0.0085	0	0.0066	0.0842	0.0217	0.67	0.0072	0.0434	0.0763
303	2.5916e-08	0.000128137	0.000192267	8.23491e-64	0.00267415	0.00752857	0.00691975	0.000159612	0.104216	0.418281	0.365539	0.102461	0.0106587	0.0501092	1.6734e-10	0.002	0.0105	0.0007	0.0053	0	0.002	0.0355	0.0007	0.0039	0.1177	0.0118	0.5687	0.0118	0.1111	0.1183
304	1.26173e-06	0.000126651	0.00216124	1.70447e-29	0.0444303	0.0345524	0.00360594	8.314e-05	0.131976	0.129835	0.318624	0.0753254	0.0212173	0.127319	3.22421e-05	0	0.0256	0.0013	0.0191	0.0092	0.0072	0	0	0.0736	0	0	0.0796	0	0.7837	0.0007
305	3.48554e-15	0.0139237	1.41212e-05	3.12033e-34	0.00627199	0.000169051	0.000420395	1.18426e-05	0.414447	0.444902	0.00593095	0.0102721	0.0048181	0.0598504	8.4493e-10	0.0007	0.021	0	0.0335	0.0217	0.1736	0	0	0.0007	0.4753	0.044	0.0631	0.0007	0.0289	0.1368
306	4.90426e-28	0.443782	1.5779e-09	9.05227e-39	0.0233227	0.000167955	0.000112566	9.44296e-10	0.0669073	0.0188433	2.47753e-10	0.00330462	0.0095104	0.190431	4.29795e-08	0	0.5263	0	0	0	0.2632	0	0	0	0	0.1579	0.0526	0	0	0
307	1.11067e-08	0.000354593	0.000602227	5.35444e-34	0.0274878	0.224346	0.00274192	1.78075e-05	0.207834	0.12414	0.529067	0.00480779	0.00551928	0.0432461	1.88547e-06	0.0013	0.0171	0	0.0013	0.0072	0.1815	0	0	0.7304	0.0072	0.0526	0	0	0.0007	0.0007
308	1.21128e-09	0.000948278	0.000328963	6.31326e-32	0.0145066	0.230706	0.00363311	1.98468e-05	0.222645	0.185136	0.499838	0.0071373	0.00449173	0.0456496	1.42541e-06	0.0007	0.0934	0	0.0099	0.0033	0.2156	0.0007	0	0.5707	0.0848	0.0059	0.0013	0.0138	0	0
309	1.6017e-05	0.000240095	0.000888622	2.85697e-43	0.017044	0.0128123	0.00320225	0.00016638	0.125215	0.254103	0.460476	0.0471193	0.022807	0.0916738	8.25005e-07	0.0131	0.0329	0	0	0	0.0112	0.0026	0	0.14	0.4451	0.0125	0.046	0.2945	0.0013	0.0007
310	2.67743e-06	3.56636e-05	0.000318061	7.00117e-68	0.00250779	0.0185745	0.00751136	3.78154e-05	0.107203	0.530049	0.465633	0.062867	0.0110214	0.0592831	1.20309e-10	0.0059	0.0039	0	0	0.0736	0	0	0	0.6068	0.2045	0	0.0007	0.0204	0.0842	0
311	2.86292e-06	0.00126052	0.00204005	6.99931e-28	0.00976646	0.0584929	0.00500801	0.000251524	0.0874589	0.270216	0.619436	0.0449944	0.00955567	0.0726038	3.88294e-06	0.0099	0.0191	0	0.0171	0.0611	0.0131	0.0026	0	0.1354	0.3754	0.0546	0.0881	0.1229	0.092	0.0085
312	3.97551e-05	0.000180317	0.00552417	1.49439e-39	0.0136553	0.0496957	0.00667654	0.000361505	0.121799	0.30705	0.339448	0.0679853	0.00902515	0.0462204	1.58396e-07	0.0493	0.0394	0.044	0.0316	0.0138	0.096	0.0033	0.0007	0.0927	0.3044	0.0598	0.0671	0.0092	0.1315	0.0572
313	1.5216e-06	0.00340934	4.54617e-05	3.77833e-80	0.000162748	0.00145817	0.00987307	0.00117946	0.00266403	0.648261	0.165697	0.117301	0.0166512	0.0557424	9.75715e-13	0	0	0	0.0007	0.0217	0	0	0	0	0.7633	0	0	0.0158	0.1986	0
314	3.12987e-13	0.000649801	0.00019489	1.49666e-50	0.00341916	0.00332011	0.00646662	0.00153519	0.11208	0.26533	0.289909	0.152767	0.00460564	0.0290728	8.22704e-11	0.0007	0.0112	0	0.0026	0	0	0.0125	0	0	0.3051	0.021	0.5036	0.0289	0.0526	0.0618
315	7.10791e-08	9.63698e-05	0.00274016	8.79262e-71	0.00287411	0.0319243	0.0352397	0.0146601	0.0442198	0.348597	0.0901511	0.341433	0.00468021	0.0109569	4.7272e-12	0.0033	0.0131	0	0.0033	0	0.0039	0.0677	0	0.0118	0.1433	0.0191	0.62	0.0112	0.0552	0.048
316	0.000153033	2.09979e-05	0.000542531	4.1048e-71	0.0046937	0.0113117	0.00555529	3.39717e-05	0.208607	0.508632	0.241836	0.0632142	0.013993	0.0462313	1.73839e-10	0	0	0	0.0039	0	0	0	0	0	0.8554	0	0.0309	0.0013	0.0927	0.0158
317	5.20492e-06	0.000494471	0.000284562	1.51988e-69	0.000989843	0.0037304	0.00550198	0.00026594	0.03778	0.647427	0.17778	0.0443947	0.00876766	0.0350313	6.53503e-12	0.0007	0.1433	0	0.0033	0.002	0.0434	0.0026	0	0.0039	0.3833	0.0217	0.1861	0.0007	0.0736	0.1354
318	1.61721e-05	0.000374014	0.00251639	1.16183e-35	0.0230581	0.131965	0.00373911	0.000112269	0.295118	0.187938	0.621746	0.0147417	0.00678175	0.0306605	1.86803e-06	0	0.0165	0	0.0034	0.0048	0.0055	0.0007	0	0.8522	0.0557	0	0.0027	0.0474	0.0096	0.0014
319	2.28706e-07	0.000231562	0.000275602	8.56746e-61	0.0033943	0.00645759	0.00872389	0.000537721	0.0286509	0.298369	0.214566	0.199757	0.0212559	0.0782193	2.29637e-09	0.0092	0.0131	0	0.002	0.0007	0.0013	0.0026	0	0.0664	0.476	0.0033	0.0335	0.3853	0.0066	0
320	3.91725e-06	0.000323626	0.000316639	1.52352e-69	0.000752904	0.0137035	0.0136076	0.000482055	0.0136336	0.545426	0.345849	0.118501	0.0111342	0.0500342	2.97135e-11	0.0053	0.0033	0	0.0059	0.069	0.0013	0	0	0.4563	0.3018	0.0013	0	0.0447	0.1072	0.0039
321	2.43988e-05	6.78674e-05	0.000238818	1.3859e-73	0.0013296	0.00919681	0.00898512	8.04635e-05	0.0422598	0.570375	0.32266	0.104884	0.0160674	0.0669579	4.64852e-11	0	0.0158	0	0.021	0.071	0.0013	0.0013	0	0.0026	0.4885	0.0125	0.1821	0.0204	0.1308	0.0526
322	2.7843e-07	0.000195533	0.000410348	5.28194e-78	0.000708712	0.0277206	0.0364202	0.00333513	0.00712857	0.404359	0.186432	0.308663	0.00946322	0.0291911	4.32472e-12	0.002	0.0197	0	0.002	0	0.002	0.0329	0.0046	0.021	0.121	0	0.7475	0.0079	0.0348	0.0046
323	5.8478e-05	0.000114258	0.000798165	3.22791e-55	0.0084217	0.0130666	0.00568804	0.000139756	0.149233	0.352348	0.233467	0.104663	0.0190337	0.064445	2.85558e-08	0.0007	0.0039	0	0.0059	0	0	0.0079	0.002	0.0053	0.1381	0.002	0.6621	0.0118	0.1341	0.0263
324	0.000350446	2.64535e-05	0.00140365	1.04957e-68	0.00404053	0.0228234	0.00699933	7.78409e-05	0.159932	0.569841	0.322699	0.0431234	0.00867386	0.0320643	6.99763e-11	0.0007	0.0033	0	0	0	0.0007	0.0283	0	0.002	0.5128	0.0085	0.2597	0.0131	0.1414	0.0296
325	0.00299964	0.0126408	0.000439464	1.33613e-31	0.00835001	0.0012788	0.000784305	3.12659e-05	0.135576	0.354974	0.0297439	0.0263495	0.0257681	0.0957828	6.43118e-06	0.0033	0.1098	0	0.0026	0.0033	0.0138	0	0	0	0.6121	0.0822	0.0539	0.0296	0.0178	0.0717
326	3.78948e-11	0.0787462	7.83688e-05	2.20407e-27	0.00371583	0.000229796	0.000740474	9.28514e-05	0.133138	0.547369	0.00298152	0.0249487	0.00711747	0.0676917	1.19798e-08	0.0079	0.2814	0.0013	0	0.0013	0.0894	0.0033	0	0.0046	0.3208	0.0842	0.1604	0.0092	0.0013	0.0348
327	2.8016e-17	0.0419159	2.52529e-05	1.5517e-18	0.011345	0.000781893	0.000729819	0.000140928	0.402082	0.157537	0.0686243	0.0201314	0.00358163	0.0438526	9.01571e-08	0	0	0	0	0	0	0	0	0	0.6111	0	0.0556	0.3333	0	0
328	3.98834e-07	0.000178158	0.00143922	3.56753e-38	0.0353839	0.227915	0.00352805	3.28373e-05	0.477585	0.141267	0.444282	0.0094976	0.00486996	0.0237435	1.06463e-06	0	0.0079	0	0	0.0539	0.023	0	0	0.881	0.0105	0.0046	0	0	0.0191	0
329	5.2706e-13	0.00124041	9.47159e-05	5.86906e-32	0.0322703	0.00720786	0.00106863	1.39582e-05	0.723549	0.190612	0.0401095	0.0121515	0.00452195	0.036176	1.39257e-07	0	0.0874	0	0.0033	0.0039	0.0007	0	0	0.8817	0.0013	0	0	0	0.0217	0
330	5.1304e-08	0.000122274	0.000512777	2.64523e-63	0.00447962	0.00425244	0.0142428	0.0024701	0.0103311	0.192842	0.0696927	0.483569	0.0279504	0.0831565	1.19761e-09	0	0.0066	0	0	0	0	0.0053	0	0.0007	0.1308	0	0.7429	0.0822	0.0092	0.0224
331	5.54325e-08	0.00026394	0.00010032	5.38812e-54	0.0053831	0.00332119	0.00159794	8.7944e-06	0.376136	0.543975	0.199823	0.016681	0.0102935	0.0668675	1.57326e-09	0.0105	0.0197	0	0.0007	0	0.0039	0.0079	0	0.0007	0.5503	0.1479	0.0565	0.0625	0.1105	0.0289
332	2.68416e-08	0.000186766	0.000329458	4.57409e-69	0.00135021	0.0206967	0.0257322	0.00169347	0.013295	0.330144	0.203046	0.339702	0.01166	0.0452523	6.87308e-11	0.0112	0.0046	0	0.0013	0.002	0.025	0.0118	0	0.0112	0.3294	0.0447	0.3813	0.0007	0.0815	0.0953
333	3.53564e-06	0.0004396	0.000760493	1.05905e-50	0.00517226	0.0209356	0.00999698	0.000675018	0.0792246	0.302671	0.280329	0.188185	0.0149703	0.0547808	4.65058e-08	0.0092	0.0026	0	0.0125	0	0.0204	0.0085	0	0.021	0.2032	0.0513	0.4089	0.0013	0.1157	0.1453
334	9.41207e-09	0.0065925	0.00042699	4.92587e-42	0.00144766	0.00301443	0.00652539	0.00238964	0.0297631	0.464212	0.254529	0.164552	0.00850764	0.0542697	2.59504e-09	0.0007	0.1782	0	0.0901	0	0.0066	0.0013	0	0	0.4885	0.0519	0.0434	0.0079	0.044	0.0874
335	7.68064e-07	0.00118388	0.000307187	6.14815e-72	0.000519256	0.00700083	0.0147161	0.00250928	0.0084683	0.559309	0.148626	0.129661	0.00838622	0.0290205	3.46465e-12	0.0013	0.0118	0	0.0046	0	0	0.0118	0	0.0013	0.3162	0.0184	0.4214	0.0861	0.0697	0.0572
336	3.00648e-10	0.000519249	0.00872302	4.04826e-20	0.0343164	0.0294056	0.00354989	0.00111314	0.236515	0.149639	0.357894	0.0414635	0.00296252	0.0250762	2.01057e-07	0.0344	0.15	0.0953	0.0281	0.0047	0.1016	0.0141	0	0.1125	0.1047	0.0797	0.1484	0.0531	0.0688	0.0047
337	2.56431e-07	4.74229e-05	0.00184436	6.93311e-55	0.00713242	0.0228332	0.0104399	0.000507383	0.053491	0.301326	0.313339	0.142668	0.010475	0.0529498	1.51557e-09	0.0059	0.0138	0	0.0059	0.0033	0.0013	0.0013	0	0.0197	0.3741	0.0966	0.3393	0.0454	0.0546	0.0388
338	1.73967e-08	9.64825e-05	0.00076032	1.35378e-46	0.0240182	0.0136623	0.00784734	0.000608989	0.0874534	0.118685	0.13656	0.275536	0.0243166	0.0876635	4.22899e-07	0	0.0085	0	0.0158	0	0	0.0079	0	0.0072	0.0085	0.0039	0.7416	0.0302	0.0828	0.0934
339	1.53529e-07	0.0011989	0.000171935	5.0074e-81	0.000208124	0.00766366	0.0232756	0.00498639	0.00252389	0.572173	0.234884	0.154215	0.00787462	0.0270728	1.89433e-13	0.0105	0.0191	0	0.0112	0	0	0.0026	0	0	0.2604	0.0171	0.4274	0.1151	0.1072	0.0296
340	0.000396818	0.000570462	0.000408297	2.33824e-47	0.00489318	0.00532084	0.00272135	2.85851e-05	0.158359	0.512	0.178963	0.0581624	0.0215082	0.10348	1.17995e-07	0	0.0256	0	0.0118	0	0.002	0	0	0.0007	0.5247	0.1131	0.0033	0	0.194	0.1249
341	0.000184746	0.00600084	0.00211227	5.56574e-49	0.00248231	0.00253451	0.0039961	0.00263807	0.0662896	0.626562	0.0446672	0.0531531	0.00713416	0.0215504	5.29984e-10	0.0107	0.1866	0	0.0194	0.0013	0.0047	0.0054	0	0.0107	0.4582	0.0294	0.1358	0	0.0669	0.0709
342	5.77545e-27	0.364901	6.02981e-09	3.30613e-38	0.00927524	0.000177587	0.000183739	1.17445e-08	0.166031	0.126795	2.6108e-08	0.00256837	0.00497973	0.144362	1.80779e-09	0.0098	0.0028	0.0587	0	0.0042	0.0126	0.0014	0	0.0322	0.351	0.0462	0.2937	0.1804	0.0014	0.0056
343	7.72954e-09	0.000135772	0.00145025	8.35022e-57	0.0085377	0.0165131	0.0173669	0.00576241	0.0696751	0.184358	0.120911	0.378286	0.00989447	0.0276105	1.54565e-09	0.002	0.0112	0	0	0	0	0.002	0	0	0.2209	0.0421	0.5878	0.0546	0.0164	0.0631
344	1.86439e-07	0.000100297	0.000200967	1.52363e-81	0.000423573	0.0135927	0.022412	0.000733333	0.00372244	0.499678	0.405658	0.168357	0.0113796	0.0525121	7.26433e-13	0.0007	0.0046	0	0	0.0007	0	0.0046	0	0	0.551	0.0059	0.3603	0.0421	0.0171	0.0131
345	0.000859716	0.000134459	0.000988915	2.879e-61	0.00427432	0.0112347	0.00354966	5.08476e-05	0.124425	0.474647	0.201905	0.0273131	0.0104022	0.0362924	6.17343e-10	0.0059	0.0381	0	0.0013	0	0.0033	0	0	0	0.7357	0.0368	0.0039	0.0053	0.1466	0.023
346	0.00152365	3.34013e-05	0.000645472	6.87284e-64	0.0107261	0.00876851	0.00304362	1.61674e-05	0.333108	0.381724	0.122525	0.0487598	0.0187992	0.0503932	5.25377e-09	0.0013	0.002	0.0007	0.002	0	0.0026	0.0178	0	0.0138	0.4346	0.1683	0.2446	0.0013	0.0184	0.0927
347	2.27213e-06	0.00340424	0.000163536	5.36157e-34	0.0137017	0.00777448	0.000922402	5.26708e-06	0.344744	0.333413	0.0449172	0.00902418	0.0133308	0.0790581	2.81069e-06	0.0053	0.0421	0	0.0033	0.0007	0.0158	0	0	0	0.2367	0.3314	0.0007	0	0.0559	0.3083
348	2.07648e-31	0.471521	2.67335e-10	2.42624e-50	0.012364	0.000883615	0.00022839	4.96428e-10	0.130165	0.0759043	8.89803e-11	0.000915414	0.00380353	0.133478	4.51942e-10	0	0.725	0	0.0375	0	0.0625	0	0	0.05	0.0125	0.0125	0	0	0.05	0.05
349	4.95901e-23	0.251629	6.7526e-08	6.33689e-32	0.0151199	0.000506418	0.000379273	7.49138e-08	0.209718	0.145844	7.66943e-08	0.00839532	0.00690254	0.140321	6.51964e-08	0.0488	0.1175	0	0.0075	0.2612	0.1612	0	0	0.0625	0.29	0.0175	0.005	0.0038	0	0.025
350	2.12047e-25	0.341669	3.75721e-08	4.96722e-29	0.00994897	0.00016313	0.000261791	1.82815e-07	0.176171	0.102482	8.56495e-07	0.00795582	0.00549067	0.133404	1.55958e-08	0.0033	0.1317	0.0047	0.014	0.01	0.1124	0	0	0.2063	0.2635	0.2016	0.0406	0.0106	0.0007	0.0007
351	6.48378e-10	0.0319079	0.000135906	3.12057e-27	0.00340434	0.00315122	0.00254273	0.000411483	0.0849978	0.358361	0.185839	0.0611477	0.00985938	0.0795401	4.91641e-07	0.0053	0.0224	0	0	0.0026	0.0283	0.0007	0	0	0.8356	0.0539	0.0388	0.0066	0.0039	0.002
352	3.41712e-08	0.000102346	0.0117378	4.27562e-31	0.315268	0.00666453	0.000636789	0.000130762	0.44706	0.0292385	0.00384776	0.00898705	0.00565514	0.012611	3.18766e-07	0.0305	0.0159	0.3988	0	0.4451	0.1098	0	0	0	0	0	0	0	0	0
353	1.12631e-06	0.000203621	0.0163174	1.6413e-21	0.211531	0.0511375	0.00185743	0.000184698	0.231923	0.0428333	0.0186324	0.0225009	0.0086385	0.0314279	4.14534e-05	0.0079	0.0283	0.1433	0.0007	0.1834	0.4813	0.0013	0	0.073	0.0099	0.0671	0.0033	0	0	0.0007
354	1.00277e-09	0.00296066	0.000376103	2.12963e-24	0.0317661	0.0672937	0.00173468	3.72029e-05	0.518162	0.13432	0.260208	0.00792703	0.00476563	0.031845	9.90442e-06	0	0.2117	0	0.0099	0.0026	0.2636	0	0	0.5082	0.0026	0.0007	0.0007	0	0	0
355	5.81952e-09	3.36557e-05	0.000849548	1.78294e-59	0.0114608	0.0382183	0.0198907	0.000885733	0.107808	0.162561	0.125452	0.399237	0.0124486	0.0418457	4.94316e-09	0.0217	0.021	0	0.0079	0.0007	0.0085	0.0664	0	0.0697	0.192	0.1723	0.4096	0.0125	0.0046	0.0131
356	7.22975e-08	0.000577954	0.000193078	9.8714e-75	0.000308446	0.00933443	0.0161401	0.00123061	0.00585143	0.600827	0.429954	0.100427	0.00701348	0.0360846	6.34065e-13	0.0322	0.0072	0.0007	0.0026	0	0	0.0644	0.0007	0.0026	0.4011	0.0309	0.3629	0.0112	0.0191	0.0644
357	9.03994e-08	8.39601e-05	0.000602727	2.30261e-75	0.0013812	0.0407548	0.0380537	0.00269954	0.0147202	0.339901	0.180256	0.34768	0.00883253	0.0279084	1.18115e-11	0.0013	0.0085	0	0.0013	0	0.0039	0.0224	0	0.0322	0.0618	0.023	0.7995	0.002	0.0046	0.0394
358	1.01472e-07	0.000260132	0.00046248	4.30376e-64	0.00151316	0.00892177	0.00998062	0.000941037	0.02896	0.457982	0.441329	0.103029	0.0083667	0.0382262	3.25633e-11	0.023	0.0217	0	0.0007	0	0	0.0184	0	0	0.4523	0.0309	0.2235	0.1282	0.0901	0.0112
359	1.81992e-05	0.00142055	0.0011584	3.33014e-43	0.0029276	0.0156673	0.00432929	0.000353666	0.0900343	0.512496	0.663275	0.031208	0.00748128	0.043602	1.14136e-08	0.0033	0.0184	0	0	0	0	0	0	0	0.4451	0.0131	0.0118	0.0178	0.4885	0.002
360	2.02643e-05	0.000580164	0.000397972	4.10541e-73	0.000526935	0.00755386	0.00951218	0.000663952	0.0134035	0.665633	0.291523	0.0521295	0.00780853	0.0306674	2.06314e-12	0.0381	0.0112	0.0013	0.0033	0	0.0079	0.0138	0.0007	0.0059	0.4234	0.1723	0.2124	0.0059	0.0204	0.0835
361	0.00507293	0.0082915	0.00334252	7.84357e-36	0.00387788	0.00364838	0.00104837	0.000182528	0.0853253	0.536273	0.18194	0.00565598	0.00549275	0.0251557	8.43747e-09	0.0112	0.1755	0	0.002	0	0.0368	0	0	0.0013	0.3314	0.2781	0.0125	0	0.0316	0.1197
362	1.81012e-06	0.00978875	0.0038553	1.60128e-36	0.00279332	0.00463343	0.00559857	0.00919414	0.0628611	0.539813	0.152468	0.0853906	0.00461968	0.0210024	2.48373e-09	0.002	0.0059	0	0	0.0026	0.1893	0	0	0.0007	0.5799	0.1229	0.0493	0.0092	0.0053	0.0329
363	1.3482e-05	1.01292e-05	0.0498159	3.0604e-39	0.24011	0.0383372	0.0019938	0.000106809	0.358639	0.0687052	0.00662709	0.0176961	0.00548067	0.0148004	6.74356e-08	0.0408	0.0563	0.4724	0	0.1954	0.0762	0.0166	0.0022	0.0408	0	0.0662	0.0254	0	0.0033	0.0044
364	1.06083e-06	6.11395e-06	0.00183559	5.45728e-70	0.0125927	0.0498197	0.0129913	0.000233357	0.233463	0.297732	0.19426	0.115825	0.00817312	0.0238336	1.35083e-10	0.0099	0.0263	0.0039	0.0592	0	0.0079	0.0026	0	0.0072	0.2275	0.0526	0.3997	0.0256	0.0276	0.1499
365	1.28738e-07	0.000699285	0.000726491	3.60159e-48	0.00561285	0.022444	0.0089468	0.00108664	0.103347	0.289929	0.322741	0.125266	0.00945958	0.0377989	2.0414e-08	0.0131	0.14	0	0.0204	0	0.0046	0.0125	0	0.0118	0.3886	0.0546	0.1762	0.0631	0.0973	0.0178
366	5.92099e-09	0.000125692	0.000411587	1.00984e-61	0.00345992	0.00911123	0.0138242	0.00131464	0.0312715	0.253964	0.235661	0.31104	0.0137867	0.0545618	4.37471e-10	0	0.0217	0	0.0046	0	0	0.002	0	0	0.382	0.0237	0.3511	0.0763	0.0776	0.0611
367	8.18554e-05	0.00438827	0.000736375	7.05478e-74	0.000360605	0.004081	0.0113242	0.0093058	0.00613826	0.694356	0.0868938	0.0605551	0.00610833	0.0145297	4.51649e-13	0.0427	0.0092	0.0013	0.0007	0	0.0026	0.0072	0	0	0.5503	0.0677	0.238	0.0145	0.0335	0.0322
368	1.09861e-16	0.0989561	5.86663e-06	1.04505e-21	0.00716529	6.54636e-05	0.000195767	6.26852e-06	0.368874	0.352457	0.00210029	0.00698677	0.00528747	0.0843369	1.21907e-08	0.0009	0.8012	0	0.0079	0	0.0061	0	0	0.0009	0.1033	0.0271	0.007	0.0026	0.0219	0.021
369	4.83132e-08	0.00521055	0.0012635	7.68905e-28	0.0107275	0.00547132	0.00256451	0.000646546	0.268656	0.335199	0.127577	0.0550294	0.00646211	0.03573	2.62031e-07	0.0105	0	0	0	0.0401	0.3498	0	0	0.002	0.2295	0.0348	0.0085	0.0072	0.0342	0.2834
370	1.67067e-08	0.000463868	0.00291248	5.6342e-41	0.0153507	0.021833	0.00789737	0.0020201	0.309562	0.252398	0.107404	0.138579	0.00489894	0.0185519	1.66646e-08	0.0335	0.0316	0.0013	0.0105	0	0.0322	0.0888	0	0	0.5575	0.0263	0.1966	0.0131	0.0013	0.0072
371	8.32071e-08	0.000265908	0.0268827	1.96175e-28	0.0231926	0.0886735	0.00917948	0.00263332	0.161774	0.210283	0.217304	0.0839914	0.00276126	0.017256	5.01867e-08	0.1387	0.0105	0.021	0.0013	0.0046	0.1078	0.0171	0.0026	0.0756	0.1867	0.0789	0.1972	0.0026	0.0493	0.1059
372	7.30923e-05	2.31383e-05	0.0513284	6.31353e-27	0.293135	0.0569145	0.00211134	8.194e-05	0.350247	0.0567394	0.00982647	0.0321066	0.00921761	0.0307909	1.2384e-05	0.0423	0.0725	0.1631	0.0272	0.1047	0.143	0.0272	0	0.1128	0	0.2075	0.0715	0	0.0141	0.0141
373	2.28966e-08	0.000283802	0.00294182	1.18593e-22	0.0968645	0.179222	0.0030439	4.41722e-05	0.336515	0.0758758	0.0888069	0.0186099	0.00665094	0.0432169	5.29885e-05	0.0408	0.1387	0.1012	0.0342	0.071	0.2551	0.0224	0.002	0.1361	0.0131	0.1197	0.0546	0.0007	0.0026	0.0079
374	1.05836e-05	0.000475607	0.00232332	2.97989e-30	0.0462541	0.401649	0.00286636	1.89268e-05	0.201877	0.0691883	0.265423	0.00568598	0.00612098	0.0296646	3.20528e-05	0.0092	0.0657	0.0322	0.0164	0.0039	0.3774	0.0013	0	0.3991	0.0138	0.0736	0.0053	0	0.0007	0.0013
375	0.000338001	0.000900944	0.00284151	1.85152e-31	0.0429898	0.306281	0.00192036	2.23423e-05	0.195672	0.0498183	0.305731	0.00385615	0.00623488	0.0199223	3.42006e-05	0	0.0362	0.0007	0.0105	0.0079	0.5286	0	0	0.3866	0.002	0.0276	0	0	0	0
376	1.06365e-09	0.000286511	0.0106373	4.01642e-22	0.0512863	0.0563675	0.00363276	0.000545076	0.272205	0.125614	0.2012	0.0312151	0.00294773	0.0225277	3.11119e-07	0.0355	0.071	0.027	0.0335	0.1755	0.1059	0.0092	0.0033	0.071	0.0171	0.0099	0.1446	0	0.2919	0.0046
377	2.52416e-06	0.000136813	0.0100722	1.13979e-30	0.077724	0.435228	0.00605127	9.08734e-05	0.394221	0.0954645	0.0788889	0.0220929	0.00410915	0.0184034	6.30608e-06	0.0051	0.0471	0.0067	0.0101	0.2946	0.0303	0	0.0017	0.096	0.0034	0	0.2155	0	0.2811	0.0084
378	3.86747e-05	8.75732e-05	0.0182458	3.3213e-25	0.194743	0.328811	0.00216071	2.6006e-05	0.38738	0.0444957	0.0590383	0.00716805	0.00535802	0.0208466	5.17637e-05	0.0083	0.0759	0.2414	0.0065	0.0046	0.3506	0.0111	0.0009	0.1748	0.0278	0.0564	0.0231	0.0139	0.0009	0.0037
379	5.87053e-07	0.000401255	0.00110619	1.37796e-38	0.0246276	0.570543	0.00228288	9.91364e-06	0.142861	0.0591682	0.678579	0.0010496	0.0029843	0.0159951	6.83251e-07	0	0.0007	0	0.0007	0.1098	0.0565	0	0	0.6857	0.0756	0	0	0	0.071	0
380	4.95189e-07	4.78264e-05	0.00093559	2.32973e-54	0.0133313	0.00684355	0.00591249	0.000319891	0.0565749	0.221361	0.184882	0.163975	0.0239621	0.0920431	1.55245e-08	0.0224	0.0099	0.0053	0.0013	0	0.002	0.0085	0	0.0362	0.0375	0.0112	0.7804	0.0335	0.0138	0.0381
381	3.77431e-06	0.00699674	0.000413056	1.01824e-32	0.00379175	0.00535661	0.00147879	6.64371e-05	0.153022	0.537881	0.425502	0.012276	0.00859161	0.065992	1.36068e-07	0.002	0.1775	0	0.0053	0	0.0039	0	0	0.021	0.4629	0.0302	0.0105	0.002	0.284	0.0007
382	8.1819e-05	0.000140826	0.000653584	4.17867e-70	0.00159998	0.0130379	0.0085161	0.000252102	0.0429012	0.559884	0.290021	0.0612475	0.00991751	0.0352158	3.15948e-11	0.0026	0.0191	0	0.0131	0	0.0171	0.0125	0	0.002	0.4826	0.2446	0.1315	0	0.0276	0.0473
383	8.59718e-09	0.000157802	0.00491417	3.46738e-21	0.144206	0.16808	0.00356957	5.74835e-05	0.375668	0.0771312	0.0328384	0.02988	0.00671821	0.0457142	5.51387e-05	0.0026	0.0579	0.0085	0.0197	0.1433	0.0204	0.0013	0.002	0.0434	0.0046	0	0.2426	0	0.4536	0
384	4.46294e-06	0.000160283	0.0109082	4.74066e-20	0.156993	0.259141	0.00248126	2.21457e-05	0.248257	0.0612718	0.0323461	0.0122513	0.00730366	0.0435374	0.000170533	0	0.0392	0	0.1078	0.0637	0.1275	0	0	0.0784	0	0	0.0784	0	0.5049	0
385	2.39917e-12	0.00347722	1.86774e-05	5.99378e-38	0.0560614	0.121247	0.000924432	1.06084e-07	0.553931	0.15605	3.79773e-05	0.00116601	0.0041113	0.0368649	1.07093e-06	0	0.4135	0	0.0118	0.0026	0.2492	0	0	0.2945	0.0066	0.0204	0.0007	0	0.0007	0
386	2.1954e-10	0.00322701	0.000237002	6.51565e-29	0.0188212	0.353625	0.00155378	1.16814e-05	0.177285	0.0835358	0.651109	0.000734903	0.00244898	0.0221698	1.3719e-06	0	0.0007	0	0.0013	0.1953	0.0651	0	0	0.5247	0.0579	0	0	0	0.1532	0.002
387	6.01548e-09	9.31395e-05	0.000850774	1.48673e-48	0.0174475	0.00696417	0.00962824	0.00180611	0.037461	0.1068	0.154571	0.433883	0.0282367	0.0980779	1.23992e-07	0.0585	0.0164	0.0053	0	0	0.0191	0.0763	0.0013	0.1604	0.023	0.2728	0.3511	0	0	0.0158
388	5.45444e-06	0.00752381	0.000736531	2.28055e-31	0.00341089	0.0140628	0.00298868	0.000171206	0.0904394	0.517	0.377284	0.0242745	0.00812482	0.0641921	2.64625e-07	0.0204	0.1275	0	0.0145	0	0.0072	0.0066	0	0.0046	0.4037	0.2663	0.0907	0.0217	0.0171	0.0197
389	8.19317e-07	0.00186849	0.000487787	3.46321e-29	0.0736265	0.666776	0.00116626	1.31633e-06	0.0110407	0.00542935	0.0274748	0.000748255	0.00885362	0.0386312	0.000615843	0	0.0072	0.0295	0.0159	0.0295	0.8995	0	0	0.012	0.0016	0.004	0	0	0.0008	0
390	2.91423e-05	0.00700603	0.0022572	3.35222e-20	0.0809017	0.734172	0.00149279	2.93273e-06	0.101487	0.0221107	0.00391553	0.00100767	0.00366173	0.0154844	0.000744249	0.0013	0.1867	0.0256	0.0112	0.0046	0.6943	0	0	0.05	0.0105	0.0151	0.0007	0	0	0
391	6.02208e-08	3.75321e-05	0.00161476	3.51597e-48	0.0333604	0.0259943	0.00772704	0.000449717	0.190739	0.13458	0.190142	0.181172	0.0156832	0.0546808	1.50859e-07	0.1795	0.0585	0.0007	0.0059	0.0007	0.0703	0.0296	0.0007	0.1229	0.0868	0.3425	0.0986	0	0.002	0.0013
392	7.52973e-07	1.65793e-05	0.00217817	3.04722e-62	0.00950696	0.0482391	0.0115826	0.000332032	0.170651	0.317902	0.358526	0.0972753	0.00717323	0.0272699	3.57143e-10	0.1065	0.0526	0	0.0059	0.0145	0.0855	0.044	0.0013	0.2156	0.213	0.1578	0.0664	0	0.0276	0.0092
393	1.43747e-09	9.59238e-05	0.000163358	3.03764e-69	0.00274514	0.00649726	0.0142753	0.0009049	0.0378883	0.241532	0.199028	0.357531	0.0154666	0.0520206	1.19859e-10	0.0013	0.0039	0	0.0007	0	0	0.0092	0	0	0.0828	0.0631	0.7745	0.0026	0.0033	0.0585
394	1.76628e-16	0.262262	2.79952e-06	6.19841e-26	0.00635449	0.000645082	0.000243114	7.00714e-07	0.135042	0.319819	3.5263e-05	0.00146294	0.00366369	0.067299	1.27282e-08	0.0042	0.5797	0	0	0.0017	0.0299	0	0	0.005	0.157	0.1512	0.0083	0.0017	0.005	0.0565
395	3.87017e-37	0.694409	3.76679e-12	2.6893e-66	0.0127907	0.00484182	0.000377036	1.00633e-11	0.0491725	0.0404392	2.66768e-14	0.000497241	0.0035777	0.162282	9.13846e-11	0	0.0238	0	0	0	0	0	0	0.9524	0	0	0	0	0.0238	0
396	1.10125e-11	0.0255793	0.000758828	1.93127e-11	0.0172937	0.00444143	0.00190527	0.000872399	0.244811	0.149088	0.0731476	0.0685998	0.00486393	0.0394556	4.6745e-06	0.0009	0.1577	0	0.0066	0.034	0.0161	0	0	0.0708	0.3399	0.0019	0	0.0689	0.3012	0.0019
397	5.92388e-08	0.00522923	0.000206009	1.32326e-34	0.0330537	0.902043	0.0022421	2.14904e-06	0.0165789	0.00816825	0.0547586	0.00047354	0.00419985	0.0184847	9.84134e-05	0.0015	0.0582	0.0224	0.0186	0.0186	0.8494	0	0	0.0037	0.0045	0.0224	0.0007	0	0	0
398	2.48794e-07	0.00432934	0.000364017	3.83116e-29	0.0329384	0.783313	0.00177184	1.06262e-06	0.0666262	0.0313266	0.0250967	0.000612441	0.0035324	0.0228932	5.92548e-05	0.002	0.1335	0.0053	0.0118	0.0026	0.6785	0	0	0.1315	0.0072	0.027	0.0007	0	0	0
399	7.51582e-12	0.000518445	0.000628061	2.74205e-32	0.016381	0.0317005	0.00149537	0.000134	0.254289	0.190697	0.923611	0.00267645	0.00248541	0.0259688	9.56262e-09	0	0.0256	0	0.0072	0.0013	0.3037	0	0	0.1992	0.0585	0.3366	0	0	0.027	0.0408
400	8.4387e-10	0.000721866	0.0011932	5.19688e-34	0.0102451	0.0828106	0.00260039	0.000170131	0.295089	0.272099	0.91315	0.00375376	0.00200731	0.0181171	1.03803e-08	0.0085	0.0493	0	0.0118	0	0.2275	0	0	0.1723	0.1006	0.4227	0.0007	0	0.0046	0.002
401	9.38104e-05	0.000522818	0.000881169	1.17366e-44	0.00770672	0.0170749	0.00260786	6.78212e-05	0.27943	0.424839	0.539889	0.0195148	0.00988628	0.0446601	7.3288e-08	0.0703	0.0513	0	0.0105	0	0.0178	0.0013	0	0.0388	0.4057	0.2288	0.0204	0.0007	0.1499	0.0046
402	3.10981e-08	7.97611e-05	0.000266948	4.10125e-71	0.00236091	0.0149022	0.0163882	0.000571626	0.0491276	0.335948	0.193478	0.249824	0.0116215	0.0399996	6.4914e-11	0.075	0.0204	0.0112	0.002	0	0.0059	0.0506	0.0007	0.0059	0.0033	0.3425	0.4622	0	0.002	0.0184
403	3.46928e-06	0.0102135	0.000850528	2.55001e-25	0.0418421	0.863219	0.00147524	4.10184e-06	0.0240276	0.00958078	0.0823544	0.000338516	0.00336932	0.0138728	0.000308767	0.0046	0.0368	0.0283	0.027	0.0309	0.8376	0	0	0.0145	0.0033	0.0151	0.0013	0	0	0.0007
404	7.869e-18	0.267177	2.2602e-06	7.71462e-22	0.00803422	0.000192109	0.00015157	1.58148e-06	0.210147	0.205204	0.000246417	0.00188131	0.00388362	0.0642144	1.91541e-08	0.0123	0.6802	0	0.0025	0	0	0.0136	0	0.0012	0.0827	0.0469	0.0815	0.0346	0.016	0.0284
405	2.40856e-06	0.00227537	0.000732811	1.48981e-26	0.0507616	0.695048	0.00153017	2.21582e-06	0.0419639	0.016279	0.0841713	0.000964383	0.00590085	0.0307566	0.000349752	0.0059	0.0178	0.0046	0.0059	0	0.5904	0	0	0.2406	0.0099	0.1249	0	0	0	0
406	4.38804e-10	0.00265393	0.000284981	9.15373e-24	0.0588827	0.125342	0.00110524	1.12614e-05	0.629171	0.0717457	0.196458	0.00264242	0.00391202	0.0232704	2.60695e-05	0.0026	0.0184	0	0	0	0.1348	0	0	0.6174	0.0901	0.1361	0	0	0.0007	0
407	7.51805e-10	0.000596284	0.000300359	2.31864e-35	0.0109371	0.056039	0.00211952	6.26618e-05	0.177962	0.191931	0.955451	0.00487385	0.00546847	0.0498734	1.65578e-07	0.0105	0.0184	0	0.0007	0	0.0059	0	0	0.0013	0.0085	0.927	0.0197	0	0.0007	0.0072
408	1.69057e-05	0.00100067	0.000506387	1.49453e-33	0.0146906	0.0779101	0.00217308	1.11489e-05	0.268916	0.228826	0.441316	0.0103214	0.0105535	0.0647327	1.00289e-05	0.0178	0.0348	0.002	0.0039	0	0.2558	0.0007	0	0.0309	0.0151	0.6252	0.0026	0	0.0007	0.0105
409	5.29598e-08	0.00103384	0.000437443	1.29438e-35	0.0430332	0.691611	0.00262891	3.1829e-06	0.207926	0.0497535	0.0440739	0.00151958	0.00355415	0.0189817	9.59766e-06	0	0	0.0476	0	0.0952	0.8333	0	0	0.0238	0	0	0	0	0	0
410	1.45708e-06	0.00854892	0.000536079	7.22697e-28	0.0320706	0.62358	0.00206987	2.68078e-05	0.0444475	0.0210731	0.345043	0.00127514	0.00596654	0.0223111	0.000276313	0.0099	0.027	0.0085	0.0053	0	0.3636	0	0	0.1427	0.0421	0.3997	0.0007	0	0	0.0007
411	4.79147e-09	0.00552248	0.000278431	7.75805e-28	0.0157681	0.363854	0.00217521	3.14322e-05	0.114915	0.0764483	0.749738	0.00164389	0.00395198	0.0285058	1.0133e-05	0	0.0579	0	0	0	0.096	0	0	0.4655	0.0644	0.3156	0	0	0.0007	0
412	5.9706e-07	0.0129738	0.000542844	1.7606e-26	0.0364396	0.748047	0.00140401	1.30395e-05	0.0204322	0.00893325	0.264977	0.00041865	0.00423895	0.0155995	0.000238595	0	0	0.0547	0.0078	0.0156	0.9219	0	0	0	0	0	0	0	0	0
413	1.85601e-09	0.00285269	0.000416377	2.20905e-25	0.0563153	0.382923	0.00166963	1.6639e-05	0.416493	0.0437285	0.264214	0.00191801	0.00340114	0.0176171	4.35931e-05	0.0013	0.0112	0.002	0.0013	0	0.4405	0	0	0.2663	0.0243	0.2525	0.0007	0	0	0
414	5.44618e-12	0.000643469	4.04662e-05	4.85998e-44	0.00920187	0.378888	0.00262649	2.90169e-06	0.149321	0.131463	0.695506	0.00118817	0.00329491	0.0391393	6.86312e-08	0	0.002	0	0.0039	0	0.215	0.0007	0	0.0131	0	0.7508	0	0	0	0.0145
415	2.33628e-05	0.000171491	0.0027592	8.70284e-42	0.0161458	0.11781	0.00246457	9.33626e-05	0.149035	0.177746	0.934814	0.00375734	0.00546356	0.026461	9.06314e-08	0.0026	0.0526	0.002	0.002	0	0.1243	0	0	0.0026	0.0013	0.8093	0.002	0	0	0.0013
416	4.98248e-35	0.644429	1.7881e-11	2.07083e-59	0.0109769	0.001987	0.000306749	4.69806e-11	0.0625321	0.0550368	6.65463e-13	0.000724227	0.00388494	0.167874	1.66798e-10	0.0171	0.7179	0.0171	0.0043	0	0.141	0	0	0.0214	0.0085	0.0214	0.0171	0.0342	0	0
417	2.5448e-06	0.00119059	0.000872783	1.49644e-31	0.0713216	0.681176	0.00139145	2.85839e-06	0.0288872	0.00856557	0.066607	0.000818312	0.00639264	0.0241232	0.000156295	0	0.0046	0.032	0	0.0091	0.8402	0	0	0.0228	0.0046	0.0868	0	0	0	0
418	2.04169e-12	0.00391226	8.78435e-06	4.56925e-44	0.0204222	0.886013	0.00319881	9.4974e-08	0.0709727	0.0465867	0.001035	0.00058114	0.00359827	0.0374687	4.53538e-06	0.0033	0.0289	0.0348	0.0125	0.0138	0.8547	0	0	0.0434	0.0039	0.0046	0	0	0	0
419	6.47974e-14	0.00165064	0.000142519	1.07597e-21	0.058082	0.0760764	0.00126864	1.11443e-05	0.746284	0.089704	0.157017	0.00446593	0.0026337	0.0269045	3.60308e-06	0.0039	0.0565	0.002	0.0013	0	0.3912	0	0	0.3189	0.0362	0.19	0	0	0	0
420	3.05624e-06	0.00130808	0.00047372	7.42623e-44	0.0239934	0.804194	0.00295013	1.11241e-05	0.0322782	0.018235	0.382573	0.000858548	0.00470721	0.0146014	5.9393e-06	0.0007	0.0007	0.0039	0.0007	0	0.6226	0	0	0.0802	0	0.2893	0	0	0	0.002
421	9.52085e-21	0.00076	3.10326e-05	1.72944e-40	0.00267967	0.000273261	0.0014638	0.000877686	0.123823	0.172645	0.934413	0.0381811	0.00195796	0.0359343	1.53056e-12	0.0191	0.0362	0	0	0	0.0033	0.0007	0	0.0007	0.0079	0.6719	0.2518	0.0046	0	0.0039
422	3.12722e-07	0.00041227	0.00258495	1.79689e-37	0.0080874	0.0701365	0.00369209	0.000229887	0.163108	0.324293	0.879221	0.00930182	0.00347553	0.0261082	1.50684e-08	0.0013	0.0033	0	0.0079	0	0.0519	0	0	0.0085	0.0263	0.6759	0.0013	0	0.0138	0.2097
423	5.58559e-27	0.435918	5.48514e-09	5.02369e-39	0.014384	0.00045884	0.000177342	7.19285e-09	0.12456	0.0585524	6.85661e-09	0.00151681	0.00452163	0.105583	5.09898e-09	0.0164	0.8297	0	0.0009	0.0009	0.0483	0	0	0.0501	0.02	0.0155	0.0091	0.0091	0	0
424	5.52463e-06	0.00555082	0.000890494	4.6093e-25	0.0489966	0.557058	0.00128694	1.51641e-05	0.02208	0.00847059	0.337558	0.000983189	0.00726487	0.0248811	0.000745945	0	0.0059	0.002	0.0059	0.0007	0.9362	0	0	0.0316	0.0039	0.0131	0	0	0.0007	0
425	4.29108e-08	0.000916828	0.00146092	1.33353e-22	0.0659801	0.493196	0.00254649	1.20065e-05	0.390498	0.0645168	0.147974	0.0042446	0.00375856	0.0251078	7.83805e-05	0.0039	0.0631	0.0039	0.002	0.0007	0.5556	0	0	0.1453	0.0224	0.2025	0	0	0	0.0007
426	5.18211e-08	0.00302484	0.000550258	9.24044e-24	0.0357036	0.267815	0.00255973	2.51884e-05	0.314654	0.0836635	0.23915	0.00731113	0.00600981	0.0357254	0.000132682	0.002	0.1782	0.0046	0.0197	0	0.5365	0	0	0.0973	0.0145	0.144	0.0026	0	0	0.0007
427	0.000168546	6.26018e-06	0.00194422	7.60813e-55	0.0446026	0.0837931	0.00244145	5.41806e-06	0.296537	0.131386	0.407828	0.010828	0.01262	0.0464594	8.42828e-08	0.0493	0.023	0.0243	0	0	0.2571	0.0072	0	0.0112	0.0316	0.5924	0.002	0.0007	0	0.0013
428	0.00766563	0.000762761	0.0757367	1.68625e-22	0.0182268	0.433284	0.00410465	0.000128971	0.0480313	0.146202	0.226084	0.00609629	0.00208201	0.0137871	6.86171e-07	0.021	0.0296	0.1131	0.0605	0.2222	0.119	0.0118	0.0092	0.1065	0.0079	0.0112	0.1466	0.0033	0.069	0.069
429	1.96207e-07	0.0530967	0.000769012	1.74708e-18	0.00508518	0.00548931	0.0010457	5.17924e-05	0.0747452	0.461024	0.0175222	0.00761784	0.00470117	0.0523038	3.53062e-07	0.027	0.1691	0.002	0	0.0013	0.0079	0.0118	0	0.0724	0.2928	0.1882	0.15	0.0257	0.0079	0.0441
430	3.22924e-08	0.00388436	0.000337296	2.16619e-28	0.0445217	0.768899	0.00277248	4.35663e-06	0.139815	0.0362238	0.0359892	0.00163833	0.00416214	0.0235013	0.00015605	0.0026	0.0835	0.0585	0.0046	0.0039	0.6805	0	0	0.0565	0.0099	0.098	0.0013	0.0007	0	0
431	5.95245e-07	0.00573402	0.00139267	3.16556e-22	0.0465671	0.564178	0.00207698	2.55932e-05	0.18702	0.0465256	0.147861	0.00169962	0.00343703	0.0164993	0.000120497	0.0007	0.1538	0.0026	0.0191	0	0.6634	0	0	0.0901	0.0092	0.0605	0.0007	0	0	0
432	9.27979e-07	0.000215989	0.00157071	1.51565e-45	0.00736788	0.0300517	0.00680524	0.000389132	0.102799	0.321145	0.551011	0.0691357	0.00898467	0.0484951	2.22774e-08	0.0999	0.1249	0.1032	0.0158	0	0.0487	0.0184	0.0072	0.0145	0.2038	0.2939	0.0592	0.0039	0.0039	0.0026
433	0.024062	0.000199187	0.179253	2.56901e-30	0.0877749	0.282021	0.00439089	0.000652462	0.0294744	0.0267604	0.0135981	0.0196918	0.00411868	0.00872322	1.44395e-06	0.0053	0.0289	0.1433	0.1065	0.1256	0.5023	0	0	0.0565	0	0	0.0007	0	0.0171	0.0138
434	1.72894e-05	2.83162e-05	0.000754505	8.28874e-63	0.00765854	0.0132353	0.00467638	6.96711e-05	0.262483	0.435884	0.50637	0.0474299	0.0121572	0.0452071	9.10593e-10	0	0.0131	0	0	0.0026	0.0506	0	0	0.8882	0.0447	0	0	0	0.0007	0
435	5.345e-06	0.00129611	0.00147341	2.28796e-29	0.0363458	0.367445	0.00274548	4.57537e-05	0.229818	0.0684711	0.528216	0.00491463	0.00591678	0.0247775	4.79243e-05	0.0007	0.0039	0.0013	0	0	0.5431	0	0	0.3031	0.0007	0.1473	0	0	0	0
436	6.56898e-09	0.00273289	0.000396348	7.59769e-26	0.0372857	0.395654	0.00191856	2.04175e-05	0.219823	0.0416317	0.568705	0.00226238	0.00449145	0.0256409	6.02089e-05	0.0033	0.0151	0.0053	0.0013	0.0007	0.712	0	0	0.1124	0.0066	0.1433	0	0	0	0
437	4.06641e-05	0.0016686	0.00124304	4.33976e-28	0.0925661	0.481018	0.000991786	5.64557e-06	0.0220206	0.00449741	0.115946	0.00123179	0.0104194	0.0275411	0.00125408	0.0007	0.0026	0.0079	0.0178	0.0072	0.929	0	0	0.0099	0	0.025	0	0	0	0
438	3.10713e-09	0.00239533	0.000124162	1.66007e-35	0.00960945	0.230632	0.00227539	4.97733e-06	0.18815	0.210725	0.334922	0.00216548	0.00415282	0.0418194	7.03444e-07	0.0013	0.0506	0	0	0	0.1953	0	0	0.238	0.1703	0.3439	0	0	0	0.0007
439	2.10889e-05	0.000127631	0.00174393	5.11455e-81	0.000688909	0.0563336	0.0300077	0.00340422	0.00916947	0.532175	0.253883	0.0884938	0.00432236	0.0121109	2.42976e-13	0.2084	0.0611	0.046	0.0046	0.0007	0.0125	0.0401	0.002	0.0256	0.0631	0.2216	0.2209	0.0809	0.0026	0.0099
440	7.73823e-06	6.81602e-05	0.00127425	2.48742e-68	0.00419095	0.0297083	0.0130475	0.000591694	0.104163	0.408182	0.153331	0.111175	0.0077908	0.0216439	9.04144e-11	0.0868	0.0414	0	0	0	0.0013	0.0026	0	0.0105	0.1808	0.3333	0.2886	0.046	0.0079	0.0007
441	1.51352e-06	7.78507e-05	0.00559836	1.99237e-48	0.0133569	0.0872035	0.0100134	0.000650129	0.275154	0.318877	0.34933	0.0640699	0.00429244	0.0179398	4.43827e-09	0.0625	0.0493	0.0046	0.0322	0	0.044	0.0092	0	0.0703	0.048	0.3866	0.1854	0.0039	0.0085	0.0953
442	3.37738e-05	0.000462586	0.00421644	4.95818e-28	0.0735037	0.287482	0.002985	6.81305e-05	0.464043	0.0685752	0.325932	0.0118741	0.00649519	0.021475	8.92965e-05	0.0033	0.0309	0.0046	0.0007	0	0.597	0	0	0.0953	0.0092	0.259	0	0	0	0
443	3.97726e-05	0.000717136	0.00279329	1.29787e-30	0.0482873	0.29585	0.00296449	5.89865e-05	0.325861	0.0777706	0.346765	0.00841131	0.00646634	0.0223832	4.0407e-05	0.0007	0.0316	0.0079	0.0007	0	0.6121	0	0	0.1197	0.0092	0.2183	0	0	0	0
444	5.55662e-06	0.00158054	0.00137331	8.18605e-28	0.0369297	0.340353	0.00271393	4.50436e-05	0.225691	0.0679776	0.483645	0.00581344	0.00657	0.0280533	9.01727e-05	0.0007	0.0099	0.0026	0	0.0013	0.6292	0	0	0.2058	0.0039	0.1466	0	0	0	0
445	1.36454e-06	0.00215307	0.000990377	2.82899e-28	0.0490776	0.455964	0.00254994	3.32669e-05	0.25837	0.0457383	0.286455	0.00395713	0.00562781	0.0210245	0.000136121	0.0013	0.0125	0.0072	0.0007	0	0.7646	0	0	0.0736	0.0007	0.1394	0	0	0	0
446	0.000175537	3.61073e-06	0.00250131	1.09243e-57	0.0432996	0.015468	0.00221655	1.11723e-05	0.263043	0.214294	0.220144	0.0238868	0.0182281	0.0660326	1.33514e-08	0.021	0.0434	0.0164	0.0506	0	0.0256	0.0158	0.0013	0.0927	0.2354	0.2209	0.2038	0.0085	0.0178	0.0467
447	1.0089e-07	0.000231882	0.000114436	1.27833e-81	0.000387957	0.00558104	0.0120871	0.000459794	0.0109994	0.608548	0.333959	0.0850742	0.00854616	0.0367269	2.37298e-13	0.0743	0.0184	0	0	0	0	0.0191	0	0	0.3563	0.1269	0.265	0.1282	0.0033	0.0085
448	0.000552334	0.000173941	0.0720671	1.11882e-20	0.223019	0.0686501	0.00127603	0.000134252	0.117666	0.0300843	0.0158633	0.00939864	0.00678631	0.0202517	2.38753e-05	0	0.0342	0.0855	0.0487	0.6923	0.1315	0	0	0.0066	0	0	0	0	0.0013	0
449	6.10262e-06	0.000118336	0.009396	1.62209e-29	0.204747	0.0297315	0.00144909	0.000245651	0.516146	0.0741613	0.127123	0.0136762	0.0101597	0.0265448	1.30138e-05	0.0013	0	0.0664	0	0.931	0.0013	0	0	0	0	0	0	0	0	0
450	7.29511e-10	0.00143145	6.8537e-05	2.39792e-42	0.0210406	0.868054	0.00388371	1.14935e-06	0.0400497	0.0324639	0.0463395	0.00102506	0.00445433	0.0324145	6.66066e-06	0	0.0053	0.0033	0.0066	0.0039	0.908	0	0	0.0118	0.0007	0.0605	0	0	0	0
451	7.51823e-05	0.000492975	0.00107983	1.20521e-38	0.0678761	0.570575	0.00194035	5.15785e-06	0.0786649	0.0129813	0.0945482	0.00242698	0.00858041	0.0213625	9.04353e-05	0.002	0.0099	0.0066	0.0013	0.0039	0.7916	0	0	0.071	0.002	0.1118	0	0	0	0
452	3.24646e-07	0.000693739	0.00146471	9.30374e-27	0.0616151	0.461447	0.00263877	2.25148e-05	0.223197	0.0402665	0.349793	0.0048827	0.00567926	0.0279721	0.000104358	0.0125	0.0736	0.0184	0.0059	0	0.5306	0.0013	0	0.1795	0.0723	0.1045	0.0013	0	0	0
453	7.06024e-06	1.67214e-05	0.000734912	2.0665e-61	0.0100032	0.0139417	0.00416664	4.00743e-05	0.249199	0.405645	0.518308	0.0415479	0.0134319	0.0584449	1.46724e-09	0.0105	0.0289	0.0007	0.0072	0.0033	0.0217	0.002	0	0.0454	0.449	0.2268	0.0585	0.0131	0.0559	0.0769
454	7.96022e-08	0.000115307	0.000386345	2.72138e-76	0.00107534	0.0160781	0.0192136	0.00128617	0.0219061	0.45136	0.261819	0.160457	0.00742335	0.0259889	2.21336e-12	0.0835	0.025	0.0013	0.0125	0	0.0105	0.0158	0	0.0013	0.2209	0.2308	0.2945	0.0881	0.0026	0.0131
455	7.65507e-06	0.000188459	0.0693614	4.80199e-38	0.024281	0.0537409	0.0102752	0.0193712	0.163618	0.254315	0.241981	0.0822498	0.00280396	0.00856002	4.00142e-09	0.0736	0.0487	0.0506	0.0283	0	0.0769	0.0092	0	0.098	0.05	0.2163	0.1216	0.0217	0.0151	0.19
456	3.91358e-10	0.0286915	0.000647164	4.18778e-18	0.00716092	0.00467173	0.00175115	0.000217611	0.130751	0.360739	0.0269182	0.0274115	0.00428956	0.0466655	2.70853e-07	0.0046	0.2505	0	0.0039	0.0007	0.0053	0.0007	0	0.0283	0.4707	0.0723	0.0776	0.0631	0.0164	0.0059
457	9.39975e-06	0.000427295	0.00152861	3.73511e-35	0.0295909	0.248794	0.0031661	4.72942e-05	0.298723	0.103166	0.676545	0.00832299	0.00672081	0.0280052	8.28964e-06	0.0013	0.0486	0.0061	0.0088	0	0.5574	0	0	0.0655	0.0128	0.2996	0	0	0	0
458	8.27596e-06	0.000679025	0.000954592	6.48446e-33	0.0577717	0.597178	0.0024482	7.01365e-06	0.0795245	0.0199897	0.15863	0.00336782	0.00849608	0.0316777	0.000212984	0.0033	0.0348	0.0085	0.0007	0	0.6134	0	0	0.0986	0.0131	0.2275	0	0	0	0
459	1.52482e-07	0.000375459	0.000625685	1.46097e-40	0.0243655	0.433972	0.0034093	1.66405e-05	0.206521	0.102115	0.473441	0.00320402	0.00457495	0.024849	1.03267e-06	0.0053	0.0046	0.0039	0.0007	0	0.5306	0	0	0.0625	0.0493	0.3327	0.0079	0.0026	0	0
460	2.69196e-11	0.127615	5.95898e-05	1.15148e-23	0.00367938	0.000275003	0.000796367	7.78615e-05	0.108644	0.525914	0.00215168	0.0310787	0.00850919	0.0889667	6.32549e-08	0.0069	0.3846	0	0.0179	0.0014	0.0158	0	0	0.1902	0.3599	0	0.0089	0.0103	0.0041	0
461	1.8643e-05	0.000445016	0.00303948	1.98954e-28	0.0710198	0.339754	0.00251305	3.80482e-05	0.235318	0.0417682	0.386713	0.00716126	0.00754888	0.0274632	0.000123279	0.0007	0.026	0.0022	0.0007	0	0.4023	0	0	0.0389	0.0036	0.5256	0	0	0	0
462	1.31652e-07	0.000841415	0.000761464	1.13468e-30	0.0703342	0.653103	0.0025013	4.67719e-06	0.265044	0.0315004	0.0514898	0.00274681	0.00438363	0.0201722	7.34197e-05	0.0007	0.0625	0.0224	0.0151	0.0007	0.7449	0.0007	0	0.0717	0.0033	0.0782	0	0	0	0
463	3.97066e-09	0.000115174	0.00168964	9.05737e-36	0.0451639	0.0977625	0.00370103	5.21049e-05	0.698475	0.198163	0.206693	0.0213892	0.00373618	0.0225451	2.2348e-07	0.0151	0.0283	0.0158	0.0013	0.0007	0.2893	0	0	0.2137	0.1506	0.2821	0.0033	0	0	0
464	0.000181892	1.35451e-05	0.000896112	1.51582e-62	0.0124971	0.0255528	0.0043096	2.33425e-05	0.433355	0.439354	0.500193	0.0353528	0.013489	0.048626	4.16163e-09	0.1105	0.0381	0.0013	0	0	0.1177	0.0053	0.0007	0.0763	0.1269	0.3386	0.1427	0.0421	0	0
465	2.05129e-06	0.000837654	0.0102922	1.85389e-17	0.109641	0.288688	0.0029101	0.00017125	0.273771	0.0515233	0.153156	0.0118373	0.00519962	0.0231794	0.000216258	0.0013	0	0.0592	0	0.9257	0.0138	0	0	0	0	0	0	0	0	0
466	4.2998e-07	0.00101108	0.000994546	6.44356e-30	0.0613053	0.589363	0.00262863	1.46127e-05	0.159447	0.0314138	0.172958	0.00300513	0.0056025	0.0241	0.000103122	0	0.0056	0.0216	0	0.0056	0.9025	0	0	0.0262	0	0.0384	0	0	0	0
467	1.39126e-06	0.00026918	0.00739728	1.75323e-18	0.190562	0.100564	0.00178095	7.03758e-05	0.232624	0.041564	0.076485	0.0152212	0.0111937	0.0508981	0.000490126	0.0007	0	0.1183	0	0.8534	0.027	0	0	0.0007	0	0	0	0	0	0
468	0.000281139	3.46439e-05	0.011191	3.34468e-24	0.221613	0.0768977	0.00153826	6.4499e-06	0.147662	0.0330377	0.0189098	0.026885	0.0214156	0.0956791	0.000590727	0.0072	0.0072	0.1986	0.0026	0.3905	0.3182	0	0	0.0651	0	0.0013	0.0026	0	0.0033	0.0033
469	9.70277e-12	0.000560074	0.000801191	3.05418e-51	0.00366549	0.000991206	0.00460016	0.00391169	0.181728	0.417341	0.172267	0.134644	0.00327642	0.0165867	5.64863e-12	0.0079	0.0618	0	0.0007	0	0.0191	0.0007	0	0.3879	0.4984	0.0039	0.0178	0.002	0	0
470	8.7827e-06	0.00318548	0.00208989	1.80383e-22	0.0615428	0.639176	0.00169257	1.03548e-05	0.0635932	0.0226423	0.0938594	0.0012472	0.00484296	0.0222114	0.000347482	0.0052	0.0079	0.0026	0.0105	0	0.8325	0	0	0.0576	0	0.0838	0	0	0	0
471	5.94054e-10	0.00145299	0.000257714	2.07034e-32	0.0504191	0.601924	0.0029166	2.85683e-06	0.352609	0.0792437	0.00877611	0.00241165	0.00314812	0.0223559	8.8294e-06	0	0.1596	0	0.0914	0	0.5895	0	0	0.1169	0.0049	0.0378	0	0	0	0
472	1.81062e-07	0.000138854	0.00720806	1.39722e-22	0.161226	0.118528	0.0028877	0.000117318	0.246058	0.0554792	0.0862483	0.0257908	0.00981463	0.0491257	9.47415e-05	0.0013	0	0.0736	0.0007	0.8718	0.0526	0	0	0	0	0	0	0	0	0
473	7.47028e-05	1.56069e-05	0.0222189	3.47969e-29	0.274117	0.117878	0.00266587	1.86412e-05	0.253163	0.0463634	0.00688309	0.0381225	0.0138307	0.0544523	6.11131e-05	0	0	0.0813	0	0.8211	0.0976	0	0	0	0	0	0	0	0	0
	8.33574	11.2147	7.23558	0.0144075	32.2054	56.2085	1.79593	3.05694	65.1036	70.9913	134.164	27.9715	4.09357	18.9166	0.253086	29.4454	24.4741	13.0315	10.9031	48.4984	64.1947	2.5176	11.4994	54.8354	49.9239	52.3748	59.8645	7.1289	22	22.3063
[truncated: 5 more columns]

## Sheet: Mixedpixel_forDoreen
No	Ground class (reference)	Mapped class proportion per pixel
		X0	X1	X2	X3	X4	X5	X6	X7	X8	X9	X10	X11	X12	X13	X14
1	Sparse birch forest (X4)	7.48078e-06	0.0002118	0.00187507	4.60251e-37	0.273101	0.161952	0.00066313	2.74265e-06	0.0826921	0.00714848	0.00178717	0.00146245	0.0110748	0.0225675	4.69175e-05
2	Sparse birch forest (X4)	2.6057e-09	9.01997e-05	0.00090589	9.68546e-46	0.254719	0.0260928	0.000974116	4.91371e-05	0.468518	0.0226591	0.00914812	0.00524218	0.00856064	0.0146759	4.6171e-07
3	Sparse birch forest (X4)	0.0010174	0.000139201	0.0147562	8.49086e-23	0.250831	0.0242603	0.000894633	2.97876e-05	0.152647	0.0229487	0.0147139	0.0200127	0.0208048	0.0547617	0.000501073
4	Dwarf shrub subsiding (X14)	0.000365446	0.00137538	0.00502563	5.25746e-18	0.0968589	0.155942	0.000983568	4.39923e-05	0.0228008	0.00937161	0.462838	0.00418087	0.0161654	0.0524172	0.00410147
5	Dwarf shrub subsiding (X14)	0.000361668	0.000441633	0.00732397	1.61084e-16	0.250808	0.112561	0.000711483	9.55431e-06	0.0620295	0.00757451	0.0388684	0.00571954	0.0186869	0.0572484	0.0107473
6	Sparse birch forest (X4)	0.00108109	0.000643906	0.0135484	9.41451e-17	0.172945	0.167109	0.00115258	6.43474e-05	0.0650636	0.0122487	0.228361	0.00640003	0.0138133	0.0396037	0.00436557
7	Sparse birch forest (X4)	0.0107866	0.00105195	0.070898	1.13274e-11	0.220338	0.18035	0.00110497	0.000192468	0.0202715	0.00503753	0.0633377	0.00705248	0.0101697	0.0224732	0.00412745
8	Dwarf shrub subsiding (X14)	0.000404934	0.000496364	0.0111373	3.23248e-18	0.128197	0.167317	0.00146306	7.97677e-05	0.0599525	0.0173398	0.412588	0.00818482	0.0139311	0.047693	0.00205958
9	Dwarf shrub subsiding (X14)	2.23884e-05	0.000569912	0.00636262	2.57822e-19	0.115152	0.172145	0.00150846	5.63393e-05	0.119695	0.0285448	0.322248	0.0065383	0.0101224	0.0416819	0.000626583
10	Sparse birch forest (X4)	0.00698111	0.000439121	0.0315903	1.13323e-16	0.264893	0.0934465	0.000610503	1.73518e-05	0.0174508	0.00322777	0.0108522	0.00559869	0.0144296	0.0324618	0.00252153
11	Sparse birch forest (X4)	3.78251e-05	0.000398819	0.010961	3.07059e-24	0.265367	0.0159652	0.000966057	7.67178e-05	0.203409	0.0324593	0.00149409	0.0195779	0.0148613	0.0343246	9.73648e-05
12	Sparse birch forest (X4)	0.000115888	0.000107816	0.00104318	9.19901e-39	0.261646	0.0306169	0.000299806	9.61808e-07	0.0601302	0.00350732	0.0084201	0.0022249	0.026822	0.0442877	0.000155822
13	Sparse birch forest (X4)	0.000329825	6.95296e-05	0.00109577	3.17496e-39	0.210641	0.00961565	0.00031853	2.15482e-06	0.111632	0.00792501	0.038	0.00520596	0.0372224	0.0643412	0.000105268
14	Sparse birch forest (X4)	0.000314183	0.000130838	0.0010634	6.05938e-41	0.246801	0.0273743	0.000338456	2.32736e-06	0.078955	0.00445763	0.0153953	0.00244941	0.0282583	0.0379821	0.000126943
15	Dwarf shrub subsiding (X14)	0.00275644	0.000128427	0.0123519	6.35562e-16	0.259918	0.0634629	0.000481754	1.88395e-06	0.0599906	0.00855133	0.0272748	0.00590721	0.0204182	0.0806057	0.0051902
16	Sparse birch forest (X4)	0.00036121	0.000110687	0.00210138	1.36019e-26	0.107798	0.0317551	0.000912795	4.86564e-06	0.0674069	0.0230479	0.197748	0.0177108	0.0376106	0.147221	0.00136314
17	Sparse birch forest (X4)	0.000129408	0.00105139	0.00382598	2.06832e-24	0.315367	0.0454481	0.000326706	5.34655e-06	0.0768039	0.00630098	0.0014543	0.00159313	0.0139003	0.0261392	0.00062958
18	Moist moss (X11)	1.71898e-05	0.000217134	0.000759998	7.65309e-54	0.00608931	0.00452359	0.00435114	0.000324836	0.050147	0.352764	0.278019	0.091726	0.0218836	0.081361	1.00025e-08
19	Moist moss (X11)	0.000166643	0.000119452	0.00144918	2.45432e-46	0.0210012	0.0275992	0.00358636	7.32682e-05	0.17797	0.230102	0.270498	0.0417182	0.0184144	0.0651481	5.99667e-07
20	Dwarf shrub subsiding (X14)	0.000284171	0.00953747	0.00595719	1.08242e-13	0.0746786	0.496445	0.00171877	8.39595e-05	0.117485	0.0210532	0.232181	0.00298951	0.00554079	0.0171855	0.00478383
21	Sparse birch forest (X4)	5.2158e-05	0.000262867	0.00368778	5.25115e-29	0.280126	0.14781	0.000591809	2.64217e-06	0.0549134	0.00571125	0.00295114	0.00201884	0.0129432	0.0311224	0.000336867
22	Anthropogenic (X0)	0.123325	0.000127899	0.00518364	3.04772e-72	0.416898	0.000402768	7.00796e-05	1.00198e-05	0.083253	0.00309588	2.31632e-06	0.000600657	0.0141284	0.00219143	6.21044e-10
23	Sparse birch forest (X4)	0.000391886	6.77353e-05	0.00384382	6.31668e-35	0.278037	0.0692861	0.000361393	1.19891e-06	0.0502334	0.00358675	0.012194	0.0017143	0.0165552	0.0329259	9.1753e-05
24	Moist moss (X11)	7.27522e-05	0.000187191	0.00365044	4.5932e-37	0.0299654	0.0175056	0.00325828	0.000402039	0.081515	0.14941	0.468166	0.0545868	0.0211525	0.0771557	2.88843e-06
25	Sparse birch forest (X4)	0.000562124	8.56454e-05	0.00737983	5.52875e-29	0.256436	0.163516	0.000830206	8.12711e-06	0.0498286	0.00397312	0.0816022	0.00488472	0.0175956	0.0373093	0.000879559
26	Sparse birch forest (X4)	0.000478046	2.46193e-05	0.00798363	2.83846e-32	0.254247	0.0515489	0.00113727	8.8071e-06	0.117611	0.0119121	0.0319325	0.0218303	0.0255479	0.0630565	0.000251968
27	Dwarf shrub subsiding (X14)	0.000226474	0.00010569	0.00261452	1.04849e-20	0.265052	0.0451136	0.000389805	6.79854e-07	0.0385429	0.00339325	0.0312104	0.00733344	0.0361818	0.120435	0.0151112
28	Sparse birch forest (X4)	6.5015e-05	9.37102e-05	0.0025108	5.84421e-38	0.374941	0.0877395	0.000276035	5.39242e-07	0.0851872	0.00365551	0.00116808	0.000671505	0.0117164	0.0205191	3.31578e-05
29	Sparse birch forest (X4)	0.00236414	0.000252766	0.00652328	1.90981e-20	0.245322	0.0602538	0.000341428	1.47619e-06	0.036657	0.00530148	0.0170858	0.00250852	0.0198984	0.0600138	0.00257049
30	Sparse birch forest (X4)	0.000103943	1.13631e-05	0.000942483	2.88236e-50	0.0989421	0.00205256	0.000455397	1.13559e-06	0.0866947	0.0302815	0.0119996	0.0176213	0.0424421	0.110336	5.46073e-07
31	Moist moss (X11)	7.103e-07	0.000229145	0.00616502	3.794e-52	0.0172128	0.0078504	0.0136498	0.0346088	0.030574	0.14275	0.0501665	0.395236	0.0153127	0.0276044	7.91594e-09
32	Dwarf shrub (X13)	5.52059e-05	0.000223274	0.00487893	9.88807e-32	0.069758	0.102676	0.00257284	0.000170897	0.139725	0.0605831	0.497426	0.0149449	0.0129947	0.0422495	3.36736e-05
33	Anthropogenic (X0)	0.184015	0.00022135	0.0366899	1.34607e-56	0.272615	0.00197297	0.000259062	0.000176607	0.0838985	0.0122966	5.30953e-05	0.00177862	0.00794514	0.00266887	2.78483e-09
34	Anthropogenic (X0)	0.638457	0.00299149	0.0529896	1.42777e-74	0.0772899	0.00136918	0.000217069	0.00230247	0.00390092	0.00744147	6.91449e-06	0.000242782	0.00276346	0.000359075	5.92782e-13
35	Anthropogenic (X0)	0.65942	0.00978917	0.0288098	1.25241e-84	0.0190465	0.00064985	0.000123711	0.00216217	0.000946498	0.0140943	1.379e-05	3.31445e-05	0.00143941	0.000198014	1.38235e-15
36	Dwarf shrub (X13)	0.000385292	0.000244538	0.00267279	1.76393e-30	0.061503	0.0669244	0.00135385	2.28212e-05	0.105632	0.0452615	0.475888	0.00936735	0.0179731	0.0648413	0.000106405
37	Dwarf shrub subsiding (X14)	0.000589237	0.00025847	0.00977973	1.61444e-17	0.218096	0.142763	0.000900711	8.99284e-06	0.0742708	0.0113303	0.0593832	0.00665883	0.0163935	0.0584691	0.00496822
38	Dwarf shrub subsiding (X14)	0.00302272	0.000940246	0.0225429	4.50729e-14	0.195407	0.384346	0.00119091	2.24799e-05	0.105686	0.013054	0.045358	0.00358403	0.00732831	0.0226359	0.00426153
39	Sphagnum wetland (X9)	0.00123064	0.00498667	0.00212944	3.68031e-47	0.00192377	0.00939266	0.0041936	0.00118073	0.0463363	0.606608	0.292735	0.0240505	0.00666109	0.0256891	1.83101e-09
40	Sphagnum wetland (X9)	0.00552231	0.000449386	0.00283051	9.68243e-35	0.0472768	0.0437683	0.00138877	6.00544e-05	0.140267	0.06632	0.486577	0.00970363	0.0182461	0.0455256	4.22846e-05
41	Dwarf shrub subsiding (X14)	0.000164861	0.000241935	0.00485441	3.0421e-17	0.219693	0.135185	0.00076509	3.57342e-06	0.0526245	0.00795934	0.0578649	0.0064063	0.0214695	0.0852279	0.0125767
42	Sparse birch forest (X4)	0.00176155	0.000173207	0.00590862	1.04279e-25	0.13373	0.0114173	0.000432331	4.75936e-06	0.0477541	0.0185437	0.029425	0.00752386	0.0242143	0.0803695	0.000124994
43	Sparse birch forest (X4)	0.000184577	0.000500749	0.0105674	1.2799e-22	0.11384	0.0464648	0.00132388	9.45591e-05	0.0815749	0.0415648	0.0638118	0.0117142	0.0135095	0.0463545	0.000119789
44	Dwarf shrub (X13)	0.00522642	0.000206457	0.00241925	8.75746e-38	0.0676762	0.0432693	0.00105849	1.7266e-05	0.145409	0.0364305	0.266386	0.00837013	0.0195727	0.0431015	3.82818e-05
45	Willow wetland (X8)	0.00463438	0.00024268	0.00879659	1.26532e-14	0.301476	0.090453	0.000298022	5.89876e-07	0.0374595	0.00419466	0.0118264	0.00220397	0.0195835	0.0709152	0.0143488
46	Anthropogenic (X0)	0.272858	0.00901486	0.0176334	9.31214e-85	0.00271983	0.0413976	0.00143847	0.00337529	0.00119094	0.0405018	0.000939959	0.000173232	0.000716394	0.000228999	3.52275e-15
47	Anthropogenic (X0)	0.0619738	0.000274456	0.0191443	1.2774e-20	0.318602	0.0102859	0.000151021	1.93337e-06	0.0344487	0.00394247	0.00309883	0.00213596	0.0192764	0.0378806	0.000478844
48	Sparse birch forest (X4)	0.00281629	0.00079812	0.00556838	1.06587e-19	0.326879	0.0961657	0.000230639	1.24056e-06	0.0292989	0.00247716	0.00462847	0.000838241	0.0158802	0.0340636	0.00563356
49	Willow wetland (X8)	0.000183608	0.00018843	0.00226652	6.00528e-18	0.304772	0.0988603	0.000321147	3.89711e-07	0.0236228	0.00156384	0.0283491	0.00344239	0.0318716	0.102299	0.0583359
50	Anthropogenic (X0)	0.248662	0.00129865	0.0970052	3.3724e-10	0.361862	0.0351093	0.000352817	5.4067e-05	0.0564306	0.00660159	0.00479521	0.00356408	0.0113828	0.0190914	0.00324033
51	Anthropogenic (X0)	0.075496	0.000602887	0.0580451	6.36774e-17	0.162973	0.0270936	0.000346407	1.78759e-05	0.0161714	0.00913131	0.0144419	0.00246533	0.0101269	0.0275134	9.1421e-05
52	Sparse birch forest (X4)	1.71651e-07	0.00413636	0.00179293	3.33053e-22	0.343611	0.0616363	0.000380823	2.1054e-05	0.126235	0.00573324	0.00109314	0.00112259	0.0081301	0.0146631	0.000405498
53	Dwarf shrub subsiding (X14)	3.1819e-12	0.00034533	4.83088e-05	8.60761e-56	0.330937	0.0152072	0.000392496	2.3233e-06	0.443613	0.0121595	3.18837e-05	0.00105278	0.00837671	0.0117843	9.47238e-08
54	Dwarf shrub subsiding (X14)	2.78119e-05	0.00036587	0.000981013	1.00769e-27	0.15509	0.211467	0.000678674	1.15293e-06	0.0246579	0.00369085	0.0387123	0.0027633	0.0213199	0.0660336	0.00357214
55	Anthropogenic (X0)	0.00575736	3.68587e-05	0.005617	5.01268e-54	0.394678	0.00355804	0.00014142	2.39886e-06	0.16571	0.00616812	0.00021023	0.00103744	0.0139324	0.00906343	9.24871e-08
56	Sparse birch forest (X4)	0.11742	0.000371152	0.0230154	6.88359e-69	0.178145	0.000792673	0.000289851	0.000606446	0.0459689	0.0138211	1.41908e-05	0.00193585	0.00749057	0.00152997	5.81213e-11
57	Dwarf shrub subsiding (X14)	3.62701e-20	7.16217e-05	1.11297e-07	8.55358e-86	0.255763	0.0298603	0.000417363	2.60546e-09	0.500532	0.0186789	2.19921e-08	0.000280323	0.0072859	0.0239521	1.25059e-10
58	Willow wetland (X8)	0.000112011	0.000544043	0.00213097	4.53343e-24	0.276464	0.123354	0.000325067	9.91861e-07	0.0335094	0.00296158	0.00695056	0.0011137	0.0170849	0.0426639	0.00314145
59	Anthropogenic (X0)	0.00701848	0.000289674	0.0128754	2.03289e-21	0.102788	0.0191347	0.000158917	9.83382e-07	0.00474467	0.00360106	0.0539587	0.000884564	0.0124967	0.0479709	3.40523e-05
60	Anthropogenic (X0)	0.0141485	0.000290752	0.0185182	8.70679e-26	0.352442	0.0309596	0.000197242	5.34971e-06	0.0716177	0.00439905	0.00726751	0.000872786	0.0108509	0.0163352	0.000106964
61	Sparse birch forest (X4)	0.0624523	0.00051439	0.0122853	4.11977e-32	0.395115	0.00628283	0.000135911	9.38304e-06	0.0801702	0.00378727	0.000957759	0.00128874	0.0167914	0.0133979	5.19483e-05
62	Anthropogenic (X0)	0.0536685	0.000703075	0.0835568	1.27458e-18	0.0954807	0.0430617	0.00095459	0.00016066	0.0147965	0.0188583	0.0424004	0.00773976	0.00911509	0.025704	3.72927e-05
63	Anthropogenic (X0)	0.0375557	0.000771055	0.0673299	4.81282e-12	0.207849	0.102561	0.000679392	7.60875e-05	0.0559261	0.0121781	0.0986875	0.00350578	0.0088401	0.023333	0.00127159
64	Anthropogenic (X0)	0.0255965	0.00105582	0.0394734	4.9378e-11	0.195288	0.104211	0.000628213	3.92973e-05	0.0396683	0.00986818	0.0749954	0.00360724	0.0111552	0.0319311	0.00383689
65	Sparse birch forest (X4)	0.000252058	0.0017671	0.00431832	8.27696e-21	0.405781	0.0389389	0.000250756	3.70743e-06	0.0891216	0.00542059	0.000323488	0.00137591	0.0145541	0.0253278	0.00210993
66	Sparse birch forest (X4)	0.0357679	0.000276341	0.00902826	1.65351e-24	0.342345	0.0108761	0.000123051	1.81983e-06	0.0643176	0.00359373	0.0100653	0.00119315	0.0204599	0.0322395	0.000531698
67	Sparse birch forest (X4)	0.00840956	0.0053211	0.031294	1.28043e-09	0.258245	0.0831716	0.000496894	0.000367764	0.081851	0.00762254	0.179994	0.00192298	0.0094743	0.0150716	0.00833859
68	Sparse birch forest (X4)	1.41426e-05	0.00200412	0.00141207	7.86576e-25	0.39793	0.0513789	0.000258253	2.51807e-06	0.106607	0.00471366	0.000352764	0.00101763	0.0149327	0.0251969	0.00184001
69	Sparse birch forest (X4)	0.178628	0.00270424	0.109046	4.75653e-60	0.0132468	0.323515	0.00481978	0.0071393	0.00228287	0.0138496	0.00247826	0.00250169	0.00117108	0.000607365	5.21223e-11
70	Anthropogenic (X0)	0.126155	0.00557011	0.174615	1.07339e-12	0.0820767	0.0278071	0.00194981	0.00587379	0.0130019	0.0259673	0.0169568	0.0354782	0.00958207	0.0179901	0.000135222
71	Willow wetland (X8)	0.0196082	0.000128001	0.0122192	2.45001e-34	0.111245	0.0167052	0.000194161	1.31736e-06	0.0147603	0.00623457	0.0170742	0.00086315	0.0100547	0.024054	1.35412e-06
72	Anthropogenic (X0)	0.0257175	0.00934865	0.256217	0.0143354	0.171224	0.149479	0.00105076	0.00736082	0.052293	0.0158776	0.398702	0.00272719	0.00367385	0.00711694	0.000884439
73	Anthropogenic (X0)	0.177147	0.00633039	0.185605	2.72685e-12	0.0906951	0.0285502	0.0014646	0.00398258	0.0105646	0.018703	0.0140538	0.0214154	0.00868819	0.0153281	0.000126597
74	Exposed rock (X2)	0.0427008	0.000286999	0.0789466	9.6857e-11	0.212626	0.0820454	0.000721941	2.32539e-05	0.0427392	0.0152437	0.0422506	0.00631427	0.0113702	0.0436412	0.00146344
75	Sedge wetland (X10)	0.00533395	0.000680372	0.0358579	1.48727e-14	0.126439	0.0966837	0.0011989	0.000128721	0.0571949	0.0270811	0.204049	0.00768667	0.0106734	0.0374287	0.000686495
76	Anthropogenic (X0)	0.0237295	0.00624669	0.151083	3.92886e-26	0.0248227	0.351175	0.00545433	0.00535422	0.00607011	0.016851	0.0247712	0.0161922	0.00239178	0.00395566	1.07657e-06
77	Anthropogenic (X0)	0.342648	0.0270962	0.123313	9.51367e-34	0.0266874	0.156225	0.00410516	0.0165185	0.00545357	0.0137515	0.00182245	0.014797	0.00291075	0.00194271	4.10951e-07
78	Exposed rock (X2)	0.255795	0.0150868	0.15127	1.05917e-28	0.0145014	0.0840846	0.00710506	0.0406654	0.0264898	0.13033	0.020988	0.0429334	0.00308133	0.00439595	2.46687e-07
79	Shadow (X3)	0.000182701	0.0023105	0.0345004	5.95607e-11	0.1548	0.0677716	0.00141894	0.00102343	0.0796314	0.0240799	0.14474	0.0119333	0.00912106	0.0252651	0.00100672
80	Sparse birch forest (X4)	5.45217e-06	0.00319758	0.0255348	4.17817e-11	0.0505506	0.05208	0.00321123	0.00517412	0.124217	0.0959278	0.583022	0.0352346	0.00633555	0.0286623	8.34661e-05
81	Anthropogenic (X0)	0.753859	0.0034804	0.105088	1.61177e-61	0.0198094	0.124148	0.00233769	0.00451494	0.0100186	0.0263098	0.000869472	0.00131067	0.00121861	0.000464426	3.2097e-11
82	Exposed rock (X2)	0.00100131	0.00201354	0.0997268	9.47073e-18	0.0426379	0.0496985	0.00484235	0.0134173	0.0516588	0.108019	0.187257	0.0609091	0.00620301	0.0193254	8.99139e-06
83	Shadow (X3)	0.00103798	0.00067341	0.058205	3.53142e-16	0.0585077	0.0402877	0.00310183	0.00108534	0.0282424	0.0748389	0.110635	0.0541317	0.0115304	0.0521685	5.42641e-05
84	Sparse birch forest (X4)	0.00167823	0.000635812	0.087835	2.43418e-10	0.135948	0.129793	0.00250774	0.000566791	0.0550432	0.03821	0.100657	0.0247635	0.00915367	0.0373844	0.000773876
85	Sparse birch forest (X4)	1.29085e-05	0.00256196	0.0552971	1.45321e-07	0.0810701	0.0865339	0.00289983	0.00435436	0.0873387	0.0677166	0.402551	0.0228551	0.00556921	0.0258873	0.000167301
86	Sedge wetland (X10)	1.34375e-06	0.0174953	0.0169413	2.91547e-08	0.0284598	0.0234911	0.00283952	0.0215192	0.088446	0.12369	0.756092	0.0322843	0.0058826	0.0261972	5.27736e-05
87	Sedge wetland (X10)	0.00325784	0.00374885	0.135139	1.25684e-10	0.0542701	0.132964	0.00208827	0.0088146	0.0389165	0.0584725	0.854854	0.00501472	0.0038441	0.0130158	3.33483e-05
88	Willow wetland (X8)	4.49053e-06	0.0028561	0.0615901	8.01809e-10	0.0444523	0.0470875	0.00370805	0.0250825	0.0706004	0.100629	0.838522	0.0336451	0.00502543	0.0234895	2.10107e-05
89	Exposed rock (X2)	2.91557e-05	0.00242841	0.0801075	1.92201e-07	0.0891763	0.0703176	0.00324983	0.0096712	0.0832363	0.0581046	0.422068	0.0361995	0.00616238	0.0237922	0.00020711
90	Moist moss (X11)	5.68233e-06	0.00145139	0.0476394	6.87963e-09	0.0821608	0.0913283	0.00313368	0.00303815	0.0935953	0.0697958	0.452028	0.0264293	0.00590604	0.0305441	0.000134886
91	Sedge wetland (X10)	2.94222e-07	0.0230093	0.00766847	1.18193e-09	0.0147251	0.0194891	0.00359278	0.0171072	0.0655726	0.154394	0.823997	0.0538566	0.00672225	0.0372573	3.71954e-05
92	Sedge wetland (X10)	0.0418842	0.000195546	0.0674714	6.2777e-29	0.0695693	0.0445363	0.000872822	0.000124979	0.0455195	0.0513771	0.264297	0.00261981	0.00571996	0.0171731	6.24125e-07
93	Sedge wetland (X10)	3.24918e-06	0.00171839	0.0368394	2.94837e-09	0.0732534	0.0660209	0.0027648	0.00262369	0.0811563	0.0767722	0.417679	0.0241166	0.0062352	0.0342307	9.32061e-05
94	Willow wetland (X8)	2.22639e-05	0.00100426	0.019524	3.42168e-19	0.0466158	0.0951258	0.00125232	0.000640258	0.100138	0.0756097	0.94354	0.00203004	0.00393582	0.0191525	4.38668e-06
95	Sedge wetland (X10)	3.26341e-15	0.00761465	0.00114636	7.40704e-14	0.0166255	0.00132367	0.000926764	0.0099213	0.186267	0.109986	0.955537	0.0121743	0.00207469	0.0204747	1.32849e-08
96	Sedge wetland (X10)	6.55277e-12	0.00751522	0.00316138	1.72628e-19	0.00876917	0.00212243	0.00259723	0.0322274	0.084445	0.184997	0.879655	0.0577813	0.00331124	0.0237659	1.68946e-08
97	Sedge wetland (X10)	3.87631e-09	0.00139478	0.00959678	1.13219e-13	0.0525183	0.0297512	0.00119075	0.00167513	0.280909	0.0982267	0.954213	0.00427054	0.00285081	0.0189743	1.71119e-06
98	Dry lichen subsiding (X7)	4.58418e-09	0.00167703	0.0126274	2.91537e-34	0.0122786	0.00221515	0.00535448	0.102093	0.0486932	0.224011	0.289087	0.144531	0.00493351	0.0168818	1.65226e-09
99	Willow wetland (X8)	8.45642e-07	0.00604914	0.0228104	3.48394e-12	0.0258519	0.0200208	0.0048725	0.0229038	0.0647081	0.149114	0.470233	0.101423	0.00697073	0.0344911	1.57717e-05
100	Willow wetland (X8)	5.86023e-06	0.00169703	0.0337537	4.64717e-10	0.0871788	0.0845972	0.00352996	0.0068232	0.105143	0.0554801	0.699666	0.037488	0.00806887	0.0324579	0.000426087
101	Sedge wetland (X10)	2.00427e-19	0.0159384	7.41255e-05	4.40453e-19	0.00211569	8.69782e-05	0.00079216	0.00390842	0.134523	0.224213	0.977323	0.0390913	0.0019214	0.0408234	8.30554e-11
102	Forested wetland (X5)	9.17183e-08	0.00523126	0.0193656	3.38702e-08	0.0735184	0.0515125	0.00193832	0.0110277	0.161076	0.05658	0.885619	0.0105055	0.00427272	0.0178511	6.63499e-05
103	Sedge wetland (X10)	1.654e-05	0.00274971	0.0167853	9.65835e-14	0.0726322	0.116929	0.00149478	0.000931541	0.112201	0.0491108	0.751467	0.00411219	0.00518506	0.0206361	0.000102781
104	Forested wetland (X5)	6.54589e-05	0.00242317	0.00228442	4.89851e-20	0.104967	0.446562	0.000676273	3.83553e-06	0.0087502	0.00398912	0.0863885	0.00070206	0.0102751	0.0379045	0.00307346
105	Anthropogenic (X0)	0.449269	0.00347192	0.0362917	1.90363e-30	0.0385011	0.0804134	0.00128942	0.000197628	0.0693574	0.0510791	0.0212329	0.00413438	0.00439293	0.00703721	1.99949e-06
106	Anthropogenic (X0)	0.854785	0.005234	0.0589956	1.05928e-59	0.0141139	0.0857239	0.000905289	0.00061019	0.00636052	0.0243809	0.00203826	0.000263787	0.00111236	0.000573967	2.12595e-11
107	Willow wetland (X8)	0.0807259	0.000486307	0.0179466	2.27017e-35	0.0380919	0.0731504	0.000505446	7.57442e-06	0.0153257	0.0164782	0.0689891	0.000866824	0.00481279	0.0121603	3.15644e-07
108	Sparse birch forest (X4)	0.000481288	0.00103747	0.00699461	8.06582e-20	0.085803	0.32075	0.000779019	1.44949e-05	0.0104822	0.00653222	0.457052	0.00108389	0.00945613	0.0360316	0.000726287
109	Moist moss (X11)	1.3882e-06	0.00048607	0.019496	1.29322e-32	0.0247002	0.0138765	0.0115128	0.0376582	0.0363727	0.139336	0.1737	0.371777	0.0128142	0.0392682	4.74602e-07
110	Moist moss (X11)	2.11206e-05	0.000955817	0.0215528	3.0388e-25	0.0352971	0.0260045	0.0084653	0.016247	0.0427804	0.108698	0.185856	0.250719	0.0148399	0.046086	1.40548e-05
111	Moist moss (X11)	1.11563e-05	0.00160443	0.0245639	5.25433e-21	0.0236861	0.0213631	0.00796275	0.0230656	0.0274404	0.13679	0.382511	0.219875	0.0129121	0.0531048	1.04035e-05
112	Moist moss (X11)	9.10627e-09	0.0107249	0.00762688	2.77462e-09	0.0214233	0.0193739	0.00309106	0.0247483	0.0512417	0.106537	0.947059	0.0350262	0.00639711	0.0399705	2.23126e-05
113	Shadow (X3)	0.549329	0.0135933	0.0723783	7.75617e-54	0.00626689	0.142694	0.00218077	0.00337167	0.00209842	0.0341615	0.00605742	0.000796552	0.0010798	0.000824254	4.44768e-11
114	Shadow (X3)	0.000110191	0.00112961	0.00254979	1.60857e-19	0.122773	0.353184	0.000523258	2.70682e-06	0.00558058	0.00176078	0.222695	0.000916357	0.0141422	0.0481335	0.0069599
115	Forested wetland (X5)	0.000146747	0.00861319	0.0109317	1.17471e-13	0.0704148	0.225143	0.000939155	0.000260666	0.0352243	0.0206267	0.534316	0.00107001	0.00525064	0.0176088	0.000373646
116	Water bodies (X1)	2.11491e-12	0.0236484	0.000785181	1.04137e-17	0.00831928	0.00922799	0.00268846	0.00389667	0.192334	0.202056	0.624455	0.0299096	0.00262297	0.0221382	1.5956e-07
117	Sphagnum wetland (X9)	4.73336e-10	0.00934438	0.0022472	8.32327e-28	0.00447126	0.00272792	0.00417834	0.013825	0.128778	0.353672	0.480748	0.106558	0.00352525	0.0211743	5.9309e-09
118	Dwarf shrub subsiding (X14)	1.55191e-13	0.0021231	0.000676909	2.41671e-33	0.00450692	0.00179641	0.00290719	0.00345295	0.221025	0.310436	0.726994	0.0602014	0.00228038	0.0203149	2.05226e-10
119	Sedge wetland (X10)	6.32212e-23	0.0974109	7.23437e-06	5.10579e-16	0.00177254	9.13371e-05	0.00044342	0.000833345	0.147305	0.156428	0.938333	0.0116473	0.00135387	0.0390768	1.20816e-10
120	Dry lichen subsiding (X7)	7.50369e-09	0.00269412	0.0111402	3.31567e-28	0.00966601	0.00419123	0.00733227	0.103484	0.018528	0.186061	0.490433	0.212422	0.00720463	0.0323575	2.76843e-08
121	Sedge wetland (X10)	1.82979e-05	0.00267114	0.00207341	2.16353e-25	0.0516314	0.378735	0.00124286	4.42212e-05	0.014537	0.0110749	0.582207	0.00114654	0.00845575	0.0295326	0.000242981
122	Anthropogenic (X0)	0.385837	0.010179	0.0494034	2.36507e-20	0.0458403	0.108602	0.00156925	0.000974798	0.0600647	0.0364637	0.0926385	0.00641245	0.00520866	0.00823467	5.95592e-05
123	Exposed rock (X2)	0.0177069	0.00233966	0.0444673	4.76493e-14	0.0791579	0.0997172	0.000661728	0.000179938	0.0452272	0.0316027	0.538779	0.00120673	0.00532042	0.0178266	8.01772e-05
124	Exposed rock (X2)	0.00182255	0.000570939	0.0187291	2.09543e-16	0.10918	0.146139	0.000837425	3.19877e-05	0.0296591	0.0154672	0.368529	0.00275676	0.00994049	0.0404815	0.000520813
125	Willow wetland (X8)	0.00343685	0.00434681	0.0364966	4.35828e-13	0.0511684	0.070267	0.0012615	0.00112377	0.0910626	0.062572	0.726291	0.00471311	0.00542902	0.0179727	8.01138e-05
126	Sedge wetland (X10)	2.15536e-11	0.0091313	0.0041427	1.06473e-13	0.00637748	0.00355957	0.00351632	0.0174898	0.0489778	0.230627	0.837457	0.0911682	0.00365273	0.0398305	7.43961e-08
127	Sedge wetland (X10)	6.75283e-19	0.00193468	0.000125519	4.98104e-26	0.0107958	0.000489357	0.00110885	0.00202151	0.112984	0.107443	0.827325	0.0272483	0.00296772	0.043051	4.81391e-10
128	Sphagnum wetland (X9)	2.19773e-08	0.00235452	0.0103254	6.77451e-23	0.0177202	0.0135894	0.00926451	0.0645984	0.0240581	0.1129	0.557108	0.274705	0.0106732	0.0462347	2.07968e-06
129	Sedge wetland (X10)	1.65195e-11	0.00275193	0.00401475	1.32139e-19	0.0172379	0.00577155	0.00343285	0.0153826	0.0779247	0.143486	0.728565	0.0685251	0.00452176	0.033045	1.19139e-07
130	Moist moss (X11)	7.87858e-08	0.000764302	0.00529856	3.72721e-39	0.012503	0.00546479	0.0105684	0.0299397	0.0313199	0.165726	0.140209	0.410963	0.0134929	0.0413566	5.34152e-08
131	Sedge wetland (X10)	3.12622e-06	0.00575077	0.00212014	2.56539e-19	0.0601639	0.291542	0.00101177	7.16603e-05	0.0263187	0.0126497	0.590478	0.00107131	0.00698763	0.0262041	0.000461668
132	Sedge wetland (X10)	1.68174e-05	0.00370955	0.00814783	1.78902e-17	0.0592198	0.194904	0.00125263	0.000530941	0.047426	0.0250057	0.878836	0.00171529	0.00562474	0.0198795	0.000126091
133	Forested wetland (X5)	0.0144932	0.00517108	0.0365615	5.02398e-11	0.0800736	0.124882	0.000662126	0.000253206	0.030138	0.0222592	0.578262	0.00111502	0.00591409	0.0186836	0.000359964
134	Exposed rock (X2)	0.00109645	0.00198757	0.0153828	3.50849e-17	0.0930927	0.191807	0.000966067	0.000166378	0.0378165	0.0161255	0.610861	0.00183929	0.00766066	0.0227692	0.000453851
135	Sparse birch forest (X4)	1.30723e-07	0.00470306	0.018954	9.95186e-08	0.0886121	0.0515935	0.00181117	0.00445274	0.188201	0.0544789	0.609084	0.0121416	0.00441157	0.0189295	9.90768e-05
136	Sparse birch forest (X4)	1.55321e-07	0.00396973	0.0205465	2.21339e-07	0.0643479	0.0409964	0.00192113	0.00558177	0.140634	0.0672945	0.819515	0.0142401	0.00470102	0.0238835	6.11484e-05
137	Willow wetland (X8)	2.53181e-06	0.00112186	0.007009	1.68181e-20	0.0715152	0.167677	0.00189282	0.000309322	0.123741	0.0439289	0.645789	0.00510268	0.00603313	0.0251285	6.05533e-05
138	Sphagnum wetland (X9)	1.33118e-06	0.0721771	0.0141374	1.12427e-08	0.00549446	0.0248808	0.00496869	0.0208053	0.0454613	0.28577	0.545032	0.0573522	0.00329504	0.0226083	3.15316e-06
139	Moist moss (X11)	5.8574e-06	0.000573411	0.0269814	1.8778e-40	0.01079	0.0227366	0.016219	0.0505135	0.0364666	0.259432	0.141552	0.274232	0.00633633	0.0187023	8.70801e-09
140	Moist moss (X11)	2.89732e-10	0.00907107	0.00948523	1.54634e-14	0.0131905	0.00523597	0.00434595	0.101094	0.0302201	0.137608	0.831019	0.100943	0.00518042	0.0320381	3.87924e-07
141	Sphagnum wetland (X9)	1.35589e-10	0.00394709	0.004128	3.06567e-20	0.0153782	0.00424852	0.00447418	0.0328717	0.0449716	0.128238	0.647842	0.152122	0.00744178	0.0431033	4.17713e-07
142	Sedge wetland (X10)	1.56041e-05	0.00257546	0.0360249	5.83412e-12	0.0452977	0.0320589	0.0041867	0.0096369	0.0737775	0.115636	0.417792	0.0782336	0.00866246	0.0389808	6.72358e-05
143	Sedge wetland (X10)	1.82235e-05	0.00458583	0.0651086	2.2386e-08	0.0504681	0.0327064	0.00373222	0.0362595	0.086417	0.109703	0.704605	0.0511528	0.00635583	0.024983	6.27571e-05
144	Sedge wetland (X10)	3.01913e-06	0.000320774	0.00993997	5.35974e-29	0.0240706	0.0143881	0.00714016	0.00459868	0.0381937	0.136723	0.408921	0.256841	0.018099	0.080468	3.42955e-06
145	Exposed rock (X2)	0.0247997	0.00104146	0.195132	8.49348e-10	0.152987	0.069391	0.00152552	0.00072748	0.0173956	0.0146715	0.0255346	0.0193852	0.00850961	0.0234863	0.000377746
146	Willow wetland (X8)	5.19436e-07	0.0050723	0.049938	4.68066e-09	0.0546371	0.0362443	0.00313582	0.030972	0.0908824	0.0784132	0.646495	0.0303542	0.00414243	0.0168027	1.6256e-05
147	Moist moss (X11)	7.20888e-08	0.00713256	0.0190471	2.68157e-16	0.0145972	0.0159411	0.00438067	0.0716795	0.0329231	0.155773	0.903576	0.0446207	0.0048019	0.0248247	7.44888e-07
148	Moist moss (X11)	6.28933e-09	0.00195491	0.00623951	2.88355e-29	0.0120066	0.0059528	0.00737982	0.0343963	0.03765	0.172228	0.358056	0.237304	0.00822427	0.0364228	9.06212e-08
149	Moist moss (X11)	8.06926e-08	0.00146205	0.00480936	2.27559e-33	0.00963172	0.0168794	0.00993704	0.0125369	0.0572118	0.215682	0.351731	0.219767	0.00802964	0.0347472	1.32446e-07
150	Moist moss (X11)	1.79737e-07	0.000379006	0.00519552	6.49221e-38	0.0200988	0.00917558	0.00841803	0.00948924	0.0644186	0.151651	0.199517	0.296365	0.0138507	0.0447114	1.95638e-07
151	Moist moss (X11)	2.27903e-06	0.00171215	0.00629276	6.79886e-42	0.00970511	0.00578514	0.0139916	0.058907	0.0216545	0.190204	0.0478095	0.508475	0.0159563	0.0353704	6.73823e-08
152	Sedge wetland (X10)	9.2023e-08	0.00160702	0.0313166	9.73313e-12	0.0963485	0.0583656	0.00221063	0.00696126	0.234717	0.0663325	0.73533	0.0124285	0.00356051	0.0150683	1.52889e-05
153	Moist moss (X11)	3.07045e-08	0.00256375	0.0213045	1.43134e-18	0.0170883	0.00757231	0.00582607	0.0577994	0.036188	0.167683	0.621638	0.163262	0.00665035	0.03578	4.57614e-07
154	Moist moss (X11)	4.04435e-05	0.00105905	0.0236166	5.46973e-32	0.0187382	0.0103389	0.0117794	0.0484948	0.0186831	0.160293	0.086508	0.431161	0.0170372	0.0464426	9.5475e-07
155	Forested wetland (X5)	4.69884e-05	0.00346155	0.0189618	1.27364e-15	0.0571859	0.497361	0.00168816	0.0004819	0.0246001	0.023539	0.853094	0.000955791	0.00356856	0.0151899	9.21086e-05
156	Sedge wetland (X10)	1.21e-08	0.000606954	0.000634084	1.35425e-39	0.104013	0.364359	0.000860795	6.17805e-06	0.0374748	0.00859124	0.0354325	0.000369864	0.00463154	0.0145008	1.95422e-06
157	Shadow (X3)	4.74091e-07	0.00722635	0.0260894	4.32316e-06	0.0586936	0.0326014	0.00245542	0.0109161	0.152156	0.0825328	0.608861	0.0290941	0.0050187	0.0224995	9.39213e-05
158	Sparse birch forest (X4)	2.76456e-05	0.00118253	0.0479323	5.35009e-09	0.120002	0.15807	0.00264566	0.00159129	0.104457	0.0424015	0.471011	0.0164602	0.00648399	0.0278844	0.000585804
159	Moist moss (X11)	1.66729e-05	0.00419697	0.0439493	4.27067e-11	0.0413225	0.0703239	0.00392745	0.0263252	0.0617914	0.0906685	0.89841	0.027265	0.00602269	0.0243264	6.12717e-05
160	Moist moss (X11)	3.1385e-08	0.00105323	0.00269725	1.60329e-44	0.0101317	0.00322326	0.0103411	0.0437541	0.0181032	0.142199	0.102201	0.43012	0.0170811	0.0423615	2.22355e-08
161	Moist moss (X11)	3.89692e-07	0.00107945	0.00657814	1.06787e-45	0.00932922	0.00353667	0.0124423	0.0790351	0.0173434	0.195945	0.0502981	0.444258	0.0135803	0.0302084	6.66516e-09
162	Moist moss (X11)	2.30357e-10	0.00219429	0.00166875	3.05577e-37	0.0063559	0.00147871	0.00638909	0.0295536	0.0378593	0.19679	0.299105	0.321528	0.00916753	0.0382545	5.85418e-09
163	Sphagnum wetland (X9)	7.15164e-10	0.00628792	0.0028267	2.16986e-31	0.00585332	0.00147659	0.0055716	0.0603036	0.032633	0.227468	0.353285	0.239233	0.00738657	0.0318997	9.96736e-09
164	Moist moss (X11)	4.68414e-06	0.00154382	0.0203963	2.10025e-35	0.0124396	0.00787488	0.0103287	0.0731138	0.0371807	0.239558	0.130152	0.28114	0.0085316	0.0231678	3.68129e-08
165	Moist moss (X11)	8.1965e-07	0.00144463	0.0247635	2.18112e-15	0.0386671	0.0211359	0.00514622	0.0146949	0.0723896	0.121285	0.545845	0.128332	0.00920191	0.044465	1.77924e-05
166	Moist moss (X11)	3.87297e-06	0.000428642	0.00831546	1.16948e-43	0.0152175	0.00599909	0.0125821	0.0295044	0.0194127	0.159645	0.0530296	0.491052	0.0202203	0.0476083	7.40067e-08
167	Sedge wetland (X10)	0.000183984	0.00224336	0.0164974	6.69727e-15	0.0269335	0.0241727	0.00325007	0.00240928	0.0363554	0.143282	0.625928	0.0575716	0.0146867	0.0785821	0.000103704
168	Forested wetland (X5)	0.00279785	0.0107158	0.0142918	4.46886e-13	0.0952244	0.473444	0.000556375	0.000100417	0.0062934	0.0029186	0.668302	0.000289046	0.00556657	0.0129046	0.00252899
169	Forested wetland (X5)	1.23965e-05	0.00356161	0.0346193	2.91329e-09	0.0722358	0.122687	0.00215541	0.00278521	0.0732294	0.0534178	0.65468	0.00808889	0.00492793	0.0218643	0.000143877
170	Forested wetland (X5)	0.000355014	0.001406	0.0395852	1.654e-13	0.0646977	0.123999	0.00219409	0.00121573	0.0647908	0.0622152	0.710964	0.00914056	0.00663033	0.0288135	0.000121846
171	Moist moss (X11)	1.20231e-08	0.000439236	0.0106048	5.468e-45	0.0079064	0.00389968	0.0100256	0.0540515	0.0361596	0.27914	0.177327	0.244192	0.0053576	0.0186812	1.99998e-10
172	Moist moss (X11)	1.65354e-09	0.000261731	0.000691795	9.961e-58	0.00624018	0.00230051	0.011466	0.0109792	0.0133382	0.14538	0.0861063	0.472447	0.0205682	0.0561213	1.02846e-09
173	Moist moss (X11)	5.58748e-13	0.00710036	0.000762369	2.164e-27	0.00479532	0.000553418	0.00301324	0.0215565	0.0593508	0.210787	0.667625	0.172121	0.00563943	0.0396036	3.99016e-09
174	Forested wetland (X5)	0.00015826	0.00386061	0.0211898	3.21694e-14	0.209696	0.562247	0.00072445	7.75599e-05	0.0380744	0.00513205	0.131077	0.000372322	0.00359744	0.00851874	0.000920414
175	Sedge wetland (X10)	8.05968e-07	0.000769254	0.00109778	6.4046e-38	0.103687	0.519715	0.00101291	8.6226e-06	0.0156087	0.00447629	0.0615146	0.000469345	0.00637525	0.0155774	1.77986e-05
176	Sparse birch forest (X4)	0.0031809	0.000880508	0.0925538	6.82729e-08	0.130455	0.228312	0.00207897	0.00044571	0.0533896	0.0335818	0.296603	0.00995535	0.00720938	0.0315821	0.00133274
177	Forested wetland (X5)	4.59797e-05	0.00133236	0.0166761	1.19789e-15	0.0583843	0.0907508	0.00226696	0.00104646	0.0796222	0.0660641	0.778707	0.0124308	0.00853997	0.0382641	0.000146312
178	Moist moss (X11)	2.36402e-07	0.0013079	0.0270406	1.51064e-32	0.0116531	0.00373841	0.00855226	0.110513	0.0267775	0.260015	0.174387	0.267552	0.00683728	0.0247155	7.28409e-09
179	Sphagnum wetland (X9)	1.19134e-08	0.00110063	0.00627897	1.24251e-42	0.0105897	0.00187514	0.00829762	0.0849126	0.0302258	0.198004	0.0872621	0.3397	0.00925511	0.0242165	1.97232e-09
180	Moist moss (X11)	2.91051e-07	0.00302458	0.00504292	1.43853e-37	0.00687894	0.00405397	0.0104954	0.0579868	0.0178588	0.218413	0.134623	0.384789	0.0127479	0.038735	4.04231e-08
181	Sedge wetland (X10)	6.59089e-16	0.00132199	0.000966943	7.81521e-25	0.00871206	0.00065076	0.00164496	0.00863012	0.0708235	0.158644	0.917018	0.0409989	0.00276766	0.0348425	3.1093e-10
182	Sphagnum wetland (X9)	2.03453e-11	0.00262827	0.00691299	3.74722e-14	0.033178	0.0094619	0.00228862	0.0109963	0.141802	0.101378	0.798381	0.0294531	0.00329077	0.0232166	3.92261e-07
183	Sedge wetland (X10)	6.49245e-18	0.00495257	0.000226174	2.91913e-20	0.00864251	0.00120836	0.00121864	0.00240892	0.138741	0.134874	0.891869	0.0174813	0.00194052	0.0308536	1.24624e-09
184	Sphagnum wetland (X9)	7.18857e-07	0.00228593	0.014877	9.49724e-31	0.0106973	0.00559545	0.00871465	0.0604353	0.037723	0.246381	0.21096	0.286745	0.008447	0.0296137	6.45163e-08
185	Shadow (X3)	0.000132008	0.00394263	0.0867241	5.73927e-05	0.0886426	0.100278	0.00276677	0.00639592	0.0584675	0.049036	0.404693	0.0220376	0.00607278	0.0239131	0.000540934
186	Sparse birch forest (X4)	1.10198e-06	0.00132208	0.019393	1.07764e-11	0.0773876	0.0254045	0.00218992	0.00126926	0.105316	0.0883449	0.197427	0.034573	0.00853841	0.0472289	6.54786e-05
187	Moist moss (X11)	1.65903e-07	0.0048751	0.0100609	4.59803e-11	0.0343404	0.035658	0.00295828	0.00446015	0.129523	0.112465	0.737485	0.033165	0.0060216	0.034168	4.39755e-05
188	Moist moss (X11)	4.5279e-11	0.00154847	0.00417723	1.43898e-30	0.0133639	0.00309541	0.00381146	0.0267816	0.0875258	0.181059	0.603157	0.0802003	0.00417797	0.0210698	4.22388e-09
189	Moist moss (X11)	8.91e-08	0.000747339	0.00291453	1.09139e-41	0.0155951	0.00348538	0.00914766	0.0269012	0.028391	0.120501	0.110908	0.464006	0.0216993	0.0522743	1.49686e-07
190	Dry lichen subsiding (X7)	9.55857e-08	0.000785872	0.0116938	6.92822e-43	0.0116632	0.00288394	0.0091892	0.0817546	0.0399502	0.238037	0.0788343	0.309194	0.00780305	0.0198672	1.53906e-09
191	Moist moss (X11)	2.91614e-07	0.00161785	0.0152522	1.95242e-33	0.0147313	0.00438352	0.00901105	0.102186	0.0267083	0.183328	0.144426	0.326449	0.010266	0.029516	5.08932e-08
192	Sedge wetland (X10)	4.55572e-10	0.0029606	0.0109588	1.49521e-13	0.0398803	0.0231787	0.0028467	0.012896	0.128742	0.0964599	0.781245	0.025268	0.00353752	0.0214202	1.68268e-06
193	Sphagnum wetland (X9)	9.53781e-15	0.000811277	0.000473259	1.25733e-24	0.0379888	0.0109919	0.00194501	0.000652398	0.356365	0.0846893	0.642735	0.021486	0.00353603	0.0306734	1.21571e-07
194	Moist moss (X11)	3.05612e-06	0.000884753	0.0165442	2.00936e-28	0.0272794	0.0109322	0.00695866	0.0250985	0.0538741	0.137116	0.306122	0.227363	0.0125788	0.0388712	1.44445e-06
195	Shadow (X3)	9.40635e-06	0.00497533	0.0561356	9.35538e-06	0.0668814	0.0585329	0.00277475	0.00701441	0.071895	0.0670355	0.351107	0.0276302	0.00531157	0.024072	0.000142444
196	Moist moss (X11)	3.94285e-09	0.0078158	0.00724687	1.17589e-07	0.0694186	0.0368123	0.00174531	0.00407076	0.216757	0.061688	0.653992	0.0128921	0.00437828	0.0219264	7.66536e-05
197	Willow wetland (X8)	2.15901e-06	0.00375445	0.0218843	1.24558e-09	0.0582012	0.0614469	0.00272153	0.00401212	0.113842	0.0770914	0.596621	0.023422	0.00600562	0.0282722	0.000126592
198	Moist moss (X11)	8.35198e-10	0.0028695	0.00604673	4.02637e-29	0.00930854	0.00256965	0.0055841	0.0536627	0.0482214	0.21517	0.418859	0.191189	0.00573802	0.026902	1.09497e-08
199	Moist moss (X11)	8.01736e-06	0.000608363	0.0133819	1.05291e-44	0.015441	0.0069968	0.0120178	0.060289	0.0264692	0.184269	0.0563338	0.357534	0.0134629	0.0264562	2.07367e-08
200	Moist moss (X11)	3.67147e-09	0.000837368	0.00402627	2.94316e-44	0.0089058	0.00188793	0.00777188	0.0541058	0.0255718	0.190599	0.157195	0.296903	0.00954163	0.0284944	1.27464e-09
201	Sedge wetland (X10)	1.04019e-08	0.00359129	0.0183384	1.98181e-09	0.0556193	0.0345941	0.00192093	0.0125153	0.161273	0.0741754	0.939025	0.0105362	0.00344554	0.017903	9.51077e-06
202	Sedge wetland (X10)	2.31523e-07	0.00375994	0.0220356	1.49024e-09	0.059586	0.0539159	0.00282412	0.0129285	0.115857	0.0696249	0.863313	0.0212657	0.00533916	0.0240677	6.834e-05
203	Forested wetland (X5)	2.8916e-05	0.00189708	0.0505237	8.1856e-12	0.0597485	0.218909	0.00309524	0.00498737	0.0641351	0.0574045	0.908806	0.00804718	0.00435875	0.019492	7.39488e-05
204	Forested wetland (X5)	0.000216837	0.00263686	0.0061404	1.67789e-20	0.145944	0.382479	0.000605392	1.6891e-05	0.0156465	0.00437806	0.0890519	0.000504637	0.00719351	0.0184418	0.000868505
205	Shadow (X3)	0.0143331	0.000412445	0.0527436	3.02165e-10	0.236484	0.160221	0.000969287	3.22913e-05	0.0406544	0.009982	0.0515573	0.00762699	0.0127367	0.0434871	0.0078348
206	Sphagnum wetland (X9)	6.51562e-09	0.000203599	0.00532278	2.48605e-45	0.0101581	0.00751156	0.0105177	0.013572	0.0593784	0.222696	0.262593	0.267725	0.0069722	0.0271654	1.33249e-09
207	Sphagnum wetland (X9)	2.645e-08	0.00181928	0.0113014	3.39927e-18	0.0445629	0.0157028	0.00412415	0.0180464	0.133798	0.0990539	0.618423	0.0921516	0.00774388	0.0314072	7.81986e-06
208	Sedge wetland (X10)	0.0454573	0.0011412	0.0641942	3.42289e-13	0.192417	0.169513	0.000608706	9.00424e-05	0.0592575	0.0123264	0.214399	0.0013225	0.00639056	0.0157238	0.000705397
209	Forested wetland (X5)	0.00600695	0.0025087	0.0117823	6.95451e-21	0.0545681	0.343704	0.00102887	3.40705e-05	0.0827075	0.0232263	0.430073	0.00125514	0.00429574	0.0131585	0.000112452
210	Sparse birch forest (X4)	0.00318846	0.000684876	0.0883645	1.50409e-08	0.201156	0.181062	0.00163909	0.000139762	0.0500309	0.0208785	0.0262389	0.0120219	0.00847193	0.0328626	0.00208824
211	Sparse birch forest (X4)	4.13206e-05	0.00126458	0.061495	3.39499e-08	0.108704	0.114654	0.00307679	0.0014874	0.0814161	0.0571706	0.15552	0.0294375	0.00694096	0.0334605	0.000403032
212	Dwarf shrub (X13)	3.48617e-08	0.000679692	0.0104574	2.55871e-25	0.0338978	0.0119582	0.005245	0.0128604	0.109401	0.130066	0.493683	0.140896	0.00869362	0.0364574	1.03851e-06
213	Willow wetland (X8)	3.15675e-07	0.00135142	0.010926	1.62952e-20	0.0380816	0.0252028	0.00504852	0.00867796	0.104204	0.111309	0.52196	0.105547	0.00954545	0.0398155	1.31924e-05
214	Forested wetland (X5)	2.45457e-06	0.00355302	0.0128836	6.48512e-10	0.0840335	0.115156	0.00161702	0.000741616	0.116812	0.0474426	0.561345	0.00613457	0.00576872	0.0272086	0.000342635
215	Sparse birch forest (X4)	0.00624286	0.000721027	0.0961942	1.28158e-08	0.203878	0.148732	0.0017676	0.000361878	0.0700966	0.0216052	0.0795156	0.0162439	0.00958876	0.0308252	0.00324763
216	Moist moss (X11)	1.52352e-08	0.00455316	0.00789183	4.50992e-23	0.0191011	0.006732	0.00632879	0.0918801	0.0352748	0.108563	0.548462	0.210688	0.0102266	0.0354642	1.51111e-06
217	Sphagnum wetland (X9)	3.66967e-09	0.000589589	0.0101879	1.51962e-34	0.0155676	0.00695872	0.00599626	0.024922	0.10639	0.213473	0.465094	0.116369	0.00437798	0.018235	4.35936e-09
218	Forested wetland (X5)	0.00175335	0.00143335	0.0523869	8.51306e-10	0.0959445	0.142145	0.00172711	0.000526302	0.0551294	0.0413813	0.446974	0.00813542	0.00767792	0.0325829	0.000675585
219	Forested wetland (X5)	4.73696e-06	0.000672102	0.0133136	3.03355e-20	0.0322363	0.059605	0.00307329	0.0012121	0.0787634	0.141293	0.851832	0.0183254	0.0073491	0.0461747	7.65931e-06
220	Moist moss (X11)	9.27739e-06	0.000261419	0.0254478	9.88818e-32	0.0332623	0.019132	0.00728943	0.00960647	0.0785395	0.168437	0.244113	0.170833	0.0101882	0.0349951	4.62668e-07
221	Anthropogenic (X0)	0.109119	0.0150521	0.0960456	3.78837e-17	0.0150746	0.160368	0.00383755	0.00370416	0.0165072	0.0796835	0.149875	0.0151022	0.00339681	0.00999737	7.16019e-06
222	Anthropogenic (X0)	0.380639	0.0345501	0.0600597	2.56751e-25	0.0113025	0.0907231	0.00247325	0.00302953	0.00748038	0.0539563	0.0361805	0.00737133	0.00341192	0.00614884	9.69967e-07
223	Anthropogenic (X0)	0.0116339	0.00634248	0.121779	1.18799e-16	0.013049	0.21546	0.00802654	0.00771863	0.0175583	0.124462	0.234132	0.0435118	0.00338107	0.0140564	4.73801e-06
224	Forested wetland (X5)	0.000568303	0.0085161	0.0146841	2.06438e-10	0.134861	0.270895	0.000779923	0.000227981	0.0361325	0.00845149	0.398246	0.00115578	0.00673624	0.0166657	0.0047377
225	Moist moss (X11)	0.00536755	0.00235696	0.0641681	1.51683e-19	0.0153567	0.0648237	0.00432822	0.00358128	0.0539031	0.238148	0.555715	0.0275121	0.00464414	0.0225776	1.80203e-06
226	Anthropogenic (X0)	0.443706	0.0206329	0.0374914	2.59447e-19	0.0258635	0.0677903	0.00110968	0.000532476	0.0378417	0.0502655	0.0966556	0.00372649	0.00453597	0.00907307	1.9571e-05
227	Forested wetland (X5)	0.00283456	0.000516439	0.0593746	8.36497e-12	0.20678	0.171645	0.00130639	0.000123425	0.0670076	0.0177818	0.0940983	0.00740419	0.00892548	0.0300445	0.00161605
228	Anthropogenic (X0)	0.173643	0.0081192	0.0261087	8.2273e-27	0.0183705	0.0417773	0.000740556	0.000128298	0.00518244	0.0246309	0.0530722	0.00198546	0.0050454	0.0118907	1.0372e-06
229	Sparse birch forest (X4)	6.53177e-05	0.000317966	0.00203346	8.42882e-30	0.0590713	0.13462	0.00123198	1.18237e-05	0.0467926	0.0265105	0.441739	0.00424464	0.0144931	0.0610119	0.000102444
230	Sparse birch forest (X4)	4.90306e-23	0.405355	5.63554e-08	2.97499e-35	0.0139772	0.00102558	0.000171443	2.83849e-08	0.153796	0.094932	1.13046e-07	0.000618488	0.00313499	0.0600124	6.38002e-09
231	Willow wetland (X8)	2.22043e-20	0.375332	2.61108e-07	7.66046e-31	0.0223907	0.0015945	0.000139547	4.57108e-08	0.1371	0.0539318	2.5984e-07	0.000475387	0.00326482	0.0435469	4.51117e-08
232	Forested wetland (X5)	1.09146e-07	0.00665166	8.5886e-05	8.1581e-35	0.0869699	0.528264	0.000803719	7.4623e-08	0.151995	0.0263326	4.16572e-05	0.000458645	0.00559283	0.0243714	0.000108184
233	Sparse birch forest (X4)	1.82086e-06	0.000950308	0.000823953	5.99732e-31	0.0469781	0.597863	0.00155237	2.39173e-06	0.060055	0.025076	0.124951	0.00101051	0.00548345	0.0296439	4.76964e-05
234	Sparse birch forest (X4)	4.56763e-07	0.000580393	0.00145735	8.92828e-32	0.0470584	0.477822	0.00337912	2.73841e-05	0.138575	0.0605247	0.21626	0.00464396	0.00575015	0.0295988	1.98833e-05
235	Water bodies (X1)	2.00679e-07	0.00710337	0.000860081	3.4901e-21	0.0146554	0.111269	0.00130312	2.43792e-05	0.225876	0.187597	0.525805	0.00201911	0.00345655	0.0298276	5.04181e-06
236	Sparse birch forest (X4)	1.45076e-31	0.0331407	5.04259e-13	2.46264e-106	0.305603	0.971398	0.00171681	1.75028e-17	0.255449	0.0987885	7.99721e-24	3.30602e-05	0.00674189	0.19049	6.33952e-09
237	Sphagnum wetland (X9)	1.31902e-14	0.00645752	0.000127163	1.5617e-25	0.00760185	0.00795288	0.00170121	0.000184326	0.31983	0.235796	0.545364	0.0124235	0.00239365	0.0314942	1.69958e-08
238	Sedge wetland (X10)	1.2406e-11	0.00339684	0.000359168	1.5348e-31	0.00646687	0.00975421	0.00235129	0.000337447	0.267593	0.310419	0.584021	0.017115	0.00304641	0.0279949	9.83992e-09
239	Sedge wetland (X10)	4.39063e-08	0.00655229	0.000362709	1.64523e-25	0.01902	0.116142	0.000968473	7.64274e-06	0.279493	0.146858	0.259522	0.00111863	0.00350948	0.0268814	3.76784e-06
240	Sedge wetland (X10)	5.66954e-06	0.00490758	0.00112586	4.19854e-26	0.0183684	0.381251	0.00201687	3.24326e-05	0.112465	0.0754795	0.656087	0.00191441	0.00434959	0.0233435	2.69955e-05
241	Dwarf shrub (X13)	1.32866e-10	0.000680159	0.000691353	5.38392e-38	0.00938513	0.0125237	0.00374005	0.000523593	0.336781	0.268413	0.592043	0.0433638	0.00400008	0.0260115	8.08357e-09
242	Willow wetland (X8)	4.61145e-14	0.0223026	3.61055e-05	2.59071e-24	0.011616	0.0226391	0.000795904	7.07414e-06	0.359596	0.232714	0.053592	0.00146152	0.00230131	0.03373	1.45804e-07
243	Forested wetland (X5)	5.01687e-05	0.00513181	0.00260899	8.63402e-21	0.0339392	0.456531	0.00137317	1.51242e-05	0.0992518	0.0410839	0.334236	0.00120395	0.00390256	0.0190842	0.000116009
244	Forested wetland (X5)	1.61383e-08	0.00113599	0.00100423	7.63395e-32	0.0125424	0.063968	0.00350508	0.000189371	0.303742	0.242203	0.704968	0.0160937	0.00437766	0.0302288	3.25154e-07
245	Willow wetland (X8)	1.53095e-07	0.00155265	0.000229001	6.97472e-40	0.0113873	0.00643974	0.00100294	1.17952e-05	0.392315	0.36549	0.0927281	0.00690459	0.0074234	0.0439771	5.61455e-08
246	Sparse birch forest (X4)	1.40696e-05	0.000430886	0.000936017	3.39218e-25	0.18385	0.103519	0.000439259	5.31547e-07	0.0397708	0.00784297	0.00759613	0.00178627	0.0201155	0.0800503	0.00175796
247	Willow wetland (X8)	9.39981e-14	0.017364	4.96472e-05	1.28939e-23	0.0120271	0.0121923	0.000663826	1.01474e-05	0.424811	0.244327	0.108346	0.0016813	0.00239184	0.0330674	1.04629e-07
248	Willow wetland (X8)	4.02608e-18	0.0384657	1.27472e-06	2.5789e-32	0.0175951	0.00196327	0.000285738	1.62546e-07	0.509824	0.255977	4.45317e-05	0.00126567	0.00356486	0.0623833	2.05324e-08
249	Forested wetland (X5)	1.76473e-23	0.168713	9.62943e-08	3.88034e-31	0.014925	0.000430913	0.000358251	1.7218e-07	0.286302	0.134313	7.88083e-07	0.00782418	0.00552717	0.114513	2.99174e-08
250	Water bodies (X1)	4.58719e-15	0.0786871	2.7815e-05	2.3837e-17	0.00651536	7.72622e-05	0.000347803	4.82392e-05	0.259411	0.315957	0.0105647	0.024426	0.00623354	0.0847896	4.22245e-08
251	Dwarf shrub (X13)	7.43466e-43	0.207224	2.81275e-16	5.58836e-126	0.164408	0.864814	0.00145329	1.01487e-19	0.0567234	0.0570164	1.45307e-28	4.26709e-05	0.00890604	0.418291	3.97584e-11
252	Sparse birch forest (X4)	6.1143e-11	0.00314727	1.99232e-05	1.34236e-33	0.337005	0.00132963	6.11906e-05	2.99179e-08	0.528259	0.0433386	1.50854e-06	0.000369123	0.0162711	0.0648366	1.0196e-05
253	Sparse birch forest (X4)	2.26297e-25	0.550213	1.78796e-09	1.30022e-46	0.0948465	0.010839	0.000227564	6.71272e-11	0.0188272	0.00322536	9.25993e-14	0.00139797	0.0114902	0.109794	4.11813e-06
254	Willow wetland (X8)	1.81121e-06	0.00680563	0.000993559	3.50001e-23	0.0178	0.214903	0.00155754	1.48396e-05	0.157925	0.138795	0.228561	0.00197013	0.00393179	0.0284373	1.3048e-05
255	Willow wetland (X8)	1.73283e-18	0.0167885	7.19088e-06	4.73132e-27	0.0108432	0.00423828	0.000577365	5.71314e-06	0.495362	0.208488	0.036932	0.00225971	0.00196514	0.0376181	8.41302e-09
256	Sphagnum wetland (X9)	6.86527e-16	0.00133496	0.000153216	9.08479e-35	0.00483817	0.00144627	0.00207675	0.00058581	0.29391	0.266176	0.710126	0.0428345	0.00234071	0.0291112	1.53579e-10
257	Sphagnum wetland (X9)	1.25504e-19	0.00288986	1.72161e-05	3.87146e-30	0.00461472	0.000283068	0.000741652	0.000105209	0.419882	0.225305	0.745475	0.0217697	0.00233709	0.0465246	1.29791e-10
258	Willow wetland (X8)	1.67722e-09	0.00388064	0.00311621	3.81328e-23	0.011752	0.0644202	0.00461265	0.00135573	0.208011	0.233008	0.522678	0.0233079	0.00240042	0.0184937	1.89855e-07
259	Sedge wetland (X10)	2.65363e-13	0.00119632	0.000683208	7.71836e-26	0.00839478	0.016019	0.00312366	0.000483274	0.236515	0.240101	0.835058	0.025758	0.00234871	0.0326933	1.10086e-08
260	Willow wetland (X8)	2.86402e-16	0.000171098	1.79878e-05	4.94322e-51	0.0105366	0.00944769	0.00311957	1.51063e-05	0.448395	0.176098	0.117551	0.0392299	0.00468467	0.047222	7.63483e-10
261	Forested wetland (X5)	1.50565e-25	0.292489	4.09729e-09	7.54789e-50	0.0269607	0.0171284	0.000460652	3.71995e-10	0.0936253	0.0686398	1.65069e-11	0.000669344	0.00405028	0.090505	1.42992e-08
262	Water bodies (X1)	4.08667e-24	0.160002	6.53738e-09	1.75454e-46	0.371956	0.000906295	7.38917e-05	1.18011e-10	0.0845932	0.00759707	4.75847e-14	0.000694615	0.0202157	0.142194	2.19918e-06
263	Forested wetland (X5)	1.95197e-07	0.00069573	0.00152242	5.47199e-30	0.0464989	0.407709	0.00210663	2.42334e-05	0.153242	0.049002	0.441389	0.00211551	0.00425408	0.0224687	9.29499e-06
264	Willow wetland (X8)	3.54723e-12	0.000825522	0.000247676	2.31345e-37	0.00659707	0.01921	0.00333518	9.46999e-05	0.261315	0.313529	0.457551	0.0220352	0.00326395	0.0366507	4.45974e-09
265	Willow wetland (X8)	1.38751e-08	0.00246984	0.000273745	6.58827e-34	0.0275194	0.0110636	0.00112088	1.09924e-05	0.520101	0.266943	0.00647165	0.00927752	0.00656606	0.0365156	4.67136e-07
266	Water bodies (X1)	1.45804e-28	0.434014	9.28967e-10	1.50332e-43	0.0280863	0.000498349	0.000140934	4.00944e-10	0.0851174	0.0220815	4.33358e-11	0.00181574	0.00761118	0.157389	2.5777e-08
267	Dwarf shrub subsiding (X14)	9.35912e-07	0.0408592	0.000483645	1.30905e-18	0.0694358	0.0571276	0.000332971	3.43678e-06	0.322211	0.0527535	0.00248668	0.000531327	0.00429514	0.0162547	0.000102339
268	Water bodies (X1)	9.34595e-20	0.392979	8.5047e-08	1.17082e-40	0.0663565	0.0357734	0.000337175	1.73923e-09	0.0658129	0.0227603	4.41028e-11	0.000512481	0.0051884	0.0476293	1.51527e-06
269	Sphagnum wetland (X9)	2.43482e-13	0.000941494	0.000472368	7.48838e-38	0.00552184	0.00556505	0.00346206	0.00119379	0.244969	0.282322	0.742502	0.0395119	0.00240437	0.0214826	3.17237e-10
270	Willow wetland (X8)	1.0429e-13	0.000920147	0.000236455	2.91021e-39	0.00575048	0.00417221	0.00290749	0.000286047	0.276691	0.324193	0.314138	0.0390123	0.00277898	0.0286316	3.10352e-10
271	Willow wetland (X8)	2.02453e-17	0.00152576	5.01407e-05	1.79191e-37	0.00456864	0.000652182	0.00157413	0.000306063	0.320125	0.249362	0.54155	0.042583	0.00263233	0.0342276	6.97319e-11
272	Moist moss (X11)	4.40124e-15	0.000477199	7.09882e-05	2.06338e-45	0.00753695	0.00232166	0.00230351	0.000131297	0.413703	0.252538	0.26343	0.0425573	0.00359716	0.0315741	1.94277e-10
273	Moist moss (X11)	9.28206e-20	0.000765849	2.68411e-05	9.14978e-41	0.00404897	0.000609624	0.00153596	0.000167819	0.329278	0.233229	0.555999	0.0342482	0.00183518	0.0318799	6.24844e-12
274	Willow wetland (X8)	6.09105e-20	0.000194137	1.06443e-05	1.68948e-50	0.00740539	0.00311382	0.00281719	4.19932e-05	0.383595	0.143025	0.212197	0.0488709	0.002823	0.0378798	2.8792e-11
275	Willow wetland (X8)	9.6879e-16	0.00290259	1.78928e-05	2.94068e-37	0.0157832	0.00569073	0.00126643	3.44615e-06	0.466468	0.27132	0.00110759	0.0113427	0.00377281	0.0491532	7.95068e-09
276	Water bodies (X1)	6.90233e-32	0.500408	2.02912e-10	5.04525e-51	0.0111842	0.00123662	0.000337607	5.29822e-10	0.0964235	0.0763269	3.73785e-11	0.00158271	0.00427834	0.157092	6.72659e-10
277	Water bodies (X1)	8.62191e-20	0.930977	3.01414e-08	3.17913e-46	0.0542045	0.204272	0.000548827	1.34576e-09	0.00124056	0.00194271	9.17648e-14	0.000413227	0.00637591	0.0290353	1.07064e-05
278	Moist moss (X11)	4.4361e-09	0.000597666	0.00203622	2.28419e-40	0.0042451	0.0169312	0.00641193	0.000972352	0.138016	0.437814	0.521613	0.0595847	0.00329349	0.0261349	8.63212e-10
279	Willow wetland (X8)	1.20107e-16	0.000196072	7.156e-05	8.30032e-47	0.00854974	0.00691488	0.00408886	0.000165726	0.35646	0.172614	0.366358	0.0622638	0.0029238	0.029634	1.48052e-10
280	Sparse birch forest (X4)	0.00034031	0.00223527	0.00417057	1.06472e-19	0.0316466	0.3392	0.00200841	1.23588e-05	0.106193	0.0731258	0.177252	0.00484248	0.00595006	0.0360076	0.000199106
281	Sedge wetland (X10)	6.81817e-09	9.6251e-05	0.000406943	9.81257e-49	0.00999891	0.0459751	0.00474588	5.76782e-05	0.26848	0.286866	0.68696	0.0271958	0.00695308	0.0468175	1.29015e-08
282	Moist moss (X11)	0.000599477	7.43497e-05	0.000816596	2.72829e-60	0.00760094	0.0109241	0.00486987	7.41103e-05	0.201652	0.428106	0.190312	0.0789454	0.0185044	0.0556561	8.02273e-09
283	Water bodies (X1)	1.51488e-15	0.0289155	1.00744e-05	5.87168e-28	0.0245591	0.0111819	0.000541301	5.79661e-07	0.406237	0.196476	8.13399e-05	0.00165578	0.00299252	0.0418003	1.47306e-07
284	Willow wetland (X8)	1.59384e-08	0.00114752	0.000393069	2.52319e-30	0.0172129	0.0229714	0.00146506	1.89112e-05	0.488553	0.272158	0.390537	0.00926298	0.0059747	0.0470665	8.1829e-07
285	Sphagnum wetland (X9)	0.00309152	8.39176e-05	0.0324027	1.06433e-36	0.0258732	0.035369	0.004494	0.00043647	0.0646808	0.232719	0.18331	0.048522	0.00926336	0.0406411	1.36917e-07
286	Sparse birch forest (X4)	0.000155063	0.00186507	0.00257962	1.43319e-27	0.0266223	0.312235	0.00158689	2.23712e-05	0.136039	0.0659471	0.605707	0.00190134	0.00478065	0.0212223	2.09735e-05
287	Sparse birch forest (X4)	3.39671e-05	0.00540132	0.000954177	1.21325e-28	0.0230238	0.142028	0.00121833	1.91084e-05	0.209583	0.106385	0.25744	0.00189352	0.00539629	0.0227591	1.46985e-05
288	Sparse birch forest (X4)	6.90336e-11	0.0445562	5.92016e-05	1.04113e-23	0.0357986	0.0233801	0.000415826	8.39064e-07	0.324001	0.143257	0.000152139	0.000858397	0.00375279	0.0305852	3.08827e-06
289	Sphagnum wetland (X9)	9.72696e-05	6.48949e-05	0.0050062	7.27434e-34	0.0536451	0.0451028	0.00338713	5.09466e-05	0.114994	0.110515	0.141842	0.0605641	0.0201822	0.0933942	1.46711e-05
290	Moist moss (X11)	5.35772e-10	0.000219488	0.000541683	4.87049e-43	0.0137255	0.0103274	0.00621844	0.000714169	0.0778271	0.14642	0.3398	0.16946	0.0146301	0.0754934	8.62818e-08
291	Water bodies (X1)	1.32721e-28	0.425386	2.69698e-09	1.27821e-37	0.0127441	0.000173541	0.000174606	7.36262e-09	0.114367	0.0502321	6.81516e-09	0.00371522	0.00597299	0.15736	5.86585e-09
292	Willow wetland (X8)	5.91415e-05	0.000163751	0.00158717	4.67595e-44	0.0224217	0.0603397	0.00314923	5.51163e-05	0.486805	0.253411	0.480183	0.0183996	0.00843974	0.0303481	3.74491e-07
293	Willow wetland (X8)	0.00021615	0.000284069	0.00897151	5.72047e-27	0.075491	0.0127184	0.000869003	4.48469e-05	0.154719	0.136824	0.0682946	0.00740052	0.0113488	0.0515696	3.69385e-06
294	Moist moss (X11)	1.69729e-11	0.000121725	0.00101308	2.6744e-56	0.00797383	0.00786846	0.0115897	0.00618765	0.103495	0.186834	0.210118	0.245421	0.0053424	0.0193743	8.19439e-11
295	Moist moss (X11)	4.56143e-09	0.000179859	0.000570845	3.15339e-58	0.0071153	0.0107469	0.0182998	0.00391136	0.0420244	0.153802	0.0766368	0.536234	0.0174682	0.0476812	5.46495e-09
296	Water bodies (X1)	2.67674e-18	0.010298	1.77421e-06	8.55799e-37	0.0405694	0.0249146	0.000568603	6.33823e-08	0.613511	0.161927	9.31445e-06	0.0009916	0.00263636	0.0414896	5.13593e-08
297	Willow wetland (X8)	1.31219e-06	0.000186565	0.000569684	2.00977e-55	0.00651631	0.0154056	0.00478358	0.000121401	0.24706	0.411239	0.26926	0.046399	0.00874537	0.0355595	2.65105e-09
298	Sphagnum wetland (X9)	1.6295e-05	0.00320701	0.000296667	2.22968e-46	0.00317383	0.00104603	0.0014987	0.000109959	0.152001	0.587512	0.147072	0.029646	0.0134705	0.0606983	6.39364e-09
299	Water bodies (X1)	6.65936e-15	0.158797	1.26932e-05	9.27675e-21	0.0192569	0.000885937	0.000257984	2.78174e-06	0.21365	0.122395	7.58257e-05	0.00328161	0.0047087	0.0463269	3.62628e-07
300	Willow wetland (X8)	4.30863e-08	0.000921198	0.000716804	2.3394e-32	0.0362459	0.440431	0.00241217	9.69353e-06	0.335767	0.089197	0.185634	0.0023329	0.00329388	0.0197143	4.06412e-06
301	Willow wetland (X8)	4.01923e-05	0.000183541	0.00172414	2.80804e-37	0.029178	0.0623285	0.00240463	5.21628e-05	0.139983	0.146007	0.667464	0.012347	0.0141376	0.0659061	4.19482e-06
302	Moist moss (X11)	0.000282472	1.51874e-05	0.00132162	1.77202e-57	0.0153295	0.0117525	0.00373905	2.31203e-05	0.193561	0.341829	0.200932	0.0668392	0.0213786	0.0837793	1.58978e-08
303	Moist moss (X11)	2.5916e-08	0.000128137	0.000192267	8.23491e-64	0.00267415	0.00752857	0.00691975	0.000159612	0.104216	0.418281	0.365539	0.102461	0.0106587	0.0501092	1.6734e-10
304	Dwarf shrub (X13)	1.26173e-06	0.000126651	0.00216124	1.70447e-29	0.0444303	0.0345524	0.00360594	8.314e-05	0.131976	0.129835	0.318624	0.0753254	0.0212173	0.127319	3.22421e-05
305	Sphagnum wetland (X9)	3.48554e-15	0.0139237	1.41212e-05	3.12033e-34	0.00627199	0.000169051	0.000420395	1.18426e-05	0.414447	0.444902	0.00593095	0.0102721	0.0048181	0.0598504	8.4493e-10
306	Water bodies (X1)	4.90426e-28	0.443782	1.5779e-09	9.05227e-39	0.0233227	0.000167955	0.000112566	9.44296e-10	0.0669073	0.0188433	2.47753e-10	0.00330462	0.0095104	0.190431	4.29795e-08
307	Willow wetland (X8)	1.11067e-08	0.000354593	0.000602227	5.35444e-34	0.0274878	0.224346	0.00274192	1.78075e-05	0.207834	0.12414	0.529067	0.00480779	0.00551928	0.0432461	1.88547e-06
308	Willow wetland (X8)	1.21128e-09	0.000948278	0.000328963	6.31326e-32	0.0145066	0.230706	0.00363311	1.98468e-05	0.222645	0.185136	0.499838	0.0071373	0.00449173	0.0456496	1.42541e-06
309	Sphagnum wetland (X9)	1.6017e-05	0.000240095	0.000888622	2.85697e-43	0.017044	0.0128123	0.00320225	0.00016638	0.125215	0.254103	0.460476	0.0471193	0.022807	0.0916738	8.25005e-07
310	Willow wetland (X8)	2.67743e-06	3.56636e-05	0.000318061	7.00117e-68	0.00250779	0.0185745	0.00751136	3.78154e-05	0.107203	0.530049	0.465633	0.062867	0.0110214	0.0592831	1.20309e-10
311	Sphagnum wetland (X9)	2.86292e-06	0.00126052	0.00204005	6.99931e-28	0.00976646	0.0584929	0.00500801	0.000251524	0.0874589	0.270216	0.619436	0.0449944	0.00955567	0.0726038	3.88294e-06
312	Sphagnum wetland (X9)	3.97551e-05	0.000180317	0.00552417	1.49439e-39	0.0136553	0.0496957	0.00667654	0.000361505	0.121799	0.30705	0.339448	0.0679853	0.00902515	0.0462204	1.58396e-07
313	Sphagnum wetland (X9)	1.5216e-06	0.00340934	4.54617e-05	3.77833e-80	0.000162748	0.00145817	0.00987307	0.00117946	0.00266403	0.648261	0.165697	0.117301	0.0166512	0.0557424	9.75715e-13
314	Moist moss (X11)	3.12987e-13	0.000649801	0.00019489	1.49666e-50	0.00341916	0.00332011	0.00646662	0.00153519	0.11208	0.26533	0.289909	0.152767	0.00460564	0.0290728	8.22704e-11
315	Moist moss (X11)	7.10791e-08	9.63698e-05	0.00274016	8.79262e-71	0.00287411	0.0319243	0.0352397	0.0146601	0.0442198	0.348597	0.0901511	0.341433	0.00468021	0.0109569	4.7272e-12
316	Sphagnum wetland (X9)	0.000153033	2.09979e-05	0.000542531	4.1048e-71	0.0046937	0.0113117	0.00555529	3.39717e-05	0.208607	0.508632	0.241836	0.0632142	0.013993	0.0462313	1.73839e-10
317	Sphagnum wetland (X9)	5.20492e-06	0.000494471	0.000284562	1.51988e-69	0.000989843	0.0037304	0.00550198	0.00026594	0.03778	0.647427	0.17778	0.0443947	0.00876766	0.0350313	6.53503e-12
318	Willow wetland (X8)	1.61721e-05	0.000374014	0.00251639	1.16183e-35	0.0230581	0.131965	0.00373911	0.000112269	0.295118	0.187938	0.621746	0.0147417	0.00678175	0.0306605	1.86803e-06
319	Sphagnum wetland (X9)	2.28706e-07	0.000231562	0.000275602	8.56746e-61	0.0033943	0.00645759	0.00872389	0.000537721	0.0286509	0.298369	0.214566	0.199757	0.0212559	0.0782193	2.29637e-09
320	Willow wetland (X8)	3.91725e-06	0.000323626	0.000316639	1.52352e-69	0.000752904	0.0137035	0.0136076	0.000482055	0.0136336	0.545426	0.345849	0.118501	0.0111342	0.0500342	2.97135e-11
321	Sphagnum wetland (X9)	2.43988e-05	6.78674e-05	0.000238818	1.3859e-73	0.0013296	0.00919681	0.00898512	8.04635e-05	0.0422598	0.570375	0.32266	0.104884	0.0160674	0.0669579	4.64852e-11
322	Moist moss (X11)	2.7843e-07	0.000195533	0.000410348	5.28194e-78	0.000708712	0.0277206	0.0364202	0.00333513	0.00712857	0.404359	0.186432	0.308663	0.00946322	0.0291911	4.32472e-12
323	Moist moss (X11)	5.8478e-05	0.000114258	0.000798165	3.22791e-55	0.0084217	0.0130666	0.00568804	0.000139756	0.149233	0.352348	0.233467	0.104663	0.0190337	0.064445	2.85558e-08
324	Sphagnum wetland (X9)	0.000350446	2.64535e-05	0.00140365	1.04957e-68	0.00404053	0.0228234	0.00699933	7.78409e-05	0.159932	0.569841	0.322699	0.0431234	0.00867386	0.0320643	6.99763e-11
325	Sphagnum wetland (X9)	0.00299964	0.0126408	0.000439464	1.33613e-31	0.00835001	0.0012788	0.000784305	3.12659e-05	0.135576	0.354974	0.0297439	0.0263495	0.0257681	0.0957828	6.43118e-06
326	Sphagnum wetland (X9)	3.78948e-11	0.0787462	7.83688e-05	2.20407e-27	0.00371583	0.000229796	0.000740474	9.28514e-05	0.133138	0.547369	0.00298152	0.0249487	0.00711747	0.0676917	1.19798e-08
327	Sphagnum wetland (X9)	2.8016e-17	0.0419159	2.52529e-05	1.5517e-18	0.011345	0.000781893	0.000729819	0.000140928	0.402082	0.157537	0.0686243	0.0201314	0.00358163	0.0438526	9.01571e-08
328	Willow wetland (X8)	3.98834e-07	0.000178158	0.00143922	3.56753e-38	0.0353839	0.227915	0.00352805	3.28373e-05	0.477585	0.141267	0.444282	0.0094976	0.00486996	0.0237435	1.06463e-06
329	Willow wetland (X8)	5.2706e-13	0.00124041	9.47159e-05	5.86906e-32	0.0322703	0.00720786	0.00106863	1.39582e-05	0.723549	0.190612	0.0401095	0.0121515	0.00452195	0.036176	1.39257e-07
330	Moist moss (X11)	5.1304e-08	0.000122274	0.000512777	2.64523e-63	0.00447962	0.00425244	0.0142428	0.0024701	0.0103311	0.192842	0.0696927	0.483569	0.0279504	0.0831565	1.19761e-09
331	Sphagnum wetland (X9)	5.54325e-08	0.00026394	0.00010032	5.38812e-54	0.0053831	0.00332119	0.00159794	8.7944e-06	0.376136	0.543975	0.199823	0.016681	0.0102935	0.0668675	1.57326e-09
332	Moist moss (X11)	2.68416e-08	0.000186766	0.000329458	4.57409e-69	0.00135021	0.0206967	0.0257322	0.00169347	0.013295	0.330144	0.203046	0.339702	0.01166	0.0452523	6.87308e-11
333	Moist moss (X11)	3.53564e-06	0.0004396	0.000760493	1.05905e-50	0.00517226	0.0209356	0.00999698	0.000675018	0.0792246	0.302671	0.280329	0.188185	0.0149703	0.0547808	4.65058e-08
334	Sphagnum wetland (X9)	9.41207e-09	0.0065925	0.00042699	4.92587e-42	0.00144766	0.00301443	0.00652539	0.00238964	0.0297631	0.464212	0.254529	0.164552	0.00850764	0.0542697	2.59504e-09
335	Moist moss (X11)	7.68064e-07	0.00118388	0.000307187	6.14815e-72	0.000519256	0.00700083	0.0147161	0.00250928	0.0084683	0.559309	0.148626	0.129661	0.00838622	0.0290205	3.46465e-12
336	Water bodies (X1)	3.00648e-10	0.000519249	0.00872302	4.04826e-20	0.0343164	0.0294056	0.00354989	0.00111314	0.236515	0.149639	0.357894	0.0414635	0.00296252	0.0250762	2.01057e-07
337	Sphagnum wetland (X9)	2.56431e-07	4.74229e-05	0.00184436	6.93311e-55	0.00713242	0.0228332	0.0104399	0.000507383	0.053491	0.301326	0.313339	0.142668	0.010475	0.0529498	1.51557e-09
338	Moist moss (X11)	1.73967e-08	9.64825e-05	0.00076032	1.35378e-46	0.0240182	0.0136623	0.00784734	0.000608989	0.0874534	0.118685	0.13656	0.275536	0.0243166	0.0876635	4.22899e-07
339	Moist moss (X11)	1.53529e-07	0.0011989	0.000171935	5.0074e-81	0.000208124	0.00766366	0.0232756	0.00498639	0.00252389	0.572173	0.234884	0.154215	0.00787462	0.0270728	1.89433e-13
340	Sphagnum wetland (X9)	0.000396818	0.000570462	0.000408297	2.33824e-47	0.00489318	0.00532084	0.00272135	2.85851e-05	0.158359	0.512	0.178963	0.0581624	0.0215082	0.10348	1.17995e-07
341	Sphagnum wetland (X9)	0.000184746	0.00600084	0.00211227	5.56574e-49	0.00248231	0.00253451	0.0039961	0.00263807	0.0662896	0.626562	0.0446672	0.0531531	0.00713416	0.0215504	5.29984e-10
342	Sphagnum wetland (X9)	5.77545e-27	0.364901	6.02981e-09	3.30613e-38	0.00927524	0.000177587	0.000183739	1.17445e-08	0.166031	0.126795	2.6108e-08	0.00256837	0.00497973	0.144362	1.80779e-09
343	Moist moss (X11)	7.72954e-09	0.000135772	0.00145025	8.35022e-57	0.0085377	0.0165131	0.0173669	0.00576241	0.0696751	0.184358	0.120911	0.378286	0.00989447	0.0276105	1.54565e-09
344	Sphagnum wetland (X9)	1.86439e-07	0.000100297	0.000200967	1.52363e-81	0.000423573	0.0135927	0.022412	0.000733333	0.00372244	0.499678	0.405658	0.168357	0.0113796	0.0525121	7.26433e-13
345	Sphagnum wetland (X9)	0.000859716	0.000134459	0.000988915	2.879e-61	0.00427432	0.0112347	0.00354966	5.08476e-05	0.124425	0.474647	0.201905	0.0273131	0.0104022	0.0362924	6.17343e-10
346	Sphagnum wetland (X9)	0.00152365	3.34013e-05	0.000645472	6.87284e-64	0.0107261	0.00876851	0.00304362	1.61674e-05	0.333108	0.381724	0.122525	0.0487598	0.0187992	0.0503932	5.25377e-09
347	Sedge wetland (X10)	2.27213e-06	0.00340424	0.000163536	5.36157e-34	0.0137017	0.00777448	0.000922402	5.26708e-06	0.344744	0.333413	0.0449172	0.00902418	0.0133308	0.0790581	2.81069e-06
348	Water bodies (X1)	2.07648e-31	0.471521	2.67335e-10	2.42624e-50	0.012364	0.000883615	0.00022839	4.96428e-10	0.130165	0.0759043	8.89803e-11	0.000915414	0.00380353	0.133478	4.51942e-10
349	Sphagnum wetland (X9)	4.95901e-23	0.251629	6.7526e-08	6.33689e-32	0.0151199	0.000506418	0.000379273	7.49138e-08	0.209718	0.145844	7.66943e-08	0.00839532	0.00690254	0.140321	6.51964e-08
350	Sphagnum wetland (X9)	2.12047e-25	0.341669	3.75721e-08	4.96722e-29	0.00994897	0.00016313	0.000261791	1.82815e-07	0.176171	0.102482	8.56495e-07	0.00795582	0.00549067	0.133404	1.55958e-08
351	Sphagnum wetland (X9)	6.48378e-10	0.0319079	0.000135906	3.12057e-27	0.00340434	0.00315122	0.00254273	0.000411483	0.0849978	0.358361	0.185839	0.0611477	0.00985938	0.0795401	4.91641e-07
352	Sparse birch forest (X4)	3.41712e-08	0.000102346	0.0117378	4.27562e-31	0.315268	0.00666453	0.000636789	0.000130762	0.44706	0.0292385	0.00384776	0.00898705	0.00565514	0.012611	3.18766e-07
353	Forested wetland (X5)	1.12631e-06	0.000203621	0.0163174	1.6413e-21	0.211531	0.0511375	0.00185743	0.000184698	0.231923	0.0428333	0.0186324	0.0225009	0.0086385	0.0314279	4.14534e-05
354	Willow wetland (X8)	1.00277e-09	0.00296066	0.000376103	2.12963e-24	0.0317661	0.0672937	0.00173468	3.72029e-05	0.518162	0.13432	0.260208	0.00792703	0.00476563	0.031845	9.90442e-06
355	Moist moss (X11)	5.81952e-09	3.36557e-05	0.000849548	1.78294e-59	0.0114608	0.0382183	0.0198907	0.000885733	0.107808	0.162561	0.125452	0.399237	0.0124486	0.0418457	4.94316e-09
356	Sphagnum wetland (X9)	7.22975e-08	0.000577954	0.000193078	9.8714e-75	0.000308446	0.00933443	0.0161401	0.00123061	0.00585143	0.600827	0.429954	0.100427	0.00701348	0.0360846	6.34065e-13
357	Moist moss (X11)	9.03994e-08	8.39601e-05	0.000602727	2.30261e-75	0.0013812	0.0407548	0.0380537	0.00269954	0.0147202	0.339901	0.180256	0.34768	0.00883253	0.0279084	1.18115e-11
358	Sphagnum wetland (X9)	1.01472e-07	0.000260132	0.00046248	4.30376e-64	0.00151316	0.00892177	0.00998062	0.000941037	0.02896	0.457982	0.441329	0.103029	0.0083667	0.0382262	3.25633e-11
359	Dwarf shrub (X13)	1.81992e-05	0.00142055	0.0011584	3.33014e-43	0.0029276	0.0156673	0.00432929	0.000353666	0.0900343	0.512496	0.663275	0.031208	0.00748128	0.043602	1.14136e-08
360	Sphagnum wetland (X9)	2.02643e-05	0.000580164	0.000397972	4.10541e-73	0.000526935	0.00755386	0.00951218	0.000663952	0.0134035	0.665633	0.291523	0.0521295	0.00780853	0.0306674	2.06314e-12
361	Sphagnum wetland (X9)	0.00507293	0.0082915	0.00334252	7.84357e-36	0.00387788	0.00364838	0.00104837	0.000182528	0.0853253	0.536273	0.18194	0.00565598	0.00549275	0.0251557	8.43747e-09
362	Sphagnum wetland (X9)	1.81012e-06	0.00978875	0.0038553	1.60128e-36	0.00279332	0.00463343	0.00559857	0.00919414	0.0628611	0.539813	0.152468	0.0853906	0.00461968	0.0210024	2.48373e-09
363	Exposed rock (X2)	1.3482e-05	1.01292e-05	0.0498159	3.0604e-39	0.24011	0.0383372	0.0019938	0.000106809	0.358639	0.0687052	0.00662709	0.0176961	0.00548067	0.0148004	6.74356e-08
364	Moist moss (X11)	1.06083e-06	6.11395e-06	0.00183559	5.45728e-70	0.0125927	0.0498197	0.0129913	0.000233357	0.233463	0.297732	0.19426	0.115825	0.00817312	0.0238336	1.35083e-10
365	Sphagnum wetland (X9)	1.28738e-07	0.000699285	0.000726491	3.60159e-48	0.00561285	0.022444	0.0089468	0.00108664	0.103347	0.289929	0.322741	0.125266	0.00945958	0.0377989	2.0414e-08
366	Sphagnum wetland (X9)	5.92099e-09	0.000125692	0.000411587	1.00984e-61	0.00345992	0.00911123	0.0138242	0.00131464	0.0312715	0.253964	0.235661	0.31104	0.0137867	0.0545618	4.37471e-10
367	Sphagnum wetland (X9)	8.18554e-05	0.00438827	0.000736375	7.05478e-74	0.000360605	0.004081	0.0113242	0.0093058	0.00613826	0.694356	0.0868938	0.0605551	0.00610833	0.0145297	4.51649e-13
368	Water bodies (X1)	1.09861e-16	0.0989561	5.86663e-06	1.04505e-21	0.00716529	6.54636e-05	0.000195767	6.26852e-06	0.368874	0.352457	0.00210029	0.00698677	0.00528747	0.0843369	1.21907e-08
369	Forested wetland (X5)	4.83132e-08	0.00521055	0.0012635	7.68905e-28	0.0107275	0.00547132	0.00256451	0.000646546	0.268656	0.335199	0.127577	0.0550294	0.00646211	0.03573	2.62031e-07
370	Sphagnum wetland (X9)	1.67067e-08	0.000463868	0.00291248	5.6342e-41	0.0153507	0.021833	0.00789737	0.0020201	0.309562	0.252398	0.107404	0.138579	0.00489894	0.0185519	1.66646e-08
371	Moist moss (X11)	8.32071e-08	0.000265908	0.0268827	1.96175e-28	0.0231926	0.0886735	0.00917948	0.00263332	0.161774	0.210283	0.217304	0.0839914	0.00276126	0.017256	5.01867e-08
372	Sedge wetland (X10)	7.30923e-05	2.31383e-05	0.0513284	6.31353e-27	0.293135	0.0569145	0.00211134	8.194e-05	0.350247	0.0567394	0.00982647	0.0321066	0.00921761	0.0307909	1.2384e-05
373	Forested wetland (X5)	2.28966e-08	0.000283802	0.00294182	1.18593e-22	0.0968645	0.179222	0.0030439	4.41722e-05	0.336515	0.0758758	0.0888069	0.0186099	0.00665094	0.0432169	5.29885e-05
374	Willow wetland (X8)	1.05836e-05	0.000475607	0.00232332	2.97989e-30	0.0462541	0.401649	0.00286636	1.89268e-05	0.201877	0.0691883	0.265423	0.00568598	0.00612098	0.0296646	3.20528e-05
375	Forested wetland (X5)	0.000338001	0.000900944	0.00284151	1.85152e-31	0.0429898	0.306281	0.00192036	2.23423e-05	0.195672	0.0498183	0.305731	0.00385615	0.00623488	0.0199223	3.42006e-05
376	Dwarf shrub (X13)	1.06365e-09	0.000286511	0.0106373	4.01642e-22	0.0512863	0.0563675	0.00363276	0.000545076	0.272205	0.125614	0.2012	0.0312151	0.00294773	0.0225277	3.11119e-07
377	Sparse birch forest (X4)	2.52416e-06	0.000136813	0.0100722	1.13979e-30	0.077724	0.435228	0.00605127	9.08734e-05	0.394221	0.0954645	0.0788889	0.0220929	0.00410915	0.0184034	6.30608e-06
378	Forested wetland (X5)	3.86747e-05	8.75732e-05	0.0182458	3.3213e-25	0.194743	0.328811	0.00216071	2.6006e-05	0.38738	0.0444957	0.0590383	0.00716805	0.00535802	0.0208466	5.17637e-05
379	Willow wetland (X8)	5.87053e-07	0.000401255	0.00110619	1.37796e-38	0.0246276	0.570543	0.00228288	9.91364e-06	0.142861	0.0591682	0.678579	0.0010496	0.0029843	0.0159951	6.83251e-07
380	Moist moss (X11)	4.95189e-07	4.78264e-05	0.00093559	2.32973e-54	0.0133313	0.00684355	0.00591249	0.000319891	0.0565749	0.221361	0.184882	0.163975	0.0239621	0.0920431	1.55245e-08
381	Sphagnum wetland (X9)	3.77431e-06	0.00699674	0.000413056	1.01824e-32	0.00379175	0.00535661	0.00147879	6.64371e-05	0.153022	0.537881	0.425502	0.012276	0.00859161	0.065992	1.36068e-07
382	Sphagnum wetland (X9)	8.1819e-05	0.000140826	0.000653584	4.17867e-70	0.00159998	0.0130379	0.0085161	0.000252102	0.0429012	0.559884	0.290021	0.0612475	0.00991751	0.0352158	3.15948e-11
383	Dwarf shrub (X13)	8.59718e-09	0.000157802	0.00491417	3.46738e-21	0.144206	0.16808	0.00356957	5.74835e-05	0.375668	0.0771312	0.0328384	0.02988	0.00671821	0.0457142	5.51387e-05
384	Dwarf shrub (X13)	4.46294e-06	0.000160283	0.0109082	4.74066e-20	0.156993	0.259141	0.00248126	2.21457e-05	0.248257	0.0612718	0.0323461	0.0122513	0.00730366	0.0435374	0.000170533
385	Water bodies (X1)	2.39917e-12	0.00347722	1.86774e-05	5.99378e-38	0.0560614	0.121247	0.000924432	1.06084e-07	0.553931	0.15605	3.79773e-05	0.00116601	0.0041113	0.0368649	1.07093e-06
386	Willow wetland (X8)	2.1954e-10	0.00322701	0.000237002	6.51565e-29	0.0188212	0.353625	0.00155378	1.16814e-05	0.177285	0.0835358	0.651109	0.000734903	0.00244898	0.0221698	1.3719e-06
387	Moist moss (X11)	6.01548e-09	9.31395e-05	0.000850774	1.48673e-48	0.0174475	0.00696417	0.00962824	0.00180611	0.037461	0.1068	0.154571	0.433883	0.0282367	0.0980779	1.23992e-07
388	Sphagnum wetland (X9)	5.45444e-06	0.00752381	0.000736531	2.28055e-31	0.00341089	0.0140628	0.00298868	0.000171206	0.0904394	0.517	0.377284	0.0242745	0.00812482	0.0641921	2.64625e-07
389	Forested wetland (X5)	8.19317e-07	0.00186849	0.000487787	3.46321e-29	0.0736265	0.666776	0.00116626	1.31633e-06	0.0110407	0.00542935	0.0274748	0.000748255	0.00885362	0.0386312	0.000615843
390	Forested wetland (X5)	2.91423e-05	0.00700603	0.0022572	3.35222e-20	0.0809017	0.734172	0.00149279	2.93273e-06	0.101487	0.0221107	0.00391553	0.00100767	0.00366173	0.0154844	0.000744249
391	Sedge wetland (X10)	6.02208e-08	3.75321e-05	0.00161476	3.51597e-48	0.0333604	0.0259943	0.00772704	0.000449717	0.190739	0.13458	0.190142	0.181172	0.0156832	0.0546808	1.50859e-07
392	Willow wetland (X8)	7.52973e-07	1.65793e-05	0.00217817	3.04722e-62	0.00950696	0.0482391	0.0115826	0.000332032	0.170651	0.317902	0.358526	0.0972753	0.00717323	0.0272699	3.57143e-10
393	Moist moss (X11)	1.43747e-09	9.59238e-05	0.000163358	3.03764e-69	0.00274514	0.00649726	0.0142753	0.0009049	0.0378883	0.241532	0.199028	0.357531	0.0154666	0.0520206	1.19859e-10
394	Water bodies (X1)	1.76628e-16	0.262262	2.79952e-06	6.19841e-26	0.00635449	0.000645082	0.000243114	7.00714e-07	0.135042	0.319819	3.5263e-05	0.00146294	0.00366369	0.067299	1.27282e-08
395	Willow wetland (X8)	3.87017e-37	0.694409	3.76679e-12	2.6893e-66	0.0127907	0.00484182	0.000377036	1.00633e-11	0.0491725	0.0404392	2.66768e-14	0.000497241	0.0035777	0.162282	9.13846e-11
396	Sphagnum wetland (X9)	1.10125e-11	0.0255793	0.000758828	1.93127e-11	0.0172937	0.00444143	0.00190527	0.000872399	0.244811	0.149088	0.0731476	0.0685998	0.00486393	0.0394556	4.6745e-06
397	Forested wetland (X5)	5.92388e-08	0.00522923	0.000206009	1.32326e-34	0.0330537	0.902043	0.0022421	2.14904e-06	0.0165789	0.00816825	0.0547586	0.00047354	0.00419985	0.0184847	9.84134e-05
398	Forested wetland (X5)	2.48794e-07	0.00432934	0.000364017	3.83116e-29	0.0329384	0.783313	0.00177184	1.06262e-06	0.0666262	0.0313266	0.0250967	0.000612441	0.0035324	0.0228932	5.92548e-05
399	Sedge wetland (X10)	7.51582e-12	0.000518445	0.000628061	2.74205e-32	0.016381	0.0317005	0.00149537	0.000134	0.254289	0.190697	0.923611	0.00267645	0.00248541	0.0259688	9.56262e-09
400	Sedge wetland (X10)	8.4387e-10	0.000721866	0.0011932	5.19688e-34	0.0102451	0.0828106	0.00260039	0.000170131	0.295089	0.272099	0.91315	0.00375376	0.00200731	0.0181171	1.03803e-08
401	Sphagnum wetland (X9)	9.38104e-05	0.000522818	0.000881169	1.17366e-44	0.00770672	0.0170749	0.00260786	6.78212e-05	0.27943	0.424839	0.539889	0.0195148	0.00988628	0.0446601	7.3288e-08
402	Moist moss (X11)	3.10981e-08	7.97611e-05	0.000266948	4.10125e-71	0.00236091	0.0149022	0.0163882	0.000571626	0.0491276	0.335948	0.193478	0.249824	0.0116215	0.0399996	6.4914e-11
403	Forested wetland (X5)	3.46928e-06	0.0102135	0.000850528	2.55001e-25	0.0418421	0.863219	0.00147524	4.10184e-06	0.0240276	0.00958078	0.0823544	0.000338516	0.00336932	0.0138728	0.000308767
404	Water bodies (X1)	7.869e-18	0.267177	2.2602e-06	7.71462e-22	0.00803422	0.000192109	0.00015157	1.58148e-06	0.210147	0.205204	0.000246417	0.00188131	0.00388362	0.0642144	1.91541e-08
405	Forested wetland (X5)	2.40856e-06	0.00227537	0.000732811	1.48981e-26	0.0507616	0.695048	0.00153017	2.21582e-06	0.0419639	0.016279	0.0841713	0.000964383	0.00590085	0.0307566	0.000349752
406	Willow wetland (X8)	4.38804e-10	0.00265393	0.000284981	9.15373e-24	0.0588827	0.125342	0.00110524	1.12614e-05	0.629171	0.0717457	0.196458	0.00264242	0.00391202	0.0232704	2.60695e-05
407	Sedge wetland (X10)	7.51805e-10	0.000596284	0.000300359	2.31864e-35	0.0109371	0.056039	0.00211952	6.26618e-05	0.177962	0.191931	0.955451	0.00487385	0.00546847	0.0498734	1.65578e-07
408	Sedge wetland (X10)	1.69057e-05	0.00100067	0.000506387	1.49453e-33	0.0146906	0.0779101	0.00217308	1.11489e-05	0.268916	0.228826	0.441316	0.0103214	0.0105535	0.0647327	1.00289e-05
409	Forested wetland (X5)	5.29598e-08	0.00103384	0.000437443	1.29438e-35	0.0430332	0.691611	0.00262891	3.1829e-06	0.207926	0.0497535	0.0440739	0.00151958	0.00355415	0.0189817	9.59766e-06
410	Sedge wetland (X10)	1.45708e-06	0.00854892	0.000536079	7.22697e-28	0.0320706	0.62358	0.00206987	2.68078e-05	0.0444475	0.0210731	0.345043	0.00127514	0.00596654	0.0223111	0.000276313
411	Willow wetland (X8)	4.79147e-09	0.00552248	0.000278431	7.75805e-28	0.0157681	0.363854	0.00217521	3.14322e-05	0.114915	0.0764483	0.749738	0.00164389	0.00395198	0.0285058	1.0133e-05
412	Forested wetland (X5)	5.9706e-07	0.0129738	0.000542844	1.7606e-26	0.0364396	0.748047	0.00140401	1.30395e-05	0.0204322	0.00893325	0.264977	0.00041865	0.00423895	0.0155995	0.000238595
413	Forested wetland (X5)	1.85601e-09	0.00285269	0.000416377	2.20905e-25	0.0563153	0.382923	0.00166963	1.6639e-05	0.416493	0.0437285	0.264214	0.00191801	0.00340114	0.0176171	4.35931e-05
414	Sedge wetland (X10)	5.44618e-12	0.000643469	4.04662e-05	4.85998e-44	0.00920187	0.378888	0.00262649	2.90169e-06	0.149321	0.131463	0.695506	0.00118817	0.00329491	0.0391393	6.86312e-08
415	Sedge wetland (X10)	2.33628e-05	0.000171491	0.0027592	8.70284e-42	0.0161458	0.11781	0.00246457	9.33626e-05	0.149035	0.177746	0.934814	0.00375734	0.00546356	0.026461	9.06314e-08
416	Water bodies (X1)	4.98248e-35	0.644429	1.7881e-11	2.07083e-59	0.0109769	0.001987	0.000306749	4.69806e-11	0.0625321	0.0550368	6.65463e-13	0.000724227	0.00388494	0.167874	1.66798e-10
417	Forested wetland (X5)	2.5448e-06	0.00119059	0.000872783	1.49644e-31	0.0713216	0.681176	0.00139145	2.85839e-06	0.0288872	0.00856557	0.066607	0.000818312	0.00639264	0.0241232	0.000156295
418	Forested wetland (X5)	2.04169e-12	0.00391226	8.78435e-06	4.56925e-44	0.0204222	0.886013	0.00319881	9.4974e-08	0.0709727	0.0465867	0.001035	0.00058114	0.00359827	0.0374687	4.53538e-06
419	Forested wetland (X5)	6.47974e-14	0.00165064	0.000142519	1.07597e-21	0.058082	0.0760764	0.00126864	1.11443e-05	0.746284	0.089704	0.157017	0.00446593	0.0026337	0.0269045	3.60308e-06
420	Forested wetland (X5)	3.05624e-06	0.00130808	0.00047372	7.42623e-44	0.0239934	0.804194	0.00295013	1.11241e-05	0.0322782	0.018235	0.382573	0.000858548	0.00470721	0.0146014	5.9393e-06
421	Sedge wetland (X10)	9.52085e-21	0.00076	3.10326e-05	1.72944e-40	0.00267967	0.000273261	0.0014638	0.000877686	0.123823	0.172645	0.934413	0.0381811	0.00195796	0.0359343	1.53056e-12
422	Sedge wetland (X10)	3.12722e-07	0.00041227	0.00258495	1.79689e-37	0.0080874	0.0701365	0.00369209	0.000229887	0.163108	0.324293	0.879221	0.00930182	0.00347553	0.0261082	1.50684e-08
423	Water bodies (X1)	5.58559e-27	0.435918	5.48514e-09	5.02369e-39	0.014384	0.00045884	0.000177342	7.19285e-09	0.12456	0.0585524	6.85661e-09	0.00151681	0.00452163	0.105583	5.09898e-09
424	Forested wetland (X5)	5.52463e-06	0.00555082	0.000890494	4.6093e-25	0.0489966	0.557058	0.00128694	1.51641e-05	0.02208	0.00847059	0.337558	0.000983189	0.00726487	0.0248811	0.000745945
425	Forested wetland (X5)	4.29108e-08	0.000916828	0.00146092	1.33353e-22	0.0659801	0.493196	0.00254649	1.20065e-05	0.390498	0.0645168	0.147974	0.0042446	0.00375856	0.0251078	7.83805e-05
426	Forested wetland (X5)	5.18211e-08	0.00302484	0.000550258	9.24044e-24	0.0357036	0.267815	0.00255973	2.51884e-05	0.314654	0.0836635	0.23915	0.00731113	0.00600981	0.0357254	0.000132682
427	Sedge wetland (X10)	0.000168546	6.26018e-06	0.00194422	7.60813e-55	0.0446026	0.0837931	0.00244145	5.41806e-06	0.296537	0.131386	0.407828	0.010828	0.01262	0.0464594	8.42828e-08
428	Sparse birch forest (X4)	0.00766563	0.000762761	0.0757367	1.68625e-22	0.0182268	0.433284	0.00410465	0.000128971	0.0480313	0.146202	0.226084	0.00609629	0.00208201	0.0137871	6.86171e-07
429	Sphagnum wetland (X9)	1.96207e-07	0.0530967	0.000769012	1.74708e-18	0.00508518	0.00548931	0.0010457	5.17924e-05	0.0747452	0.461024	0.0175222	0.00761784	0.00470117	0.0523038	3.53062e-07
430	Forested wetland (X5)	3.22924e-08	0.00388436	0.000337296	2.16619e-28	0.0445217	0.768899	0.00277248	4.35663e-06	0.139815	0.0362238	0.0359892	0.00163833	0.00416214	0.0235013	0.00015605
431	Forested wetland (X5)	5.95245e-07	0.00573402	0.00139267	3.16556e-22	0.0465671	0.564178	0.00207698	2.55932e-05	0.18702	0.0465256	0.147861	0.00169962	0.00343703	0.0164993	0.000120497
432	Sedge wetland (X10)	9.27979e-07	0.000215989	0.00157071	1.51565e-45	0.00736788	0.0300517	0.00680524	0.000389132	0.102799	0.321145	0.551011	0.0691357	0.00898467	0.0484951	2.22774e-08
433	Forested wetland (X5)	0.024062	0.000199187	0.179253	2.56901e-30	0.0877749	0.282021	0.00439089	0.000652462	0.0294744	0.0267604	0.0135981	0.0196918	0.00411868	0.00872322	1.44395e-06
434	Willow wetland (X8)	1.72894e-05	2.83162e-05	0.000754505	8.28874e-63	0.00765854	0.0132353	0.00467638	6.96711e-05	0.262483	0.435884	0.50637	0.0474299	0.0121572	0.0452071	9.10593e-10
435	Forested wetland (X5)	5.345e-06	0.00129611	0.00147341	2.28796e-29	0.0363458	0.367445	0.00274548	4.57537e-05	0.229818	0.0684711	0.528216	0.00491463	0.00591678	0.0247775	4.79243e-05
436	Forested wetland (X5)	6.56898e-09	0.00273289	0.000396348	7.59769e-26	0.0372857	0.395654	0.00191856	2.04175e-05	0.219823	0.0416317	0.568705	0.00226238	0.00449145	0.0256409	6.02089e-05
437	Forested wetland (X5)	4.06641e-05	0.0016686	0.00124304	4.33976e-28	0.0925661	0.481018	0.000991786	5.64557e-06	0.0220206	0.00449741	0.115946	0.00123179	0.0104194	0.0275411	0.00125408
438	Sedge wetland (X10)	3.10713e-09	0.00239533	0.000124162	1.66007e-35	0.00960945	0.230632	0.00227539	4.97733e-06	0.18815	0.210725	0.334922	0.00216548	0.00415282	0.0418194	7.03444e-07
439	Sedge wetland (X10)	2.10889e-05	0.000127631	0.00174393	5.11455e-81	0.000688909	0.0563336	0.0300077	0.00340422	0.00916947	0.532175	0.253883	0.0884938	0.00432236	0.0121109	2.42976e-13
440	Sedge wetland (X10)	7.73823e-06	6.81602e-05	0.00127425	2.48742e-68	0.00419095	0.0297083	0.0130475	0.000591694	0.104163	0.408182	0.153331	0.111175	0.0077908	0.0216439	9.04144e-11
441	Sedge wetland (X10)	1.51352e-06	7.78507e-05	0.00559836	1.99237e-48	0.0133569	0.0872035	0.0100134	0.000650129	0.275154	0.318877	0.34933	0.0640699	0.00429244	0.0179398	4.43827e-09
442	Forested wetland (X5)	3.37738e-05	0.000462586	0.00421644	4.95818e-28	0.0735037	0.287482	0.002985	6.81305e-05	0.464043	0.0685752	0.325932	0.0118741	0.00649519	0.021475	8.92965e-05
443	Forested wetland (X5)	3.97726e-05	0.000717136	0.00279329	1.29787e-30	0.0482873	0.29585	0.00296449	5.89865e-05	0.325861	0.0777706	0.346765	0.00841131	0.00646634	0.0223832	4.0407e-05
444	Forested wetland (X5)	5.55662e-06	0.00158054	0.00137331	8.18605e-28	0.0369297	0.340353	0.00271393	4.50436e-05	0.225691	0.0679776	0.483645	0.00581344	0.00657	0.0280533	9.01727e-05
445	Forested wetland (X5)	1.36454e-06	0.00215307	0.000990377	2.82899e-28	0.0490776	0.455964	0.00254994	3.32669e-05	0.25837	0.0457383	0.286455	0.00395713	0.00562781	0.0210245	0.000136121
446	Sphagnum wetland (X9)	0.000175537	3.61073e-06	0.00250131	1.09243e-57	0.0432996	0.015468	0.00221655	1.11723e-05	0.263043	0.214294	0.220144	0.0238868	0.0182281	0.0660326	1.33514e-08
447	Sphagnum wetland (X9)	1.0089e-07	0.000231882	0.000114436	1.27833e-81	0.000387957	0.00558104	0.0120871	0.000459794	0.0109994	0.608548	0.333959	0.0850742	0.00854616	0.0367269	2.37298e-13
448	Sparse birch forest (X4)	0.000552334	0.000173941	0.0720671	1.11882e-20	0.223019	0.0686501	0.00127603	0.000134252	0.117666	0.0300843	0.0158633	0.00939864	0.00678631	0.0202517	2.38753e-05
449	Sparse birch forest (X4)	6.10262e-06	0.000118336	0.009396	1.62209e-29	0.204747	0.0297315	0.00144909	0.000245651	0.516146	0.0741613	0.127123	0.0136762	0.0101597	0.0265448	1.30138e-05
450	Forested wetland (X5)	7.29511e-10	0.00143145	6.8537e-05	2.39792e-42	0.0210406	0.868054	0.00388371	1.14935e-06	0.0400497	0.0324639	0.0463395	0.00102506	0.00445433	0.0324145	6.66066e-06
451	Forested wetland (X5)	7.51823e-05	0.000492975	0.00107983	1.20521e-38	0.0678761	0.570575	0.00194035	5.15785e-06	0.0786649	0.0129813	0.0945482	0.00242698	0.00858041	0.0213625	9.04353e-05
452	Forested wetland (X5)	3.24646e-07	0.000693739	0.00146471	9.30374e-27	0.0616151	0.461447	0.00263877	2.25148e-05	0.223197	0.0402665	0.349793	0.0048827	0.00567926	0.0279721	0.000104358
453	Sphagnum wetland (X9)	7.06024e-06	1.67214e-05	0.000734912	2.0665e-61	0.0100032	0.0139417	0.00416664	4.00743e-05	0.249199	0.405645	0.518308	0.0415479	0.0134319	0.0584449	1.46724e-09
454	Moist moss (X11)	7.96022e-08	0.000115307	0.000386345	2.72138e-76	0.00107534	0.0160781	0.0192136	0.00128617	0.0219061	0.45136	0.261819	0.160457	0.00742335	0.0259889	2.21336e-12
455	Sedge wetland (X10)	7.65507e-06	0.000188459	0.0693614	4.80199e-38	0.024281	0.0537409	0.0102752	0.0193712	0.163618	0.254315	0.241981	0.0822498	0.00280396	0.00856002	4.00142e-09
456	Sphagnum wetland (X9)	3.91358e-10	0.0286915	0.000647164	4.18778e-18	0.00716092	0.00467173	0.00175115	0.000217611	0.130751	0.360739	0.0269182	0.0274115	0.00428956	0.0466655	2.70853e-07
457	Forested wetland (X5)	9.39975e-06	0.000427295	0.00152861	3.73511e-35	0.0295909	0.248794	0.0031661	4.72942e-05	0.298723	0.103166	0.676545	0.00832299	0.00672081	0.0280052	8.28964e-06
458	Forested wetland (X5)	8.27596e-06	0.000679025	0.000954592	6.48446e-33	0.0577717	0.597178	0.0024482	7.01365e-06	0.0795245	0.0199897	0.15863	0.00336782	0.00849608	0.0316777	0.000212984
459	Forested wetland (X5)	1.52482e-07	0.000375459	0.000625685	1.46097e-40	0.0243655	0.433972	0.0034093	1.66405e-05	0.206521	0.102115	0.473441	0.00320402	0.00457495	0.024849	1.03267e-06
460	Water bodies (X1)	2.69196e-11	0.127615	5.95898e-05	1.15148e-23	0.00367938	0.000275003	0.000796367	7.78615e-05	0.108644	0.525914	0.00215168	0.0310787	0.00850919	0.0889667	6.32549e-08
461	Sedge wetland (X10)	1.8643e-05	0.000445016	0.00303948	1.98954e-28	0.0710198	0.339754	0.00251305	3.80482e-05	0.235318	0.0417682	0.386713	0.00716126	0.00754888	0.0274632	0.000123279
462	Forested wetland (X5)	1.31652e-07	0.000841415	0.000761464	1.13468e-30	0.0703342	0.653103	0.0025013	4.67719e-06	0.265044	0.0315004	0.0514898	0.00274681	0.00438363	0.0201722	7.34197e-05
463	Forested wetland (X5)	3.97066e-09	0.000115174	0.00168964	9.05737e-36	0.0451639	0.0977625	0.00370103	5.21049e-05	0.698475	0.198163	0.206693	0.0213892	0.00373618	0.0225451	2.2348e-07
464	Sedge wetland (X10)	0.000181892	1.35451e-05	0.000896112	1.51582e-62	0.0124971	0.0255528	0.0043096	2.33425e-05	0.433355	0.439354	0.500193	0.0353528	0.013489	0.048626	4.16163e-09
465	Sparse birch forest (X4)	2.05129e-06	0.000837654	0.0102922	1.85389e-17	0.109641	0.288688	0.0029101	0.00017125	0.273771	0.0515233	0.153156	0.0118373	0.00519962	0.0231794	0.000216258
466	Forested wetland (X5)	4.2998e-07	0.00101108	0.000994546	6.44356e-30	0.0613053	0.589363	0.00262863	1.46127e-05	0.159447	0.0314138	0.172958	0.00300513	0.0056025	0.0241	0.000103122
467	Sparse birch forest (X4)	1.39126e-06	0.00026918	0.00739728	1.75323e-18	0.190562	0.100564	0.00178095	7.03758e-05	0.232624	0.041564	0.076485	0.0152212	0.0111937	0.0508981	0.000490126
468	Sparse birch forest (X4)	0.000281139	3.46439e-05	0.011191	3.34468e-24	0.221613	0.0768977	0.00153826	6.4499e-06	0.147662	0.0330377	0.0189098	0.026885	0.0214156	0.0956791	0.000590727
469	Sphagnum wetland (X9)	9.70277e-12	0.000560074	0.000801191	3.05418e-51	0.00366549	0.000991206	0.00460016	0.00391169	0.181728	0.417341	0.172267	0.134644	0.00327642	0.0165867	5.64863e-12
470	Forested wetland (X5)	8.7827e-06	0.00318548	0.00208989	1.80383e-22	0.0615428	0.639176	0.00169257	1.03548e-05	0.0635932	0.0226423	0.0938594	0.0012472	0.00484296	0.0222114	0.000347482
471	Forested wetland (X5)	5.94054e-10	0.00145299	0.000257714	2.07034e-32	0.0504191	0.601924	0.0029166	2.85683e-06	0.352609	0.0792437	0.00877611	0.00241165	0.00314812	0.0223559	8.8294e-06
472	Sparse birch forest (X4)	1.81062e-07	0.000138854	0.00720806	1.39722e-22	0.161226	0.118528	0.0028877	0.000117318	0.246058	0.0554792	0.0862483	0.0257908	0.00981463	0.0491257	9.47415e-05
473	Sparse birch forest (X4)	7.47028e-05	1.56069e-05	0.0222189	3.47969e-29	0.274117	0.117878	0.00266587	1.86412e-05	0.253163	0.0463634	0.00688309	0.0381225	0.0138307	0.0544523	6.11131e-05

## Sheet: Mixedpixel_NN_10neurons_classif
	Predicted															No	Ground class (reference)	Reference																			Reference data	Anthropogenic	Water bodies	Exposed rock	Shadows	Sparse birch forest	Forested wetland	Dry lichen	Dry lichen subsiding	Willow wetland	Sphagnum wetland	Sedge / Eriophorum	Moist moss
	1	2	3	4	5	6	7	8	9	10	11	12	13	14	15			X0	X1	X2	X3	X4	X5	X6	X7	X8	X9	X10	X11	X12	X13	X14			Number of randomly selected points	Classified data	CLASS	X0	X1	X2	X3	X4	X5	X6	X7	X8	X9	X10	X11
153325	0.00160813	0.0103515	0.00240323	1.79018e-17	0.166297	0.31086	0.000468289	2.04463e-05	0.00461437	0.000759842	0.116803	0.000999427	0.0193198	0.0278557	0.110126	153325	Sparse birch forest (X4)	0	0.0038	0	0	0.4811	0	0	0	0.1061	0	0	0	0	0.0227	0.3864			50	Anthropogenic	X0	35.8695	32.179	10.8482	9.0895	37.1908	37.1908	1.8706	9.0427	37.1908	37.1908	33.0086	37.1908
153326	0.00530545	0.000415845	0.00620976	8.72086e-12	0.398879	0.10035	0.000233142	6.70334e-07	0.0243431	0.00114926	0.0183774	0.00231715	0.0285618	0.0722818	0.216232	153326	Sparse birch forest (X4)	0.003	0	0	0	0.6973	0	0.0059	0.0059	0	0	0	0	0.0148	0	0.273			50	Water bodies	X1	27.8953	27.8953	10.8482	9.0895	27.8953	27.8953	1.8706	9.0427	27.8953	27.8953	27.8953	27.8953
154154	0.0159602	0.00101988	0.00545682	1.23357e-12	0.433842	0.0731115	0.000251205	1.93859e-06	0.0478299	0.00125385	0.00912095	0.00346118	0.0318708	0.0525786	0.374422	154154	Sparse birch forest (X4)	0	0	0	0	0.675	0	0	0.0162	0.1319	0.005	0.0006	0.0025	0.015	0.0269	0.1269			4	Exposed rock	X2	12.2923	12.2923	10.8482	9.0895	12.2923	12.2923	1.8706	9.0427	12.2923	12.2923	12.2923	12.2923
154155	0.065367	0.00115714	0.0241173	1.05798e-08	0.407414	0.14163	0.000359414	6.33328e-06	0.0460192	0.00271968	0.0102852	0.00243835	0.0170399	0.0348609	0.129602	154155	Sparse birch forest (X4)	0	0	0	0	0.4188	0	0.0034	0.0852	0.2114	0.0154	0.0027	0.004	0.1268	0.0906	0.0416			7	Shadows	X3	1.12632	1.12632	1.12632	1.12632	1.12632	1.12632	1.12632	1.12632	1.12632	1.12632	1.12632	1.12632
154980	0.00530806	0.000881457	0.00448551	4.9191e-15	0.40424	0.0746149	0.00024534	2.38903e-06	0.0281621	0.00101287	0.0177709	0.00258375	0.0318194	0.0527562	0.209538	154980	Dwarf shrub subsiding (X14)	0.0006	0.0006	0	0	0.3912	0	0	0.0138	0.0344	0.0062	0	0.0006	0.0112	0.0412	0.5			50	Sparse birch forest	X4	35.8695	32.179	10.8482	9.0895	46.0093	41.0067	1.8706	9.0427	43.5635	49.1713	33.0086	46.3513
154981	0.00966862	0.0021864	0.00552587	4.30112e-13	0.323764	0.152414	0.00029061	4.24353e-06	0.0182351	0.00106615	0.0318938	0.00152846	0.0229482	0.0393426	0.209045	154981	Dwarf shrub subsiding (X14)	0	0.0006	0	0	0.3187	0	0	0.0025	0.1412	0	0	0.0056	0	0.0131	0.5181			50	Forested wetland	X5	35.8695	32.179	10.8482	9.0895	46.0093	41.0067	1.8706	9.0427	43.5635	48.7763	33.0086	46.3513
154985	0.0245042	0.00189073	0.0244551	7.98214e-07	0.468999	0.131484	0.000525767	3.31441e-05	0.0566528	0.0023888	0.0108588	0.00585157	0.0214554	0.0344382	0.397452	154985	Dwarf shrub subsiding (X14)	0.0088	0	0	0	0.3081	0	0.0006	0.005	0.0069	0.0038	0.0006	0.0012	0.0462	0.0069	0.6119			0	Dry lichen	X6	1.56321	1.56321	1.56321	1.56321	1.56321	1.56321	1.56321	1.56321	1.56321	1.56321	1.56321	1.56321
155807	0.00413054	0.00134236	0.00449904	1.0754e-14	0.344192	0.104031	0.000334816	4.96548e-06	0.0247289	0.00115446	0.0290554	0.00309927	0.029251	0.0486855	0.220345	155807	Dwarf shrub subsiding (X14)	0.0006	0.0012	0	0	0.3075	0	0	0.0038	0.0012	0	0	0	0.0081	0.0056	0.6719			1	Dry lichen subsiding	X7	5.11564	5.11564	5.11564	5.11564	5.11564	5.11564	1.8706	5.11564	5.11564	5.11564	5.11564	5.11564
155808	0.0128251	0.00253435	0.00572838	2.99863e-14	0.308375	0.112461	0.000337153	9.87942e-06	0.0276376	0.00147438	0.0395575	0.0022811	0.024034	0.0359386	0.165137	155808	Sparse birch forest (X4)	0	0.0012	0	0	0.4612	0	0	0.01	0.085	0.0081	0	0.0006	0.005	0.0319	0.3969			50	Willow wetland	X8	35.8695	32.179	10.8482	9.0895	41.5599	41.0067	1.8706	9.0427	41.5599	41.5599	33.0086	41.5599
155813	0.0192159	0.00172866	0.0205683	4.23158e-08	0.473464	0.099586	0.000527141	3.36992e-05	0.069798	0.00278415	0.008338	0.00719873	0.0236971	0.0368512	0.353302	155813	Sparse birch forest (X4)	0.0006	0	0	0	0.5506	0	0	0.0162	0.0025	0.0025	0	0.0006	0.0344	0.0019	0.3906			50	Sphagnum wetland	X9	35.8695	32.179	10.8482	9.0895	41.2022	41.0067	1.8706	9.0427	41.2022	41.2022	33.0086	41.2022
155814	0.0766445	0.00240969	0.0432547	1.6097e-08	0.522068	0.166406	0.000521101	6.42054e-05	0.0431258	0.00150814	0.00529983	0.00437982	0.0170905	0.019381	0.26451	155814	Sparse birch forest (X4)	0	0	0	0	0.3783	0	0	0.0757	0.2061	0.0594	0.0012	0.0035	0.0221	0.1141	0.1397			50	Sedge / Eriophorum	X10	35.8695	32.179	10.8482	9.0895	37.6768	37.6768	1.8706	9.0427	37.6768	37.6768	33.0086	37.6768
156633	0.000936376	0.000477164	0.00249581	3.8963e-20	0.34117	0.0588919	0.000310269	2.27104e-06	0.0284538	0.00120758	0.025836	0.00424573	0.0372132	0.0654566	0.0807556	156633	Dwarf shrub subsiding (X14)	0.0125	0.0044	0	0	0.3373	0	0	0.0213	0	0	0.0013	0.0006	0.0539	0.0163	0.5524			50	Moist moss	X11	30.0435	30.0435	10.8482	9.0895	30.0435	30.0435	1.8706	9.0427	30.0435	30.0435	30.0435	30.0435
156634	0.00645286	0.00105104	0.00583724	5.7145e-15	0.346258	0.0990846	0.000352661	6.8322e-06	0.0232665	0.00113859	0.0429159	0.00350221	0.0297419	0.0480983	0.188892	156634	Dwarf shrub subsiding (X14)	0.0075	0.0006	0	0	0.2844	0	0	0.0069	0	0.0006	0	0	0.01	0.0012	0.6888			0	Moist moss subsiding	X12	5.29305	5.29305	5.29305	5.29305	5.29305	5.29305	1.8706	5.29305	5.29305	5.29305	5.29305	5.29305
156635	0.00365037	0.000861574	0.00335987	1.49102e-14	0.390392	0.0653119	0.000258566	1.84289e-06	0.0306195	0.00106904	0.0162898	0.0036776	0.0373191	0.0660331	0.315185	156635	Dwarf shrub subsiding (X14)	0.0019	0.0006	0	0	0.2856	0	0	0.0544	0.0294	0.0194	0	0.0031	0.0181	0.0481	0.5394			3	Dwarf shrub	X13	13.7463	13.7463	10.8482	9.0895	13.7463	13.7463	1.8706	9.0427	13.7463	13.7463	13.7463	13.7463
156638	0.0434015	0.00132236	0.03415	3.06793e-07	0.450222	0.225795	0.0006289	2.6034e-05	0.0600083	0.00273909	0.0136696	0.00488787	0.0168666	0.0300977	0.289983	156638	Dwarf shrub subsiding (X14)	0.0012	0.0025	0	0	0.2794	0	0.0006	0.0062	0	0	0.0006	0.0019	0.1256	0	0.5819			2	Dwarf shrub subsiding	X14	15.2665	15.2665	10.8482	9.0895	15.2665	15.2665	1.8706	9.0427	15.2665	15.2665	15.2665	15.2665
156639	0.0274765	0.00217687	0.033817	8.62616e-08	0.386613	0.217441	0.00103285	0.000158233	0.0822446	0.00404814	0.0359244	0.0101128	0.0173708	0.026636	0.296384	156639	Dwarf shrub subsiding (X14)	0	0	0	0	0.2612	0	0.0025	0.0231	0	0	0	0.0019	0.3438	0	0.3675					Grade of membership (reference)	35.8695	32.179	10.8482	9.0895	46.0093	41.0067	1.8706	9.0427	43.5635	49.1713	33.0086	46.3513
156642	0.0225218	0.0045741	0.0207038	1.18309e-05	0.500386	0.0831613	0.00046461	5.28345e-05	0.0925424	0.00369125	0.0033126	0.00553896	0.0214499	0.0304902	0.43476	156642	Sparse birch forest (X4)	0	0	0	0	0.4701	0	0	0.0541	0.0911	0.0308	0	0.0069	0.0421	0.0434	0.2615					Producer accuracy	100	86.688	100	12.3914	100	100	83.5674	56.572	95.4006	83.7932	100	64.8169
156644	0.122909	0.00281141	0.104641	1.89922e-05	0.356722	0.118519	0.000609045	0.000128181	0.00871807	0.00126031	0.00666618	0.00743625	0.0143938	0.0208842	0.0715081	156644	Sparse birch forest (X4)	0.0017	0	0	0	0.308	0	0	0.0643	0.1777	0.154	0.0034	0.0085	0.0186	0.132	0.132
157461	0.00609877	0.00123377	0.00368987	6.63847e-18	0.364627	0.102061	0.00027813	3.15885e-06	0.0253235	0.000938554	0.0181619	0.00215524	0.0287249	0.0409622	0.14532	157461	Sparse birch forest (X4)	0.0031	0.0131	0	0	0.505	0	0	0.0288	0.0031	0.0406	0	0.0006	0.005	0.0769	0.3238					NOTE: 50 points randomly selected for each class. For classes where no. of points <50, max-1 points were randomly selected (because totals all so low). Exception to this was Dry Lichen Subsiding, which only had 1 point anyway.
157462	0.00292179	0.00063888	0.00248835	4.27626e-19	0.394248	0.050271	0.000203359	1.40834e-06	0.0295372	0.000805856	0.019628	0.00257994	0.0376312	0.0562708	0.138674	157462	Sparse birch forest (X4)	0	0.0025	0	0	0.5062	0	0	0.0869	0.0088	0.15	0.0006	0.0044	0.015	0.1769	0.0488
157465	0.0039225	0.000388182	0.00620981	3.44572e-12	0.424078	0.0845888	0.000279342	1.24732e-06	0.0292277	0.00108942	0.0186676	0.00411485	0.0332704	0.0741219	0.294361	157465	Dwarf shrub subsiding (X14)	0	0.0044	0	0	0.2006	0	0	0.0231	0.0019	0	0.0006	0.0006	0.0319	0.0412	0.6956
157466	0.0156278	0.000213476	0.0157851	6.27484e-11	0.504656	0.0664202	0.000331126	2.27539e-06	0.0552021	0.00163857	0.0107661	0.00739342	0.031549	0.0671643	0.240426	157466	Dwarf shrub subsiding (X14)	0.0012	0	0	0	0.3675	0	0	0.015	0	0	0	0.0006	0.025	0.0294	0.5612					AREA PROPORTIONS
157469	0.0138491	0.00195097	0.0136475	1.30911e-09	0.313992	0.12789	0.000747657	5.33233e-05	0.0458769	0.00351362	0.0533792	0.00914784	0.0257158	0.0466057	0.308254	157469	Sparse birch forest (X4)	0	0	0	0	0.4212	0	0	0.0419	0	0.0019	0.0006	0.0056	0.1294	0.1256	0.2738					9.89213	validation
157475	0.00206232	0.0363764	0.0132202	7.64489e-09	0.513097	0.0419756	0.000350518	0.000510684	0.0908097	0.00223935	0.00134367	0.00298239	0.0152477	0.0104468	0.148583	157475	Sparse birch forest (X4)	0.003	0	0	0	0.3187	0	0	0.1737	0.1556	0.0529	0.0181	0.0151	0.1133	0.0589	0.0906					predicted	Anthropogenic	Water bodies	Exposed rock	Shadows	Sparse birch forest	Forested wetland	Dry lichen	Dry lichen subsiding	Willow wetland	Sphagnum wetland	Sedge / Eriophorum	Moist moss
157476	0.04661	0.0203994	0.0185172	2.52409e-07	0.473616	0.0459975	0.000287347	0.000154147	0.0515836	0.00195888	0.00257391	0.0026058	0.0189365	0.0158526	0.26547	157476	Sparse birch forest (X4)	0	0	0	0	0.407	0	0	0.0116	0.3256	0	0	0	0.0465	0.093	0.1163					Anthropogenic	0.0698595	0.0626719	0.021128	0.0177027	0.0724329	0.0724329	0.00364318	0.0176116	0.0724329	0.0724329	0.0642876	0.0724329
158289	0.159463	0.00300279	0.0178362	2.81507e-11	0.522848	0.0582664	0.000211605	1.5781e-05	0.0417163	0.00109608	0.00460094	0.00198016	0.0233396	0.0227537	0.236258	158289	Sparse birch forest (X4)	0.0675	0	0	0	0.4712	0	0	0.0012	0	0	0	0	0.0094	0	0.4506					Water bodies	0.0551767	0.0551767	0.0214576	0.0179789	0.0551767	0.0551767	0.00370003	0.0178864	0.0551767	0.0551767	0.0551767	0.0551767
158297	0.00368654	0.000625881	0.00329386	7.15827e-19	0.206972	0.0267166	0.00061786	1.18663e-05	0.0582886	0.00795217	0.0439413	0.0174146	0.046002	0.103942	0.0468103	158297	Dry lichen subsiding (X7)	0	0.0225	0	0	0.2012	0	0	0.2069	0.0762	0.0238	0.0569	0.1544	0.0538	0.1212	0.0831					Exposed rock	0.033286	0.033286	0.0293755	0.0246132	0.033286	0.033286	0.00506535	0.0244865	0.033286	0.033286	0.033286	0.033286
158298	0.0375581	0.000684314	0.0173641	1.96878e-10	0.439988	0.127855	0.000316452	4.13756e-06	0.0418942	0.00170759	0.017663	0.00258896	0.0210506	0.0405045	0.177276	158298	Sparse birch forest (X4)	0	0	0	0	0.5894	0	0	0.0244	0	0	0.0012	0.0012	0.0275	0.0419	0.3144					Shadows	0.00345916	0.00345916	0.00345916	0.00345916	0.00345916	0.00345916	0.00345916	0.00345916	0.00345916	0.00345916	0.00345916	0.00345916
158300	0.0131764	0.00578682	0.0350101	2.95543e-05	0.316292	0.294248	0.00155952	0.000439486	0.137507	0.0076386	0.0371317	0.012858	0.0124846	0.0202175	0.294823	158300	Dwarf shrub subsiding (X14)	0.0069	0	0	0	0.1206	0	0	0	0	0	0	0	0.0056	0	0.8669					Sparse birch forest	0.0815127	0.0731261	0.0246523	0.0206557	0.104555	0.0931869	0.0042509	0.0205494	0.0989972	0.111741	0.0750114	0.105332
158302	0.188858	0.00356928	0.0436422	0.000255211	0.47128	0.0785385	0.000344592	3.34555e-05	0.0782507	0.00418463	0.00457241	0.00305611	0.0162953	0.0257285	0.208385	158302	Dwarf shrub subsiding (X14)	0.0038	0.0012	0	0	0.2625	0	0	0	0	0	0.0006	0	0.0075	0	0.7244					Forested wetland	0.119937	0.107597	0.0362732	0.0303926	0.153841	0.137114	0.00625473	0.0302361	0.145663	0.163093	0.110371	0.154985
159117	0.557595	0.000263214	0.0348883	2.61612e-31	0.458434	0.00491588	9.68621e-05	4.43634e-06	0.05717	0.00286007	0.000334333	0.00103062	0.0150078	0.0115601	2.51268e-05	159117	Sparse birch forest (X4)	0.2709	0.0018	0	0	0.517	0	0	0	0	0	0	0	0.0018	0	0.2084					Dry lichen	0.00425267	0.00425267	0.00425267	0.00425267	0.00425267	0.00425267	0.00425267	0.00425267	0.00425267	0.00425267	0.00425267	0.00425267
159125	0.039023	0.000123756	0.00111549	3.5513e-49	0.0393217	0.00680656	0.00186109	2.2135e-05	0.427241	0.187733	0.0345888	0.0710853	0.0371802	0.0669841	4.82198e-06	159125	Willow wetland (X8)	0	0.0031	0	0	0.0125	0	0	0.0712	0.575	0.0294	0.0375	0.2	0.0094	0.0612	0.0006					Dry lichen subsiding	0.0132412	0.0132412	0.0132412	0.0132412	0.0132412	0.0132412	0.00484183	0.0132412	0.0132412	0.0132412	0.0132412	0.0132412
159127	0.00600206	0.000279361	0.00915515	5.48069e-11	0.390679	0.0753378	0.000307504	1.24909e-06	0.0319223	0.00174118	0.0212248	0.00496699	0.0308406	0.083861	0.184277	159127	Dwarf shrub subsiding (X14)	0	0	0	0	0.4356	0	0	0.0019	0	0	0	0	0.0375	0.0675	0.4575					Willow wetland	0.106947	0.0959432	0.0323444	0.0271008	0.123913	0.122263	0.00557728	0.0269612	0.123913	0.123913	0.0984166	0.123913
159128	0.044994	0.000441345	0.0394861	6.04611e-09	0.451996	0.2009	0.000545405	1.11645e-05	0.0536246	0.00259078	0.0225305	0.00449933	0.0172201	0.0365442	0.141396	159128	Dwarf shrub subsiding (X14)	0.0006	0	0	0	0.1569	0	0	0.0006	0	0	0	0	0.0244	0	0.8175					Sphagnum wetland	0.0873778	0.0783878	0.0264261	0.022142	0.100368	0.099892	0.00455677	0.022028	0.100368	0.100368	0.0804087	0.100368
159135	0.195459	0.0147872	0.0461211	3.32215e-05	0.453538	0.0591701	0.000287098	0.000143718	0.0367931	0.00213672	0.002918	0.00207306	0.0141871	0.0138168	0.137604	159135	Sparse birch forest (X4)	0	0	0	0	0.434	0	0	0.0404	0.1638	0.0099	0.0043	0.0043	0.0312	0.0624	0.2496					Sedge / Eriophorum	0.140678	0.126204	0.042546	0.0356485	0.147766	0.147766	0.00733639	0.035465	0.147766	0.147766	0.129458	0.147766
159137	0.129846	0.0296849	0.0532518	0.000218805	0.378203	0.103906	0.000429142	0.000512374	0.0255833	0.00226159	0.00624627	0.00215144	0.0115377	0.0108599	0.129641	159137	Willow wetland (X8)	0	0	0	0	0.1523	0	0.0051	0.0711	0.2234	0.0051	0.0152	0.066	0.1421	0.1168	0.203					Moist moss	0.0823056	0.0823056	0.0297192	0.0249011	0.0823056	0.0823056	0.0051246	0.0247729	0.0823056	0.0823056	0.0823056	0.0823056
159945	0.258342	0.00219298	0.0170875	2.8167e-22	0.442247	0.00590413	0.000169537	4.02514e-05	0.0533306	0.00228211	0.00090695	0.00373208	0.0268591	0.0176381	0.00354558	159945	Anthropogenic (X0)	0.6552	0.046	0	0	0.1552	0	0	0	0	0	0	0	0	0	0.1437					Moist moss subsiding	0.0121412	0.0121412	0.0121412	0.0121412	0.0121412	0.0121412	0.00429076	0.0121412	0.0121412	0.0121412	0.0121412	0.0121412
159956	0.00111498	0.000262458	0.00363311	3.35536e-15	0.337221	0.0357546	0.000367738	1.71656e-06	0.034771	0.00197578	0.0221143	0.0120604	0.047626	0.117303	0.169596	159956	Sparse birch forest (X4)	0	0	0	0	0.3194	0	0.0006	0.0575	0.0175	0.0212	0.0181	0.0462	0.1725	0.0975	0.2494					Dwarf shrub	0.0319884	0.0319884	0.0252445	0.0211519	0.0319884	0.0319884	0.00435301	0.021043	0.0319884	0.0319884	0.0319884	0.0319884
159959	0.0170901	0.00110262	0.0113816	4.5146e-12	0.438466	0.0551726	0.000424528	1.58195e-05	0.0585069	0.00240856	0.00890673	0.00817905	0.032061	0.0487559	0.252229	159959	Dwarf shrub subsiding (X14)	0.0256	0	0	0	0.1363	0	0	0	0	0	0	0	0.0094	0	0.8288					Dwarf shrub subsiding	0.0230639	0.0230639	0.016389	0.013732	0.0230639	0.0230639	0.00282602	0.0136613	0.0230639	0.0230639	0.0230639	0.0230639
159961	0.0406797	0.00421886	0.0258868	6.20924e-06	0.329321	0.259529	0.00103935	9.38307e-05	0.103596	0.00526398	0.023706	0.00920853	0.0154094	0.026146	0.404914	159961	Dwarf shrub subsiding (X14)	0.0056	0.0025	0	0	0.1581	0	0	0	0	0	0	0	0.0025	0	0.8312					Total	0.865227	0.802845	0.33865	0.289114	0.961791	0.93157	0.0695327	0.287795	0.948055	0.978229	0.816868	0.963712
159964	0.0150471	0.0344228	0.0145877	1.15637e-06	0.154169	0.631796	0.00156623	0.000195523	0.114291	0.00825513	0.0562914	0.00320125	0.00628571	0.0107078	0.174248	159964	Dwarf shrub subsiding (X14)	0	0.0012	0	0	0.4569	0	0	0.0044	0	0	0	0.0006	0.0106	0	0.5262					Producer accuracy	8.07413	6.87265	8.67431	1.19647	10.8709	10.0032	6.11607	4.60092	13.0702	10.2602	15.8481	8.54048
159965	0.031012	0.00858897	0.0180516	1.34935e-07	0.460273	0.0516746	0.000337677	4.99618e-05	0.0688476	0.00376805	0.00134577	0.00329978	0.0191705	0.0241354	0.179738	159965	Dwarf shrub subsiding (X14)	0	0	0	0	0.311	0	0	0.0415	0.1085	0.0028	0.0007	0.0083	0.0933	0.0484	0.3856
159966	0.0982252	0.00387089	0.0542694	8.23359e-08	0.420644	0.174067	0.000491288	8.71248e-05	0.0266941	0.00180765	0.00906946	0.00268008	0.0128245	0.0162208	0.0992079	159966	Sparse birch forest (X4)	0	0.0386	0	0	0.2948	0	0	0.0138	0.2011	0.0028	0	0	0.0771	0.157	0.2149
160778	0.0901219	0.000976684	0.0252912	1.11571e-13	0.41192	0.0770214	0.000275075	1.14548e-05	0.0306164	0.00156441	0.0145313	0.00208955	0.0180754	0.0254838	0.0349993	160778	Sparse birch forest (X4)	0.0406	0.0562	0	0	0.7275	0	0.0006	0.0012	0	0	0.0012	0.0006	0.0138	0.0006	0.1575
160788	0.0205014	0.000191416	0.0422044	1.65504e-10	0.535995	0.0829065	0.00085838	2.98424e-05	0.0884535	0.00276197	0.00905119	0.0328905	0.0306671	0.0536339	0.25025	160788	Sparse birch forest (X4)	0.0006	0.0012	0	0	0.4381	0	0.0006	0.03	0	0.0006	0.0031	0.0194	0.14	0.0012	0.365
160789	0.00925731	0.00024731	0.0193103	1.03024e-14	0.51249	0.0583672	0.000707138	2.2715e-05	0.0717404	0.00201502	0.00703471	0.0282755	0.0369942	0.0538975	0.19758	160789	Sparse birch forest (X4)	0	0	0	0	0.4594	0	0.0006	0.0088	0	0	0	0.0006	0.17	0.0088	0.3519
160790	0.00593055	0.000418352	0.00774649	6.50903e-11	0.419644	0.0499338	0.000284169	1.94729e-06	0.034242	0.00146607	0.0148003	0.00633435	0.0364941	0.0813963	0.280644	160790	Dwarf shrub subsiding (X14)	0.0006	0	0	0	0.2481	0	0.0012	0.0462	0.0006	0.0019	0	0.0069	0.1688	0.1075	0.4181
160795	0.00728517	0.00835217	0.0251094	6.37646e-07	0.446885	0.113467	0.000438036	7.93433e-05	0.0852945	0.00490927	0.00242857	0.00210037	0.0114993	0.0168062	0.0745479	160795	Sparse birch forest (X4)	0	0	0	0	0.4577	0	0	0.0268	0.2604	0.0134	0	0.0013	0.0242	0.0819	0.1342
161617	0.0101192	0.00102783	0.00924992	1.76368e-19	0.142114	0.0497505	0.00141161	0.000130861	0.108644	0.0243974	0.0825649	0.0263598	0.0254094	0.0552053	0.00742968	161617	Sparse birch forest (X4)	0	0	0	0	0.2788	0	0	0.255	0.0075	0.2725	0.0238	0.0344	0.0481	0.0688	0.0112
162433	0.887509	0.00725229	0.0438999	3.68141e-80	0.0517439	0.000612833	0.000111775	0.00204547	0.00257602	0.00913431	4.22687e-06	5.96286e-05	0.00200895	0.000204493	2.85155e-14	162433	Anthropogenic (X0)	0.8894	0	0	0	0.0925	0	0	0	0	0	0	0	0	0	0.0181
162434	0.839583	0.000314758	0.0186814	2.82092e-55	0.569193	0.00056599	5.41781e-05	1.34635e-05	0.120816	0.00273447	4.23998e-06	0.000606675	0.0151293	0.00269923	6.99038e-08	162434	Anthropogenic (X0)	0.7662	0.0012	0	0	0.2125	0	0	0	0	0	0	0	0	0	0.02
162437	0.000269004	0.000181791	0.000466388	4.60295e-42	0.102945	0.000319604	0.000339358	5.68178e-06	0.0657414	0.0244631	0.00225179	0.0550673	0.0947075	0.159469	2.70816e-05	162437	Dwarf shrub subsiding (X14)	0.0531	0.0019	0	0	0.2275	0	0	0.0169	0.0431	0.0138	0.0156	0.0744	0.1956	0.0456	0.3125
162449	0.0255231	0.00107752	0.0284797	2.90068e-08	0.422263	0.179191	0.00067947	2.7089e-05	0.0649097	0.00330376	0.0157765	0.00677974	0.0188292	0.0356029	0.235424	162449	Dwarf shrub subsiding (X14)	0	0.0031	0	0	0.2675	0	0.0006	0.0019	0	0	0	0.005	0.0744	0	0.6475
163261	0.84912	0.0027832	0.0945017	4.12337e-73	0.100629	0.00224574	0.00020456	0.00241871	0.00380776	0.00538771	5.91146e-06	0.000168089	0.00222596	0.000257614	7.54111e-13	163261	Anthropogenic (X0)	0.89	0.0019	0	0	0.1006	0	0	0	0	0	0	0	0	0	0.0075
163265	0.152495	0.00173642	0.0564779	6.07899e-09	0.480104	0.0844453	0.000384285	4.31665e-05	0.0290429	0.00143684	0.00474917	0.00437968	0.0173417	0.021033	0.0973784	163265	Dwarf shrub subsiding (X14)	0.0394	0.0006	0	0	0.2262	0	0.0006	0	0	0	0	0	0.0162	0	0.7169
163267	0.00506144	0.000428501	0.00577653	4.60122e-22	0.254631	0.0101775	0.000691157	3.56787e-05	0.108036	0.0129573	0.0115614	0.0350066	0.0464723	0.0827337	0.00951855	163267	Sparse birch forest (X4)	0	0	0	0	0.3356	0	0	0.1919	0.0012	0.035	0.0644	0.0862	0.0688	0.2031	0.0138
163268	0.01716	0.000603733	0.00348636	1.19726e-34	0.0566613	0.0354552	0.0025758	0.000116698	0.209877	0.07456	0.0594579	0.0578879	0.0250285	0.0472507	0.000172746	163268	Dry lichen subsiding (X7)	0	0	0	0	0.1081	0	0	0.3012	0.0062	0.2244	0.0625	0.0725	0.0294	0.1956	0
163281	0.14685	0.00652187	0.061858	7.06726e-05	0.413424	0.167681	0.000592354	0.000258842	0.0266395	0.0017125	0.0192653	0.00432126	0.0148643	0.0168167	0.284445	163281	Sparse birch forest (X4)	0	0	0	0	0.3018	0	0.0007	0.0205	0.1876	0.0063	0.0021	0.0113	0.1953	0.0733	0.201
163282	0.208585	0.000171944	0.0380421	1.15292e-11	0.476475	0.0882143	0.000172834	3.37472e-07	0.0437726	0.00308097	0.00227012	0.00100945	0.0147286	0.0435826	0.0127979	163282	Willow wetland (X8)	0	0	0	0	0.08	0	0	0	0.8	0	0	0	0	0.12	0
164090	0.936816	0.00528407	0.0490642	1.16439e-74	0.112575	0.000544816	0.000100899	0.00137875	0.00614983	0.00642327	2.09679e-06	0.000116249	0.00306944	0.000280796	7.70815e-13	164090	Anthropogenic (X0)	0.88	0	0	0	0.1188	0	0	0	0	0	0	0	0	0	0.0012
164093	0.627987	0.00564433	0.117117	0.00025878	0.609584	0.126244	0.000327063	0.000142756	0.0499297	0.00128691	0.00312942	0.00216621	0.0126682	0.0102684	0.277629	164093	Sparse birch forest (X4)	0.22	0.0012	0	0	0.4894	0	0	0	0	0	0	0	0	0	0.2894
164094	0.273346	0.00502056	0.0835937	1.27318e-06	0.476218	0.145364	0.000470445	0.00017097	0.0314209	0.00166448	0.00621954	0.00303468	0.0127638	0.0129127	0.131315	164094	Dwarf shrub subsiding (X14)	0.0656	0.0012	0	0	0.3094	0	0	0.0006	0	0	0	0	0.0031	0	0.62
164106	0.0167955	0.00110977	0.0228178	1.88969e-12	0.426886	0.118696	0.000709194	8.17684e-05	0.0478687	0.0018758	0.0280592	0.0101271	0.0240181	0.0305018	0.192938	164106	Dwarf shrub subsiding (X14)	0.0019	0	0	0	0.1381	0	0.0012	0.0188	0.3144	0	0.0012	0.0106	0.1094	0.0669	0.3375
164107	0.00939206	0.00208208	0.0197464	3.18761e-13	0.41951	0.189403	0.0010449	0.000281233	0.0462248	0.00161763	0.0407892	0.0124428	0.0236851	0.0239743	0.316712	164107	Dwarf shrub subsiding (X14)	0.0006	0.0012	0	0	0.2375	0	0.0025	0.0144	0.2331	0.0081	0	0.0012	0.0288	0.07	0.4025
164108	0.0082279	0.00317136	0.0222997	3.45032e-09	0.299653	0.241712	0.000966801	0.000210687	0.0263404	0.00214245	0.119627	0.00690754	0.0179834	0.0271967	0.233025	164108	Sparse birch forest (X4)	0	0	0	0	0.4106	0	0	0.0088	0.1281	0.015	0	0.0006	0.0094	0.0475	0.38
164109	0.0199178	0.0013212	0.0171005	1.80184e-09	0.419008	0.143427	0.000381524	8.97031e-06	0.0369763	0.00196472	0.013362	0.00275737	0.0195558	0.036475	0.188942	164109	Dwarf shrub subsiding (X14)	0	0	0	0	0.3488	0	0	0.0069	0.165	0	0.0006	0.0012	0.0675	0.06	0.35
164919	0.895755	0.00257779	0.0411033	1.82395e-73	0.0278406	0.0525173	0.000618092	0.00043406	0.009834	0.0111754	0.000181394	0.000167896	0.0011575	0.000253002	2.14997e-12	164919	Anthropogenic (X0)	0.7952	0	0	0	0.2042	0	0	0	0	0	0	0	0	0	0.0006
164921	0.491196	0.000959087	0.0341003	1.93203e-10	0.520472	0.00946871	0.000114213	3.89561e-06	0.0560832	0.00234306	0.0011987	0.00257634	0.0252118	0.0345504	0.0327803	164921	Anthropogenic (X0)	0.6331	0	0	0	0.3619	0	0	0	0	0	0	0	0	0	0.005
164922	0.343133	0.00343522	0.0580692	6.03987e-06	0.555132	0.0807387	0.000244189	2.72889e-05	0.0534922	0.00189069	0.00237898	0.00174284	0.0146068	0.0170394	0.156509	164922	Sparse birch forest (X4)	0.2806	0.0006	0	0	0.4569	0	0	0	0	0	0	0	0	0	0.2619
164923	0.234368	0.0149808	0.0618615	2.50828e-06	0.488853	0.140688	0.000335618	0.000269495	0.036901	0.00142648	0.00745386	0.00126367	0.0106437	0.00837354	0.13921	164923	Dwarf shrub subsiding (X14)	0.1625	0	0	0	0.4162	0	0	0.0006	0	0	0	0	0	0	0.4206
164924	0.425923	0.0037629	0.0369524	4.26423e-08	0.436635	0.0934692	0.000192477	1.15224e-05	0.0297933	0.00185349	0.00629469	0.000790646	0.0138552	0.0189714	0.0773254	164924	Sparse birch forest (X4)	0.2788	0.0044	0	0	0.4456	0	0	0	0	0	0	0	0.0006	0	0.2706
164926	0.0335829	0.0116639	0.0663271	3.26731e-06	0.431114	0.0627012	0.000431743	0.000417976	0.0453522	0.00301665	0.00289014	0.0032342	0.0104859	0.010775	0.0319755	164926	Dwarf shrub subsiding (X14)	0.2338	0	0	0	0.3675	0	0	0	0	0	0	0	0.0012	0	0.3975
164933	0.00190722	0.00255378	0.00271338	3.77929e-20	0.201726	0.206307	0.000504264	8.68417e-06	0.019023	0.00181696	0.0580329	0.00191288	0.0204624	0.0345998	0.0430222	164933	Willow wetland (X8)	0	0	0	0	0.2344	0	0	0.0038	0.3706	0.0012	0	0	0.0194	0.2338	0.1369
164935	0.0022265	0.00162103	0.00528416	2.02909e-15	0.257034	0.166012	0.000645224	1.56231e-05	0.0283345	0.00251956	0.0482879	0.00474864	0.0240663	0.0464817	0.11353	164935	Dwarf shrub subsiding (X14)	0	0	0	0	0.2575	0	0	0.0056	0.2269	0.0038	0.0012	0.0019	0.0175	0.1088	0.3769
164936	0.00536264	0.000334565	0.00814965	3.20031e-11	0.427749	0.0654908	0.000299164	1.45242e-06	0.0392717	0.00169646	0.0133096	0.00541982	0.0330597	0.0803023	0.237658	164936	Dwarf shrub subsiding (X14)	0	0	0	0	0.15	0	0.0006	0.0088	0.3038	0.0062	0.0019	0.0025	0.0181	0.1488	0.3594
164937	0.00848287	0.000478532	0.00862354	2.10662e-10	0.428649	0.111825	0.000263249	1.33118e-06	0.0270653	0.00108238	0.0226261	0.00277717	0.0280202	0.0638425	0.310657	164937	Willow wetland (X8)	0	0	0	0	0.2725	0	0.0025	0.0138	0.3075	0.0081	0.005	0.0031	0.0288	0.1194	0.2394
164938	0.00824075	0.000284922	0.00773339	2.89696e-10	0.405965	0.0458	0.000187499	3.74831e-07	0.0299427	0.00171832	0.00828903	0.00309815	0.0313864	0.0941455	0.143274	164938	Willow wetland (X8)	0	0	0	0	0.1033	0	0	0.0207	0.3926	0.0165	0	0	0.0992	0.1983	0.1694
165754	0.582823	0.00321205	0.0474235	7.21843e-23	0.359246	0.00269661	0.000149805	6.89157e-05	0.0234308	0.0031381	0.000140475	0.0034342	0.0180947	0.0118865	0.000164576	165754	Anthropogenic (X0)	0.6269	0.0012	0	0	0.315	0	0	0	0	0	0	0	0	0	0.0569
165756	0.38066	0.00193707	0.0993026	3.27359e-08	0.319626	0.0283916	0.00027535	3.52858e-05	0.0157324	0.003141	0.00349424	0.00336466	0.0132861	0.0226317	0.00530602	165756	Anthropogenic (X0)	0.5256	0.0081	0	0	0.3781	0	0	0	0	0	0	0	0	0	0.0881
165760	0.0319386	0.00797603	0.0382393	1.90753e-07	0.530976	0.0880669	0.000359968	0.000129202	0.0767581	0.00248446	0.00226093	0.00226433	0.0125641	0.0124144	0.105979	165760	Dwarf shrub subsiding (X14)	0.0212	0	0	0	0.3625	0	0.0006	0.0394	0.0038	0.0019	0.0006	0.0069	0.0756	0.0231	0.4644
165762	0.00885755	0.00367393	0.0100567	8.42592e-16	0.325191	0.24033	0.000473847	3.42135e-05	0.0220374	0.00144198	0.0307546	0.00142456	0.0152607	0.0192199	0.062746	165762	Willow wetland (X8)	0	0	0	0	0.2519	0	0	0.0012	0.38	0.0006	0	0.0006	0.0044	0.0938	0.2675
165763	0.00205114	0.000851817	0.00370179	1.43825e-14	0.358816	0.111533	0.000272434	1.50241e-06	0.0205729	0.00102662	0.0205532	0.00221968	0.029121	0.0597303	0.196628	165763	Dwarf shrub subsiding (X14)	0	0	0	0	0.2144	0	0	0.0056	0.3094	0.0025	0.0006	0.0012	0.0019	0.1312	0.3331
167407	0.700432	0.00305642	0.0855508	7.40782e-09	0.511486	0.0404862	0.000180788	4.26593e-05	0.0477351	0.00196393	0.00405907	0.00127219	0.0128211	0.0124112	0.0264194	167407	Anthropogenic (X0)	0.5059	0	0	0	0.4941	0	0	0	0	0	0	0	0	0	0
167408	0.648329	0.00472163	0.0362999	1.48622e-11	0.537978	0.00421929	0.000118702	3.22449e-05	0.0445357	0.00176769	0.000282325	0.0041257	0.0284823	0.0207376	0.0362127	167408	Anthropogenic (X0)	0.5312	0	0	0	0.4688	0	0	0	0	0	0	0	0	0	0
167411	0.295864	0.00134573	0.148903	9.96672e-08	0.3333	0.126005	0.000618803	0.000116409	0.0359364	0.00481025	0.0176794	0.00420547	0.00946631	0.0167811	0.00933872	167411	Anthropogenic (X0)	0.6694	0	0	0	0.3306	0	0	0	0	0	0	0	0	0	0
167419	0.0162519	0.0404089	0.025544	4.09203e-07	0.41887	0.0692952	0.000334084	0.00048006	0.04181	0.00210553	0.00373128	0.00159268	0.0114651	0.00908884	0.0842597	167419	Dwarf shrub subsiding (X14)	0.0916	0	0	0	0.1907	0	0	0.0006	0	0	0	0	0.0389	0.0082	0.67
167420	2.90829e-07	0.024897	0.00181387	2.98702e-19	0.318487	0.0303124	0.000370145	0.000292562	0.119009	0.00433209	0.00338595	0.00154721	0.00933239	0.00987357	0.00129999	167420	Dwarf shrub subsiding (X14)	0.0016	0	0	0	0.0556	0	0	0.0147	0.2974	0.0033	0.0033	0.0278	0.1275	0.0784	0.3905
168242	0.39766	0.00875858	0.0755783	0.000525902	0.34143	0.152972	0.00057836	0.000385849	0.0511227	0.0037282	0.054437	0.00323771	0.0118132	0.0143662	0.163499	168242	Sparse birch forest (X4)	0.4624	0	0	0	0.5376	0	0	0	0	0	0	0	0	0	0
172897	1.55425e-34	0.481961	1.31776e-12	1.24209e-76	0.107894	0.0755023	0.000349586	1.5363e-14	0.0360485	0.00897251	2.16961e-19	0.000258787	0.0089688	0.212488	2.3447e-08	172897	Sparse birch forest (X4)	0	0.0348	0	0	0.8815	0.0836	0	0	0	0	0	0	0	0	0
172906	9.92e-20	0.444507	8.36273e-07	5.88293e-27	0.0170103	0.00243505	0.000201455	5.91988e-07	0.161974	0.0666466	8.37767e-06	0.000509993	0.0022731	0.0274181	3.93082e-08	172906	Sparse birch forest (X4)	0	0.0051	0	0.0102	0.2959	0.1658	0.0026	0	0.0842	0.1964	0	0	0	0.199	0.0408
173731	9.64623e-05	0.00943932	0.00776572	9.16251e-16	0.048128	0.414161	0.00259007	0.000385208	0.123438	0.0526405	0.406909	0.00415386	0.00459982	0.0164801	0.000524018	173731	Sphagnum wetland (X9)	0	0	0	0	0.0519	0.002	0	0	0.0513	0.7837	0.0368	0.0204	0.0026	0.0375	0.0138
173732	4.00726e-06	0.008188	0.00360433	1.96969e-16	0.0351551	0.282916	0.0030098	0.000261329	0.284254	0.110139	0.37965	0.00784089	0.00428612	0.0207607	0.00019533	173732	Sphagnum wetland (X9)	0	0	0	0	0	0	0	0	0.0013	0.9698	0	0	0.0072	0.0217	0
173741	0.000140568	0.039151	0.00468423	2.33895e-11	0.0335829	0.222718	0.00127778	0.000143136	0.168578	0.0783684	0.248083	0.00195103	0.00372568	0.0154589	0.000427243	173741	Water bodies (X1)	0	1	0	0	0	0	0	0	0	0	0	0	0	0	0
174558	0.000656639	0.0042757	0.00643564	4.74153e-15	0.200132	0.342518	0.000556571	1.30686e-05	0.0194717	0.00415369	0.0284774	0.000760404	0.00986756	0.0248506	0.0104652	174558	Sparse birch forest (X4)	0	0.0026	0	0.0092	0.2945	0.2137	0	0	0.0953	0.0467	0.0197	0.0934	0.0007	0.1578	0.0664
174566	2.96489e-07	0.0301372	0.00212843	1.33813e-16	0.0142924	0.0489423	0.00241467	0.000982632	0.214572	0.204438	0.400765	0.0117655	0.00402046	0.0217144	1.1978e-05	174566	Sedge wetland (X10)	0.0066	0.0105	0	0	0	0.0329	0	0	0.0276	0.1144	0.8047	0.002	0	0.0007	0.0007
174569	0.00712981	0.012788	0.00411431	1.30102e-16	0.0697607	0.458049	0.00114455	3.32799e-05	0.0629618	0.0116848	0.190779	0.00191047	0.00790209	0.0184908	0.0110228	174569	Forested wetland (X5)	0	0.0072	0.0144	0	0	0.8297	0	0	0.028	0	0.0395	0	0	0.0812	0
175388	0.00166927	0.0235689	0.00993849	3.42323e-12	0.0315436	0.207342	0.00259594	0.000457366	0.120171	0.0870928	0.168096	0.010416	0.00572407	0.0207379	0.000893461	175388	Sphagnum wetland (X9)	0	0.0007	0	0	0.1012	0.002	0	0	0.0158	0.5602	0.0059	0.0329	0	0.261	0.0204
176209	8.76272e-24	0.480794	2.7453e-08	6.56556e-36	0.209314	8.81295e-05	3.24169e-05	9.29645e-09	0.0221848	0.0018332	4.5441e-11	0.000740872	0.0162561	0.0759656	1.01492e-06	176209	Water bodies (X1)	0.0009	0.9228	0	0	0.0151	0.0113	0	0	0.0348	0.0047	0.0075	0	0	0.0009	0.0019
176210	1.18239e-18	0.702446	1.27779e-06	1.18838e-16	0.191966	2.15742e-05	2.52548e-05	1.29569e-06	0.0101614	0.000832988	2.86725e-08	0.0027027	0.0231125	0.0582041	5.79772e-05	176210	Water bodies (X1)	0	0.8647	0	0.0059	0	0	0	0	0.1294	0	0	0	0	0	0
176213	6.43053e-25	0.444694	8.71475e-09	9.86231e-37	0.258123	5.07933e-05	2.31327e-05	1.3172e-09	0.0258562	0.00162021	4.39964e-12	0.000807446	0.0223034	0.120476	1.85267e-06	176213	Sparse birch forest (X4)	0	0.0131	0	0.0046	0.7179	0.2032	0	0	0.0605	0	0	0	0	0.0007	0
176230	0.000188877	0.024179	0.00342599	2.42713e-17	0.0225958	0.0634487	0.001622	0.000329356	0.24044	0.168352	0.273061	0.00659279	0.00569165	0.021797	8.32119e-05	176230	Willow wetland (X8)	0.0118	0.0184	0.0782	0	0	0.3123	0.0066	0.0007	0.5713	0	0	0.0007	0	0	0
177047	2.32707e-07	0.0212861	0.00748153	2.82882e-15	0.0145063	0.0646363	0.00517307	0.00663462	0.14776	0.188147	0.324059	0.0414333	0.00338295	0.0170027	6.48543e-06	177047	Sphagnum wetland (X9)	0.0026	0.0138	0	0	0	0.0355	0	0	0.3511	0.3899	0.188	0.0138	0.0053	0	0
177882	0.00342288	0.00250373	0.0254583	8.40939e-16	0.146215	0.447051	0.00342172	0.000437861	0.231746	0.0297898	0.0653939	0.015577	0.00713087	0.0154072	0.00534351	177882	Forested wetland (X5)	0.0112	0.0204	0.1999	0.0033	0	0.4839	0.0039	0.0013	0.265	0	0.0085	0.0007	0	0	0.002
177887	4.94469e-06	0.00920748	0.00298759	3.8064e-25	0.0299291	0.0214276	0.00186327	0.000414811	0.366585	0.200028	0.0263993	0.0160063	0.0052263	0.0171059	3.31579e-06	177887	Willow wetland (X8)	0.0013	0.0335	0.0131	0	0	0.0855	0.0026	0	0.858	0	0	0.0039	0	0	0.002
177888	5.16001e-09	0.142177	0.000434278	1.38528e-12	0.0303954	0.0113184	0.000469001	4.64029e-05	0.270232	0.116828	0.00545919	0.00202425	0.00368257	0.0198377	1.77961e-05	177888	Willow wetland (X8)	0	0.0296	0.0039	0.0033	0	0.1262	0.0007	0	0.7594	0	0	0.0158	0	0.0007	0.0605
177890	5.68291e-21	0.53811	2.12734e-07	9.36485e-33	0.0213178	0.00821635	0.000375162	9.49968e-08	0.0510467	0.0328879	3.60362e-08	0.00102384	0.00338112	0.0398278	1.60068e-07	177890	Forested wetland (X5)	0.0011	0.0785	0.0885	0.0011	0.0055	0.594	0.0022	0	0.0885	0	0.0011	0.0664	0	0.0675	0.0055
178689	1.27477e-11	0.391177	7.48045e-05	3.79294e-15	0.0838548	0.022771	0.000282124	4.14826e-06	0.0766332	0.00947526	7.96928e-06	0.001057	0.00407648	0.0134938	0.00013429	178689	Water bodies (X1)	0	0.4751	0	0.0036	0.037	0.399	0	0	0.0839	0.0014	0	0	0	0	0
178700	1.03307e-18	0.404294	7.05481e-07	2.83279e-26	0.267916	0.000310684	5.7184e-05	9.60459e-08	0.0360446	0.00344855	6.49995e-10	0.00116206	0.0160834	0.0578046	2.43128e-05	178700	Water bodies (X1)	0	0.6685	0	0	0	0.2965	0	0	0.0271	0.0011	0.0068	0	0	0	0
178703	0.00333647	0.00672287	0.0463876	6.86342e-17	0.0344405	0.148274	0.00834402	0.0116777	0.15282	0.149853	0.145033	0.0936003	0.00625926	0.0167155	0.0001301	178703	Sphagnum wetland (X9)	0.0723	0.0237	0.1183	0.0007	0.0053	0.0447	0.0092	0.002	0.0316	0.3287	0.1933	0.1105	0.0388	0.0007	0.0204
178710	1.39373e-05	0.00462617	0.0079595	1.15952e-19	0.0401143	0.284917	0.00546385	0.000899427	0.265804	0.120341	0.175135	0.0241082	0.00477316	0.0181968	0.000106581	178710	Willow wetland (X8)	0.002	0.0552	0.0072	0.0079	0	0.403	0.0046	0	0.453	0	0.0513	0.0072	0	0	0.0085
179522	1.07756e-20	0.529149	1.36984e-07	2.53182e-29	0.244188	8.56494e-05	2.75065e-05	1.85237e-08	0.0206691	0.00190083	1.10961e-10	0.000769651	0.0191181	0.0730457	7.95685e-06	179522	Water bodies (X1)	0	0.9659	0	0	0.0029	0	0	0	0.0302	0	0	0	0	0.001	0
179528	4.80507e-26	0.539919	9.54052e-09	1.31653e-35	0.15315	2.69499e-05	2.43233e-05	9.15198e-09	0.0295315	0.00246932	1.09773e-10	0.000771314	0.0152941	0.0946908	2.22732e-07	179528	Forested wetland (X5)	0	0.0348	0	0	0	0.607	0	0	0.005	0	0.3532	0	0	0	0
179533	1.14261e-06	0.00672253	0.0207052	1.03612e-14	0.021636	0.0483718	0.0066701	0.0139784	0.17613	0.225624	0.329107	0.0911388	0.00423726	0.0207767	7.16072e-06	179533	Sphagnum wetland (X9)	0.0007	0.0059	0.0007	0.0256	0	0.0197	0	0	0.0053	0.4241	0.4122	0.0158	0.0164	0.0079	0.0657
179545	3.1829e-10	0.0451078	0.000642925	2.07037e-16	0.0223167	0.0221925	0.00206322	0.00030712	0.245423	0.166961	0.00838028	0.0195565	0.00408698	0.0257917	7.78724e-06	179545	Willow wetland (X8)	0.0013	0.215	0	0	0	0.0414	0.0125	0	0.3544	0.0059	0.0657	0.2847	0	0.0026	0.0164
179546	4.37563e-21	0.338379	7.44474e-07	8.60051e-24	0.0171024	0.00130086	0.000280235	1.59469e-06	0.21544	0.0653118	2.74677e-05	0.00202424	0.00291567	0.0402001	8.21298e-08	179546	Water bodies (X1)	0	0.422	0	0.0009	0.0009	0.1108	0	0	0.2465	0	0.1152	0.0789	0	0.0062	0.0186
179548	1.60148e-31	0.655811	3.86075e-10	2.70332e-46	0.0106829	0.000691418	0.000242648	2.39399e-09	0.0657345	0.0381794	3.21435e-10	0.00145337	0.00396561	0.115883	1.07974e-09	179548	Dwarf shrub (X13)	0	0	0	0	0	0	0	0	0	0	0	0	0	1	0
180343	2.54553e-24	0.553623	1.32137e-08	5.50089e-38	0.0286779	0.00187688	0.000187008	3.78763e-09	0.047456	0.0182258	4.41174e-10	0.00119684	0.00583917	0.0812478	1.29105e-07	180343	Water bodies (X1)	0	0.7653	0	0.0015	0.0552	0.0123	0	0	0.1656	0	0	0	0	0	0
180354	4.08405e-26	0.657965	6.40727e-09	1.19799e-34	0.0409396	0.000503499	8.87186e-05	4.19863e-09	0.024889	0.00275325	7.84889e-10	0.00153568	0.00777168	0.0785343	4.51477e-07	180354	Water bodies (X1)	0	0.9394	0	0.0606	0	0	0	0	0	0	0	0	0	0	0
180357	2.26087e-17	0.941321	3.33368e-07	4.43905e-35	0.0385441	0.0711921	0.000419007	4.48446e-08	0.00128034	0.00187319	4.14936e-11	0.000625994	0.00566428	0.0208579	1.81386e-05	180357	Water bodies (X1)	0	1	0	0	0	0	0	0	0	0	0	0	0	0	0
180366	8.71428e-05	0.00645561	0.0195088	2.01572e-21	0.0131703	0.0593864	0.00801996	0.00784723	0.129244	0.280111	0.207307	0.0998654	0.00502888	0.0205886	3.51368e-06	180366	Peat bog (X11)	0.0013	0.0007	0	0.0026	0	0	0.021	0	0.073	0.0013	0.3583	0.4997	0	0.0033	0.0388
180368	9.49593e-07	0.00983428	0.00116375	1.7417e-32	0.00537369	0.019806	0.00773385	0.00348986	0.0754548	0.300215	0.249095	0.139552	0.0102253	0.0430982	1.13024e-06	180368	Peat bog (X11)	0.0079	0.0342	0.0026	0.0013	0	0.002	0.0342	0.0013	0.0473	0.0283	0.1335	0.6095	0.0473	0	0.0506
180369	1.12573e-07	0.00787908	0.0029652	1.04731e-28	0.00964812	0.0244022	0.00964618	0.0151189	0.117073	0.204969	0.253705	0.206979	0.00711218	0.0250431	1.23787e-06	180369	Peat bog (X11)	0	0.0085	0.0007	0.0013	0	0	0.025	0	0.0552	0.0092	0.1598	0.6049	0.0013	0.0026	0.1315
181176	0.011522	0.000700705	0.00301775	1.79245e-38	0.0405473	0.0661926	0.00253058	7.31472e-05	0.381744	0.142877	0.0750153	0.0202978	0.0123852	0.0258828	1.4517e-05	181176	Willow wetland (X8)	0.0013	0.0171	0	0.0099	0.0204	0.0408	0	0	0.8646	0.0316	0	0.0013	0.0125	0.0007	0
181178	0.0188514	0.00277802	0.0146643	8.69208e-12	0.282595	0.0242887	0.000330792	3.70048e-05	0.118324	0.0142925	0.0157192	0.00300162	0.017131	0.034676	0.00956399	181178	Sparse birch forest (X4)	0	0.0026	0.0256	0.0092	0.5549	0.1006	0.0007	0	0.096	0.0224	0.0197	0.0342	0	0.0487	0.0855
181182	5.50187e-12	0.660772	2.63158e-05	1.75822e-21	0.0436667	0.030422	0.000261023	9.11725e-07	0.0126563	0.00791282	3.55115e-07	0.000478903	0.00376014	0.013976	2.02213e-05	181182	Water bodies (X1)	0	0.7104	0	0.0073	0.1342	0.0161	0	0	0.0433	0.0271	0	0	0	0.0425	0.0191
181185	1.14056e-25	0.619123	1.08292e-08	4.51357e-36	0.0351209	0.00104258	9.71942e-05	6.60862e-09	0.0429923	0.00536675	3.24236e-09	0.000610069	0.00455726	0.0504239	9.08002e-08	181185	Water bodies (X1)	0	0.9859	0	0.0115	0.0026	0	0	0	0	0	0	0	0	0	0
181186	1.59456e-25	0.579609	1.42938e-08	2.53022e-38	0.0200726	0.00366009	0.000312968	1.66781e-08	0.0522223	0.023647	2.97452e-09	0.00124285	0.00380737	0.0605342	3.84383e-08	181186	Water bodies (X1)	0.0018	0.8333	0	0.0798	0.0228	0.0114	0.0018	0	0.0096	0.0132	0.0175	0.0035	0	0.0035	0.0018
181187	0.0577469	0.0149015	0.0173001	1.20206e-08	0.0752104	0.384561	0.00138757	6.27193e-05	0.0751635	0.0220059	0.0661461	0.00405551	0.00659617	0.0192028	0.0148561	181187	Sparse birch forest (X4)	0.0099	0.1381	0	0.0592	0.2577	0.0644	0	0	0.0309	0.1637	0.0079	0.0059	0.0072	0.1677	0.0874
181190	3.8264e-05	0.00147651	0.00342893	8.10954e-28	0.0278768	0.107367	0.0059886	0.000739051	0.238295	0.160508	0.394138	0.0638958	0.0111917	0.040335	6.57089e-05	181190	Sedge wetland (X10)	0.0184	0.0309	0.0026	0.0066	0	0.0112	0.023	0	0.0355	0.0585	0.5201	0.2341	0.0013	0.0033	0.0546
181195	0.0016873	0.00283466	0.00310356	6.67337e-33	0.0116212	0.0188668	0.00606721	0.00136594	0.0838405	0.255993	0.154765	0.165185	0.0208419	0.0634797	1.45503e-05	181195	Peat bog (X11)	0.0105	0.0348	0.0283	0.0079	0	0.0085	0.0394	0.0072	0.1151	0.046	0.0178	0.5707	0.0138	0.0289	0.071
181205	1.74111e-23	0.617032	4.33924e-08	5.61755e-28	0.0203694	0.000237614	0.000133869	4.76638e-08	0.0342195	0.0126661	2.73945e-08	0.00419544	0.00824136	0.102023	3.63993e-07	181205	Dwarf shrub (X13)	0	0	0	0	0	0	0	0	0	0	0	0	0	1	0
181206	6.88951e-24	0.635615	3.00481e-08	9.50197e-30	0.0246081	0.000329373	0.000119249	2.54891e-08	0.0299732	0.00842077	1.10262e-08	0.00283313	0.00782331	0.0897575	3.87549e-07	181206	Water bodies (X1)	0	1	0	0	0	0	0	0	0	0	0	0	0	0	0
181998	8.22566e-12	0.130787	0.000131253	1.71072e-16	0.0343674	0.0268986	0.000705431	1.62789e-05	0.232154	0.0906168	0.000425219	0.00222914	0.00298537	0.0203008	8.31823e-06	181998	Water bodies (X1)	0	0.4806	0.0007	0.0112	0.0874	0.0283	0	0	0.384	0	0.0013	0	0	0.0066	0
182003	0.00201726	0.00171107	0.00437539	6.67925e-31	0.0419632	0.0760831	0.00281838	0.000201827	0.410545	0.153754	0.095713	0.0221617	0.00931401	0.0225435	3.3264e-05	182003	Willow wetland (X8)	0	0.0151	0	0.0105	0.0007	0.0105	0	0	0.9428	0.0197	0	0	0.0007	0	0
182006	0.0576078	0.000663035	0.182268	1.55997e-23	0.310009	0.0492973	0.000915335	0.000460874	0.0116169	0.00269867	0.000646514	0.0112376	0.0085693	0.00799513	4.90515e-05	182006	Exposed rock (X2)	0.0026	0.0256	0.5108	0.0059	0.048	0.2998	0	0	0.0723	0.0013	0.0151	0.002	0	0.0072	0.0092
182017	1.72744e-05	0.00393094	0.0057881	4.64529e-22	0.0352434	0.0472073	0.00987931	0.00932668	0.0930395	0.0990499	0.129937	0.32389	0.0203903	0.0554806	0.000620287	182017	Peat bog (X11)	0.0013	0.0085	0	0.0013	0	0.0007	0.0224	0.0007	0.0007	0.1631	0.0362	0.6759	0.0191	0.0237	0.0467
182022	2.02342e-06	0.000741428	0.00263527	1.51612e-33	0.0487526	0.120005	0.0119559	0.00184302	0.301772	0.0944673	0.0766992	0.250898	0.0148281	0.0352913	9.27305e-05	182022	Willow wetland (X8)	0.0039	0.0217	0.0342	0.0033	0	0.0059	0.0059	0.002	0.3655	0	0	0.3156	0.0013	0.2406	0
182025	5.10881e-05	0.00186717	0.00456233	6.12571e-37	0.0101141	0.0455862	0.0131447	0.00481918	0.0946726	0.252839	0.128836	0.250817	0.0111985	0.0335143	1.33152e-06	182025	Peat bog (X11)	0.0039	0.0145	0.002	0.002	0	0.0007	0.0736	0.0033	0.0039	0.0178	0.0151	0.6943	0.0644	0.025	0.0796
182026	1.89864e-05	0.00295601	0.001063	1.70775e-41	0.00805171	0.0185524	0.00815551	0.00168026	0.11428	0.27752	0.0915014	0.186198	0.0155051	0.0432675	9.64974e-07	182026	Peat bog (X11)	0.0007	0.0118	0	0.0105	0	0	0.0191	0	0.0039	0.0454	0.0092	0.7278	0.0125	0.0467	0.1124
182027	0.00308881	0.0213989	0.00486555	3.00004e-31	0.00260611	0.00835006	0.0044944	0.00325756	0.0451079	0.604389	0.197016	0.0528192	0.00779904	0.0356278	1.07336e-07	182027	Peat bog (X11)	0.0053	0.0072	0	0	0	0	0.0105	0	0	0.2991	0.0151	0.5365	0.0533	0.0368	0.0362
182829	0.0123208	0.00152834	0.00530874	2.61638e-28	0.061248	0.103746	0.00275184	0.000201136	0.422199	0.094369	0.150362	0.0265498	0.0125126	0.0251152	0.000367465	182829	Willow wetland (X8)	0	0	0	0	0.002	0.0033	0	0	0.9901	0.0007	0	0	0.0039	0	0
182831	0.0392326	0.00135301	0.0157682	2.50645e-39	0.0316221	0.0527453	0.00490471	0.00134565	0.225726	0.174322	0.0167955	0.0514477	0.00794387	0.0119414	1.10774e-06	182831	Willow wetland (X8)	0	0.0158	0	0.0164	0	0.002	0	0	0.931	0.0296	0	0.0007	0.0033	0.0013	0
182833	0.0371008	0.000753111	0.117775	1.68597e-09	0.309486	0.190358	0.00119166	0.000218042	0.0734932	0.0113519	0.0360626	0.00747947	0.00916604	0.0209149	0.0061755	182833	Forested wetland (X5)	0.0164	0.0296	0.0605	0.0618	0.0256	0.5595	0.0007	0	0.0894	0.0085	0.1354	0.002	0	0.0033	0.0072
182836	0.0427871	0.00299269	0.0333252	4.60489e-12	0.186328	0.0183268	0.000647987	0.00022064	0.100748	0.0353708	0.0165448	0.00868525	0.0152733	0.0341534	0.00187385	182836	Willow wetland (X8)	0.0145	0.0092	0.0224	0.0059	0.073	0.0138	0.0046	0.0007	0.3951	0.2321	0.0164	0.0066	0.0079	0.1723	0.0256
182837	0.00269244	0.00785629	0.00213137	4.58758e-28	0.00939384	0.0442007	0.00355446	0.000415373	0.125287	0.29826	0.430496	0.0300893	0.0124165	0.0489363	2.67576e-05	182837	Sphagnum wetland (X9)	0.0013	0.0112	0	0.002	0.0302	0.0026	0	0	0.3287	0.5095	0	0.0007	0.0388	0.075	0
182839	0.00401081	0.000466076	0.00133956	1.20072e-29	0.0297495	0.0116985	0.00195099	2.0196e-05	0.137144	0.144171	0.129191	0.0880402	0.042793	0.168787	0.000353106	182839	Sphagnum wetland (X9)	0	0.0072	0	0.0329	0.1348	0.0335	0.0007	0	0.0756	0.2091	0.0868	0.1677	0	0.0638	0.188
182850	8.38948e-06	0.00041034	0.00442947	5.92715e-39	0.0397352	0.0727108	0.0191602	0.00472315	0.190078	0.104699	0.0280338	0.537965	0.0191217	0.037633	2.18488e-05	182850	Peat bog (X11)	0	0.025	0.0131	0.0033	0	0.002	0.0007	0.0092	0.0927	0	0	0.7114	0.0296	0.1131	0
182851	2.0211e-07	0.00320459	0.00141561	3.73411e-34	0.0148622	0.0175193	0.0130126	0.0123725	0.0618826	0.114291	0.107309	0.50123	0.0217209	0.0562614	1.33602e-05	182851	Peat bog (X11)	0.002	0.0276	0.0007	0.0039	0	0	0.0053	0.0092	0.0368	0.0079	0	0.7331	0.0723	0.0901	0.0112
182854	0.000216133	0.00271332	0.000328354	1.86796e-67	0.00108727	0.0025376	0.00673554	0.00136155	0.0202069	0.554428	0.0447674	0.105131	0.0158204	0.0348688	1.11107e-10	182854	Peat bog (X11)	0	0.002	0	0.0013	0	0	0.0118	0	0	0.2663	0.002	0.5871	0.0552	0.0421	0.0322
182858	4.80926e-30	0.600008	9.24777e-10	2.31707e-41	0.0133587	0.000260342	0.000138333	3.07116e-09	0.068903	0.0254164	1.41147e-09	0.00156263	0.00492646	0.120914	3.12409e-09	182858	Water bodies (X1)	0.0011	0.9678	0	0	0	0.0064	0	0	0	0.0032	0.0064	0.014	0	0.0011	0
183653	7.25629e-05	0.0113053	0.00213903	3.65152e-23	0.0438842	0.5885	0.00181146	4.27395e-05	0.144496	0.0388314	0.182642	0.00119914	0.00390663	0.0123903	0.000265022	183653	Forested wetland (X5)	0.0013	0.0072	0	0	0.0046	0.4997	0	0	0.4767	0.002	0.0085	0	0	0	0
183657	0.00426115	0.000582966	0.00128329	1.40979e-44	0.0160725	0.0183828	0.00364613	0.000125482	0.303096	0.301839	0.121325	0.0665268	0.0199712	0.0503733	2.16078e-06	183657	Willow wetland (X8)	0.0007	0.0473	0	0.0131	0.0105	0.0105	0	0	0.8277	0.0605	0.0007	0.0072	0.0171	0.0046	0
183658	0.00162742	0.00174861	0.00355029	2.42246e-36	0.0199185	0.0346577	0.00511021	0.000769446	0.253063	0.233695	0.0937013	0.0839832	0.0130308	0.0307754	6.36737e-06	183658	Willow wetland (X8)	0.0007	0.0039	0	0.002	0.0066	0.0013	0	0	0.9658	0.0112	0	0	0.0039	0.0046	0
183659	1.19647e-05	0.00360847	0.00847485	6.09008e-28	0.024187	0.020793	0.00416528	0.00326227	0.339233	0.23593	0.0799919	0.0661342	0.00541065	0.015456	1.0141e-06	183659	Willow wetland (X8)	0	0.0178	0	0.0066	0.0171	0.0013	0	0	0.9093	0.0039	0	0	0	0.044	0
183664	0.0151727	0.000473633	0.00990079	1.37777e-31	0.108882	0.00346628	0.00105513	0.000246386	0.0972137	0.0624463	0.00933854	0.0468619	0.0321857	0.0556142	3.50827e-05	183664	Sphagnum wetland (X9)	0.0243	0.0092	0.048	0.0125	0.0999	0.0158	0.0046	0.0033	0.0947	0.3596	0.0085	0.0079	0.0842	0.2058	0.0217
183667	0.00048399	0.000813289	0.00423501	7.36093e-30	0.0667713	0.0150043	0.00491197	0.00208697	0.109928	0.0886039	0.0700928	0.250697	0.0445166	0.0896702	0.00062195	183667	Peat bog (X11)	0.0007	0.0138	0	0.0046	0	0	0.0131	0	0.0007	0.0723	0.0322	0.7022	0.0224	0.021	0.117
183677	0.000480343	0.00021774	0.0144202	9.47925e-46	0.0258219	0.0405339	0.0197734	0.00940888	0.068708	0.148685	0.017866	0.513597	0.0175206	0.0304314	6.14247e-07	183677	Peat bog (X11)	0.0007	0.0131	0.0007	0.0026	0	0.0033	0.0007	0.0039	0.0421	0.0289	0	0.8705	0.0026	0.025	0.0059
183681	5.7424e-06	0.0123348	0.000165797	1.12892e-79	0.000151772	0.00315165	0.019766	0.0197941	0.00109245	0.576872	0.0558629	0.171586	0.010861	0.0229603	5.23938e-13	183681	Peat bog (X11)	0	0	0	0	0	0	0.0059	0	0	0.3853	0.0007	0.5569	0.0421	0	0.0092
183682	0.000204436	0.00209921	0.000505908	1.37855e-58	0.00209921	0.00521333	0.00768816	0.00119148	0.0336206	0.453808	0.0710335	0.15664	0.0184378	0.0458784	3.90728e-09	183682	Peat bog (X11)	0.0007	0.0237	0	0.0151	0	0	0.0033	0	0.0013	0.1538	0.0013	0.5917	0.0763	0.0881	0.0447
184485	0.00907621	0.00231405	0.00310002	1.03728e-20	0.0399464	0.0179379	0.00178666	0.00015486	0.122207	0.13591	0.2746	0.0432774	0.0327757	0.115335	0.00199043	184485	Willow wetland (X8)	0.0401	0.0546	0	0.0283	0.0171	0.0618	0	0	0.3708	0.2183	0.167	0.0296	0.0046	0.0079	0
184486	0.00059883	0.00266333	0.00180326	5.51262e-36	0.00978946	0.020662	0.00538531	0.000802136	0.140117	0.28302	0.236982	0.113072	0.0168353	0.0517287	5.42303e-06	184486	Willow wetland (X8)	0	0.002	0	0.0007	0.025	0.0112	0.0007	0	0.8994	0.0447	0	0	0.0118	0.0046	0
184493	0.00148632	0.000143453	0.000399974	2.94679e-55	0.0108126	0.00292277	0.00236367	2.14771e-05	0.14772	0.290049	0.0531637	0.101546	0.039491	0.108117	1.58205e-07	184493	Sphagnum wetland (X9)	0	0.0026	0	0.023	0.0651	0.0007	0	0	0.0013	0.5141	0.0026	0.0947	0.0302	0.2321	0.0335
184499	0.000417881	0.00273397	0.00566482	1.01734e-46	0.00607252	0.0232655	0.0158826	0.0156436	0.0627768	0.350216	0.0356209	0.283903	0.0100993	0.0198898	4.42824e-08	184499	Peat bog (X11)	0.0322	0.046	0	0.0066	0	0	0.0454	0	0	0.2538	0.0184	0.3741	0.0085	0.1019	0.1131
184503	5.44401e-05	0.000380443	0.0103685	1.7689e-57	0.00842536	0.0473004	0.0350202	0.0423921	0.0613094	0.271436	0.0226228	0.476122	0.00820234	0.0121756	2.76091e-09	184503	Peat bog (X11)	0.0039	0.044	0	0.0059	0	0	0.0427	0	0.0066	0.0546	0	0.7193	0.0191	0.0769	0.027
184504	1.32217e-05	0.000591538	0.00131028	2.29209e-65	0.00415271	0.0211002	0.0364092	0.0168511	0.0242559	0.215808	0.0131117	0.66605	0.0187437	0.0258515	4.06153e-09	184504	Peat bog (X11)	0.0007	0.0105	0.0007	0.002	0	0.0007	0.027	0.0007	0.0046	0.2821	0	0.5779	0.0243	0.0506	0.0184
184513	1.14103e-10	0.0883495	0.000267825	2.70654e-18	0.0103892	0.0012953	0.000876939	0.000295306	0.259586	0.328214	0.0122776	0.017412	0.00503018	0.0361674	4.29589e-07	184513	Sphagnum wetland (X9)	0.0007	0.021	0	0.0335	0.0217	0.1736	0	0	0.0007	0.4753	0.044	0.0631	0.0007	0.0289	0.1368
184514	2.68522e-07	0.138392	0.00123257	4.28457e-13	0.0102538	0.00138146	0.000773703	0.000686782	0.17694	0.32438	0.0305391	0.0160959	0.00600946	0.033062	2.67678e-06	184514	Sphagnum wetland (X9)	0.0013	0.0717	0	0.0099	0.0053	0.0736	0	0	0.0013	0.7206	0.0394	0.0362	0	0.0072	0.0335
184515	1.15694e-06	0.527629	0.000861754	3.31526e-08	0.0293652	7.41014e-05	0.000206831	0.000426994	0.0210591	0.182567	4.15054e-05	0.0124349	0.0210822	0.0783531	2.87488e-05	184515	Water bodies (X1)	0.0099	0.5707	0	0.0033	0	0.048	0.0013	0	0.0046	0.2505	0.0302	0.0414	0.0007	0.0085	0.0309
185314	0.000589102	0.000425114	0.000985784	2.72616e-48	0.00669063	0.0165503	0.00537966	0.000136358	0.114497	0.351758	0.193497	0.101918	0.0189667	0.0675721	2.08233e-07	185314	Willow wetland (X8)	0.0059	0.0039	0	0	0.0736	0	0	0	0.6068	0.2045	0	0.0007	0.0204	0.0842	0
185315	0.00153956	0.00868973	0.00934427	7.4311e-14	0.0273284	0.117387	0.00500133	0.00116117	0.0931937	0.130571	0.261757	0.0640052	0.0125306	0.0512182	0.00196601	185315	Sphagnum wetland (X9)	0.0099	0.0191	0	0.0171	0.0611	0.0131	0.0026	0	0.1354	0.3754	0.0546	0.0881	0.1229	0.092	0.0085
185316	0.00223144	0.00644739	0.00638945	1.2646e-18	0.0250018	0.126984	0.00413584	0.000690901	0.142732	0.142468	0.422609	0.0351767	0.0110459	0.0409265	0.000674637	185316	Sparse birch forest (X4)	0.0013	0.0039	0	0.0237	0.2893	0.0072	0	0	0.0934	0.2788	0.0092	0	0.0046	0.2814	0.0072
185323	1.17684e-06	0.00267512	0.00119257	3.03552e-38	0.0116033	0.033867	0.0123083	0.0036432	0.113372	0.185919	0.0940268	0.303016	0.0152631	0.0426119	3.82934e-06	185323	Sphagnum wetland (X9)	0	0.0039	0	0.002	0	0	0.002	0	0	0.4635	0.0072	0.1631	0.0454	0.2867	0.0263
185332	0.000211799	0.000688466	0.00638384	3.92382e-64	0.00575123	0.037884	0.0453025	0.0714355	0.0323242	0.254235	0.00782962	0.60092	0.0111365	0.0115566	1.6807e-09	185332	Peat bog (X11)	0.0033	0.0178	0.0007	0.0046	0	0	0.1275	0.002	0.0033	0.0828	0	0.6239	0.0191	0.075	0.0401
185338	1.39461e-05	0.00181699	0.00045067	6.3005e-68	0.00113633	0.00598874	0.0144285	0.00466971	0.0147174	0.45327	0.0543647	0.228825	0.0135814	0.0295483	1.04892e-10	185338	Sphagnum wetland (X9)	0	0.0026	0	0.0013	0	0	0	0	0	0.6509	0.0013	0.2406	0.0526	0.0342	0.0164
185339	0.00283698	0.00233375	0.00149378	9.18279e-53	0.00337654	0.00604615	0.0044277	0.000732502	0.0618827	0.489794	0.0572506	0.0571055	0.0117903	0.0301631	4.56741e-09	185339	Sphagnum wetland (X9)	0.0007	0.1433	0	0.0033	0.002	0.0434	0.0026	0	0.0039	0.3833	0.0217	0.1861	0.0007	0.0736	0.1354
185340	0.0123062	0.175421	0.00564166	3.90871e-17	0.00456262	0.00459117	0.00148615	0.00189688	0.0488021	0.476908	0.0687477	0.0156257	0.00722725	0.0308896	2.96791e-06	185340	Water bodies (X1)	0.0013	0.3498	0	0.0224	0.0007	0.0053	0	0	0.0007	0.2899	0.0237	0.1164	0.0217	0.0868	0.0815
185342	0.0247421	0.0828704	0.00495181	1.37837e-22	0.00350253	0.00442333	0.00114868	0.00070119	0.0495319	0.536835	0.150789	0.00730225	0.00616604	0.0294767	3.53246e-07	185342	Sphagnum wetland (X9)	0.0033	0.1072	0	0.0099	0.0007	0.0131	0.0007	0	0	0.5904	0.0638	0.1045	0.048	0.0099	0.0487
186139	0.000148345	0.00410095	0.00880231	9.93584e-19	0.0426817	0.198563	0.00466357	0.000772549	0.279797	0.109527	0.226757	0.0339513	0.00679479	0.0229758	0.0003379	186139	Willow wetland (X8)	0.0013	0.1499	0	0.0059	0.0388	0.0664	0	0	0.6601	0.0487	0.0033	0.0046	0.0204	0.0007	0
186150	0.000373228	0.00525878	0.0024624	6.0345e-45	0.00366974	0.0097919	0.00631143	0.00348332	0.0708161	0.487642	0.110792	0.0794931	0.0088724	0.0250977	1.57769e-08	186150	Sphagnum wetland (X9)	0.0099	0.0329	0	0.0046	0	0.0007	0.0112	0	0	0.6226	0.0184	0.0934	0.0454	0.1433	0.0178
186155	0.000913098	0.00171506	0.00331316	3.56979e-43	0.00789623	0.0255377	0.00887489	0.00246583	0.0896489	0.312665	0.126116	0.151387	0.0132688	0.0333262	3.57607e-07	186155	Sphagnum wetland (X9)	0.0145	0.0007	0	0.0013	0	0.0118	0.0059	0	0.0013	0.4819	0.0533	0.1223	0	0.2281	0.0789
186159	2.46557e-05	0.00100359	0.00740424	1.48078e-47	0.00927422	0.0372006	0.0211024	0.0196633	0.097965	0.28769	0.0371114	0.35742	0.00800042	0.0160763	2.66793e-08	186159	Peat bog (X11)	0.0039	0.0158	0	0.0026	0	0.0033	0.0381	0	0.0263	0.1302	0.0085	0.6391	0.0112	0.0467	0.0743
186170	0.071857	0.0486751	0.0011967	3.83868e-21	0.0144033	0.00252124	0.000561053	4.68316e-05	0.0875648	0.179033	0.0186418	0.0144046	0.0230764	0.067621	0.000178422	186170	Sphagnum wetland (X9)	0.0033	0.1098	0	0.0026	0.0033	0.0138	0	0	0	0.6121	0.0822	0.0539	0.0296	0.0178	0.0717
186171	0.000358764	0.00565606	0.000113518	2.35357e-57	0.0013333	0.000756494	0.00330572	0.000258036	0.025792	0.523573	0.046373	0.14556	0.0373606	0.104628	1.05641e-08	186171	Sphagnum wetland (X9)	0.0099	0.0559	0	0	0.0053	0.0302	0.0013	0	0	0.7232	0.0513	0.0401	0.0256	0.0085	0.0487
186175	9.03523e-31	0.632107	6.81824e-10	2.07868e-43	0.00982024	0.000287749	0.000144614	3.41193e-09	0.0707817	0.0351403	2.22182e-09	0.00104825	0.00378255	0.107164	7.03454e-10	186175	Sedge wetland (X10)	0	0.1013	0	0	0	0.0103	0	0	0.0423	0.0731	0.7244	0.0474	0	0	0.0013
186968	0.000366815	0.000277425	0.00268022	8.82701e-41	0.0364427	0.0200171	0.00609937	0.00056314	0.130179	0.117941	0.0534712	0.241618	0.0320437	0.0695768	1.83933e-05	186968	Sphagnum wetland (X9)	0.0053	0.0105	0	0.0007	0.0434	0	0.0026	0	0.2419	0.4826	0.002	0.0092	0.167	0.0348	0
186979	1.13616e-08	0.0157878	0.00126017	9.26931e-28	0.00841458	0.00640005	0.00493766	0.00642668	0.16151	0.275261	0.113091	0.136976	0.00689542	0.0285641	4.2201e-07	186979	Sphagnum wetland (X9)	0.0506	0.0565	0	0	0	0	0.0046	0	0	0.3636	0.1584	0.2492	0.0401	0.0736	0.0033
186980	0.00264597	0.00598806	0.00758181	1.48529e-34	0.0100145	0.0105601	0.0032921	0.00201614	0.180601	0.427712	0.0619344	0.0379433	0.00667972	0.0182835	1.35531e-07	186980	Sphagnum wetland (X9)	0.0355	0.0302	0	0	0	0.0007	0.0105	0	0.0013	0.4451	0.3018	0.0953	0.0105	0.0289	0.0401
186983	0.000264895	0.00452128	0.000969609	1.83799e-33	0.00844924	0.00948888	0.00201181	0.00012565	0.248451	0.457275	0.210245	0.0229732	0.0118112	0.0534876	1.3525e-06	186983	Sphagnum wetland (X9)	0.0105	0.0197	0	0.0007	0	0.0039	0.0079	0	0.0007	0.5503	0.1479	0.0565	0.0625	0.1105	0.0289
186989	0.000114523	0.00089498	0.0013012	1.33548e-46	0.0145198	0.014143	0.0112303	0.00216291	0.0947709	0.186215	0.0272268	0.44957	0.0317404	0.0597383	3.19065e-06	186989	Peat bog (X11)	0.0138	0.0059	0	0.0033	0.0007	0.0105	0.0204	0	0.0131	0.284	0.0099	0.4655	0.0039	0.0888	0.0802
186995	7.49553e-06	0.327472	0.00360748	5.92813e-06	0.00686895	0.0022109	0.00108751	0.00175944	0.0463846	0.294749	0.0213313	0.0249596	0.00607115	0.0364032	1.10731e-05	186995	Water bodies (X1)	0	0.4648	0	0.0025	0	0.0008	0	0	0.0008	0.2893	0.0115	0.127	0.0189	0.0574	0.027
186997	7.69351e-24	0.588967	6.99885e-08	3.27661e-30	0.0100867	0.000593535	0.000225807	2.23994e-07	0.0877876	0.0635407	6.07574e-07	0.00175274	0.00347837	0.0629308	1.33436e-08	186997	Water bodies (X1)	0	0.5455	0	0	0	0.303	0	0	0.0303	0	0.1212	0	0	0	0
186998	7.20522e-17	0.374004	5.96669e-06	2.44075e-16	0.0062305	0.000147561	0.000320821	2.17156e-05	0.175968	0.263433	0.00081524	0.0110098	0.00549668	0.0805483	1.13954e-07	186998	Sphagnum wetland (X9)	0.0021	0.2647	0	0	0.0924	0.0399	0	0	0.0126	0.4832	0.0756	0.0126	0.0021	0.0021	0.0126
186999	2.88756e-05	0.373016	0.00100905	1.80905e-17	0.00166852	0.00107726	0.00228285	0.0044934	0.0187249	0.544084	0.0640401	0.0821179	0.0126057	0.073581	2.15446e-06	186999	Sphagnum wetland (X9)	0.0107	0.1117	0	0.0032	0.0032	0.0473	0.0032	0	0	0.7723	0.0193	0.0097	0.0064	0.0032	0.0097
187005	1.50754e-33	0.656455	7.72121e-11	9.84652e-52	0.0141307	0.000653461	0.00014431	2.46698e-10	0.0578961	0.0197038	2.69487e-11	0.00059955	0.00381041	0.114626	4.54391e-10	187005	Willow wetland (X8)	0	0	0	0	0	0	0	0	1	0	0	0	0	0	0
187007	1.48013e-06	0.0266295	0.0110485	5.02229e-08	0.0392817	0.0728363	0.0029041	0.00185651	0.182367	0.0832988	0.0616184	0.0303397	0.00403129	0.0167503	0.000174263	187007	Forested wetland (X5)	0.0075	0.0374	0.0314	0.0015	0.018	0.3937	0.003	0	0.0778	0.0419	0.0434	0.1332	0.0434	0.0629	0.1048
187790	3.27466e-06	0.00579502	0.0510795	6.43583e-09	0.0615393	0.102584	0.00429536	0.00795477	0.105922	0.0644637	0.134062	0.0425684	0.00385939	0.0150509	6.74606e-05	187790	Water bodies (X1)	0.0344	0.15	0.0953	0.0281	0.0047	0.1016	0.0141	0	0.1125	0.1047	0.0797	0.1484	0.0531	0.0688	0.0047
187792	0.00117778	0.00175681	0.00729626	3.5135e-21	0.113466	0.430349	0.00294946	0.000102414	0.325482	0.0324298	0.101575	0.0128908	0.0083286	0.0192692	0.00374486	187792	Willow wetland (X8)	0.0039	0.0217	0	0.0072	0.1788	0.0552	0	0	0.572	0.0842	0.0342	0.0013	0.0039	0.0309	0.0066
187796	0.00285714	0.000184993	0.00236844	9.85777e-45	0.0292436	0.0232593	0.00416121	0.000154988	0.226438	0.186185	0.103229	0.0924627	0.0238219	0.0558539	3.61536e-06	187796	Sparse birch forest (X4)	0.0007	0.0033	0	0	0.3149	0	0	0	0.217	0.1486	0	0	0.0053	0.3103	0
187806	2.44228e-09	0.00513072	0.00171467	9.29622e-32	0.00980116	0.00845174	0.00485467	0.00499956	0.241871	0.28888	0.170542	0.089881	0.00441089	0.0193883	4.12085e-08	187806	Sphagnum wetland (X9)	0.0164	0.0986	0	0.0026	0	0	0.0007	0	0	0.4668	0.0703	0.0611	0.0342	0.2452	0.0039
187815	0.00401719	0.117248	0.00282895	1.04191e-19	0.00504378	0.00272218	0.00116199	0.000686643	0.0644608	0.471822	0.0461783	0.016209	0.00911846	0.0405769	2.58361e-06	187815	Water bodies (X1)	0.0033	0.5417	0	0.0206	0	0.019	0	0	0.0017	0.2989	0.0231	0.0066	0	0.0479	0.0372
187816	9.34325e-07	0.139583	0.00229528	1.70062e-10	0.0115839	0.0069768	0.00202247	0.00241684	0.11664	0.239902	0.0461462	0.0432571	0.00694939	0.0341947	3.74033e-05	187816	Water bodies (X1)	0	0.5646	0	0.0107	0.001	0.0146	0	0	0.001	0.2857	0.0408	0.0146	0	0.0243	0.0428
187819	0.000452188	0.0386743	0.0025275	5.53218e-36	0.0014041	0.00615054	0.00628376	0.00687745	0.0173264	0.5897	0.130424	0.0872175	0.00869425	0.0373873	2.78387e-08	187819	Sphagnum wetland (X9)	0	0	0	0	0.0013	0.0072	0	0	0	0.8757	0.021	0.0289	0.0131	0.0184	0.0342
187829	1.75509e-16	0.409336	1.42287e-05	1.9948e-16	0.00590357	0.00138031	0.000753291	0.000133598	0.144709	0.218796	0.00571266	0.00849888	0.00332745	0.042138	1.83935e-07	187829	Water bodies (X1)	0.002	0.39	0	0	0.0119	0.0776	0	0	0.008	0.3562	0.0527	0.0428	0	0.007	0.0517
187831	4.02327e-24	0.523632	5.42935e-08	2.22605e-30	0.00940738	0.000279326	0.000199867	1.72559e-07	0.109109	0.0815045	5.95418e-07	0.0024877	0.00415883	0.0826258	9.72945e-09	187831	Sphagnum wetland (X9)	0.0098	0.0028	0.0587	0	0.0042	0.0126	0.0014	0	0.0322	0.351	0.0462	0.2937	0.1804	0.0014	0.0056
187834	4.42665e-16	0.356551	2.56671e-05	6.98139e-15	0.0123079	0.0040971	0.000572857	6.97812e-05	0.152723	0.0963595	0.00329775	0.00323581	0.00238142	0.0239297	4.78273e-07	187834	Willow wetland (X8)	0	0.1611	0.0007	0.073	0.002	0.0664	0	0	0.2196	0.1749	0.0894	0.0684	0.0789	0.0118	0.0539
188623	1.004e-06	0.052605	0.00328268	1.1375e-11	0.0376539	0.169027	0.00380038	0.00160899	0.230872	0.0923274	0.0688472	0.0216433	0.00506366	0.0180594	0.000863271	188623	Willow wetland (X8)	0	0.2932	0	0.0125	0.2564	0.0138	0	0	0.3373	0.0178	0	0	0	0.069	0
188631	9.67171e-06	0.000247063	0.000403454	3.93619e-67	0.00274468	0.00565839	0.0117	0.000803679	0.0156854	0.291648	0.0472211	0.31757	0.0260491	0.065408	9.98546e-10	188631	Sphagnum wetland (X9)	0.0007	0.0046	0	0	0.0007	0	0.0046	0	0	0.551	0.0059	0.3603	0.0421	0.0171	0.0131
188632	0.0026832	0.000154074	0.000920761	1.70596e-61	0.00987559	0.00616956	0.00455196	0.000153254	0.162881	0.32749	0.035447	0.117043	0.0236177	0.0445241	1.44553e-08	188632	Sphagnum wetland (X9)	0.0125	0.0539	0	0.0053	0	0	0.0296	0.0007	0	0.4274	0.0368	0.3057	0.0493	0.0493	0.0296
188634	0.000594019	0.0065941	0.0127319	9.02863e-25	0.0130393	0.063439	0.00781202	0.00494942	0.128228	0.284607	0.171945	0.0937089	0.00693042	0.0241481	7.18008e-06	188634	Dwarf shrub (X13)	0.0164	0.071	0	0.0105	0	0.0013	0.002	0	0	0.3162	0.0611	0.0966	0.0342	0.378	0.0125
188637	0.0140207	0.00016281	0.000772491	5.03231e-53	0.0314642	0.00662024	0.00136564	1.16006e-05	0.327163	0.127643	0.0209176	0.0358528	0.0271746	0.0446262	8.01805e-07	188637	Sphagnum wetland (X9)	0.0013	0.002	0.0007	0.002	0	0.0026	0.0178	0	0.0138	0.4346	0.1683	0.2446	0.0013	0.0184	0.0927
188639	0.00184458	0.0393499	0.00124434	5.78925e-18	0.0177967	0.0188741	0.000901882	5.5387e-05	0.170084	0.197381	0.0799478	0.00676142	0.0115744	0.0472755	0.000255673	188639	Sedge wetland (X10)	0.0053	0.0421	0	0.0033	0.0007	0.0158	0	0	0	0.2367	0.3314	0.0007	0	0.0559	0.3083
188641	1.52154e-17	0.445783	4.202e-06	1.10712e-18	0.00879684	0.000686609	0.000308459	1.12437e-05	0.167637	0.156044	0.000438636	0.00301215	0.00347045	0.0451762	1.19346e-07	188641	Water bodies (X1)	0.0025	0.797	0	0.0013	0	0.085	0	0	0.0178	0.0013	0.0711	0.0025	0	0.0025	0.019
188648	2.13745e-05	0.0149533	0.000224298	7.72828e-72	0.000255514	0.00233965	0.0128068	0.0114717	0.0023755	0.59069	0.054508	0.146238	0.0121965	0.0279341	5.24725e-12	188648	Sphagnum wetland (X9)	0	0.0322	0	0.0059	0	0.0013	0	0	0	0.9382	0.0072	0.002	0.0046	0.0033	0.0053
188649	0.000648053	0.00780675	0.000751669	4.74477e-47	0.00272289	0.0048184	0.00528022	0.00145298	0.0392917	0.429003	0.081239	0.118063	0.0180474	0.048662	6.61839e-08	188649	Sphagnum wetland (X9)	0.0013	0.0079	0	0.0007	0.0007	0.0118	0	0	0	0.6667	0.0355	0.0565	0.021	0.0861	0.1118
188660	2.60614e-07	0.285471	0.00126236	1.42478e-07	0.0145444	0.0064477	0.00151213	0.00100812	0.106003	0.202908	0.00670248	0.0316805	0.00741599	0.0378757	0.000124232	188660	Sphagnum wetland (X9)	0.0224	0.0302	0	0.0007	0.0053	0.0717	0.0072	0	0.0112	0.428	0.1506	0.2558	0.0099	0	0.0072
188661	2.60142e-06	0.122753	0.00135795	4.38205e-14	0.00793834	0.0149271	0.00402898	0.00335007	0.0850531	0.275623	0.103627	0.0885893	0.0107529	0.0523106	0.000133169	188661	Sphagnum wetland (X9)	0.0053	0.0224	0	0	0.0026	0.0283	0.0007	0	0	0.8356	0.0539	0.0388	0.0066	0.0039	0.002
189449	0.00312945	0.00373494	0.00545947	2.77924e-20	0.0640855	0.345682	0.00258925	0.000110663	0.17911	0.0454989	0.205768	0.00945033	0.00943835	0.0260925	0.00293343	189449	Forested wetland (X5)	0	0.0204	0	0.0099	0.0026	0.4747	0	0	0.4471	0.0007	0.044	0	0	0	0.0007
189454	2.93204e-06	0.000824204	0.00811831	1.24592e-40	0.0247224	0.031051	0.0182066	0.0312414	0.086049	0.136235	0.0332855	0.464736	0.0129345	0.0239622	7.09751e-07	189454	Peat bog (X11)	0.0033	0.0302	0.0007	0	0	0	0.0118	0	0	0.1157	0.0888	0.618	0.0565	0.0046	0.0703
189458	0.000119701	0.000162487	0.00349612	9.04366e-58	0.0103341	0.0129587	0.0136229	0.0032503	0.0403508	0.23673	0.0255811	0.349783	0.0195554	0.0383302	1.06395e-08	189458	Peat bog (X11)	0.0322	0.0138	0.0066	0.0092	0	0.0059	0.0099	0	0.0092	0.3116	0.023	0.4721	0.0256	0.0368	0.044
189461	1.64345e-05	0.00503699	0.00369051	2.12318e-32	0.0123309	0.0188392	0.00735262	0.00499547	0.176393	0.282151	0.0807913	0.169294	0.00955619	0.02748	1.57133e-06	189461	Sphagnum wetland (X9)	0.0171	0.0388	0	0.0033	0	0.0007	0.0013	0	0.0013	0.5588	0.0217	0.05	0.0894	0.215	0.0026
189468	1.5655e-21	0.52172	2.46919e-07	1.31358e-28	0.00464518	0.00040718	0.000292412	7.92714e-07	0.115278	0.254066	8.97592e-06	0.00209932	0.00319733	0.0744561	3.35259e-09	189468	Water bodies (X1)	0	0.965	0	0.0023	0	0.021	0	0	0.0023	0	0	0.007	0	0.0012	0.0012
189487	5.5783e-22	0.372551	3.08359e-07	2.38254e-27	0.0169611	0.00206095	0.000443555	6.39629e-07	0.134585	0.0618425	1.3029e-06	0.00393992	0.00383143	0.0571715	1.3167e-07	189487	Water bodies (X1)	0.0067	0.3092	0	0.178	0.0501	0.0701	0.0011	0	0.1935	0.1224	0.0234	0.0211	0.0178	0.0022	0.0044
190279	0.00031524	0.00283732	0.00523784	1.39055e-19	0.0553382	0.355284	0.00215434	5.47213e-05	0.277388	0.0687673	0.262059	0.00507121	0.00555829	0.0215674	0.000457825	190279	Willow wetland (X8)	0.0007	0.0164	0	0.0013	0.0033	0.1446	0	0	0.8323	0.0013	0	0	0	0	0
190280	0.00199287	0.000509002	0.00470586	4.83893e-28	0.0720196	0.0242387	0.00266588	0.000304167	0.135492	0.0769249	0.152835	0.0776971	0.0327503	0.0824411	0.000569263	190280	Willow wetland (X8)	0.002	0.021	0	0.0026	0.0053	0.1414	0	0	0.499	0.2696	0.0013	0.0079	0.0467	0.0033	0
190292	2.24078e-05	0.000672228	0.00281043	2.31164e-43	0.0150978	0.0205188	0.0149677	0.00540467	0.0798158	0.172925	0.0503427	0.507847	0.0226257	0.0496789	1.76172e-06	190292	Sphagnum wetland (X9)	0	0.0217	0	0.0046	0	0	0.002	0	0	0.382	0.0237	0.3511	0.0763	0.0776	0.0611
190304	3.00237e-17	0.467796	5.27231e-06	1.20604e-17	0.0190366	0.0021174	0.000468546	7.55021e-06	0.0689651	0.0400329	1.61014e-05	0.00733034	0.00502576	0.0448519	2.91206e-06	190304	Sphagnum wetland (X9)	0	0.1678	0	0.001	0.0096	0.1074	0	0	0.001	0.2991	0.0173	0.0058	0.14	0.0901	0.1611
190306	0.00142031	0.0887055	0.00452217	2.4808e-06	0.159595	0.000242613	0.000119747	8.87218e-05	0.0935093	0.0531741	0.000100214	0.00692437	0.0255615	0.0529371	0.001287	190306	Forested wetland (X5)	0.0316	0.0026	0.002	0.0013	0.0355	0.2209	0.0039	0	0.0191	0.2005	0.0513	0.0717	0.0533	0.0966	0.2097
191117	1.58813e-05	0.125353	0.00186939	1.08146e-14	0.00724886	0.0186793	0.00237195	0.00166108	0.100501	0.326508	0.21963	0.0198373	0.00676611	0.0351548	2.95722e-05	191117	Sphagnum wetland (X9)	0.023	0.1039	0	0.0059	0	0.0046	0.0013	0	0.0131	0.4458	0.2774	0.0217	0.0158	0.0638	0.0237
191118	0.00202028	0.000759865	0.000591376	9.90048e-59	0.00443388	0.00313019	0.0035941	0.000211125	0.120658	0.485426	0.0481421	0.0786035	0.019742	0.0456102	5.67882e-09	191118	Sphagnum wetland (X9)	0.0059	0.0039	0	0	0	0	0	0	0.0007	0.8225	0.1164	0.0204	0.0026	0.0184	0.0092
191123	3.41453e-08	0.303364	0.000470855	3.03415e-14	0.00460188	0.00148757	0.000406646	0.00018688	0.102371	0.404569	0.0741788	0.00210828	0.00343542	0.0285482	2.18062e-07	191123	Sphagnum wetland (X9)	0	0.2831	0	0.0134	0	0.0007	0	0	0	0.5527	0.0205	0.0106	0.0042	0.0977	0.017
191124	2.54679e-30	0.670668	8.21934e-10	4.68338e-45	0.00972385	0.000827839	0.000219688	4.04822e-09	0.0673924	0.0449183	1.11235e-09	0.000884589	0.00322944	0.0902226	7.76143e-10	191124	Water bodies (X1)	0	0.6974	0	0.1579	0	0	0	0	0	0	0	0	0	0.1447	0
191133	1.69898e-16	0.36472	1.0743e-05	2.26905e-14	0.0113448	0.0004442	0.000409396	2.5279e-05	0.131816	0.12007	0.000282236	0.0129558	0.00536835	0.0608423	7.72358e-07	191133	Sphagnum wetland (X9)	0.0022	0.1264	0	0	0.0022	0.0244	0	0	0.0443	0.5166	0.0089	0.0089	0.2483	0.0177	0
191930	0.0153019	0.000882745	0.0766787	1.10281e-10	0.39963	0.416523	0.00169047	0.000165993	0.239344	0.00972799	0.0172759	0.00919186	0.00764967	0.0135743	0.0268361	191930	Forested wetland (X5)	0.0083	0.0759	0.2414	0.0065	0.0046	0.3506	0.0111	0.0009	0.1748	0.0278	0.0564	0.0231	0.0139	0.0009	0.0037
191933	0.0026416	0.00883081	0.00499171	2.8187e-17	0.11613	0.52133	0.00118882	2.11825e-05	0.200261	0.0174487	0.0347646	0.001725	0.00565633	0.0128033	0.00633551	191933	Forested wetland (X5)	0.0007	0.0381	0.0013	0.0296	0.0099	0.6279	0	0	0.2229	0.0046	0.0625	0	0	0.0007	0.002
191941	0.0121055	0.0017829	0.00279919	1.09954e-35	0.0125667	0.0276687	0.00309814	0.000178005	0.184719	0.307934	0.202755	0.0343356	0.0132973	0.0434111	3.9184e-06	191941	Sphagnum wetland (X9)	0.0105	0.1295	0.0007	0	0	0.0039	0.0033	0	0.0164	0.6062	0.025	0.0874	0.0026	0.1085	0.0059
191947	5.60162e-05	0.000269209	0.00280976	2.10062e-47	0.0244236	0.022487	0.0127249	0.002893	0.125273	0.140341	0.0395488	0.447842	0.0253245	0.045069	1.75056e-06	191947	Peat bog (X11)	0.0066	0.0066	0.0007	0.0013	0	0.0079	0.021	0	0.0066	0.0585	0.2584	0.5536	0.0007	0.0026	0.0756
191952	6.5061e-24	0.551923	8.78765e-08	5.18498e-29	0.0104862	0.000616863	0.000249768	3.71104e-07	0.106105	0.0644303	1.33573e-06	0.00212751	0.00336192	0.0607092	1.60007e-08	191952	Water bodies (X1)	0.0013	0.6591	0	0.0429	0	0.0051	0	0	0	0.0543	0.0366	0.0846	0	0.0543	0.0619
191973	6.57943e-05	0.00164987	0.0472492	9.97505e-08	0.250738	0.286008	0.0035354	0.000957989	0.197551	0.0278771	0.0242023	0.0324991	0.00793257	0.0237026	0.0106156	191973	Dwarf shrub (X13)	0.0026	0.0579	0.0085	0.0197	0.1433	0.0204	0.0013	0.002	0.0434	0.0046	0	0.2426	0	0.4536	0
191974	0.00251912	0.00106939	0.0862153	1.35459e-06	0.362893	0.303175	0.00270992	0.000486899	0.138567	0.013521	0.0102566	0.0317605	0.0107343	0.0250546	0.0522851	191974	Dwarf shrub (X13)	0.0059	0.0329	0.0066	0.0138	0.1026	0.0796	0.0007	0	0.0487	0.0526	0.0046	0.2768	0	0.3662	0.0092
192766	0.000393525	0.00014996	0.0118241	2.20666e-39	0.0597607	0.0360022	0.0113588	0.00286352	0.128566	0.0927795	0.02106	0.436856	0.0245506	0.0444331	1.41215e-05	192766	Peat bog (X11)	0.0342	0.0237	0.0033	0.002	0	0.0079	0.0401	0.0013	0.0408	0.1374	0.194	0.4944	0.0072	0.0099	0.0039
192770	0.00212169	0.0137184	0.0026422	5.18887e-27	0.0094945	0.0250866	0.00339918	0.000819119	0.134408	0.324579	0.220591	0.0384068	0.0114309	0.0402997	1.58257e-05	192770	Sphagnum wetland (X9)	0.0237	0.0414	0	0.0053	0.002	0.0007	0.0013	0	0.0296	0.4589	0.0723	0.0947	0.0828	0.1821	0.0053
192772	0.00300457	0.0401266	0.00400862	1.33965e-17	0.00833234	0.0318104	0.00317355	0.000842269	0.0903701	0.358403	0.178989	0.031409	0.00968722	0.0466864	6.80188e-05	192772	Sphagnum wetland (X9)	0.0204	0.1275	0	0.0145	0	0.0072	0.0066	0	0.0046	0.4037	0.2663	0.0907	0.0217	0.0171	0.0197
192774	0.00834928	0.00133379	0.00333868	1.28722e-37	0.0175029	0.0380835	0.00455653	0.000418986	0.159025	0.199464	0.142043	0.0685623	0.0159171	0.0386037	8.41432e-06	192774	Sphagnum wetland (X9)	0.0039	0.0191	0.0013	0.0191	0	0.0112	0.0092	0	0.0066	0.3182	0.3083	0.0848	0	0.119	0.0993
193589	2.03516e-07	0.057625	0.00117241	4.27331e-12	0.103253	0.220238	0.000792234	1.98804e-05	0.334869	0.0369492	0.00210563	0.00119615	0.00326119	0.0117456	0.000878592	193589	Forested wetland (X5)	0	0.2512	0.0066	0.0237	0	0.499	0.0007	0	0.1795	0.0026	0.0348	0.002	0	0	0
193594	0.000145531	0.000420789	0.0100494	8.86884e-29	0.0941375	0.0603726	0.00858709	0.00291627	0.214997	0.0701806	0.0544696	0.307877	0.0238263	0.0472067	0.000495064	193594	Sedge wetland (X10)	0.1795	0.0585	0.0007	0.0059	0.0007	0.0703	0.0296	0.0007	0.1229	0.0868	0.3425	0.0986	0	0.002	0.0013
193609	3.12576e-13	0.511914	3.20951e-05	8.1782e-17	0.00828435	0.00180312	0.000330416	1.51401e-05	0.0687926	0.164112	0.000303577	0.00174796	0.00325365	0.0323569	2.71924e-07	193609	Water bodies (X1)	0.0042	0.5797	0	0	0.0017	0.0299	0	0	0.005	0.157	0.1512	0.0083	0.0017	0.005	0.0565
193630	2.71751e-08	0.0119461	0.00704645	1.53048e-21	0.0124983	0.00494735	0.00413943	0.0142958	0.20872	0.280536	0.0876242	0.126019	0.00394706	0.0168776	1.46393e-07	193630	Sphagnum wetland (X9)	0.0058	0	0	0	0.0347	0	0	0	0	0.9422	0	0	0	0.0058	0.0116
194420	5.44712e-08	0.0299539	0.000910834	4.39016e-16	0.0627557	0.510623	0.000919874	2.21557e-05	0.243352	0.0271012	0.112917	0.000407142	0.00217649	0.00919649	0.000222934	194420	Willow wetland (X8)	0	0.0592	0	0.0026	0	0.1986	0	0	0.6634	0.0329	0.0421	0	0	0.0013	0
194421	5.0501e-07	0.0231791	0.00265149	2.9094e-15	0.0536556	0.524296	0.00301936	0.000320241	0.238076	0.0507768	0.139517	0.00394807	0.00324664	0.0120561	0.000600851	194421	Willow wetland (X8)	0.0039	0.2604	0	0.021	0	0.1552	0	0	0.4826	0.0631	0.0112	0.0013	0	0.0013	0
194430	0.0280822	0.00159526	0.00194059	7.77551e-27	0.04417	0.0435878	0.00145902	2.89945e-05	0.165155	0.0626099	0.198666	0.0227297	0.0260314	0.0684749	0.00164997	194430	Sedge wetland (X10)	0.0151	0.027	0.0007	0.0026	0.0013	0.0283	0.025	0	0.0815	0.1243	0.4162	0.1354	0	0.0348	0.1078
194433	8.14383e-05	0.0232955	0.0111904	9.58957e-14	0.0217965	0.0814832	0.00761671	0.00844814	0.143972	0.173285	0.124822	0.128249	0.00793228	0.0274495	0.00035425	194433	Peat bog (X11)	0.0092	0.2222	0	0.0191	0	0.0046	0.0092	0	0.0007	0.1828	0.1703	0.2465	0.0085	0.046	0.0809
194438	1.15705e-26	0.687605	7.22009e-09	1.63592e-37	0.0113426	0.000764361	0.000222076	2.24377e-08	0.051053	0.0371213	8.03204e-09	0.00148739	0.00411141	0.0809924	8.67877e-09	194438	Water bodies (X1)	0	0.9952	0	0	0	0	0	0	0	0	0.0048	0	0	0	0
195262	0.00211433	0.0157964	0.00935619	4.99279e-17	0.0288446	0.2725	0.00343449	0.000873882	0.124296	0.0836203	0.367226	0.0112662	0.00584299	0.0175934	0.000487868	195262	Sedge wetland (X10)	0.0013	0.0769	0	0.0178	0	0.0237	0	0	0	0.075	0.3557	0.0388	0.0039	0.0703	0.3366
196070	0.000179128	0.0259467	0.0033387	8.38311e-16	0.0879666	0.833503	0.00146222	2.4698e-05	0.0623798	0.00778573	0.0518823	0.000704182	0.00372399	0.00921436	0.00860562	196070	Forested wetland (X5)	0.0093	0.0391	0.0133	0.0046	0.0046	0.7467	0	0	0.065	0.0146	0.0975	0.004	0.0007	0	0.0007
196903	9.95486e-06	0.0157661	0.00248343	2.24093e-11	0.114957	0.311679	0.0017527	0.000104397	0.458163	0.036106	0.0684418	0.00657918	0.00651126	0.0189256	0.0174581	196903	Willow wetland (X8)	0	0.0184	0	0.0013	0	0.0283	0	0	0.7692	0.1545	0.0283	0	0	0	0
197747	9.26185e-05	0.0418881	0.00464994	1.61276e-12	0.032961	0.0656548	0.00133416	0.000405967	0.271218	0.12771	0.149093	0.00527104	0.00471794	0.0169063	0.000194332	197747	Sedge wetland (X10)	0.0026	0.0131	0	0	0	0.1637	0	0	0.0059	0	0.8133	0	0	0	0.0013
198556	9.40183e-05	0.0426684	0.00129711	4.33899e-18	0.064199	0.835022	0.00120519	1.48534e-05	0.0184145	0.00429289	0.0796883	0.000455654	0.00515504	0.0126834	0.0139539	198556	Forested wetland (X5)	0	0.0164	0.0033	0.0487	0.0072	0.9027	0	0	0.0151	0.0013	0.0046	0	0	0.0007	0
198564	0.000198214	0.00885008	0.0062501	1.01302e-12	0.0725025	0.280915	0.00331711	0.000523642	0.342069	0.0593281	0.267772	0.020728	0.00820077	0.023934	0.0100162	198564	Sedge wetland (X10)	0.0007	0.0046	0.002	0.0039	0	0.2058	0	0	0.0585	0.0546	0.6693	0	0	0	0.0007
198566	0.000345845	0.0157162	0.00122105	2.2967e-26	0.0436397	0.68687	0.00155262	4.0681e-05	0.0221953	0.00699751	0.347161	0.000954084	0.00720852	0.0147266	0.00213982	198566	Forested wetland (X5)	0.0007	0.0007	0.0039	0.0007	0	0.6226	0	0	0.0802	0	0.2893	0	0	0	0.002
198567	0.00333868	0.00855571	0.00273702	8.2148e-24	0.0596579	0.504698	0.00151099	4.88233e-05	0.0725968	0.0134583	0.256284	0.00202493	0.0078216	0.0155936	0.00270199	198567	Sedge wetland (X10)	0.002	0.0039	0	0.0039	0	0.1032	0	0	0.0085	0.0092	0.8429	0.0118	0.0007	0	0.0138
198568	0.0188962	0.00704179	0.00813514	1.43432e-17	0.0479741	0.123951	0.00170418	0.000140018	0.235188	0.0818134	0.164827	0.0095185	0.00844911	0.0238646	0.00095217	198568	Sedge wetland (X10)	0.0072	0.0105	0.0026	0.0039	0	0.0263	0.0007	0	0.0013	0.0276	0.883	0.0309	0	0	0.0059
199386	3.98953e-05	0.0282675	0.00170189	2.0523e-15	0.101667	0.747965	0.00132812	1.3274e-05	0.122482	0.0122845	0.0174537	0.000907317	0.00453359	0.0126109	0.0139228	199386	Forested wetland (X5)	0.0013	0.0092	0.0158	0.0072	0.0092	0.8698	0	0	0.0237	0.0013	0.0618	0	0	0	0.0007
199390	0.00182314	0.0036658	0.0129345	5.67291e-14	0.102688	0.325583	0.00312027	0.000407	0.286796	0.0374722	0.232537	0.0204509	0.00879158	0.0217964	0.0112159	199390	Forested wetland (X5)	0.0059	0.0184	0.0046	0.002	0	0.4977	0	0	0.0644	0.0112	0.3958	0	0	0	0
199391	0.00196319	0.0057024	0.00383585	4.25698e-19	0.0970934	0.518502	0.00199687	4.77389e-05	0.161195	0.0174464	0.102526	0.00518964	0.00899855	0.0201359	0.0152121	199391	Forested wetland (X5)	0.0026	0.0033	0.0151	0	0	0.8054	0	0	0.0401	0	0.1335	0	0	0	0
199393	0.000233234	0.0180702	0.00167301	1.44426e-21	0.0474877	0.500461	0.00158532	0.000103569	0.048673	0.0140054	0.468284	0.00166489	0.00771361	0.0178342	0.00326214	199393	Forested wetland (X5)	0.0007	0.0007	0.0013	0.0131	0	0.4793	0	0	0.0355	0	0.4675	0	0	0	0.002
199403	2.70778e-06	0.00630436	0.00384898	4.53971e-16	0.0446844	0.0806894	0.00328618	0.00142902	0.163566	0.10623	0.430226	0.0263796	0.0100739	0.0419451	0.00049146	199403	Dwarf shrub subsiding (X14)	0.0164	0.002	0	0.0092	0	0.0039	0.0013	0	0.0072	0.2735	0.0552	0.0697	0.0039	0.24	0.3176
199404	0.250262	0.00497688	0.0583662	9.63061e-16	0.0909376	0.225962	0.00323553	0.000727793	0.113916	0.0322082	0.018124	0.0314327	0.00780722	0.0135903	0.00207509	199404	Dwarf shrub subsiding (X14)	0.0579	0.0335	0.0197	0.0644	0.0033	0.1223	0.0138	0.0007	0.0907	0.0026	0.0828	0.121	0.002	0.0874	0.2978
200212	0.000115081	0.0147526	0.0035274	2.0593e-13	0.0890128	0.581904	0.0017131	8.47246e-05	0.112335	0.0141252	0.221325	0.00260142	0.00638908	0.0173658	0.0185285	200212	Forested wetland (X5)	0.0007	0.0401	0.0007	0.0316	0.0007	0.7423	0	0	0.1144	0.0079	0.0611	0	0	0.0007	0
200216	0.0126018	0.0118622	0.00879417	1.98899e-13	0.201782	0.665768	0.00145129	4.87461e-05	0.175629	0.00710238	0.0206157	0.00289405	0.0071508	0.0109053	0.107358	200216	Forested wetland (X5)	0.0026	0.0861	0.0079	0.0145	0	0.6759	0	0	0.0657	0.0079	0.1387	0.0007	0	0	0
200218	4.89715e-05	0.0197654	0.0032467	3.02351e-11	0.0875532	0.426053	0.00247297	0.000169544	0.25316	0.0300877	0.0909264	0.0090936	0.0073552	0.0209843	0.0304197	200218	Forested wetland (X5)	0.002	0.1782	0.0046	0.0197	0	0.5365	0	0	0.0973	0.0145	0.144	0.0026	0	0	0.0007
200225	0.00389826	0.0001327	0.00301193	3.57277e-36	0.0918905	0.0577368	0.00117109	1.22239e-05	0.151558	0.031468	0.159899	0.0104552	0.0206665	0.0489279	8.34476e-05	200225	Sedge wetland (X10)	0.0493	0.023	0.0243	0	0	0.2571	0.0072	0	0.0112	0.0316	0.5924	0.002	0.0007	0	0.0013
200230	6.36535e-06	0.00800479	0.00328204	1.80929e-21	0.0184168	0.0955652	0.00623605	0.00283979	0.133253	0.156439	0.517326	0.0599313	0.00918881	0.0366399	0.00010123	200230	Sphagnum wetland (X9)	0.0072	0.0125	0.0007	0.0053	0	0.0092	0	0	0.0066	0.4352	0.3143	0.0487	0.025	0.0112	0.1243
200231	0.0253543	0.000650824	0.0643612	2.29789e-18	0.126493	0.078418	0.00347623	0.00110234	0.123768	0.0571718	0.0396847	0.0658401	0.0133027	0.0317562	0.000603883	200231	Dwarf shrub subsiding (X14)	0.0677	0.021	0.0131	0.0256	0.0013	0.0677	0.0066	0.0007	0.0618	0.0763	0.1275	0.1078	0	0.1072	0.3156
200234	0.000239708	0.234917	0.00588595	5.58995e-07	0.0112422	0.0164638	0.00114548	0.000508013	0.0392342	0.184191	0.0156505	0.00839939	0.00503441	0.0262177	5.23674e-05	200234	Sphagnum wetland (X9)	0.027	0.1691	0.002	0	0.0013	0.0079	0.0118	0	0.0724	0.2928	0.1882	0.15	0.0257	0.0079	0.0441
200235	2.15799e-24	0.550607	5.17364e-08	5.23392e-30	0.0110144	0.000351437	0.000185131	1.64965e-07	0.0955427	0.0530168	5.62963e-07	0.00204642	0.00391343	0.0714757	1.37798e-08	200235	Water bodies (X1)	0.0013	0.8344	0	0	0	0	0	0	0.0158	0.1235	0.0092	0	0.0105	0.0053	0
201055	0.00199206	0.00182055	0.0111265	4.59478e-33	0.0247087	0.0737667	0.00954239	0.00409972	0.184379	0.179118	0.0782406	0.161604	0.010728	0.0223543	1.17565e-05	201055	Peat bog (X11)	0.1709	0.0782	0.1295	0.0053	0	0.0289	0.0342	0.0059	0.0224	0.1032	0.1926	0.1986	0.0164	0.0072	0.0066
201062	0.035033	0.00716037	0.0294731	2.09739e-09	0.0650514	0.00758859	0.00160039	0.000847512	0.0392841	0.0931977	0.00941849	0.0791358	0.0238006	0.0774118	0.0018326	201062	Peat bog (X11)	0.0697	0.0316	0.0224	0.0092	0.0644	0.1243	0.0342	0.0007	0.1578	0.0519	0.1321	0.1617	0.0112	0.0789	0.05
201875	0.00108869	0.0231902	0.00350924	1.01585e-15	0.1005	0.785126	0.00123605	2.44054e-05	0.0269535	0.00429421	0.0605075	0.000828253	0.00609692	0.0128993	0.0308896	201875	Forested wetland (X5)	0.0007	0.0125	0.0151	0.025	0.0046	0.9198	0	0	0.0158	0	0.0066	0	0	0	0
201879	5.44486e-07	0.0303857	0.00192407	5.92304e-12	0.0498717	0.14858	0.00158791	0.00016625	0.370806	0.0872621	0.0888419	0.00486111	0.00415463	0.0181147	0.000499396	201879	Sedge wetland (X10)	0.0013	0.0053	0.0033	0.0099	0	0.1361	0	0	0.1861	0.2505	0.3728	0.0007	0	0.0066	0.0276
201886	0.000131237	0.00280431	0.0520421	6.90338e-09	0.244753	0.376846	0.00213813	0.000878084	0.170549	0.0198488	0.062693	0.00648333	0.00489818	0.0123587	0.00336035	201886	Willow wetland (X8)	0.0053	0.0401	0.0526	0.1394	0.0197	0.2913	0.0007	0.0013	0.3077	0	0.002	0.0164	0	0.025	0.0986
202695	0.0037162	0.00232829	0.00921438	1.31232e-20	0.0815638	0.168118	0.00368248	0.000521855	0.458907	0.0818719	0.180074	0.0391761	0.0109373	0.0241237	0.00232309	202695	Willow wetland (X8)	0	0.0408	0	0.0026	0	0.3202	0	0	0.5667	0.0039	0.0651	0	0	0.0007	0
202701	0.000141728	0.00672962	0.00155811	2.07811e-26	0.115908	0.813357	0.00202276	1.90289e-05	0.0720465	0.00550298	0.0300241	0.00173024	0.00706606	0.0122116	0.00854597	202701	Forested wetland (X5)	0	0.0072	0.0039	0.0007	0	0.8902	0	0	0.0243	0.0079	0.0657	0	0	0	0
202702	0.00124945	0.0102374	0.00387554	3.96408e-15	0.171857	0.421743	0.000772702	3.89654e-05	0.0185349	0.00236091	0.0892828	0.0014926	0.0133012	0.0228647	0.0858373	202702	Forested wetland (X5)	0.0007	0.0059	0.002	0.0039	0.0039	0.9343	0	0	0.0151	0.0007	0.0335	0	0	0	0
202708	0.0110245	0.000707423	0.00257624	3.12328e-31	0.0363161	0.0690925	0.00187301	3.63685e-05	0.18284	0.0831897	0.377853	0.0170289	0.0175182	0.0515947	0.000156916	202708	Sedge wetland (X10)	0.0039	0.0145	0	0.002	0	0.027	0	0	0.0487	0.4306	0.4359	0.0145	0.0092	0.0046	0.0092
202713	3.20898e-05	0.00364602	0.0692752	3.69746e-15	0.0439193	0.0746752	0.00531782	0.0174327	0.196913	0.139275	0.262481	0.0514157	0.00345165	0.0113172	7.56796e-06	202713	Exposed rock (X2)	0.0638	0.0493	0.1953	0.0224	0.002	0.1177	0.0046	0.0013	0.1723	0.0033	0.1118	0.094	0	0.0105	0.1519
202716	0.00102508	0.00126007	0.185767	2.65367e-07	0.271976	0.186895	0.00191153	0.00409202	0.220194	0.0260077	0.244977	0.00913841	0.00448232	0.0100833	0.000861788	202716	Sparse birch forest (X4)	0.0013	0.0039	0.0565	0	0.9185	0.0197	0	0	0	0	0	0	0	0	0
203523	0.000135022	0.00279805	0.0097517	6.21376e-19	0.0771135	0.104593	0.00448085	0.00148168	0.552895	0.106478	0.151356	0.0700136	0.0088046	0.0213605	0.000783562	203523	Willow wetland (X8)	0.0009	0.0088	0.0053	0.0018	0.0026	0.1843	0.0018	0	0.5212	0.1437	0.1199	0.0088	0	0.0009	0
203534	3.2931e-06	0.00796918	0.00378404	9.51026e-15	0.101195	0.491136	0.00239264	0.000194032	0.350581	0.0295431	0.202065	0.00505212	0.00455542	0.0135937	0.00311731	203534	Forested wetland (X5)	0	0.0046	0.0033	0.0033	0.002	0.7298	0	0	0.0388	0.0013	0.2137	0	0	0.0007	0.0026
203542	0.00248302	0.00318245	0.134586	2.85642e-19	0.0726092	0.37138	0.00666302	0.00486699	0.0264636	0.0141517	0.0131516	0.0500969	0.00379156	0.00648181	5.55301e-05	203542	Forested wetland (X5)	0.0151	0.075	0.2459	0.1026	0.1328	0.3149	0	0	0.075	0	0	0.0085	0	0.0302	0
204366	0.00216037	0.000174461	0.00197568	3.35697e-46	0.0224991	0.0148314	0.00365333	0.000171158	0.262143	0.262076	0.214158	0.0749547	0.0227294	0.0582254	1.13451e-06	204366	Sphagnum wetland (X9)	0.0408	0.0375	0	0.0059	0.0007	0.0243	0.0039	0	0.0414	0.4057	0.2262	0.0848	0.0999	0.0191	0.0099
204377	2.5204e-25	0.646493	1.4304e-08	1.78242e-34	0.0142469	0.000744805	0.000278172	3.24024e-08	0.0505912	0.0367716	5.49969e-09	0.00353095	0.00588381	0.102611	5.67774e-08	204377	Water bodies (X1)	0	0.7644	0	0.0667	0.0044	0.1022	0	0	0	0	0	0	0	0.0622	0
205183	0.00172201	0.00473606	0.00422689	1.60561e-18	0.153601	0.483332	0.00126175	2.96383e-05	0.0611514	0.00634679	0.0527925	0.0029329	0.0113225	0.0221984	0.0302314	205183	Forested wetland (X5)	0.0027	0.0134	0.004	0.0053	0	0.7009	0	0	0.008	0.004	0.2617	0	0	0	0
205205	4.61831e-21	0.269379	1.02714e-06	8.03369e-21	0.0110179	0.000326442	0.000276147	3.55346e-06	0.196695	0.0938958	0.000136474	0.00567492	0.00377685	0.0633225	4.84003e-08	205205	Willow wetland (X8)	0	0.1983	0	0.0245	0.0022	0.1053	0	0	0.3627	0.1226	0.0137	0.0007	0	0.1687	0.0014
206023	0.0120793	0.00162783	0.143645	6.78218e-07	0.19558	0.131012	0.00371593	0.00306761	0.0901791	0.0332842	0.029763	0.0708883	0.0112614	0.0283592	0.00823625	206023	Forested wetland (X5)	0.0026	0.1216	0.1151	0.0513	0.0204	0.3176	0.0013	0	0.2071	0	0.0743	0.0329	0	0.0296	0.0263
206024	0.0360079	0.000919142	0.141632	1.09383e-10	0.239822	0.3288	0.00276559	0.000432335	0.113408	0.0141897	0.0162531	0.026358	0.00718579	0.015104	0.00552326	206024	Sparse birch forest (X4)	0	0.0736	0.1861	0.0888	0.3366	0.2834	0	0	0.0256	0	0	0	0	0.0059	0
206026	0.00585292	0.0023515	0.0705087	3.65962e-06	0.326351	0.321755	0.00196409	0.000484231	0.117022	0.0109247	0.0211436	0.0142594	0.00952745	0.0196326	0.0594804	206026	Sparse birch forest (X4)	0	0	0.0552	0.0007	0.9362	0.0079	0	0	0	0	0	0	0	0	0
206847	0.00224327	0.0030181	0.00872543	1.06447e-19	0.0844047	0.330961	0.00294645	0.00027216	0.281991	0.0473582	0.228033	0.0126805	0.00835098	0.0198942	0.0025412	206847	Forested wetland (X5)	0.0033	0.0171	0.0217	0.0013	0	0.5494	0	0	0.1291	0.085	0.1924	0.0007	0	0	0
206850	0.000322589	5.4964e-05	0.00179778	8.92196e-56	0.0173438	0.0129878	0.00605813	0.000175843	0.120516	0.213892	0.0616016	0.170228	0.0244081	0.059689	6.9928e-08	206850	Sphagnum wetland (X9)	0.0901	0.0085	0	0.0007	0	0	0.0039	0	0.0013	0.478	0.1466	0.142	0.1203	0.002	0.0066
206852	0.0649525	0.000275342	0.1503	6.04007e-06	0.519688	0.224077	0.00110714	5.15896e-05	0.0791209	0.00461503	0.0059261	0.0157652	0.0137854	0.0304854	0.0906702	206852	Forested wetland (X5)	0.002	0.094	0.0493	0.0986	0.2341	0.3287	0.0033	0.0007	0.1216	0	0.0283	0.0263	0	0.0092	0.0039
206853	0.0377335	0.000487279	0.101314	1.75472e-06	0.442221	0.192543	0.0013071	7.93584e-05	0.0649169	0.00552031	0.00593338	0.02182	0.0160001	0.0353869	0.10535	206853	Sparse birch forest (X4)	0	0.0072	0.0526	0	0.8573	0.0809	0	0	0.002	0	0	0	0	0	0
208509	7.70588e-05	0.000470057	0.0562106	6.13168e-28	0.295975	0.0828289	0.00298714	0.00992624	0.255006	0.0187593	0.0392376	0.0279904	0.00743186	0.00730328	3.72832e-05	208509	Exposed rock (X2)	0.0667	0	0.6	0	0.2	0.1333	0	0	0	0	0	0	0	0	0
214994	0.464663	0.0036733	0.0921576	4.08853e-54	0.0462854	0.220883	0.00227059	0.00234088	0.00579066	0.00467086	0.00037065	0.00251528	0.00193113	0.000633575	3.50091e-09	214994	Sparse birch forest (X4)	0.0682	0	0.2159	0	0.5682	0.1477	0	0	0	0	0	0	0	0	0
214996	0.567956	0.0055312	0.126084	5.81032e-24	0.0845628	0.175712	0.00283376	0.00217648	0.0315742	0.0139024	0.00461466	0.0202083	0.00543542	0.00522117	6.16308e-05	214996	Anthropogenic (X0)	0.8554	0	0.01	0	0.0823	0.0524	0	0	0	0	0	0	0	0	0
214997	0.648592	0.00875791	0.0773422	3.99024e-20	0.0737177	0.0987721	0.0022921	0.001841	0.126953	0.0440292	0.0142961	0.0191566	0.00615438	0.00747234	0.00015959	214997	Anthropogenic (X0)	0.8865	0	0.0904	0	0.0195	0.0035	0	0	0	0	0	0	0	0	0
215819	0.793579	0.00220876	0.153211	9.3696e-61	0.044036	0.168128	0.00482122	0.0166404	0.0190281	0.0173912	0.000226088	0.00764481	0.00193709	0.000484425	5.13079e-10	215819	Anthropogenic (X0)	0.8996	0	0.0156	0.0011	0.0536	0.0301	0	0	0	0	0	0	0	0	0
215820	0.720885	0.00605657	0.0947214	3.23571e-72	0.048694	0.106182	0.00257517	0.0189354	0.00658172	0.00475614	1.74228e-05	0.0022424	0.00148836	0.000155274	2.52171e-11	215820	Anthropogenic (X0)	0.8253	0	0.0343	0	0.08	0.0604	0	0	0	0	0	0	0	0	0
215823	0.68348	0.00496377	0.0893315	1.76442e-73	0.0368546	0.119979	0.00233608	0.0120348	0.00540939	0.00566416	3.48549e-05	0.00134144	0.00122915	0.000153787	7.91811e-12	215823	Anthropogenic (X0)	0.6506	0	0.06	0.015	0.1806	0.0931	0	0	0.0006	0	0	0	0	0	0
215827	0.531584	0.000440662	0.0583964	6.36564e-43	0.0467902	0.0779839	0.000331498	1.21427e-05	0.00753316	0.00993181	0.0164235	0.000200708	0.00240143	0.0035271	5.9127e-09	215827	Forested wetland (X5)	0.0588	0	0.1075	0.0562	0.0794	0.3469	0.0006	0	0.3356	0	0.0031	0.0075	0.0006	0.0025	0.0012
216640	0.219382	0.0184937	0.256535	0.931602	0.324688	0.208565	0.000879697	0.00448159	0.0684989	0.00646477	0.064971	0.00309458	0.0050613	0.00600148	0.0288307	216640	Anthropogenic (X0)	1	0	0	0	0	0	0	0	0	0	0	0	0	0	0
216641	0.595589	0.0103598	0.170109	2.3808e-08	0.215504	0.0535363	0.00101566	0.00139133	0.0207146	0.0053333	0.00266992	0.0182283	0.0105617	0.0111841	0.00677608	216641	Anthropogenic (X0)	0.8425	0	0.0137	0	0.1301	0.0137	0	0	0	0	0	0	0	0	0
216645	0.789411	0.0107191	0.0652592	1.58386e-73	0.036771	0.05798	0.0016506	0.012929	0.00543741	0.00571219	1.64534e-05	0.00116059	0.00144823	0.000150807	9.13854e-12	216645	Anthropogenic (X0)	0.8306	0	0.0169	0.0175	0.1212	0.0138	0	0	0	0	0	0	0	0	0
216647	0.50912	0.00422558	0.069748	6.96304e-71	0.242901	0.00145264	0.000374325	0.0123871	0.00632276	0.00197397	4.1371e-07	0.00197265	0.00540011	0.000320449	6.27799e-11	216647	Anthropogenic (X0)	0.5688	0	0.0669	0.0331	0.2581	0.0731	0	0	0	0	0	0	0	0	0
216649	0.335111	0.0118805	0.0688784	4.13051e-46	0.233556	0.00131654	0.00040543	0.00861343	0.0082156	0.00325774	3.70972e-06	0.00723119	0.0101262	0.00166047	7.4496e-08	216649	Shadow (X3)	0.0881	0	0.1206	0.4681	0.1912	0.1319	0	0	0	0	0	0	0	0	0
216650	0.295833	0.0135253	0.0922642	2.74188e-07	0.412471	0.00373546	0.000237946	0.000556114	0.0413457	0.00446119	0.000328676	0.00888454	0.0172466	0.0140963	0.00695456	216650	Shadow (X3)	0.0281	0	0.1062	0.7075	0.0981	0.06	0	0	0	0	0	0	0	0	0
216652	0.00590052	0.0176593	0.0923081	0.0026313	0.0755373	0.168554	0.00305928	0.00745999	0.12609	0.0591183	0.230182	0.0209699	0.00489334	0.0133965	0.00235225	216652	Exposed rock (X2)	0.0006	0	0.7281	0.1331	0.0938	0.0444	0	0	0	0	0	0	0	0	0
217467	0.613666	0.0395007	0.100902	6.05401e-30	0.0724757	0.114524	0.00200411	0.00589438	0.00819944	0.00433695	0.000305632	0.011256	0.00424217	0.00181474	1.01244e-05	217467	Anthropogenic (X0)	0.985	0	0.006	0	0.003	0.005	0	0	0	0	0	0.001	0	0	0
217469	0.59002	0.00531156	0.0922681	2.32242e-77	0.0280249	0.15581	0.0023457	0.0132931	0.00297945	0.00470233	3.77718e-05	0.000768335	0.000898548	0.000105808	1.2329e-12	217469	Anthropogenic (X0)	0.83	0	0.02	0.0025	0.1038	0.035	0	0	0.0044	0	0	0.0044	0	0	0
217471	0.413356	0.00296223	0.0804064	4.37448e-69	0.198611	0.00237757	0.000439329	0.00944264	0.00537334	0.00245519	1.26146e-06	0.00178513	0.00464774	0.00038344	5.29166e-11	217471	Anthropogenic (X0)	0.3888	0	0.2294	0.1619	0.1825	0.0375	0	0	0	0	0	0	0	0	0
217472	0.610288	0.030574	0.123169	6.31218e-24	0.0520734	0.077903	0.0030392	0.0122545	0.0277788	0.023036	0.00192333	0.0274075	0.00477039	0.00358624	1.853e-05	217472	Exposed rock (X2)	0.0619	0	0.3906	0.12	0.3306	0.0969	0	0	0	0	0	0	0	0	0
217475	0.00322816	0.0544406	0.0617269	0.059638	0.179723	0.00288816	0.000729277	0.00747237	0.017665	0.011096	0.00082744	0.0555249	0.0183991	0.0249721	0.00639769	217475	Shadow (X3)	0.0006	0	0.0262	0.8194	0.0025	0.1512	0	0	0	0	0	0	0	0	0
217478	0.0305198	0.0136139	0.102015	0.0672133	0.316748	0.105748	0.00111296	0.00322634	0.0478809	0.00618992	0.0266296	0.0113783	0.0112978	0.0147763	0.0916747	217478	Shadow (X3)	0.0012	0	0.2038	0.6375	0.035	0.1225	0	0	0	0	0	0	0	0	0
218291	0.8585	0.00567437	0.105486	7.0961e-14	0.163328	0.255008	0.000986658	0.000160781	0.0917397	0.0103736	0.0128064	0.00373237	0.00516407	0.00655172	0.00197914	218291	Anthropogenic (X0)	0.9875	0	0	0	0.0053	0.0018	0	0	0	0	0	0.0053	0	0	0
218294	0.382216	0.00162439	0.0738309	3.30244e-84	0.0316799	0.00461816	0.000311362	0.0028267	0.00112159	0.00824681	2.83676e-05	7.44387e-05	0.00113532	0.000174707	3.40309e-15	218294	Anthropogenic (X0)	0.5462	0	0.0106	0.0131	0.005	0.1119	0.0006	0.0025	0.2744	0	0.0031	0.0238	0.0019	0.0069	0
218308	0.010425	0.00432545	0.129142	0.00328972	0.244316	0.196967	0.00222889	0.00270446	0.0815453	0.0155964	0.0526986	0.0212929	0.0087147	0.0181403	0.0268357	218308	Forested wetland (X5)	0.0369	0	0.0462	0.0412	0.2262	0.2962	0	0.0006	0.2275	0	0	0.1225	0.0025	0	0
219130	0.00233849	0.00398803	0.0794876	3.22498e-05	0.261837	0.066169	0.0018935	0.00438073	0.129794	0.0215919	0.0514726	0.0327998	0.0121306	0.0230878	0.0178462	219130	Exposed rock (X2)	0.0269	0	0.5	0.0794	0.355	0.0388	0	0	0	0	0	0	0	0	0
219140	5.76133e-05	0.0280459	0.0191813	1.50852e-06	0.0335928	0.0606791	0.00342557	0.0171575	0.0754084	0.100969	0.690323	0.0313997	0.00772103	0.0284288	0.000842774	219140	Sedge wetland (X10)	0	0.0012	0.0006	0	0	0.0031	0	0	0	0.0394	0.9531	0.0006	0.0006	0.0012	0
219963	0.029554	0.0134062	0.14112	8.72887e-26	0.0506008	0.166176	0.00593215	0.0340881	0.0360592	0.0249896	0.00682776	0.04088	0.00327647	0.00289453	5.07859e-06	219963	Exposed rock (X2)	0.0012	0.0475	0.4925	0.0081	0	0.03	0	0.0712	0.0038	0.2438	0.05	0.0094	0	0.0262	0.0162
219968	0.00012415	0.0270955	0.0262461	3.60834e-07	0.0359886	0.100378	0.00350439	0.0154333	0.090615	0.090256	0.670138	0.0224162	0.00576323	0.0193649	0.000591757	219968	Sedge wetland (X10)	0	0.0019	0.0025	0	0	0.0044	0	0.0012	0.0006	0.0494	0.9319	0.0031	0	0.0031	0.0019
219969	2.09388e-05	0.0237182	0.00401345	1.28371e-18	0.00844894	0.0208634	0.0066721	0.0138011	0.0413193	0.192104	0.572581	0.167756	0.0138778	0.0555526	7.45028e-05	219969	Sedge wetland (X10)	0.0016	0.0048	0.0065	0	0	0.0048	0	0	0	0.1922	0.7851	0	0	0.0048	0
220766	0.650424	0.00933446	0.0966185	0.00373898	0.262378	0.064171	0.000510887	0.000336754	0.0375144	0.00698888	0.027983	0.00432613	0.0126672	0.0192524	0.0538634	220766	Anthropogenic (X0)	0.9392	0	0	0	0.0418	0	0.0114	0	0.0038	0	0	0.0038	0	0	0
220767	0.815104	0.00238382	0.0198859	4.0274e-21	0.1908	0.0699028	0.000251397	7.68284e-06	0.0798204	0.00483175	0.0185616	0.00104009	0.00979406	0.0114594	0.00136586	220767	Anthropogenic (X0)	0.9383	0	0.0024	0	0.0332	0	0.0119	0	0.0071	0	0	0.0024	0.0047	0	0
220768	0.683629	0.00437366	0.0123464	1.0783e-73	0.0139961	0.0209254	0.000374891	0.000136517	0.00650253	0.0160604	0.00043801	0.000102377	0.00142854	0.000451112	1.14122e-12	220768	Anthropogenic (X0)	0.768	0.0007	0.017	0.0417	0.0311	0.0672	0.0092	0.0007	0.0375	0.0007	0	0.0226	0.0035	0	0
220779	0.00146193	0.0025526	0.0835425	1.35471e-36	0.0219789	0.0278784	0.0153562	0.240827	0.0697512	0.240558	0.03431	0.242644	0.00610951	0.0083409	8.26283e-08	220779	Peat bog subsiding (X12)	0	0.0025	0	0	0	0	0.1319	0.1375	0.1994	0	0.0012	0.2138	0.2206	0.0544	0.0388
221606	4.73011e-05	0.00822241	0.0411725	4.88501e-23	0.0301845	0.0211108	0.0106066	0.221548	0.0507245	0.135418	0.0921492	0.266777	0.00946263	0.017796	7.47584e-06	221606	Peat bog (X11)	0	0	0.0069	0	0	0	0.0744	0.1631	0.1356	0	0	0.4712	0.0869	0.0538	0.0081
221609	0.00674317	0.00461641	0.065228	9.29438e-19	0.0632436	0.0378325	0.00827071	0.0576708	0.0710322	0.0881451	0.0504692	0.260274	0.0150354	0.0249975	0.000330529	221609	Peat bog (X11)	0	0	0	0	0.0006	0.0006	0.0388	0.0088	0.3419	0	0	0.5869	0.0188	0.0038	0
221613	0.000334103	0.0142678	0.0886391	0.00176204	0.181689	0.162023	0.0025635	0.0191474	0.130926	0.0224341	0.181943	0.0173752	0.00567349	0.010421	0.00645147	221613	Forested wetland (X5)	0	0.0238	0.0331	0.0206	0.0031	0.325	0	0.0781	0.2281	0.0656	0.0525	0.0225	0.0088	0.1038	0.035
221622	1.38695e-05	0.0283977	0.015393	1.31771e-05	0.135323	0.314811	0.00163584	0.00181524	0.157105	0.0193124	0.227133	0.00349789	0.00417122	0.0100893	0.00614374	221622	Sedge wetland (X10)	0.0012	0.0094	0.0031	0.0025	0.0294	0.0506	0	0.0019	0.0131	0.0594	0.8188	0.0075	0.0006	0.0012	0.0012
222424	0.020455	0.00318856	0.0221725	4.27715e-13	0.142875	0.359622	0.000598284	4.18251e-05	0.00948693	0.00349067	0.292639	0.000787035	0.00862088	0.0208616	0.00603818	222424	Sparse birch forest (X4)	0.0012	0	0.1912	0.1594	0.2719	0.1619	0	0.0019	0.1638	0.0038	0	0.0044	0	0.0088	0.0319
222436	0.000151765	0.00471592	0.0573675	5.98153e-20	0.0320968	0.0177266	0.0109152	0.136399	0.0359639	0.150141	0.0700554	0.36827	0.0126633	0.0308219	1.87623e-05	222436	Peat bog (X11)	0	0	0	0	0	0	0.015	0.1331	0.0988	0.0006	0.0044	0.61	0.0206	0.1012	0.0162
222443	5.29313e-05	0.0196419	0.0177899	2.78668e-13	0.0465568	0.0557711	0.00857853	0.0714175	0.0823301	0.0743187	0.182513	0.221789	0.013621	0.0283304	0.00195778	222443	Dry lichen subsiding (X7)	0	0	0.0044	0	0	0	0	0.3812	0.02	0.2575	0.0281	0.1844	0.0119	0.065	0.0475
222448	0.000701235	0.0116131	0.0444499	1.6984e-05	0.0854504	0.0912117	0.00478634	0.0148481	0.0601778	0.0500354	0.143777	0.0905201	0.0128266	0.0348478	0.0116385	222448	Peat bog (X11)	0	0.0081	0.0031	0	0	0.0231	0	0.2281	0.04	0.1169	0.1131	0.37	0.005	0.0744	0.0181
222452	0.012004	0.0038429	0.00971077	2.80007e-10	0.218883	0.133755	0.000412787	1.90108e-05	0.0199248	0.00323392	0.0781571	0.0018283	0.0175256	0.0384891	0.0722944	222452	Sedge wetland (X10)	0.0006	0.0012	0.0006	0	0.0806	0.0506	0.0006	0	0.0038	0.0369	0.8131	0.005	0	0.0069	0
223245	0.788159	0.0296997	0.0680664	3.45001e-42	0.0236407	0.0939601	0.001126	0.0015785	0.00372225	0.00941615	0.000962269	0.00121999	0.00211067	0.0011262	1.84528e-08	223245	Shadow (X3)	0.2531	0	0.1112	0.5731	0.0181	0.0238	0	0	0.0156	0	0	0.005	0	0	0
223251	0.00409429	0.0268597	0.0202543	1.06621e-08	0.129252	0.399988	0.000989514	0.000429027	0.0391737	0.00928874	0.16689	0.00117205	0.00551452	0.0108618	0.0102341	223251	Forested wetland (X5)	0.0012	0.0069	0.0069	0.1756	0.0788	0.4062	0.0056	0.0238	0.17	0.0169	0	0.0844	0.0031	0.015	0.0056
223263	1.78356e-05	0.00766276	0.0423272	8.05878e-21	0.0228057	0.0145556	0.00906742	0.180911	0.0351397	0.164104	0.156715	0.235618	0.00879547	0.022834	3.42817e-06	223263	Dry lichen subsiding (X7)	0	0.0012	0	0	0	0.0019	0.0012	0.3094	0.0606	0.0675	0.2244	0.0906	0.0231	0.0825	0.1375
223271	6.5272e-05	0.0046803	0.0208194	4.50196e-22	0.0328053	0.0178357	0.0109545	0.0635777	0.047861	0.12206	0.0610313	0.446886	0.0183029	0.0416952	7.47234e-05	223271	Sphagnum wetland (X9)	0	0.0031	0.0012	0	0	0.0038	0	0.11	0.0069	0.5656	0.0775	0.145	0.0056	0.055	0.0262
223277	0.00458163	0.00247109	0.0237019	5.78171e-10	0.0811439	0.0525816	0.00248946	0.00118537	0.0397618	0.0394777	0.325362	0.0546596	0.0222021	0.0735808	0.0107547	223277	Sedge wetland (X10)	0	0.0044	0.0006	0	0	0.0531	0	0.0931	0.0012	0.1662	0.5194	0.1525	0.0006	0.0075	0.0012
223282	0.0127737	0.0151389	0.0181281	1.7581e-12	0.124978	0.614001	0.000607987	9.87216e-05	0.00565043	0.00226301	0.370436	0.000262974	0.00568333	0.0108544	0.00775696	223282	Sedge wetland (X10)	0	0.0151	0	0	0	0.1538	0	0	0	0.0284	0.7993	0.0017	0	0.0017	0
224069	0.790202	0.0102617	0.0349589	8.21677e-72	0.0141061	0.038134	0.000918301	0.00211283	0.00437899	0.016028	0.000182198	0.000314869	0.00120857	0.000276426	1.65216e-12	224069	Anthropogenic (X0)	0.5531	0	0.0281	0.1344	0.0569	0.1988	0	0	0.0025	0	0	0.0262	0	0	0
224074	0.0247124	0.00383101	0.0257985	1.11072e-09	0.203673	0.190806	0.000769106	0.000114301	0.0359965	0.00625267	0.116062	0.00326353	0.0121439	0.0249938	0.0306142	224074	Sparse birch forest (X4)	0.1437	0	0.1956	0.0225	0.4475	0.1844	0	0	0.0056	0	0	0.0006	0	0	0
224082	7.22847e-15	0.0997392	0.000163203	5.76515e-12	0.00800855	0.000941284	0.000906425	0.00140285	0.258749	0.190485	0.28633	0.0220024	0.00285636	0.0298094	1.4027e-07	224082	Water bodies (X1)	0	0.5769	0.0044	0	0	0.0044	0	0.0681	0.0081	0.2269	0.0231	0.0031	0	0.0269	0.0581
224088	9.18411e-12	0.0323564	0.00352513	5.60054e-16	0.00687463	0.00871496	0.00370796	0.0499328	0.0857715	0.187265	0.828657	0.0380901	0.0019593	0.0135681	4.07177e-08	224088	Sedge wetland (X10)	0	0	0.0025	0	0	0.0012	0	0	0.005	0.1994	0.7906	0	0	0.0012	0
224094	2.44466e-07	0.00871617	0.0157698	7.80624e-17	0.0303012	0.0163886	0.00725185	0.106443	0.0497094	0.102888	0.320183	0.204449	0.00977723	0.0301505	2.17303e-05	224094	Sphagnum wetland (X9)	0	0	0.0006	0	0	0.0006	0	0.2438	0.0175	0.2556	0.1	0.1044	0.0081	0.1688	0.1006
224105	0.00248346	0.00270197	0.0235655	1.04566e-11	0.0669255	0.0521899	0.00366391	0.00327168	0.0444519	0.0549357	0.397179	0.0876104	0.0221196	0.0704063	0.00618967	224105	Sedge wetland (X10)	0	0.0025	0.0006	0	0	0.1025	0	0.0719	0.0038	0.1656	0.5625	0.0731	0.0044	0.0119	0.0012
224894	0.546959	0.00574791	0.0664648	1.17403e-55	0.221378	0.00144578	0.00030081	0.00406133	0.00790519	0.00310793	2.93081e-06	0.00240527	0.00726606	0.000962708	3.18755e-09	224894	Anthropogenic (X0)	0.375	0	0.1025	0.0512	0.325	0.1025	0.0006	0	0.0188	0	0	0.0244	0	0	0
224914	0.000159805	0.0118157	0.072927	1.64589e-10	0.0364626	0.0188555	0.00758814	0.145486	0.040744	0.134383	0.159507	0.251493	0.0108566	0.0309124	0.000121616	224914	Peat bog (X11)	0	0.0006	0	0	0	0.0081	0.0038	0.0912	0.0731	0.0388	0.1081	0.5612	0.0094	0.0781	0.0275
225730	0.000291935	0.00809685	0.0801161	0.00373562	0.264469	0.233746	0.00201421	0.00660558	0.163542	0.0146068	0.166734	0.010638	0.00580805	0.0106799	0.0163582	225730	Sparse birch forest (X4)	0.1269	0	0.1962	0.0069	0.61	0.0594	0	0	0	0	0	0.0006	0	0	0
225740	0.000607443	0.00120006	0.031275	1.39328e-29	0.0520422	0.0326212	0.01259	0.035488	0.0993885	0.110624	0.0281705	0.430753	0.0166974	0.0274317	3.02657e-05	225740	Peat bog (X11)	0	0.0006	0	0.0006	0	0.0131	0.0088	0.0175	0.1138	0	0	0.825	0.0069	0.0138	0
225741	0.000498679	0.00192515	0.0203316	3.51919e-36	0.0289721	0.0205723	0.0155003	0.0708843	0.0686955	0.139804	0.0202144	0.503298	0.0167471	0.0229634	3.89585e-06	225741	Peat bog (X11)	0	0.0012	0	0	0	0.0144	0.0162	0.0181	0.08	0	0	0.8456	0.0044	0.02	0
225745	3.69012e-05	0.0117176	0.0329675	1.73233e-12	0.0287534	0.0360415	0.00784541	0.067737	0.0842322	0.128939	0.373362	0.195936	0.00861532	0.0258903	0.00012867	225745	Peat bog (X11)	0	0	0.0006	0	0	0.0094	0.0031	0.07	0.0175	0.0031	0	0.8825	0.0012	0.0119	0.0006
225746	6.41754e-05	0.00851324	0.0749765	0.000375669	0.116776	0.120299	0.00289435	0.01227	0.11069	0.0426233	0.258459	0.0216927	0.00530911	0.0155496	0.00122149	225746	Sedge wetland (X10)	0	0.01	0	0	0	0.0725	0.0025	0.0162	0.0875	0.0538	0.4156	0.2394	0.0006	0.06	0.0419
225749	0.00173376	0.00312936	0.0900195	1.17524e-20	0.0479376	0.024203	0.0106225	0.110946	0.0500882	0.123497	0.0423195	0.363168	0.0132247	0.0255416	3.87463e-05	225749	Peat bog (X11)	0	0.0019	0	0	0	0.0088	0.0012	0.0575	0.0531	0.0638	0.0419	0.7112	0.0006	0.0544	0.0056
225750	0.00748069	0.00137714	0.0909159	3.35684e-33	0.0373214	0.0366992	0.015559	0.106181	0.0633317	0.157961	0.0182758	0.363653	0.0104134	0.0145241	1.73006e-06	225750	Peat bog (X11)	0	0	0	0	0	0.0056	0	0.0312	0.02	0.0981	0.0994	0.7219	0.0012	0.0212	0.0012
225766	0.00164537	0.0106024	0.0280358	4.10891e-13	0.217593	0.48049	0.000751888	0.000444455	0.0195822	0.00250996	0.19492	0.000591795	0.00509662	0.00700882	0.00470185	225766	Sedge wetland (X10)	0	0.0081	0.0012	0	0	0.1894	0	0.0012	0	0.0338	0.7644	0.0012	0	0.0006	0
226560	6.85891e-05	0.0190847	0.0694214	0.00142489	0.106905	0.148899	0.00246752	0.0199496	0.102463	0.0373217	0.407309	0.0105928	0.00422993	0.0107967	0.00112763	226560	Willow wetland (X8)	0	0.0094	0.0031	0.1162	0.0819	0.1781	0.0362	0.0531	0.2706	0.0156	0	0.2019	0.015	0.0188	0
226564	0.000947147	0.00244414	0.0851792	3.15984e-30	0.0250143	0.0277285	0.0137408	0.148425	0.0582135	0.214689	0.0448887	0.277539	0.00741358	0.0136546	5.21209e-07	226564	Peat bog (X11)	0	0	0.0125	0	0	0.0312	0.0112	0.1812	0.04	0.17	0.0006	0.5144	0.0025	0.0306	0.0056
226575	4.77179e-05	0.00637948	0.0937209	0.000171846	0.176288	0.16188	0.00282632	0.0232863	0.168619	0.0297574	0.443383	0.0167071	0.00487075	0.0110559	0.00193375	226575	Sedge wetland (X10)	0	0	0	0	0	0.0375	0	0	0.0006	0.0619	0.8994	0	0	0	0.0006
227381	0.0174598	0.00452242	0.138151	0.0178238	0.240642	0.192229	0.00226248	0.0023233	0.0508349	0.0131522	0.0338674	0.0251053	0.0100058	0.0213986	0.0399315	227381	Sparse birch forest (X4)	0.0981	0	0.2244	0.0069	0.4612	0.0569	0.0006	0	0.0125	0	0	0.1394	0	0	0
227383	0.000580556	0.0165196	0.0413596	0.000175426	0.165552	0.405003	0.00267433	0.0030077	0.210389	0.0198687	0.153673	0.0107838	0.00497817	0.00988562	0.0242522	227383	Sparse birch forest (X4)	0.045	0.0006	0.0469	0.0256	0.3675	0.21	0.0112	0.0038	0.1238	0	0	0.1612	0.0044	0	0
227384	0.000741119	0.0158962	0.0314775	0.00151041	0.156018	0.228541	0.00153711	0.00215546	0.141013	0.0171926	0.388709	0.00637328	0.0065734	0.0142042	0.0260564	227384	Forested wetland (X5)	0.0006	0.0019	0.0012	0.02	0.0681	0.3694	0.0075	0.0025	0.3531	0	0	0.1731	0.0019	0.0006	0
227388	0.01535	0.00483129	0.0767416	7.40578e-07	0.16302	0.214225	0.00189737	0.00188318	0.0651851	0.0189505	0.212643	0.0100003	0.00837452	0.0186421	0.0102284	227388	Forested wetland (X5)	0	0.0194	0.0131	0.07	0.1106	0.4244	0.0025	0.0169	0.2162	0.0312	0.0012	0.0275	0.0025	0.0512	0.0131
227389	6.36904e-06	0.0085433	0.0449226	8.09799e-07	0.0883158	0.0758558	0.00382013	0.0281556	0.117176	0.0589416	0.386906	0.0401306	0.0061917	0.0188291	0.000542104	227389	Dry lichen subsiding (X7)	0	0.03	0.0156	0.0075	0	0.0938	0.0419	0.3669	0.1519	0.0375	0.005	0.1575	0.0106	0.0644	0.0175
227390	0.000216352	0.00325408	0.0656292	4.57535e-25	0.0309233	0.0533936	0.0129997	0.103318	0.0641668	0.154551	0.0869227	0.222358	0.00715336	0.0152562	3.878e-06	227390	Peat bog (X11)	0	0	0.0106	0.0012	0.0006	0.0069	0.0619	0.1875	0.0488	0.0138	0	0.6219	0.0131	0.0331	0.0006
227401	6.71348e-06	0.0353289	0.0070792	2.26577e-16	0.0129676	0.0172099	0.00851644	0.067535	0.0438244	0.156407	0.318695	0.277454	0.0133305	0.041099	0.000108735	227401	Peat bog (X11)	0	0.0562	0	0.0138	0	0.0081	0.0019	0.1231	0.0881	0.1906	0.0012	0.4606	0.0012	0.035	0.02
227408	0.00251785	0.00251043	0.0856236	4.23834e-35	0.015097	0.0502918	0.0195704	0.156456	0.0730122	0.283947	0.0546059	0.272484	0.0052075	0.00902768	1.03298e-07	227408	Sphagnum wetland (X9)	0	0.0081	0.0181	0	0	0.0031	0	0.0788	0.0012	0.6119	0.0312	0.2394	0.0019	0.0062	0
227418	0.0252516	0.00569088	0.0532751	5.40823e-11	0.303964	0.620233	0.000692536	0.000173108	0.0241828	0.00227174	0.1121	0.000481423	0.00518262	0.00731233	0.0149565	227418	Sedge wetland (X10)	0	0.0006	0.0012	0.01	0.0319	0.4688	0	0	0.0019	0.0112	0.47	0.0025	0.0006	0.0012	0
227419	0.110516	0.00280612	0.0664882	1.34167e-10	0.38207	0.451662	0.00061509	0.000114432	0.0314552	0.00200452	0.0622785	0.000999624	0.00779534	0.0100754	0.0369433	227419	Sedge wetland (X10)	0	0.0031	0.0031	0.0088	0.0175	0.4312	0.0006	0	0.0038	0.0081	0.5238	0	0	0	0
227421	0.0197581	0.00765783	0.0239699	3.05164e-12	0.210498	0.447471	0.000593878	0.000114241	0.0101166	0.00169557	0.178249	0.0006737	0.00816068	0.0122079	0.0217771	227421	Sedge wetland (X10)	0.0012	0.0288	0	0.0062	0.1069	0.355	0.0006	0.005	0.0056	0.0944	0.365	0.0275	0	0.0019	0.0019
227422	0.0652388	0.00477607	0.0219647	3.37351e-12	0.20442	0.390337	0.000381807	3.00585e-05	0.00710774	0.00125195	0.242319	0.000432967	0.00926681	0.0155834	0.0235904	227422	Forested wetland (X5)	0.0138	0.0131	0.0069	0.0088	0.13	0.565	0	0.0006	0.0038	0.0469	0.2062	0.0025	0.0006	0.0006	0.0012
228210	7.02841e-06	0.0108468	0.0281625	3.62293e-05	0.126339	0.213448	0.00260098	0.00394714	0.179693	0.0348734	0.242987	0.0121142	0.00468381	0.014326	0.00252601	228210	Peat bog (X11)	0.0144	0	0.0138	0.0012	0.2319	0.2412	0.0206	0.0025	0.1981	0	0	0.2638	0.0125	0	0
228223	0.000883873	0.00221968	0.0779953	5.97731e-45	0.00818334	0.0320253	0.0197594	0.206101	0.114922	0.470486	0.0393189	0.181438	0.002689	0.00420644	6.38674e-10	228223	Sphagnum wetland (X9)	0	0.0094	0.0344	0	0	0	0	0.32	0	0.6031	0	0.0306	0	0.0019	0.0006
228226	4.41168e-05	0.00405843	0.0276055	5.14026e-35	0.0158601	0.014804	0.0150082	0.194001	0.0530343	0.215502	0.0449324	0.367788	0.00852824	0.014506	1.84607e-07	228226	Sphagnum wetland (X9)	0	0.0006	0	0	0	0.0106	0.0056	0.1919	0.035	0.3019	0.0125	0.2712	0.0031	0.1538	0.0138
228227	8.55225e-05	0.00156302	0.0100227	1.52141e-46	0.0143451	0.0183251	0.0240308	0.0918979	0.0469436	0.173242	0.0140482	0.613695	0.0155023	0.0196615	1.88511e-07	228227	Peat bog (X11)	0	0.0019	0	0	0	0	0.0044	0.1419	0.0138	0.0112	0	0.7688	0.0012	0.0544	0.0025
228229	0.000297357	0.00758041	0.0188429	1.47694e-29	0.0131869	0.0267338	0.0164433	0.0940225	0.045375	0.203853	0.0679605	0.42583	0.0119419	0.0242571	4.5459e-06	228229	Peat bog (X11)	0	0.0012	0.0019	0.0006	0	0.0006	0.0012	0.2862	0.01	0.1694	0	0.5	0	0.0188	0.01
228233	8.68626e-08	0.0119617	0.0288246	6.56386e-08	0.0586451	0.0586126	0.00347768	0.0278602	0.126922	0.0665432	0.415638	0.0287457	0.00353384	0.0132376	4.02802e-05	228233	Sphagnum wetland (X9)	0	0.0031	0.005	0	0	0.0731	0.0006	0.1094	0.0662	0.2506	0.1488	0.1662	0.0006	0.1675	0.0088
228238	0.000141679	0.00398872	0.048067	6.81609e-16	0.0568632	0.035679	0.00860562	0.0734286	0.0587378	0.0888795	0.164205	0.258304	0.0139782	0.0328199	0.000268177	228238	Peat bog (X11)	0	0	0.0031	0	0	0.0138	0	0.1363	0.1012	0.0494	0.0694	0.5244	0.0069	0.0888	0.0069
229036	0.0375007	0.00517671	0.140927	0.00203984	0.303683	0.0919112	0.00141608	0.00126827	0.0177598	0.00450116	0.00402071	0.0292729	0.0139969	0.0220975	0.053309	229036	Exposed rock (X2)	0.0219	0	0.3156	0.2319	0.2444	0.1862	0	0	0	0	0	0	0	0	0
229042	0.001153	0.00664513	0.0987896	1.82704e-10	0.103203	0.119632	0.0048575	0.0239848	0.104071	0.0452331	0.099322	0.0603711	0.00670796	0.0132572	0.000778956	229042	Peat bog (X11)	0	0.0188	0.04	0.0081	0.0081	0.1394	0.005	0.1162	0.1056	0.1912	0.0162	0.2375	0.0012	0.0994	0.0131
229045	0.00170969	0.00129825	0.0388431	5.79221e-32	0.0387547	0.0462746	0.015092	0.0405006	0.0928203	0.130595	0.0281948	0.404832	0.0130443	0.0206581	9.94897e-06	229045	Peat bog (X11)	0	0.0031	0.0025	0.0006	0.0056	0.0275	0.0112	0.02	0.0206	0.0231	0	0.8769	0.0006	0.0075	0.0006
229047	9.28096e-05	0.00138569	0.00764779	9.61876e-39	0.0270491	0.01195	0.0131627	0.0321089	0.0569155	0.118032	0.0223393	0.558413	0.0254461	0.0377858	5.35224e-06	229047	Peat bog (X11)	0.0006	0.0075	0.0012	0.0406	0.0081	0.3331	0.015	0.0038	0.0388	0.0194	0	0.5244	0.0025	0.005	0
229053	7.98748e-05	0.00191655	0.0592459	8.87818e-36	0.00998884	0.0548199	0.0204637	0.106577	0.0791709	0.345818	0.111131	0.227672	0.00352656	0.00894103	1.59881e-08	229053	Sphagnum wetland (X9)	0	0.0025	0	0	0	0.0038	0.0012	0.1875	0.0175	0.57	0.0088	0.1106	0	0.0856	0.0125
229072	0.179551	0.00359641	0.00915109	1.64764e-16	0.172718	0.188916	0.000434439	8.31233e-06	0.0589193	0.00359255	0.0519962	0.00176658	0.0120808	0.018897	0.022633	229072	Forested wetland (X5)	0.1971	0.0092	0.1708	0.0026	0.0953	0.2983	0	0.0046	0.0631	0.0197	0.0867	0.0368	0.0013	0.0118	0.0026
229075	0.790901	0.0055924	0.0272481	2.47209e-23	0.119116	0.06807	0.000478199	3.40312e-05	0.0896191	0.0112161	0.00479424	0.00221586	0.0068864	0.00753257	0.000191744	229075	Anthropogenic (X0)	0.5882	0.0029	0.3941	0	0	0	0	0.0029	0	0	0	0.0118	0	0	0
229873	0.00325751	0.0013539	0.0367993	2.23831e-36	0.0388104	0.0239885	0.013104	0.0648355	0.078432	0.138285	0.0177143	0.385415	0.0149018	0.0184726	3.00959e-06	229873	Peat bog (X11)	0	0.0006	0.0075	0.0344	0.0019	0.0988	0.0144	0.0238	0.0181	0.0744	0	0.7231	0.0006	0.0025	0
229875	0.000112987	0.000603678	0.00871522	7.78881e-36	0.0471211	0.0105106	0.00865587	0.0127254	0.0867802	0.101528	0.0366392	0.454969	0.0296319	0.0494538	1.65833e-05	229875	Peat bog (X11)	0	0.005	0	0.0081	0	0.2338	0.0119	0.0031	0.1112	0.0269	0	0.5925	0	0.0075	0
229880	0.00922905	0.00152586	0.112136	2.30377e-41	0.0156205	0.0610714	0.0252513	0.211553	0.0624918	0.293215	0.0263106	0.297223	0.0051423	0.00699539	2.69216e-08	229880	Dry lichen subsiding (X7)	0	0.0075	0.0019	0.0019	0	0.0094	0.0131	0.2794	0.1112	0.24	0	0.1706	0.0019	0.15	0.0131
229889	2.49468e-06	0.0101756	0.0385194	4.03039e-05	0.123559	0.0973697	0.00217562	0.0154267	0.18709	0.0390894	0.561325	0.0117974	0.00439766	0.0123822	0.000640098	229889	Sedge wetland (X10)	0	0.0012	0.0075	0	0	0.3113	0.0006	0.0038	0.0956	0.0725	0.4375	0.0088	0	0.0431	0.0181
230704	1.63218e-05	0.00152563	0.0167769	3.41971e-35	0.0271109	0.00770655	0.0135311	0.110134	0.0296861	0.127095	0.0260855	0.565603	0.0203947	0.0354952	1.47087e-06	230704	Peat bog (X11)	0	0	0.0012	0	0	0.0256	0.0081	0.1375	0.1319	0.1031	0	0.5231	0.0019	0.0675	0
230705	2.12368e-07	0.0027723	0.00654803	2.377e-39	0.0140041	0.00422888	0.0116986	0.126343	0.0378081	0.157899	0.0432068	0.471347	0.0126287	0.0238623	6.61326e-08	230705	Peat bog (X11)	0	0	0	0	0	0.0038	0.025	0.2231	0.0494	0.0231	0	0.5481	0.0069	0.1206	0
230709	8.67974e-05	0.00113627	0.035606	8.47827e-32	0.0237881	0.0430568	0.0149643	0.0442412	0.0995823	0.191808	0.102905	0.311485	0.007958	0.0183218	9.42317e-07	230709	Sphagnum wetland (X9)	0	0.0006	0	0	0	0.0169	0.0019	0.1212	0.0562	0.4225	0.0225	0.1194	0.0012	0.1881	0.0494
231520	0.00338564	0.0128271	0.0736556	0.0273265	0.259205	0.2874	0.0014124	0.00276915	0.0958668	0.0103316	0.15099	0.00491725	0.00643798	0.0112511	0.0426268	231520	Shadow (X3)	0.0031	0	0.0819	0.5181	0	0.3969	0	0	0	0	0	0	0	0	0
231531	4.45877e-05	0.00293243	0.0441046	1.14664e-29	0.0245128	0.00947384	0.0110529	0.195644	0.038881	0.18163	0.0548118	0.349916	0.0105971	0.0207876	5.53593e-07	231531	Peat bog (X11)	0	0	0.0069	0.0006	0	0.0319	0.0038	0.275	0.0394	0.1719	0	0.425	0.0006	0.0419	0.0031
231534	1.65683e-05	0.00503846	0.0275235	3.05713e-18	0.0392134	0.0168167	0.0083723	0.0923876	0.0488579	0.11057	0.164866	0.303861	0.0146475	0.0371682	6.65384e-05	231534	Willow wetland (X8)	0	0	0	0.005	0	0.1356	0.0019	0.0131	0.4269	0.0881	0.0062	0.2156	0	0.1069	0.0006
231547	0.70391	0.0174637	0.022147	2.27747e-19	0.0602808	0.0660809	0.000461752	4.6651e-05	0.0197483	0.00860687	0.0125729	0.00184978	0.00699456	0.00979534	0.000240738	231547	Anthropogenic (X0)	0.6857	0.0118	0.1238	0	0	0.0727	0.002	0.002	0.0275	0.0039	0	0.0668	0.0039	0	0
232348	2.59889e-06	0.0211139	0.0127192	2.4099e-05	0.124336	0.275042	0.00229498	0.00217307	0.188754	0.0273424	0.192251	0.0080427	0.00476629	0.0138807	0.00626809	232348	Forested wetland (X5)	0.0056	0	0.2294	0.3125	0.0231	0.4294	0	0	0	0	0	0	0	0	0
232358	0.00330357	0.00157706	0.0882112	1.25562e-36	0.0214791	0.0419425	0.0182717	0.14296	0.0835827	0.247137	0.0350184	0.299912	0.00632759	0.00953895	1.39335e-07	232358	Peat bog (X11)	0	0.0038	0.0019	0.0019	0	0.03	0.0062	0.2388	0.0619	0.1256	0	0.4762	0.0006	0.0506	0.0025
232370	0.681426	0.0309191	0.0738969	6.76296e-22	0.0478347	0.091836	0.00173162	0.00202592	0.018942	0.0161818	0.00411951	0.0102577	0.00509017	0.00491086	4.43343e-05	232370	Anthropogenic (X0)	0.6639	0.0082	0.099	0.001	0.0021	0.0175	0.0031	0.0165	0.0412	0.0711	0.0052	0.0237	0.0021	0.0289	0.0165
232372	0.624822	0.0472285	0.0733862	1.43535e-09	0.0394391	0.115008	0.00155486	0.00125252	0.019607	0.0243308	0.0357775	0.00926786	0.00572411	0.0106743	0.000798827	232372	Exposed rock (X2)	0.3701	0.013	0.4416	0	0	0.0519	0	0.013	0.0195	0.026	0	0.0649	0	0	0
233182	0.00116346	0.00294249	0.0434588	1.40292e-10	0.0899163	0.129676	0.00314937	0.00341834	0.082607	0.0553952	0.423991	0.02489	0.00967965	0.0308328	0.00168871	233182	Forested wetland (X5)	0	0.0062	0.0038	0.0212	0.0031	0.4712	0.0069	0.0175	0.2431	0.01	0	0.1919	0.0038	0.0188	0.0025
233183	4.61278e-05	0.0048564	0.059036	1.06736e-12	0.0709718	0.0570082	0.00638961	0.0566878	0.088616	0.0798114	0.237834	0.112496	0.00850213	0.0216895	0.000210841	233183	Peat bog (X11)	0	0.0081	0.0138	0.0531	0.0075	0.1594	0.0119	0.0344	0.1194	0.0181	0	0.5606	0.0025	0.0094	0.0019
233195	0.783958	0.0110466	0.0461705	8.55199e-32	0.0486734	0.0549859	0.00101467	0.000488689	0.0356579	0.0223671	0.00328835	0.00370499	0.0045108	0.0038887	2.2172e-06	233195	Anthropogenic (X0)	0.8478	0	0.0736	0	0	0.0134	0	0.005	0.01	0.0033	0	0.0452	0	0.0017	0
234008	0.0093556	0.00936292	0.043838	6.90067e-07	0.235151	0.417127	0.001119	0.000418729	0.0721453	0.00824326	0.085015	0.00218113	0.00619095	0.0113671	0.0267491	234008	Forested wetland (X5)	0.0012	0.0019	0.0075	0.0656	0.3131	0.5638	0.0019	0.0006	0.0331	0.0006	0	0.01	0.0006	0	0
234014	0.0256527	0.0132781	0.0944613	4.58796e-15	0.0151387	0.108519	0.0119015	0.0337763	0.039915	0.184959	0.129865	0.178986	0.00618378	0.0189067	4.53925e-05	234014	Peat bog (X11)	0	0.0106	0	0.0131	0.0056	0.2638	0.0019	0.0831	0.1288	0.0744	0	0.3369	0.0006	0.08	0.0012
234019	0.769473	0.00652134	0.0534247	2.21776e-34	0.0575517	0.0558395	0.00102923	0.000502423	0.066501	0.0297142	0.00321264	0.00320102	0.00386912	0.0031543	8.24675e-07	234019	Anthropogenic (X0)	0.8478	0	0.0353	0	0.0096	0.0128	0	0.0016	0.0016	0	0	0.0881	0.0032	0	0
234020	0.789955	0.00785925	0.0373788	4.47721e-25	0.0641604	0.079931	0.000707103	0.000102493	0.0482656	0.0178961	0.00968529	0.00237391	0.00521348	0.00639677	2.7625e-05	234020	Anthropogenic (X0)	0.7257	0	0.0885	0	0.0088	0.0133	0.0088	0.0044	0.0841	0	0	0.0619	0.0044	0	0
234838	0.210785	0.00809214	0.106194	4.76361e-11	0.0492994	0.149969	0.00345707	0.00324832	0.0694467	0.0671283	0.132926	0.0283502	0.00612076	0.0152747	0.000504763	234838	Peat bog (X11)	0.0019	0.0644	0.0062	0.0025	0.0081	0.27	0.0031	0.06	0.0281	0.0969	0	0.4412	0	0.0175	0
234841	0.351117	0.023898	0.111023	2.37169e-13	0.0367257	0.202846	0.00257944	0.00187576	0.00961657	0.0172495	0.0219462	0.0139384	0.00462634	0.00855718	0.000185541	234841	Anthropogenic (X0)	0.5036	0.0021	0.0021	0.0021	0.0521	0.3186	0.0029	0.0007	0.0436	0.0043	0	0.0636	0	0.0043	0
235660	0.0923258	0.00211071	0.139883	0.000222922	0.386621	0.234963	0.00105904	0.000356828	0.0434026	0.00444819	0.0218745	0.00767123	0.0105518	0.0178951	0.0723399	235660	Forested wetland (X5)	0.0023	0	0.1318	0.4205	0.0068	0.4386	0	0	0	0	0	0	0	0	0
235667	0.823063	0.0258732	0.0507551	1.02058e-22	0.0679664	0.0618205	0.000930401	0.000551648	0.0257477	0.0112311	0.00253046	0.00554588	0.00603368	0.00512213	7.796e-05	235667	Anthropogenic (X0)	0.9627	0	0.0085	0	0.0271	0.0017	0	0	0	0	0	0	0	0	0
236492	0.752357	0.0158918	0.0272198	1.10574e-31	0.0403001	0.045637	0.000681593	0.000210165	0.0204827	0.0156776	0.00431004	0.00208843	0.00491202	0.00449236	2.61368e-06	236492	Anthropogenic (X0)	1	0	0	0	0	0	0	0	0	0	0	0	0	0	0
	37.1908	27.8953	12.2923	1.12632	58.7516	48.7763	1.56321	5.11564	41.5599	41.2022	37.6768	30.0435	5.29305	13.7463	15.2665			35.8695	32.179	10.8482	9.0895	46.0093	41.0067	1.8706	9.0427	43.5635	49.1713	33.0086	46.3513	7.8197	18.955	35.2137
[truncated: 8 more columns]

## Sheet: Mixedpixel_classif_forDoreen
No	Ground class (reference)	Mapped class proportion per pixel
		X0	X1	X2	X3	X4	X5	X6	X7	X8	X9	X10	X11	X12	X13	X14
153325	Sparse birch forest (X4)	0.00160813	0.0103515	0.00240323	1.79018e-17	0.166297	0.31086	0.000468289	2.04463e-05	0.00461437	0.000759842	0.116803	0.000999427	0.0193198	0.0278557	0.110126
153326	Sparse birch forest (X4)	0.00530545	0.000415845	0.00620976	8.72086e-12	0.398879	0.10035	0.000233142	6.70334e-07	0.0243431	0.00114926	0.0183774	0.00231715	0.0285618	0.0722818	0.216232
154154	Sparse birch forest (X4)	0.0159602	0.00101988	0.00545682	1.23357e-12	0.433842	0.0731115	0.000251205	1.93859e-06	0.0478299	0.00125385	0.00912095	0.00346118	0.0318708	0.0525786	0.374422
154155	Sparse birch forest (X4)	0.065367	0.00115714	0.0241173	1.05798e-08	0.407414	0.14163	0.000359414	6.33328e-06	0.0460192	0.00271968	0.0102852	0.00243835	0.0170399	0.0348609	0.129602
154980	Dwarf shrub subsiding (X14)	0.00530806	0.000881457	0.00448551	4.9191e-15	0.40424	0.0746149	0.00024534	2.38903e-06	0.0281621	0.00101287	0.0177709	0.00258375	0.0318194	0.0527562	0.209538
154981	Dwarf shrub subsiding (X14)	0.00966862	0.0021864	0.00552587	4.30112e-13	0.323764	0.152414	0.00029061	4.24353e-06	0.0182351	0.00106615	0.0318938	0.00152846	0.0229482	0.0393426	0.209045
154985	Dwarf shrub subsiding (X14)	0.0245042	0.00189073	0.0244551	7.98214e-07	0.468999	0.131484	0.000525767	3.31441e-05	0.0566528	0.0023888	0.0108588	0.00585157	0.0214554	0.0344382	0.397452
155807	Dwarf shrub subsiding (X14)	0.00413054	0.00134236	0.00449904	1.0754e-14	0.344192	0.104031	0.000334816	4.96548e-06	0.0247289	0.00115446	0.0290554	0.00309927	0.029251	0.0486855	0.220345
155808	Sparse birch forest (X4)	0.0128251	0.00253435	0.00572838	2.99863e-14	0.308375	0.112461	0.000337153	9.87942e-06	0.0276376	0.00147438	0.0395575	0.0022811	0.024034	0.0359386	0.165137
155813	Sparse birch forest (X4)	0.0192159	0.00172866	0.0205683	4.23158e-08	0.473464	0.099586	0.000527141	3.36992e-05	0.069798	0.00278415	0.008338	0.00719873	0.0236971	0.0368512	0.353302
155814	Sparse birch forest (X4)	0.0766445	0.00240969	0.0432547	1.6097e-08	0.522068	0.166406	0.000521101	6.42054e-05	0.0431258	0.00150814	0.00529983	0.00437982	0.0170905	0.019381	0.26451
156633	Dwarf shrub subsiding (X14)	0.000936376	0.000477164	0.00249581	3.8963e-20	0.34117	0.0588919	0.000310269	2.27104e-06	0.0284538	0.00120758	0.025836	0.00424573	0.0372132	0.0654566	0.0807556
156634	Dwarf shrub subsiding (X14)	0.00645286	0.00105104	0.00583724	5.7145e-15	0.346258	0.0990846	0.000352661	6.8322e-06	0.0232665	0.00113859	0.0429159	0.00350221	0.0297419	0.0480983	0.188892
156635	Dwarf shrub subsiding (X14)	0.00365037	0.000861574	0.00335987	1.49102e-14	0.390392	0.0653119	0.000258566	1.84289e-06	0.0306195	0.00106904	0.0162898	0.0036776	0.0373191	0.0660331	0.315185
156638	Dwarf shrub subsiding (X14)	0.0434015	0.00132236	0.03415	3.06793e-07	0.450222	0.225795	0.0006289	2.6034e-05	0.0600083	0.00273909	0.0136696	0.00488787	0.0168666	0.0300977	0.289983
156639	Dwarf shrub subsiding (X14)	0.0274765	0.00217687	0.033817	8.62616e-08	0.386613	0.217441	0.00103285	0.000158233	0.0822446	0.00404814	0.0359244	0.0101128	0.0173708	0.026636	0.296384
156642	Sparse birch forest (X4)	0.0225218	0.0045741	0.0207038	1.18309e-05	0.500386	0.0831613	0.00046461	5.28345e-05	0.0925424	0.00369125	0.0033126	0.00553896	0.0214499	0.0304902	0.43476
156644	Sparse birch forest (X4)	0.122909	0.00281141	0.104641	1.89922e-05	0.356722	0.118519	0.000609045	0.000128181	0.00871807	0.00126031	0.00666618	0.00743625	0.0143938	0.0208842	0.0715081
157461	Sparse birch forest (X4)	0.00609877	0.00123377	0.00368987	6.63847e-18	0.364627	0.102061	0.00027813	3.15885e-06	0.0253235	0.000938554	0.0181619	0.00215524	0.0287249	0.0409622	0.14532
157462	Sparse birch forest (X4)	0.00292179	0.00063888	0.00248835	4.27626e-19	0.394248	0.050271	0.000203359	1.40834e-06	0.0295372	0.000805856	0.019628	0.00257994	0.0376312	0.0562708	0.138674
157465	Dwarf shrub subsiding (X14)	0.0039225	0.000388182	0.00620981	3.44572e-12	0.424078	0.0845888	0.000279342	1.24732e-06	0.0292277	0.00108942	0.0186676	0.00411485	0.0332704	0.0741219	0.294361
157466	Dwarf shrub subsiding (X14)	0.0156278	0.000213476	0.0157851	6.27484e-11	0.504656	0.0664202	0.000331126	2.27539e-06	0.0552021	0.00163857	0.0107661	0.00739342	0.031549	0.0671643	0.240426
157469	Sparse birch forest (X4)	0.0138491	0.00195097	0.0136475	1.30911e-09	0.313992	0.12789	0.000747657	5.33233e-05	0.0458769	0.00351362	0.0533792	0.00914784	0.0257158	0.0466057	0.308254
157475	Sparse birch forest (X4)	0.00206232	0.0363764	0.0132202	7.64489e-09	0.513097	0.0419756	0.000350518	0.000510684	0.0908097	0.00223935	0.00134367	0.00298239	0.0152477	0.0104468	0.148583
157476	Sparse birch forest (X4)	0.04661	0.0203994	0.0185172	2.52409e-07	0.473616	0.0459975	0.000287347	0.000154147	0.0515836	0.00195888	0.00257391	0.0026058	0.0189365	0.0158526	0.26547
158289	Sparse birch forest (X4)	0.159463	0.00300279	0.0178362	2.81507e-11	0.522848	0.0582664	0.000211605	1.5781e-05	0.0417163	0.00109608	0.00460094	0.00198016	0.0233396	0.0227537	0.236258
158297	Dry lichen subsiding (X7)	0.00368654	0.000625881	0.00329386	7.15827e-19	0.206972	0.0267166	0.00061786	1.18663e-05	0.0582886	0.00795217	0.0439413	0.0174146	0.046002	0.103942	0.0468103
158298	Sparse birch forest (X4)	0.0375581	0.000684314	0.0173641	1.96878e-10	0.439988	0.127855	0.000316452	4.13756e-06	0.0418942	0.00170759	0.017663	0.00258896	0.0210506	0.0405045	0.177276
158300	Dwarf shrub subsiding (X14)	0.0131764	0.00578682	0.0350101	2.95543e-05	0.316292	0.294248	0.00155952	0.000439486	0.137507	0.0076386	0.0371317	0.012858	0.0124846	0.0202175	0.294823
158302	Dwarf shrub subsiding (X14)	0.188858	0.00356928	0.0436422	0.000255211	0.47128	0.0785385	0.000344592	3.34555e-05	0.0782507	0.00418463	0.00457241	0.00305611	0.0162953	0.0257285	0.208385
159117	Sparse birch forest (X4)	0.557595	0.000263214	0.0348883	2.61612e-31	0.458434	0.00491588	9.68621e-05	4.43634e-06	0.05717	0.00286007	0.000334333	0.00103062	0.0150078	0.0115601	2.51268e-05
159125	Willow wetland (X8)	0.039023	0.000123756	0.00111549	3.5513e-49	0.0393217	0.00680656	0.00186109	2.2135e-05	0.427241	0.187733	0.0345888	0.0710853	0.0371802	0.0669841	4.82198e-06
159127	Dwarf shrub subsiding (X14)	0.00600206	0.000279361	0.00915515	5.48069e-11	0.390679	0.0753378	0.000307504	1.24909e-06	0.0319223	0.00174118	0.0212248	0.00496699	0.0308406	0.083861	0.184277
159128	Dwarf shrub subsiding (X14)	0.044994	0.000441345	0.0394861	6.04611e-09	0.451996	0.2009	0.000545405	1.11645e-05	0.0536246	0.00259078	0.0225305	0.00449933	0.0172201	0.0365442	0.141396
159135	Sparse birch forest (X4)	0.195459	0.0147872	0.0461211	3.32215e-05	0.453538	0.0591701	0.000287098	0.000143718	0.0367931	0.00213672	0.002918	0.00207306	0.0141871	0.0138168	0.137604
159137	Willow wetland (X8)	0.129846	0.0296849	0.0532518	0.000218805	0.378203	0.103906	0.000429142	0.000512374	0.0255833	0.00226159	0.00624627	0.00215144	0.0115377	0.0108599	0.129641
159945	Anthropogenic (X0)	0.258342	0.00219298	0.0170875	2.8167e-22	0.442247	0.00590413	0.000169537	4.02514e-05	0.0533306	0.00228211	0.00090695	0.00373208	0.0268591	0.0176381	0.00354558
159956	Sparse birch forest (X4)	0.00111498	0.000262458	0.00363311	3.35536e-15	0.337221	0.0357546	0.000367738	1.71656e-06	0.034771	0.00197578	0.0221143	0.0120604	0.047626	0.117303	0.169596
159959	Dwarf shrub subsiding (X14)	0.0170901	0.00110262	0.0113816	4.5146e-12	0.438466	0.0551726	0.000424528	1.58195e-05	0.0585069	0.00240856	0.00890673	0.00817905	0.032061	0.0487559	0.252229
159961	Dwarf shrub subsiding (X14)	0.0406797	0.00421886	0.0258868	6.20924e-06	0.329321	0.259529	0.00103935	9.38307e-05	0.103596	0.00526398	0.023706	0.00920853	0.0154094	0.026146	0.404914
159964	Dwarf shrub subsiding (X14)	0.0150471	0.0344228	0.0145877	1.15637e-06	0.154169	0.631796	0.00156623	0.000195523	0.114291	0.00825513	0.0562914	0.00320125	0.00628571	0.0107078	0.174248
159965	Dwarf shrub subsiding (X14)	0.031012	0.00858897	0.0180516	1.34935e-07	0.460273	0.0516746	0.000337677	4.99618e-05	0.0688476	0.00376805	0.00134577	0.00329978	0.0191705	0.0241354	0.179738
159966	Sparse birch forest (X4)	0.0982252	0.00387089	0.0542694	8.23359e-08	0.420644	0.174067	0.000491288	8.71248e-05	0.0266941	0.00180765	0.00906946	0.00268008	0.0128245	0.0162208	0.0992079
160778	Sparse birch forest (X4)	0.0901219	0.000976684	0.0252912	1.11571e-13	0.41192	0.0770214	0.000275075	1.14548e-05	0.0306164	0.00156441	0.0145313	0.00208955	0.0180754	0.0254838	0.0349993
160788	Sparse birch forest (X4)	0.0205014	0.000191416	0.0422044	1.65504e-10	0.535995	0.0829065	0.00085838	2.98424e-05	0.0884535	0.00276197	0.00905119	0.0328905	0.0306671	0.0536339	0.25025
160789	Sparse birch forest (X4)	0.00925731	0.00024731	0.0193103	1.03024e-14	0.51249	0.0583672	0.000707138	2.2715e-05	0.0717404	0.00201502	0.00703471	0.0282755	0.0369942	0.0538975	0.19758
160790	Dwarf shrub subsiding (X14)	0.00593055	0.000418352	0.00774649	6.50903e-11	0.419644	0.0499338	0.000284169	1.94729e-06	0.034242	0.00146607	0.0148003	0.00633435	0.0364941	0.0813963	0.280644
160795	Sparse birch forest (X4)	0.00728517	0.00835217	0.0251094	6.37646e-07	0.446885	0.113467	0.000438036	7.93433e-05	0.0852945	0.00490927	0.00242857	0.00210037	0.0114993	0.0168062	0.0745479
161617	Sparse birch forest (X4)	0.0101192	0.00102783	0.00924992	1.76368e-19	0.142114	0.0497505	0.00141161	0.000130861	0.108644	0.0243974	0.0825649	0.0263598	0.0254094	0.0552053	0.00742968
162433	Anthropogenic (X0)	0.887509	0.00725229	0.0438999	3.68141e-80	0.0517439	0.000612833	0.000111775	0.00204547	0.00257602	0.00913431	4.22687e-06	5.96286e-05	0.00200895	0.000204493	2.85155e-14
162434	Anthropogenic (X0)	0.839583	0.000314758	0.0186814	2.82092e-55	0.569193	0.00056599	5.41781e-05	1.34635e-05	0.120816	0.00273447	4.23998e-06	0.000606675	0.0151293	0.00269923	6.99038e-08
162437	Dwarf shrub subsiding (X14)	0.000269004	0.000181791	0.000466388	4.60295e-42	0.102945	0.000319604	0.000339358	5.68178e-06	0.0657414	0.0244631	0.00225179	0.0550673	0.0947075	0.159469	2.70816e-05
162449	Dwarf shrub subsiding (X14)	0.0255231	0.00107752	0.0284797	2.90068e-08	0.422263	0.179191	0.00067947	2.7089e-05	0.0649097	0.00330376	0.0157765	0.00677974	0.0188292	0.0356029	0.235424
163261	Anthropogenic (X0)	0.84912	0.0027832	0.0945017	4.12337e-73	0.100629	0.00224574	0.00020456	0.00241871	0.00380776	0.00538771	5.91146e-06	0.000168089	0.00222596	0.000257614	7.54111e-13
163265	Dwarf shrub subsiding (X14)	0.152495	0.00173642	0.0564779	6.07899e-09	0.480104	0.0844453	0.000384285	4.31665e-05	0.0290429	0.00143684	0.00474917	0.00437968	0.0173417	0.021033	0.0973784
163267	Sparse birch forest (X4)	0.00506144	0.000428501	0.00577653	4.60122e-22	0.254631	0.0101775	0.000691157	3.56787e-05	0.108036	0.0129573	0.0115614	0.0350066	0.0464723	0.0827337	0.00951855
163268	Dry lichen subsiding (X7)	0.01716	0.000603733	0.00348636	1.19726e-34	0.0566613	0.0354552	0.0025758	0.000116698	0.209877	0.07456	0.0594579	0.0578879	0.0250285	0.0472507	0.000172746
163281	Sparse birch forest (X4)	0.14685	0.00652187	0.061858	7.06726e-05	0.413424	0.167681	0.000592354	0.000258842	0.0266395	0.0017125	0.0192653	0.00432126	0.0148643	0.0168167	0.284445
163282	Willow wetland (X8)	0.208585	0.000171944	0.0380421	1.15292e-11	0.476475	0.0882143	0.000172834	3.37472e-07	0.0437726	0.00308097	0.00227012	0.00100945	0.0147286	0.0435826	0.0127979
164090	Anthropogenic (X0)	0.936816	0.00528407	0.0490642	1.16439e-74	0.112575	0.000544816	0.000100899	0.00137875	0.00614983	0.00642327	2.09679e-06	0.000116249	0.00306944	0.000280796	7.70815e-13
164093	Sparse birch forest (X4)	0.627987	0.00564433	0.117117	0.00025878	0.609584	0.126244	0.000327063	0.000142756	0.0499297	0.00128691	0.00312942	0.00216621	0.0126682	0.0102684	0.277629
164094	Dwarf shrub subsiding (X14)	0.273346	0.00502056	0.0835937	1.27318e-06	0.476218	0.145364	0.000470445	0.00017097	0.0314209	0.00166448	0.00621954	0.00303468	0.0127638	0.0129127	0.131315
164106	Dwarf shrub subsiding (X14)	0.0167955	0.00110977	0.0228178	1.88969e-12	0.426886	0.118696	0.000709194	8.17684e-05	0.0478687	0.0018758	0.0280592	0.0101271	0.0240181	0.0305018	0.192938
164107	Dwarf shrub subsiding (X14)	0.00939206	0.00208208	0.0197464	3.18761e-13	0.41951	0.189403	0.0010449	0.000281233	0.0462248	0.00161763	0.0407892	0.0124428	0.0236851	0.0239743	0.316712
164108	Sparse birch forest (X4)	0.0082279	0.00317136	0.0222997	3.45032e-09	0.299653	0.241712	0.000966801	0.000210687	0.0263404	0.00214245	0.119627	0.00690754	0.0179834	0.0271967	0.233025
164109	Dwarf shrub subsiding (X14)	0.0199178	0.0013212	0.0171005	1.80184e-09	0.419008	0.143427	0.000381524	8.97031e-06	0.0369763	0.00196472	0.013362	0.00275737	0.0195558	0.036475	0.188942
164919	Anthropogenic (X0)	0.895755	0.00257779	0.0411033	1.82395e-73	0.0278406	0.0525173	0.000618092	0.00043406	0.009834	0.0111754	0.000181394	0.000167896	0.0011575	0.000253002	2.14997e-12
164921	Anthropogenic (X0)	0.491196	0.000959087	0.0341003	1.93203e-10	0.520472	0.00946871	0.000114213	3.89561e-06	0.0560832	0.00234306	0.0011987	0.00257634	0.0252118	0.0345504	0.0327803
164922	Sparse birch forest (X4)	0.343133	0.00343522	0.0580692	6.03987e-06	0.555132	0.0807387	0.000244189	2.72889e-05	0.0534922	0.00189069	0.00237898	0.00174284	0.0146068	0.0170394	0.156509
164923	Dwarf shrub subsiding (X14)	0.234368	0.0149808	0.0618615	2.50828e-06	0.488853	0.140688	0.000335618	0.000269495	0.036901	0.00142648	0.00745386	0.00126367	0.0106437	0.00837354	0.13921
164924	Sparse birch forest (X4)	0.425923	0.0037629	0.0369524	4.26423e-08	0.436635	0.0934692	0.000192477	1.15224e-05	0.0297933	0.00185349	0.00629469	0.000790646	0.0138552	0.0189714	0.0773254
164926	Dwarf shrub subsiding (X14)	0.0335829	0.0116639	0.0663271	3.26731e-06	0.431114	0.0627012	0.000431743	0.000417976	0.0453522	0.00301665	0.00289014	0.0032342	0.0104859	0.010775	0.0319755
164933	Willow wetland (X8)	0.00190722	0.00255378	0.00271338	3.77929e-20	0.201726	0.206307	0.000504264	8.68417e-06	0.019023	0.00181696	0.0580329	0.00191288	0.0204624	0.0345998	0.0430222
164935	Dwarf shrub subsiding (X14)	0.0022265	0.00162103	0.00528416	2.02909e-15	0.257034	0.166012	0.000645224	1.56231e-05	0.0283345	0.00251956	0.0482879	0.00474864	0.0240663	0.0464817	0.11353
164936	Dwarf shrub subsiding (X14)	0.00536264	0.000334565	0.00814965	3.20031e-11	0.427749	0.0654908	0.000299164	1.45242e-06	0.0392717	0.00169646	0.0133096	0.00541982	0.0330597	0.0803023	0.237658
164937	Willow wetland (X8)	0.00848287	0.000478532	0.00862354	2.10662e-10	0.428649	0.111825	0.000263249	1.33118e-06	0.0270653	0.00108238	0.0226261	0.00277717	0.0280202	0.0638425	0.310657
164938	Willow wetland (X8)	0.00824075	0.000284922	0.00773339	2.89696e-10	0.405965	0.0458	0.000187499	3.74831e-07	0.0299427	0.00171832	0.00828903	0.00309815	0.0313864	0.0941455	0.143274
165754	Anthropogenic (X0)	0.582823	0.00321205	0.0474235	7.21843e-23	0.359246	0.00269661	0.000149805	6.89157e-05	0.0234308	0.0031381	0.000140475	0.0034342	0.0180947	0.0118865	0.000164576
165756	Anthropogenic (X0)	0.38066	0.00193707	0.0993026	3.27359e-08	0.319626	0.0283916	0.00027535	3.52858e-05	0.0157324	0.003141	0.00349424	0.00336466	0.0132861	0.0226317	0.00530602
165760	Dwarf shrub subsiding (X14)	0.0319386	0.00797603	0.0382393	1.90753e-07	0.530976	0.0880669	0.000359968	0.000129202	0.0767581	0.00248446	0.00226093	0.00226433	0.0125641	0.0124144	0.105979
165762	Willow wetland (X8)	0.00885755	0.00367393	0.0100567	8.42592e-16	0.325191	0.24033	0.000473847	3.42135e-05	0.0220374	0.00144198	0.0307546	0.00142456	0.0152607	0.0192199	0.062746
165763	Dwarf shrub subsiding (X14)	0.00205114	0.000851817	0.00370179	1.43825e-14	0.358816	0.111533	0.000272434	1.50241e-06	0.0205729	0.00102662	0.0205532	0.00221968	0.029121	0.0597303	0.196628
167407	Anthropogenic (X0)	0.700432	0.00305642	0.0855508	7.40782e-09	0.511486	0.0404862	0.000180788	4.26593e-05	0.0477351	0.00196393	0.00405907	0.00127219	0.0128211	0.0124112	0.0264194
167408	Anthropogenic (X0)	0.648329	0.00472163	0.0362999	1.48622e-11	0.537978	0.00421929	0.000118702	3.22449e-05	0.0445357	0.00176769	0.000282325	0.0041257	0.0284823	0.0207376	0.0362127
167411	Anthropogenic (X0)	0.295864	0.00134573	0.148903	9.96672e-08	0.3333	0.126005	0.000618803	0.000116409	0.0359364	0.00481025	0.0176794	0.00420547	0.00946631	0.0167811	0.00933872
167419	Dwarf shrub subsiding (X14)	0.0162519	0.0404089	0.025544	4.09203e-07	0.41887	0.0692952	0.000334084	0.00048006	0.04181	0.00210553	0.00373128	0.00159268	0.0114651	0.00908884	0.0842597
167420	Dwarf shrub subsiding (X14)	2.90829e-07	0.024897	0.00181387	2.98702e-19	0.318487	0.0303124	0.000370145	0.000292562	0.119009	0.00433209	0.00338595	0.00154721	0.00933239	0.00987357	0.00129999
168242	Sparse birch forest (X4)	0.39766	0.00875858	0.0755783	0.000525902	0.34143	0.152972	0.00057836	0.000385849	0.0511227	0.0037282	0.054437	0.00323771	0.0118132	0.0143662	0.163499
172897	Sparse birch forest (X4)	1.55425e-34	0.481961	1.31776e-12	1.24209e-76	0.107894	0.0755023	0.000349586	1.5363e-14	0.0360485	0.00897251	2.16961e-19	0.000258787	0.0089688	0.212488	2.3447e-08
172906	Sparse birch forest (X4)	9.92e-20	0.444507	8.36273e-07	5.88293e-27	0.0170103	0.00243505	0.000201455	5.91988e-07	0.161974	0.0666466	8.37767e-06	0.000509993	0.0022731	0.0274181	3.93082e-08
173731	Sphagnum wetland (X9)	9.64623e-05	0.00943932	0.00776572	9.16251e-16	0.048128	0.414161	0.00259007	0.000385208	0.123438	0.0526405	0.406909	0.00415386	0.00459982	0.0164801	0.000524018
173732	Sphagnum wetland (X9)	4.00726e-06	0.008188	0.00360433	1.96969e-16	0.0351551	0.282916	0.0030098	0.000261329	0.284254	0.110139	0.37965	0.00784089	0.00428612	0.0207607	0.00019533
173741	Water bodies (X1)	0.000140568	0.039151	0.00468423	2.33895e-11	0.0335829	0.222718	0.00127778	0.000143136	0.168578	0.0783684	0.248083	0.00195103	0.00372568	0.0154589	0.000427243
174558	Sparse birch forest (X4)	0.000656639	0.0042757	0.00643564	4.74153e-15	0.200132	0.342518	0.000556571	1.30686e-05	0.0194717	0.00415369	0.0284774	0.000760404	0.00986756	0.0248506	0.0104652
174566	Sedge wetland (X10)	2.96489e-07	0.0301372	0.00212843	1.33813e-16	0.0142924	0.0489423	0.00241467	0.000982632	0.214572	0.204438	0.400765	0.0117655	0.00402046	0.0217144	1.1978e-05
174569	Forested wetland (X5)	0.00712981	0.012788	0.00411431	1.30102e-16	0.0697607	0.458049	0.00114455	3.32799e-05	0.0629618	0.0116848	0.190779	0.00191047	0.00790209	0.0184908	0.0110228
175388	Sphagnum wetland (X9)	0.00166927	0.0235689	0.00993849	3.42323e-12	0.0315436	0.207342	0.00259594	0.000457366	0.120171	0.0870928	0.168096	0.010416	0.00572407	0.0207379	0.000893461
176209	Water bodies (X1)	8.76272e-24	0.480794	2.7453e-08	6.56556e-36	0.209314	8.81295e-05	3.24169e-05	9.29645e-09	0.0221848	0.0018332	4.5441e-11	0.000740872	0.0162561	0.0759656	1.01492e-06
176210	Water bodies (X1)	1.18239e-18	0.702446	1.27779e-06	1.18838e-16	0.191966	2.15742e-05	2.52548e-05	1.29569e-06	0.0101614	0.000832988	2.86725e-08	0.0027027	0.0231125	0.0582041	5.79772e-05
176213	Sparse birch forest (X4)	6.43053e-25	0.444694	8.71475e-09	9.86231e-37	0.258123	5.07933e-05	2.31327e-05	1.3172e-09	0.0258562	0.00162021	4.39964e-12	0.000807446	0.0223034	0.120476	1.85267e-06
176230	Willow wetland (X8)	0.000188877	0.024179	0.00342599	2.42713e-17	0.0225958	0.0634487	0.001622	0.000329356	0.24044	0.168352	0.273061	0.00659279	0.00569165	0.021797	8.32119e-05
177047	Sphagnum wetland (X9)	2.32707e-07	0.0212861	0.00748153	2.82882e-15	0.0145063	0.0646363	0.00517307	0.00663462	0.14776	0.188147	0.324059	0.0414333	0.00338295	0.0170027	6.48543e-06
177882	Forested wetland (X5)	0.00342288	0.00250373	0.0254583	8.40939e-16	0.146215	0.447051	0.00342172	0.000437861	0.231746	0.0297898	0.0653939	0.015577	0.00713087	0.0154072	0.00534351
177887	Willow wetland (X8)	4.94469e-06	0.00920748	0.00298759	3.8064e-25	0.0299291	0.0214276	0.00186327	0.000414811	0.366585	0.200028	0.0263993	0.0160063	0.0052263	0.0171059	3.31579e-06
177888	Willow wetland (X8)	5.16001e-09	0.142177	0.000434278	1.38528e-12	0.0303954	0.0113184	0.000469001	4.64029e-05	0.270232	0.116828	0.00545919	0.00202425	0.00368257	0.0198377	1.77961e-05
177890	Forested wetland (X5)	5.68291e-21	0.53811	2.12734e-07	9.36485e-33	0.0213178	0.00821635	0.000375162	9.49968e-08	0.0510467	0.0328879	3.60362e-08	0.00102384	0.00338112	0.0398278	1.60068e-07
178689	Water bodies (X1)	1.27477e-11	0.391177	7.48045e-05	3.79294e-15	0.0838548	0.022771	0.000282124	4.14826e-06	0.0766332	0.00947526	7.96928e-06	0.001057	0.00407648	0.0134938	0.00013429
178700	Water bodies (X1)	1.03307e-18	0.404294	7.05481e-07	2.83279e-26	0.267916	0.000310684	5.7184e-05	9.60459e-08	0.0360446	0.00344855	6.49995e-10	0.00116206	0.0160834	0.0578046	2.43128e-05
178703	Sphagnum wetland (X9)	0.00333647	0.00672287	0.0463876	6.86342e-17	0.0344405	0.148274	0.00834402	0.0116777	0.15282	0.149853	0.145033	0.0936003	0.00625926	0.0167155	0.0001301
178710	Willow wetland (X8)	1.39373e-05	0.00462617	0.0079595	1.15952e-19	0.0401143	0.284917	0.00546385	0.000899427	0.265804	0.120341	0.175135	0.0241082	0.00477316	0.0181968	0.000106581
179522	Water bodies (X1)	1.07756e-20	0.529149	1.36984e-07	2.53182e-29	0.244188	8.56494e-05	2.75065e-05	1.85237e-08	0.0206691	0.00190083	1.10961e-10	0.000769651	0.0191181	0.0730457	7.95685e-06
179528	Forested wetland (X5)	4.80507e-26	0.539919	9.54052e-09	1.31653e-35	0.15315	2.69499e-05	2.43233e-05	9.15198e-09	0.0295315	0.00246932	1.09773e-10	0.000771314	0.0152941	0.0946908	2.22732e-07
179533	Sphagnum wetland (X9)	1.14261e-06	0.00672253	0.0207052	1.03612e-14	0.021636	0.0483718	0.0066701	0.0139784	0.17613	0.225624	0.329107	0.0911388	0.00423726	0.0207767	7.16072e-06
179545	Willow wetland (X8)	3.1829e-10	0.0451078	0.000642925	2.07037e-16	0.0223167	0.0221925	0.00206322	0.00030712	0.245423	0.166961	0.00838028	0.0195565	0.00408698	0.0257917	7.78724e-06
179546	Water bodies (X1)	4.37563e-21	0.338379	7.44474e-07	8.60051e-24	0.0171024	0.00130086	0.000280235	1.59469e-06	0.21544	0.0653118	2.74677e-05	0.00202424	0.00291567	0.0402001	8.21298e-08
179548	Dwarf shrub (X13)	1.60148e-31	0.655811	3.86075e-10	2.70332e-46	0.0106829	0.000691418	0.000242648	2.39399e-09	0.0657345	0.0381794	3.21435e-10	0.00145337	0.00396561	0.115883	1.07974e-09
180343	Water bodies (X1)	2.54553e-24	0.553623	1.32137e-08	5.50089e-38	0.0286779	0.00187688	0.000187008	3.78763e-09	0.047456	0.0182258	4.41174e-10	0.00119684	0.00583917	0.0812478	1.29105e-07
180354	Water bodies (X1)	4.08405e-26	0.657965	6.40727e-09	1.19799e-34	0.0409396	0.000503499	8.87186e-05	4.19863e-09	0.024889	0.00275325	7.84889e-10	0.00153568	0.00777168	0.0785343	4.51477e-07
180357	Water bodies (X1)	2.26087e-17	0.941321	3.33368e-07	4.43905e-35	0.0385441	0.0711921	0.000419007	4.48446e-08	0.00128034	0.00187319	4.14936e-11	0.000625994	0.00566428	0.0208579	1.81386e-05
180366	Moist moss (X11)	8.71428e-05	0.00645561	0.0195088	2.01572e-21	0.0131703	0.0593864	0.00801996	0.00784723	0.129244	0.280111	0.207307	0.0998654	0.00502888	0.0205886	3.51368e-06
180368	Moist moss (X11)	9.49593e-07	0.00983428	0.00116375	1.7417e-32	0.00537369	0.019806	0.00773385	0.00348986	0.0754548	0.300215	0.249095	0.139552	0.0102253	0.0430982	1.13024e-06
180369	Moist moss (X11)	1.12573e-07	0.00787908	0.0029652	1.04731e-28	0.00964812	0.0244022	0.00964618	0.0151189	0.117073	0.204969	0.253705	0.206979	0.00711218	0.0250431	1.23787e-06
181176	Willow wetland (X8)	0.011522	0.000700705	0.00301775	1.79245e-38	0.0405473	0.0661926	0.00253058	7.31472e-05	0.381744	0.142877	0.0750153	0.0202978	0.0123852	0.0258828	1.4517e-05
181178	Sparse birch forest (X4)	0.0188514	0.00277802	0.0146643	8.69208e-12	0.282595	0.0242887	0.000330792	3.70048e-05	0.118324	0.0142925	0.0157192	0.00300162	0.017131	0.034676	0.00956399
181182	Water bodies (X1)	5.50187e-12	0.660772	2.63158e-05	1.75822e-21	0.0436667	0.030422	0.000261023	9.11725e-07	0.0126563	0.00791282	3.55115e-07	0.000478903	0.00376014	0.013976	2.02213e-05
181185	Water bodies (X1)	1.14056e-25	0.619123	1.08292e-08	4.51357e-36	0.0351209	0.00104258	9.71942e-05	6.60862e-09	0.0429923	0.00536675	3.24236e-09	0.000610069	0.00455726	0.0504239	9.08002e-08
181186	Water bodies (X1)	1.59456e-25	0.579609	1.42938e-08	2.53022e-38	0.0200726	0.00366009	0.000312968	1.66781e-08	0.0522223	0.023647	2.97452e-09	0.00124285	0.00380737	0.0605342	3.84383e-08
181187	Sparse birch forest (X4)	0.0577469	0.0149015	0.0173001	1.20206e-08	0.0752104	0.384561	0.00138757	6.27193e-05	0.0751635	0.0220059	0.0661461	0.00405551	0.00659617	0.0192028	0.0148561
181190	Sedge wetland (X10)	3.8264e-05	0.00147651	0.00342893	8.10954e-28	0.0278768	0.107367	0.0059886	0.000739051	0.238295	0.160508	0.394138	0.0638958	0.0111917	0.040335	6.57089e-05
181195	Moist moss (X11)	0.0016873	0.00283466	0.00310356	6.67337e-33	0.0116212	0.0188668	0.00606721	0.00136594	0.0838405	0.255993	0.154765	0.165185	0.0208419	0.0634797	1.45503e-05
181205	Dwarf shrub (X13)	1.74111e-23	0.617032	4.33924e-08	5.61755e-28	0.0203694	0.000237614	0.000133869	4.76638e-08	0.0342195	0.0126661	2.73945e-08	0.00419544	0.00824136	0.102023	3.63993e-07
181206	Water bodies (X1)	6.88951e-24	0.635615	3.00481e-08	9.50197e-30	0.0246081	0.000329373	0.000119249	2.54891e-08	0.0299732	0.00842077	1.10262e-08	0.00283313	0.00782331	0.0897575	3.87549e-07
181998	Water bodies (X1)	8.22566e-12	0.130787	0.000131253	1.71072e-16	0.0343674	0.0268986	0.000705431	1.62789e-05	0.232154	0.0906168	0.000425219	0.00222914	0.00298537	0.0203008	8.31823e-06
182003	Willow wetland (X8)	0.00201726	0.00171107	0.00437539	6.67925e-31	0.0419632	0.0760831	0.00281838	0.000201827	0.410545	0.153754	0.095713	0.0221617	0.00931401	0.0225435	3.3264e-05
182006	Exposed rock (X2)	0.0576078	0.000663035	0.182268	1.55997e-23	0.310009	0.0492973	0.000915335	0.000460874	0.0116169	0.00269867	0.000646514	0.0112376	0.0085693	0.00799513	4.90515e-05
182017	Moist moss (X11)	1.72744e-05	0.00393094	0.0057881	4.64529e-22	0.0352434	0.0472073	0.00987931	0.00932668	0.0930395	0.0990499	0.129937	0.32389	0.0203903	0.0554806	0.000620287
182022	Willow wetland (X8)	2.02342e-06	0.000741428	0.00263527	1.51612e-33	0.0487526	0.120005	0.0119559	0.00184302	0.301772	0.0944673	0.0766992	0.250898	0.0148281	0.0352913	9.27305e-05
182025	Moist moss (X11)	5.10881e-05	0.00186717	0.00456233	6.12571e-37	0.0101141	0.0455862	0.0131447	0.00481918	0.0946726	0.252839	0.128836	0.250817	0.0111985	0.0335143	1.33152e-06
182026	Moist moss (X11)	1.89864e-05	0.00295601	0.001063	1.70775e-41	0.00805171	0.0185524	0.00815551	0.00168026	0.11428	0.27752	0.0915014	0.186198	0.0155051	0.0432675	9.64974e-07
182027	Moist moss (X11)	0.00308881	0.0213989	0.00486555	3.00004e-31	0.00260611	0.00835006	0.0044944	0.00325756	0.0451079	0.604389	0.197016	0.0528192	0.00779904	0.0356278	1.07336e-07
182829	Willow wetland (X8)	0.0123208	0.00152834	0.00530874	2.61638e-28	0.061248	0.103746	0.00275184	0.000201136	0.422199	0.094369	0.150362	0.0265498	0.0125126	0.0251152	0.000367465
182831	Willow wetland (X8)	0.0392326	0.00135301	0.0157682	2.50645e-39	0.0316221	0.0527453	0.00490471	0.00134565	0.225726	0.174322	0.0167955	0.0514477	0.00794387	0.0119414	1.10774e-06
182833	Forested wetland (X5)	0.0371008	0.000753111	0.117775	1.68597e-09	0.309486	0.190358	0.00119166	0.000218042	0.0734932	0.0113519	0.0360626	0.00747947	0.00916604	0.0209149	0.0061755
182836	Willow wetland (X8)	0.0427871	0.00299269	0.0333252	4.60489e-12	0.186328	0.0183268	0.000647987	0.00022064	0.100748	0.0353708	0.0165448	0.00868525	0.0152733	0.0341534	0.00187385
182837	Sphagnum wetland (X9)	0.00269244	0.00785629	0.00213137	4.58758e-28	0.00939384	0.0442007	0.00355446	0.000415373	0.125287	0.29826	0.430496	0.0300893	0.0124165	0.0489363	2.67576e-05
182839	Sphagnum wetland (X9)	0.00401081	0.000466076	0.00133956	1.20072e-29	0.0297495	0.0116985	0.00195099	2.0196e-05	0.137144	0.144171	0.129191	0.0880402	0.042793	0.168787	0.000353106
182850	Moist moss (X11)	8.38948e-06	0.00041034	0.00442947	5.92715e-39	0.0397352	0.0727108	0.0191602	0.00472315	0.190078	0.104699	0.0280338	0.537965	0.0191217	0.037633	2.18488e-05
182851	Moist moss (X11)	2.0211e-07	0.00320459	0.00141561	3.73411e-34	0.0148622	0.0175193	0.0130126	0.0123725	0.0618826	0.114291	0.107309	0.50123	0.0217209	0.0562614	1.33602e-05
182854	Moist moss (X11)	0.000216133	0.00271332	0.000328354	1.86796e-67	0.00108727	0.0025376	0.00673554	0.00136155	0.0202069	0.554428	0.0447674	0.105131	0.0158204	0.0348688	1.11107e-10
182858	Water bodies (X1)	4.80926e-30	0.600008	9.24777e-10	2.31707e-41	0.0133587	0.000260342	0.000138333	3.07116e-09	0.068903	0.0254164	1.41147e-09	0.00156263	0.00492646	0.120914	3.12409e-09
183653	Forested wetland (X5)	7.25629e-05	0.0113053	0.00213903	3.65152e-23	0.0438842	0.5885	0.00181146	4.27395e-05	0.144496	0.0388314	0.182642	0.00119914	0.00390663	0.0123903	0.000265022
183657	Willow wetland (X8)	0.00426115	0.000582966	0.00128329	1.40979e-44	0.0160725	0.0183828	0.00364613	0.000125482	0.303096	0.301839	0.121325	0.0665268	0.0199712	0.0503733	2.16078e-06
183658	Willow wetland (X8)	0.00162742	0.00174861	0.00355029	2.42246e-36	0.0199185	0.0346577	0.00511021	0.000769446	0.253063	0.233695	0.0937013	0.0839832	0.0130308	0.0307754	6.36737e-06
183659	Willow wetland (X8)	1.19647e-05	0.00360847	0.00847485	6.09008e-28	0.024187	0.020793	0.00416528	0.00326227	0.339233	0.23593	0.0799919	0.0661342	0.00541065	0.015456	1.0141e-06
183664	Sphagnum wetland (X9)	0.0151727	0.000473633	0.00990079	1.37777e-31	0.108882	0.00346628	0.00105513	0.000246386	0.0972137	0.0624463	0.00933854	0.0468619	0.0321857	0.0556142	3.50827e-05
183667	Moist moss (X11)	0.00048399	0.000813289	0.00423501	7.36093e-30	0.0667713	0.0150043	0.00491197	0.00208697	0.109928	0.0886039	0.0700928	0.250697	0.0445166	0.0896702	0.00062195
183677	Moist moss (X11)	0.000480343	0.00021774	0.0144202	9.47925e-46	0.0258219	0.0405339	0.0197734	0.00940888	0.068708	0.148685	0.017866	0.513597	0.0175206	0.0304314	6.14247e-07
183681	Moist moss (X11)	5.7424e-06	0.0123348	0.000165797	1.12892e-79	0.000151772	0.00315165	0.019766	0.0197941	0.00109245	0.576872	0.0558629	0.171586	0.010861	0.0229603	5.23938e-13
183682	Moist moss (X11)	0.000204436	0.00209921	0.000505908	1.37855e-58	0.00209921	0.00521333	0.00768816	0.00119148	0.0336206	0.453808	0.0710335	0.15664	0.0184378	0.0458784	3.90728e-09
184485	Willow wetland (X8)	0.00907621	0.00231405	0.00310002	1.03728e-20	0.0399464	0.0179379	0.00178666	0.00015486	0.122207	0.13591	0.2746	0.0432774	0.0327757	0.115335	0.00199043
184486	Willow wetland (X8)	0.00059883	0.00266333	0.00180326	5.51262e-36	0.00978946	0.020662	0.00538531	0.000802136	0.140117	0.28302	0.236982	0.113072	0.0168353	0.0517287	5.42303e-06
184493	Sphagnum wetland (X9)	0.00148632	0.000143453	0.000399974	2.94679e-55	0.0108126	0.00292277	0.00236367	2.14771e-05	0.14772	0.290049	0.0531637	0.101546	0.039491	0.108117	1.58205e-07
184499	Moist moss (X11)	0.000417881	0.00273397	0.00566482	1.01734e-46	0.00607252	0.0232655	0.0158826	0.0156436	0.0627768	0.350216	0.0356209	0.283903	0.0100993	0.0198898	4.42824e-08
184503	Moist moss (X11)	5.44401e-05	0.000380443	0.0103685	1.7689e-57	0.00842536	0.0473004	0.0350202	0.0423921	0.0613094	0.271436	0.0226228	0.476122	0.00820234	0.0121756	2.76091e-09
184504	Moist moss (X11)	1.32217e-05	0.000591538	0.00131028	2.29209e-65	0.00415271	0.0211002	0.0364092	0.0168511	0.0242559	0.215808	0.0131117	0.66605	0.0187437	0.0258515	4.06153e-09
184513	Sphagnum wetland (X9)	1.14103e-10	0.0883495	0.000267825	2.70654e-18	0.0103892	0.0012953	0.000876939	0.000295306	0.259586	0.328214	0.0122776	0.017412	0.00503018	0.0361674	4.29589e-07
184514	Sphagnum wetland (X9)	2.68522e-07	0.138392	0.00123257	4.28457e-13	0.0102538	0.00138146	0.000773703	0.000686782	0.17694	0.32438	0.0305391	0.0160959	0.00600946	0.033062	2.67678e-06
184515	Water bodies (X1)	1.15694e-06	0.527629	0.000861754	3.31526e-08	0.0293652	7.41014e-05	0.000206831	0.000426994	0.0210591	0.182567	4.15054e-05	0.0124349	0.0210822	0.0783531	2.87488e-05
185314	Willow wetland (X8)	0.000589102	0.000425114	0.000985784	2.72616e-48	0.00669063	0.0165503	0.00537966	0.000136358	0.114497	0.351758	0.193497	0.101918	0.0189667	0.0675721	2.08233e-07
185315	Sphagnum wetland (X9)	0.00153956	0.00868973	0.00934427	7.4311e-14	0.0273284	0.117387	0.00500133	0.00116117	0.0931937	0.130571	0.261757	0.0640052	0.0125306	0.0512182	0.00196601
185316	Sparse birch forest (X4)	0.00223144	0.00644739	0.00638945	1.2646e-18	0.0250018	0.126984	0.00413584	0.000690901	0.142732	0.142468	0.422609	0.0351767	0.0110459	0.0409265	0.000674637
185323	Sphagnum wetland (X9)	1.17684e-06	0.00267512	0.00119257	3.03552e-38	0.0116033	0.033867	0.0123083	0.0036432	0.113372	0.185919	0.0940268	0.303016	0.0152631	0.0426119	3.82934e-06
185332	Moist moss (X11)	0.000211799	0.000688466	0.00638384	3.92382e-64	0.00575123	0.037884	0.0453025	0.0714355	0.0323242	0.254235	0.00782962	0.60092	0.0111365	0.0115566	1.6807e-09
185338	Sphagnum wetland (X9)	1.39461e-05	0.00181699	0.00045067	6.3005e-68	0.00113633	0.00598874	0.0144285	0.00466971	0.0147174	0.45327	0.0543647	0.228825	0.0135814	0.0295483	1.04892e-10
185339	Sphagnum wetland (X9)	0.00283698	0.00233375	0.00149378	9.18279e-53	0.00337654	0.00604615	0.0044277	0.000732502	0.0618827	0.489794	0.0572506	0.0571055	0.0117903	0.0301631	4.56741e-09
185340	Water bodies (X1)	0.0123062	0.175421	0.00564166	3.90871e-17	0.00456262	0.00459117	0.00148615	0.00189688	0.0488021	0.476908	0.0687477	0.0156257	0.00722725	0.0308896	2.96791e-06
185342	Sphagnum wetland (X9)	0.0247421	0.0828704	0.00495181	1.37837e-22	0.00350253	0.00442333	0.00114868	0.00070119	0.0495319	0.536835	0.150789	0.00730225	0.00616604	0.0294767	3.53246e-07
186139	Willow wetland (X8)	0.000148345	0.00410095	0.00880231	9.93584e-19	0.0426817	0.198563	0.00466357	0.000772549	0.279797	0.109527	0.226757	0.0339513	0.00679479	0.0229758	0.0003379
186150	Sphagnum wetland (X9)	0.000373228	0.00525878	0.0024624	6.0345e-45	0.00366974	0.0097919	0.00631143	0.00348332	0.0708161	0.487642	0.110792	0.0794931	0.0088724	0.0250977	1.57769e-08
186155	Sphagnum wetland (X9)	0.000913098	0.00171506	0.00331316	3.56979e-43	0.00789623	0.0255377	0.00887489	0.00246583	0.0896489	0.312665	0.126116	0.151387	0.0132688	0.0333262	3.57607e-07
186159	Moist moss (X11)	2.46557e-05	0.00100359	0.00740424	1.48078e-47	0.00927422	0.0372006	0.0211024	0.0196633	0.097965	0.28769	0.0371114	0.35742	0.00800042	0.0160763	2.66793e-08
186170	Sphagnum wetland (X9)	0.071857	0.0486751	0.0011967	3.83868e-21	0.0144033	0.00252124	0.000561053	4.68316e-05	0.0875648	0.179033	0.0186418	0.0144046	0.0230764	0.067621	0.000178422
186171	Sphagnum wetland (X9)	0.000358764	0.00565606	0.000113518	2.35357e-57	0.0013333	0.000756494	0.00330572	0.000258036	0.025792	0.523573	0.046373	0.14556	0.0373606	0.104628	1.05641e-08
186175	Sedge wetland (X10)	9.03523e-31	0.632107	6.81824e-10	2.07868e-43	0.00982024	0.000287749	0.000144614	3.41193e-09	0.0707817	0.0351403	2.22182e-09	0.00104825	0.00378255	0.107164	7.03454e-10
186968	Sphagnum wetland (X9)	0.000366815	0.000277425	0.00268022	8.82701e-41	0.0364427	0.0200171	0.00609937	0.00056314	0.130179	0.117941	0.0534712	0.241618	0.0320437	0.0695768	1.83933e-05
186979	Sphagnum wetland (X9)	1.13616e-08	0.0157878	0.00126017	9.26931e-28	0.00841458	0.00640005	0.00493766	0.00642668	0.16151	0.275261	0.113091	0.136976	0.00689542	0.0285641	4.2201e-07
186980	Sphagnum wetland (X9)	0.00264597	0.00598806	0.00758181	1.48529e-34	0.0100145	0.0105601	0.0032921	0.00201614	0.180601	0.427712	0.0619344	0.0379433	0.00667972	0.0182835	1.35531e-07
186983	Sphagnum wetland (X9)	0.000264895	0.00452128	0.000969609	1.83799e-33	0.00844924	0.00948888	0.00201181	0.00012565	0.248451	0.457275	0.210245	0.0229732	0.0118112	0.0534876	1.3525e-06
186989	Moist moss (X11)	0.000114523	0.00089498	0.0013012	1.33548e-46	0.0145198	0.014143	0.0112303	0.00216291	0.0947709	0.186215	0.0272268	0.44957	0.0317404	0.0597383	3.19065e-06
186995	Water bodies (X1)	7.49553e-06	0.327472	0.00360748	5.92813e-06	0.00686895	0.0022109	0.00108751	0.00175944	0.0463846	0.294749	0.0213313	0.0249596	0.00607115	0.0364032	1.10731e-05
186997	Water bodies (X1)	7.69351e-24	0.588967	6.99885e-08	3.27661e-30	0.0100867	0.000593535	0.000225807	2.23994e-07	0.0877876	0.0635407	6.07574e-07	0.00175274	0.00347837	0.0629308	1.33436e-08
186998	Sphagnum wetland (X9)	7.20522e-17	0.374004	5.96669e-06	2.44075e-16	0.0062305	0.000147561	0.000320821	2.17156e-05	0.175968	0.263433	0.00081524	0.0110098	0.00549668	0.0805483	1.13954e-07
186999	Sphagnum wetland (X9)	2.88756e-05	0.373016	0.00100905	1.80905e-17	0.00166852	0.00107726	0.00228285	0.0044934	0.0187249	0.544084	0.0640401	0.0821179	0.0126057	0.073581	2.15446e-06
187005	Willow wetland (X8)	1.50754e-33	0.656455	7.72121e-11	9.84652e-52	0.0141307	0.000653461	0.00014431	2.46698e-10	0.0578961	0.0197038	2.69487e-11	0.00059955	0.00381041	0.114626	4.54391e-10
187007	Forested wetland (X5)	1.48013e-06	0.0266295	0.0110485	5.02229e-08	0.0392817	0.0728363	0.0029041	0.00185651	0.182367	0.0832988	0.0616184	0.0303397	0.00403129	0.0167503	0.000174263
187790	Water bodies (X1)	3.27466e-06	0.00579502	0.0510795	6.43583e-09	0.0615393	0.102584	0.00429536	0.00795477	0.105922	0.0644637	0.134062	0.0425684	0.00385939	0.0150509	6.74606e-05
187792	Willow wetland (X8)	0.00117778	0.00175681	0.00729626	3.5135e-21	0.113466	0.430349	0.00294946	0.000102414	0.325482	0.0324298	0.101575	0.0128908	0.0083286	0.0192692	0.00374486
187796	Sparse birch forest (X4)	0.00285714	0.000184993	0.00236844	9.85777e-45	0.0292436	0.0232593	0.00416121	0.000154988	0.226438	0.186185	0.103229	0.0924627	0.0238219	0.0558539	3.61536e-06
187806	Sphagnum wetland (X9)	2.44228e-09	0.00513072	0.00171467	9.29622e-32	0.00980116	0.00845174	0.00485467	0.00499956	0.241871	0.28888	0.170542	0.089881	0.00441089	0.0193883	4.12085e-08
187815	Water bodies (X1)	0.00401719	0.117248	0.00282895	1.04191e-19	0.00504378	0.00272218	0.00116199	0.000686643	0.0644608	0.471822	0.0461783	0.016209	0.00911846	0.0405769	2.58361e-06
187816	Water bodies (X1)	9.34325e-07	0.139583	0.00229528	1.70062e-10	0.0115839	0.0069768	0.00202247	0.00241684	0.11664	0.239902	0.0461462	0.0432571	0.00694939	0.0341947	3.74033e-05
187819	Sphagnum wetland (X9)	0.000452188	0.0386743	0.0025275	5.53218e-36	0.0014041	0.00615054	0.00628376	0.00687745	0.0173264	0.5897	0.130424	0.0872175	0.00869425	0.0373873	2.78387e-08
187829	Water bodies (X1)	1.75509e-16	0.409336	1.42287e-05	1.9948e-16	0.00590357	0.00138031	0.000753291	0.000133598	0.144709	0.218796	0.00571266	0.00849888	0.00332745	0.042138	1.83935e-07
187831	Sphagnum wetland (X9)	4.02327e-24	0.523632	5.42935e-08	2.22605e-30	0.00940738	0.000279326	0.000199867	1.72559e-07	0.109109	0.0815045	5.95418e-07	0.0024877	0.00415883	0.0826258	9.72945e-09
187834	Willow wetland (X8)	4.42665e-16	0.356551	2.56671e-05	6.98139e-15	0.0123079	0.0040971	0.000572857	6.97812e-05	0.152723	0.0963595	0.00329775	0.00323581	0.00238142	0.0239297	4.78273e-07
188623	Willow wetland (X8)	1.004e-06	0.052605	0.00328268	1.1375e-11	0.0376539	0.169027	0.00380038	0.00160899	0.230872	0.0923274	0.0688472	0.0216433	0.00506366	0.0180594	0.000863271
188631	Sphagnum wetland (X9)	9.67171e-06	0.000247063	0.000403454	3.93619e-67	0.00274468	0.00565839	0.0117	0.000803679	0.0156854	0.291648	0.0472211	0.31757	0.0260491	0.065408	9.98546e-10
188632	Sphagnum wetland (X9)	0.0026832	0.000154074	0.000920761	1.70596e-61	0.00987559	0.00616956	0.00455196	0.000153254	0.162881	0.32749	0.035447	0.117043	0.0236177	0.0445241	1.44553e-08
188634	Dwarf shrub (X13)	0.000594019	0.0065941	0.0127319	9.02863e-25	0.0130393	0.063439	0.00781202	0.00494942	0.128228	0.284607	0.171945	0.0937089	0.00693042	0.0241481	7.18008e-06
188637	Sphagnum wetland (X9)	0.0140207	0.00016281	0.000772491	5.03231e-53	0.0314642	0.00662024	0.00136564	1.16006e-05	0.327163	0.127643	0.0209176	0.0358528	0.0271746	0.0446262	8.01805e-07
188639	Sedge wetland (X10)	0.00184458	0.0393499	0.00124434	5.78925e-18	0.0177967	0.0188741	0.000901882	5.5387e-05	0.170084	0.197381	0.0799478	0.00676142	0.0115744	0.0472755	0.000255673
188641	Water bodies (X1)	1.52154e-17	0.445783	4.202e-06	1.10712e-18	0.00879684	0.000686609	0.000308459	1.12437e-05	0.167637	0.156044	0.000438636	0.00301215	0.00347045	0.0451762	1.19346e-07
188648	Sphagnum wetland (X9)	2.13745e-05	0.0149533	0.000224298	7.72828e-72	0.000255514	0.00233965	0.0128068	0.0114717	0.0023755	0.59069	0.054508	0.146238	0.0121965	0.0279341	5.24725e-12
188649	Sphagnum wetland (X9)	0.000648053	0.00780675	0.000751669	4.74477e-47	0.00272289	0.0048184	0.00528022	0.00145298	0.0392917	0.429003	0.081239	0.118063	0.0180474	0.048662	6.61839e-08
188660	Sphagnum wetland (X9)	2.60614e-07	0.285471	0.00126236	1.42478e-07	0.0145444	0.0064477	0.00151213	0.00100812	0.106003	0.202908	0.00670248	0.0316805	0.00741599	0.0378757	0.000124232
188661	Sphagnum wetland (X9)	2.60142e-06	0.122753	0.00135795	4.38205e-14	0.00793834	0.0149271	0.00402898	0.00335007	0.0850531	0.275623	0.103627	0.0885893	0.0107529	0.0523106	0.000133169
189449	Forested wetland (X5)	0.00312945	0.00373494	0.00545947	2.77924e-20	0.0640855	0.345682	0.00258925	0.000110663	0.17911	0.0454989	0.205768	0.00945033	0.00943835	0.0260925	0.00293343
189454	Moist moss (X11)	2.93204e-06	0.000824204	0.00811831	1.24592e-40	0.0247224	0.031051	0.0182066	0.0312414	0.086049	0.136235	0.0332855	0.464736	0.0129345	0.0239622	7.09751e-07
189458	Moist moss (X11)	0.000119701	0.000162487	0.00349612	9.04366e-58	0.0103341	0.0129587	0.0136229	0.0032503	0.0403508	0.23673	0.0255811	0.349783	0.0195554	0.0383302	1.06395e-08
189461	Sphagnum wetland (X9)	1.64345e-05	0.00503699	0.00369051	2.12318e-32	0.0123309	0.0188392	0.00735262	0.00499547	0.176393	0.282151	0.0807913	0.169294	0.00955619	0.02748	1.57133e-06
189468	Water bodies (X1)	1.5655e-21	0.52172	2.46919e-07	1.31358e-28	0.00464518	0.00040718	0.000292412	7.92714e-07	0.115278	0.254066	8.97592e-06	0.00209932	0.00319733	0.0744561	3.35259e-09
189487	Water bodies (X1)	5.5783e-22	0.372551	3.08359e-07	2.38254e-27	0.0169611	0.00206095	0.000443555	6.39629e-07	0.134585	0.0618425	1.3029e-06	0.00393992	0.00383143	0.0571715	1.3167e-07
190279	Willow wetland (X8)	0.00031524	0.00283732	0.00523784	1.39055e-19	0.0553382	0.355284	0.00215434	5.47213e-05	0.277388	0.0687673	0.262059	0.00507121	0.00555829	0.0215674	0.000457825
190280	Willow wetland (X8)	0.00199287	0.000509002	0.00470586	4.83893e-28	0.0720196	0.0242387	0.00266588	0.000304167	0.135492	0.0769249	0.152835	0.0776971	0.0327503	0.0824411	0.000569263
190292	Sphagnum wetland (X9)	2.24078e-05	0.000672228	0.00281043	2.31164e-43	0.0150978	0.0205188	0.0149677	0.00540467	0.0798158	0.172925	0.0503427	0.507847	0.0226257	0.0496789	1.76172e-06
190304	Sphagnum wetland (X9)	3.00237e-17	0.467796	5.27231e-06	1.20604e-17	0.0190366	0.0021174	0.000468546	7.55021e-06	0.0689651	0.0400329	1.61014e-05	0.00733034	0.00502576	0.0448519	2.91206e-06
190306	Forested wetland (X5)	0.00142031	0.0887055	0.00452217	2.4808e-06	0.159595	0.000242613	0.000119747	8.87218e-05	0.0935093	0.0531741	0.000100214	0.00692437	0.0255615	0.0529371	0.001287
191117	Sphagnum wetland (X9)	1.58813e-05	0.125353	0.00186939	1.08146e-14	0.00724886	0.0186793	0.00237195	0.00166108	0.100501	0.326508	0.21963	0.0198373	0.00676611	0.0351548	2.95722e-05
191118	Sphagnum wetland (X9)	0.00202028	0.000759865	0.000591376	9.90048e-59	0.00443388	0.00313019	0.0035941	0.000211125	0.120658	0.485426	0.0481421	0.0786035	0.019742	0.0456102	5.67882e-09
191123	Sphagnum wetland (X9)	3.41453e-08	0.303364	0.000470855	3.03415e-14	0.00460188	0.00148757	0.000406646	0.00018688	0.102371	0.404569	0.0741788	0.00210828	0.00343542	0.0285482	2.18062e-07
191124	Water bodies (X1)	2.54679e-30	0.670668	8.21934e-10	4.68338e-45	0.00972385	0.000827839	0.000219688	4.04822e-09	0.0673924	0.0449183	1.11235e-09	0.000884589	0.00322944	0.0902226	7.76143e-10
191133	Sphagnum wetland (X9)	1.69898e-16	0.36472	1.0743e-05	2.26905e-14	0.0113448	0.0004442	0.000409396	2.5279e-05	0.131816	0.12007	0.000282236	0.0129558	0.00536835	0.0608423	7.72358e-07
191930	Forested wetland (X5)	0.0153019	0.000882745	0.0766787	1.10281e-10	0.39963	0.416523	0.00169047	0.000165993	0.239344	0.00972799	0.0172759	0.00919186	0.00764967	0.0135743	0.0268361
191933	Forested wetland (X5)	0.0026416	0.00883081	0.00499171	2.8187e-17	0.11613	0.52133	0.00118882	2.11825e-05	0.200261	0.0174487	0.0347646	0.001725	0.00565633	0.0128033	0.00633551
191941	Sphagnum wetland (X9)	0.0121055	0.0017829	0.00279919	1.09954e-35	0.0125667	0.0276687	0.00309814	0.000178005	0.184719	0.307934	0.202755	0.0343356	0.0132973	0.0434111	3.9184e-06
191947	Moist moss (X11)	5.60162e-05	0.000269209	0.00280976	2.10062e-47	0.0244236	0.022487	0.0127249	0.002893	0.125273	0.140341	0.0395488	0.447842	0.0253245	0.045069	1.75056e-06
191952	Water bodies (X1)	6.5061e-24	0.551923	8.78765e-08	5.18498e-29	0.0104862	0.000616863	0.000249768	3.71104e-07	0.106105	0.0644303	1.33573e-06	0.00212751	0.00336192	0.0607092	1.60007e-08
191973	Dwarf shrub (X13)	6.57943e-05	0.00164987	0.0472492	9.97505e-08	0.250738	0.286008	0.0035354	0.000957989	0.197551	0.0278771	0.0242023	0.0324991	0.00793257	0.0237026	0.0106156
191974	Dwarf shrub (X13)	0.00251912	0.00106939	0.0862153	1.35459e-06	0.362893	0.303175	0.00270992	0.000486899	0.138567	0.013521	0.0102566	0.0317605	0.0107343	0.0250546	0.0522851
192766	Moist moss (X11)	0.000393525	0.00014996	0.0118241	2.20666e-39	0.0597607	0.0360022	0.0113588	0.00286352	0.128566	0.0927795	0.02106	0.436856	0.0245506	0.0444331	1.41215e-05
192770	Sphagnum wetland (X9)	0.00212169	0.0137184	0.0026422	5.18887e-27	0.0094945	0.0250866	0.00339918	0.000819119	0.134408	0.324579	0.220591	0.0384068	0.0114309	0.0402997	1.58257e-05
192772	Sphagnum wetland (X9)	0.00300457	0.0401266	0.00400862	1.33965e-17	0.00833234	0.0318104	0.00317355	0.000842269	0.0903701	0.358403	0.178989	0.031409	0.00968722	0.0466864	6.80188e-05
192774	Sphagnum wetland (X9)	0.00834928	0.00133379	0.00333868	1.28722e-37	0.0175029	0.0380835	0.00455653	0.000418986	0.159025	0.199464	0.142043	0.0685623	0.0159171	0.0386037	8.41432e-06
193589	Forested wetland (X5)	2.03516e-07	0.057625	0.00117241	4.27331e-12	0.103253	0.220238	0.000792234	1.98804e-05	0.334869	0.0369492	0.00210563	0.00119615	0.00326119	0.0117456	0.000878592
193594	Sedge wetland (X10)	0.000145531	0.000420789	0.0100494	8.86884e-29	0.0941375	0.0603726	0.00858709	0.00291627	0.214997	0.0701806	0.0544696	0.307877	0.0238263	0.0472067	0.000495064
193609	Water bodies (X1)	3.12576e-13	0.511914	3.20951e-05	8.1782e-17	0.00828435	0.00180312	0.000330416	1.51401e-05	0.0687926	0.164112	0.000303577	0.00174796	0.00325365	0.0323569	2.71924e-07
193630	Sphagnum wetland (X9)	2.71751e-08	0.0119461	0.00704645	1.53048e-21	0.0124983	0.00494735	0.00413943	0.0142958	0.20872	0.280536	0.0876242	0.126019	0.00394706	0.0168776	1.46393e-07
194420	Willow wetland (X8)	5.44712e-08	0.0299539	0.000910834	4.39016e-16	0.0627557	0.510623	0.000919874	2.21557e-05	0.243352	0.0271012	0.112917	0.000407142	0.00217649	0.00919649	0.000222934
194421	Willow wetland (X8)	5.0501e-07	0.0231791	0.00265149	2.9094e-15	0.0536556	0.524296	0.00301936	0.000320241	0.238076	0.0507768	0.139517	0.00394807	0.00324664	0.0120561	0.000600851
194430	Sedge wetland (X10)	0.0280822	0.00159526	0.00194059	7.77551e-27	0.04417	0.0435878	0.00145902	2.89945e-05	0.165155	0.0626099	0.198666	0.0227297	0.0260314	0.0684749	0.00164997
194433	Moist moss (X11)	8.14383e-05	0.0232955	0.0111904	9.58957e-14	0.0217965	0.0814832	0.00761671	0.00844814	0.143972	0.173285	0.124822	0.128249	0.00793228	0.0274495	0.00035425
194438	Water bodies (X1)	1.15705e-26	0.687605	7.22009e-09	1.63592e-37	0.0113426	0.000764361	0.000222076	2.24377e-08	0.051053	0.0371213	8.03204e-09	0.00148739	0.00411141	0.0809924	8.67877e-09
195262	Sedge wetland (X10)	0.00211433	0.0157964	0.00935619	4.99279e-17	0.0288446	0.2725	0.00343449	0.000873882	0.124296	0.0836203	0.367226	0.0112662	0.00584299	0.0175934	0.000487868
196070	Forested wetland (X5)	0.000179128	0.0259467	0.0033387	8.38311e-16	0.0879666	0.833503	0.00146222	2.4698e-05	0.0623798	0.00778573	0.0518823	0.000704182	0.00372399	0.00921436	0.00860562
196903	Willow wetland (X8)	9.95486e-06	0.0157661	0.00248343	2.24093e-11	0.114957	0.311679	0.0017527	0.000104397	0.458163	0.036106	0.0684418	0.00657918	0.00651126	0.0189256	0.0174581
197747	Sedge wetland (X10)	9.26185e-05	0.0418881	0.00464994	1.61276e-12	0.032961	0.0656548	0.00133416	0.000405967	0.271218	0.12771	0.149093	0.00527104	0.00471794	0.0169063	0.000194332
198556	Forested wetland (X5)	9.40183e-05	0.0426684	0.00129711	4.33899e-18	0.064199	0.835022	0.00120519	1.48534e-05	0.0184145	0.00429289	0.0796883	0.000455654	0.00515504	0.0126834	0.0139539
198564	Sedge wetland (X10)	0.000198214	0.00885008	0.0062501	1.01302e-12	0.0725025	0.280915	0.00331711	0.000523642	0.342069	0.0593281	0.267772	0.020728	0.00820077	0.023934	0.0100162
198566	Forested wetland (X5)	0.000345845	0.0157162	0.00122105	2.2967e-26	0.0436397	0.68687	0.00155262	4.0681e-05	0.0221953	0.00699751	0.347161	0.000954084	0.00720852	0.0147266	0.00213982
198567	Sedge wetland (X10)	0.00333868	0.00855571	0.00273702	8.2148e-24	0.0596579	0.504698	0.00151099	4.88233e-05	0.0725968	0.0134583	0.256284	0.00202493	0.0078216	0.0155936	0.00270199
198568	Sedge wetland (X10)	0.0188962	0.00704179	0.00813514	1.43432e-17	0.0479741	0.123951	0.00170418	0.000140018	0.235188	0.0818134	0.164827	0.0095185	0.00844911	0.0238646	0.00095217
199386	Forested wetland (X5)	3.98953e-05	0.0282675	0.00170189	2.0523e-15	0.101667	0.747965	0.00132812	1.3274e-05	0.122482	0.0122845	0.0174537	0.000907317	0.00453359	0.0126109	0.0139228
199390	Forested wetland (X5)	0.00182314	0.0036658	0.0129345	5.67291e-14	0.102688	0.325583	0.00312027	0.000407	0.286796	0.0374722	0.232537	0.0204509	0.00879158	0.0217964	0.0112159
199391	Forested wetland (X5)	0.00196319	0.0057024	0.00383585	4.25698e-19	0.0970934	0.518502	0.00199687	4.77389e-05	0.161195	0.0174464	0.102526	0.00518964	0.00899855	0.0201359	0.0152121
199393	Forested wetland (X5)	0.000233234	0.0180702	0.00167301	1.44426e-21	0.0474877	0.500461	0.00158532	0.000103569	0.048673	0.0140054	0.468284	0.00166489	0.00771361	0.0178342	0.00326214
199403	Dwarf shrub subsiding (X14)	2.70778e-06	0.00630436	0.00384898	4.53971e-16	0.0446844	0.0806894	0.00328618	0.00142902	0.163566	0.10623	0.430226	0.0263796	0.0100739	0.0419451	0.00049146
199404	Dwarf shrub subsiding (X14)	0.250262	0.00497688	0.0583662	9.63061e-16	0.0909376	0.225962	0.00323553	0.000727793	0.113916	0.0322082	0.018124	0.0314327	0.00780722	0.0135903	0.00207509
200212	Forested wetland (X5)	0.000115081	0.0147526	0.0035274	2.0593e-13	0.0890128	0.581904	0.0017131	8.47246e-05	0.112335	0.0141252	0.221325	0.00260142	0.00638908	0.0173658	0.0185285
200216	Forested wetland (X5)	0.0126018	0.0118622	0.00879417	1.98899e-13	0.201782	0.665768	0.00145129	4.87461e-05	0.175629	0.00710238	0.0206157	0.00289405	0.0071508	0.0109053	0.107358
200218	Forested wetland (X5)	4.89715e-05	0.0197654	0.0032467	3.02351e-11	0.0875532	0.426053	0.00247297	0.000169544	0.25316	0.0300877	0.0909264	0.0090936	0.0073552	0.0209843	0.0304197
200225	Sedge wetland (X10)	0.00389826	0.0001327	0.00301193	3.57277e-36	0.0918905	0.0577368	0.00117109	1.22239e-05	0.151558	0.031468	0.159899	0.0104552	0.0206665	0.0489279	8.34476e-05
200230	Sphagnum wetland (X9)	6.36535e-06	0.00800479	0.00328204	1.80929e-21	0.0184168	0.0955652	0.00623605	0.00283979	0.133253	0.156439	0.517326	0.0599313	0.00918881	0.0366399	0.00010123
200231	Dwarf shrub subsiding (X14)	0.0253543	0.000650824	0.0643612	2.29789e-18	0.126493	0.078418	0.00347623	0.00110234	0.123768	0.0571718	0.0396847	0.0658401	0.0133027	0.0317562	0.000603883
200234	Sphagnum wetland (X9)	0.000239708	0.234917	0.00588595	5.58995e-07	0.0112422	0.0164638	0.00114548	0.000508013	0.0392342	0.184191	0.0156505	0.00839939	0.00503441	0.0262177	5.23674e-05
200235	Water bodies (X1)	2.15799e-24	0.550607	5.17364e-08	5.23392e-30	0.0110144	0.000351437	0.000185131	1.64965e-07	0.0955427	0.0530168	5.62963e-07	0.00204642	0.00391343	0.0714757	1.37798e-08
201055	Moist moss (X11)	0.00199206	0.00182055	0.0111265	4.59478e-33	0.0247087	0.0737667	0.00954239	0.00409972	0.184379	0.179118	0.0782406	0.161604	0.010728	0.0223543	1.17565e-05
201062	Moist moss (X11)	0.035033	0.00716037	0.0294731	2.09739e-09	0.0650514	0.00758859	0.00160039	0.000847512	0.0392841	0.0931977	0.00941849	0.0791358	0.0238006	0.0774118	0.0018326
201875	Forested wetland (X5)	0.00108869	0.0231902	0.00350924	1.01585e-15	0.1005	0.785126	0.00123605	2.44054e-05	0.0269535	0.00429421	0.0605075	0.000828253	0.00609692	0.0128993	0.0308896
201879	Sedge wetland (X10)	5.44486e-07	0.0303857	0.00192407	5.92304e-12	0.0498717	0.14858	0.00158791	0.00016625	0.370806	0.0872621	0.0888419	0.00486111	0.00415463	0.0181147	0.000499396
201886	Willow wetland (X8)	0.000131237	0.00280431	0.0520421	6.90338e-09	0.244753	0.376846	0.00213813	0.000878084	0.170549	0.0198488	0.062693	0.00648333	0.00489818	0.0123587	0.00336035
202695	Willow wetland (X8)	0.0037162	0.00232829	0.00921438	1.31232e-20	0.0815638	0.168118	0.00368248	0.000521855	0.458907	0.0818719	0.180074	0.0391761	0.0109373	0.0241237	0.00232309
202701	Forested wetland (X5)	0.000141728	0.00672962	0.00155811	2.07811e-26	0.115908	0.813357	0.00202276	1.90289e-05	0.0720465	0.00550298	0.0300241	0.00173024	0.00706606	0.0122116	0.00854597
202702	Forested wetland (X5)	0.00124945	0.0102374	0.00387554	3.96408e-15	0.171857	0.421743	0.000772702	3.89654e-05	0.0185349	0.00236091	0.0892828	0.0014926	0.0133012	0.0228647	0.0858373
202708	Sedge wetland (X10)	0.0110245	0.000707423	0.00257624	3.12328e-31	0.0363161	0.0690925	0.00187301	3.63685e-05	0.18284	0.0831897	0.377853	0.0170289	0.0175182	0.0515947	0.000156916
202713	Exposed rock (X2)	3.20898e-05	0.00364602	0.0692752	3.69746e-15	0.0439193	0.0746752	0.00531782	0.0174327	0.196913	0.139275	0.262481	0.0514157	0.00345165	0.0113172	7.56796e-06
202716	Sparse birch forest (X4)	0.00102508	0.00126007	0.185767	2.65367e-07	0.271976	0.186895	0.00191153	0.00409202	0.220194	0.0260077	0.244977	0.00913841	0.00448232	0.0100833	0.000861788
203523	Willow wetland (X8)	0.000135022	0.00279805	0.0097517	6.21376e-19	0.0771135	0.104593	0.00448085	0.00148168	0.552895	0.106478	0.151356	0.0700136	0.0088046	0.0213605	0.000783562
203534	Forested wetland (X5)	3.2931e-06	0.00796918	0.00378404	9.51026e-15	0.101195	0.491136	0.00239264	0.000194032	0.350581	0.0295431	0.202065	0.00505212	0.00455542	0.0135937	0.00311731
203542	Forested wetland (X5)	0.00248302	0.00318245	0.134586	2.85642e-19	0.0726092	0.37138	0.00666302	0.00486699	0.0264636	0.0141517	0.0131516	0.0500969	0.00379156	0.00648181	5.55301e-05
204366	Sphagnum wetland (X9)	0.00216037	0.000174461	0.00197568	3.35697e-46	0.0224991	0.0148314	0.00365333	0.000171158	0.262143	0.262076	0.214158	0.0749547	0.0227294	0.0582254	1.13451e-06
204377	Water bodies (X1)	2.5204e-25	0.646493	1.4304e-08	1.78242e-34	0.0142469	0.000744805	0.000278172	3.24024e-08	0.0505912	0.0367716	5.49969e-09	0.00353095	0.00588381	0.102611	5.67774e-08
205183	Forested wetland (X5)	0.00172201	0.00473606	0.00422689	1.60561e-18	0.153601	0.483332	0.00126175	2.96383e-05	0.0611514	0.00634679	0.0527925	0.0029329	0.0113225	0.0221984	0.0302314
205205	Willow wetland (X8)	4.61831e-21	0.269379	1.02714e-06	8.03369e-21	0.0110179	0.000326442	0.000276147	3.55346e-06	0.196695	0.0938958	0.000136474	0.00567492	0.00377685	0.0633225	4.84003e-08
206023	Forested wetland (X5)	0.0120793	0.00162783	0.143645	6.78218e-07	0.19558	0.131012	0.00371593	0.00306761	0.0901791	0.0332842	0.029763	0.0708883	0.0112614	0.0283592	0.00823625
206024	Sparse birch forest (X4)	0.0360079	0.000919142	0.141632	1.09383e-10	0.239822	0.3288	0.00276559	0.000432335	0.113408	0.0141897	0.0162531	0.026358	0.00718579	0.015104	0.00552326
206026	Sparse birch forest (X4)	0.00585292	0.0023515	0.0705087	3.65962e-06	0.326351	0.321755	0.00196409	0.000484231	0.117022	0.0109247	0.0211436	0.0142594	0.00952745	0.0196326	0.0594804
206847	Forested wetland (X5)	0.00224327	0.0030181	0.00872543	1.06447e-19	0.0844047	0.330961	0.00294645	0.00027216	0.281991	0.0473582	0.228033	0.0126805	0.00835098	0.0198942	0.0025412
206850	Sphagnum wetland (X9)	0.000322589	5.4964e-05	0.00179778	8.92196e-56	0.0173438	0.0129878	0.00605813	0.000175843	0.120516	0.213892	0.0616016	0.170228	0.0244081	0.059689	6.9928e-08
206852	Forested wetland (X5)	0.0649525	0.000275342	0.1503	6.04007e-06	0.519688	0.224077	0.00110714	5.15896e-05	0.0791209	0.00461503	0.0059261	0.0157652	0.0137854	0.0304854	0.0906702
206853	Sparse birch forest (X4)	0.0377335	0.000487279	0.101314	1.75472e-06	0.442221	0.192543	0.0013071	7.93584e-05	0.0649169	0.00552031	0.00593338	0.02182	0.0160001	0.0353869	0.10535
208509	Exposed rock (X2)	7.70588e-05	0.000470057	0.0562106	6.13168e-28	0.295975	0.0828289	0.00298714	0.00992624	0.255006	0.0187593	0.0392376	0.0279904	0.00743186	0.00730328	3.72832e-05
214994	Sparse birch forest (X4)	0.464663	0.0036733	0.0921576	4.08853e-54	0.0462854	0.220883	0.00227059	0.00234088	0.00579066	0.00467086	0.00037065	0.00251528	0.00193113	0.000633575	3.50091e-09
214996	Anthropogenic (X0)	0.567956	0.0055312	0.126084	5.81032e-24	0.0845628	0.175712	0.00283376	0.00217648	0.0315742	0.0139024	0.00461466	0.0202083	0.00543542	0.00522117	6.16308e-05
214997	Anthropogenic (X0)	0.648592	0.00875791	0.0773422	3.99024e-20	0.0737177	0.0987721	0.0022921	0.001841	0.126953	0.0440292	0.0142961	0.0191566	0.00615438	0.00747234	0.00015959
215819	Anthropogenic (X0)	0.793579	0.00220876	0.153211	9.3696e-61	0.044036	0.168128	0.00482122	0.0166404	0.0190281	0.0173912	0.000226088	0.00764481	0.00193709	0.000484425	5.13079e-10
215820	Anthropogenic (X0)	0.720885	0.00605657	0.0947214	3.23571e-72	0.048694	0.106182	0.00257517	0.0189354	0.00658172	0.00475614	1.74228e-05	0.0022424	0.00148836	0.000155274	2.52171e-11
215823	Anthropogenic (X0)	0.68348	0.00496377	0.0893315	1.76442e-73	0.0368546	0.119979	0.00233608	0.0120348	0.00540939	0.00566416	3.48549e-05	0.00134144	0.00122915	0.000153787	7.91811e-12
215827	Forested wetland (X5)	0.531584	0.000440662	0.0583964	6.36564e-43	0.0467902	0.0779839	0.000331498	1.21427e-05	0.00753316	0.00993181	0.0164235	0.000200708	0.00240143	0.0035271	5.9127e-09
216640	Anthropogenic (X0)	0.219382	0.0184937	0.256535	0.931602	0.324688	0.208565	0.000879697	0.00448159	0.0684989	0.00646477	0.064971	0.00309458	0.0050613	0.00600148	0.0288307
216641	Anthropogenic (X0)	0.595589	0.0103598	0.170109	2.3808e-08	0.215504	0.0535363	0.00101566	0.00139133	0.0207146	0.0053333	0.00266992	0.0182283	0.0105617	0.0111841	0.00677608
[truncated: 111 more rows]

## Sheet: Majority_NN_3neurons
			Reference data
[truncated: 39 more rows]

## Sheet: Majority_NN_3neurons_classif
			One-hot encoded hard classification output
[truncated: 421 more rows]

[truncated: 1 more sheets: Mixedp_rescale_area_calculation]
